# Supplementary material for: Origin and Early Evolution of Hydrocharitaceae and the Ancestral Role of Stratiotes
Source: MDPI journal article supplement (doi:10.3390/plants13071008), 2024-03-31
Supplement: s1 [file s1]

## Supplementary material 02

### Distribution and climate of Hydrocharitaceae

#### 1. Köppen-Geiger climate symbols and defining criteria (Peel et al. 2007, Kottke et al. 2006, Rubel et al. 2017, Cui et al. 2021)

| 1st      | 2nd      | 3rd      | Description and criteria                                                                                                                                                        |
|----------|----------|----------|---------------------------------------------------------------------------------------------------------------------------------------------------------------------------------|
| <i>A</i> |          |          | <b>Equatorial/tropical</b> — $\text{MTCM} \geq 18\text{ }^{\circ}\text{C}$                                                                                                      |
|          | <i>f</i> |          | Rainforest, fully humid— $\text{P}_{\text{dry}} \geq 60\text{ mm}$                                                                                                              |
|          | <i>m</i> |          | Monsoonal—not <i>Af</i> & $\text{P}_{\text{dry}} \geq 100 - \text{MAP}/25$                                                                                                      |
|          | <i>s</i> |          | Savannah with dry summer— $\text{P}_{\text{sdry}} < 60\text{ mm}$                                                                                                               |
|          | <i>w</i> |          | Savannah with dry winter— $\text{P}_{\text{wdry}} < 60\text{ mm}$                                                                                                               |
| <i>B</i> |          |          | <b>Arid</b> — $\text{MAP} < 10 \times \text{P}_{\text{threshold}}$                                                                                                              |
|          | <i>W</i> |          | Desert— $\text{MAP} < 5 \times \text{P}_{\text{threshold}}$                                                                                                                     |
|          | <i>S</i> |          | Steppe— $\text{MAP} \geq 5 \times \text{P}_{\text{threshold}}$                                                                                                                  |
|          |          | <i>h</i> | Hot arid— $\text{MAT} \geq 18\text{ }^{\circ}\text{C}$                                                                                                                          |
|          |          | <i>k</i> | Cold arid— $\text{MAT} < 18\text{ }^{\circ}\text{C}$                                                                                                                            |
| <i>C</i> |          |          | <b>Warm temperate</b> (subtropical to temperate)— $\text{T}_{\text{hot}} > 10\text{ }^{\circ}\text{C}$ & $0\text{ }^{\circ}\text{C} < \text{MTCM} < 18\text{ }^{\circ}\text{C}$ |
| <i>D</i> |          |          | <b>Snow</b> (cold-temperate to boreal)— $\text{T}_{\text{hot}} > 10\text{ }^{\circ}\text{C}$ & $\text{MTCM} \leq 0\text{ }^{\circ}\text{C}$                                     |
|          | <i>s</i> |          | Summer dry— $\text{P}_{\text{sdry}} < 40\text{ mm}$ & $\text{P}_{\text{sdry}} < \text{P}_{\text{wwet}}/3$                                                                       |
|          | <i>w</i> |          | Winter dry— $\text{P}_{\text{wdry}} < \text{P}_{\text{swet}}/10$                                                                                                                |
|          | <i>f</i> |          | Fully humid, without a dry season, i.e. not <i>s</i> or <i>w</i>                                                                                                                |
|          |          | <i>a</i> | Hot summer— $\text{T}_{\text{hot}} \geq 22\text{ }^{\circ}\text{C}$                                                                                                             |
|          |          | <i>b</i> | Warm summer—not <i>a</i> & $\text{T}_{\text{mon10}} \geq 4$                                                                                                                     |
|          |          | <i>c</i> | Cool/cold and short summer—not <i>a/b</i> & $1 \leq \text{T}_{\text{mon10}} < 4$                                                                                                |
|          |          | <i>d</i> | Extremely continental: cold/very short or no summer & very cold winter—not <i>a/b</i> & $\text{MTCM} < -38\text{ }^{\circ}\text{C}$                                             |
| <i>E</i> |          |          | <b>Polar</b> — $\text{T}_{\text{hot}} < 10\text{ }^{\circ}\text{C}$                                                                                                             |
|          | <i>T</i> |          | Tundra—( $\text{T}_{\text{hot}} > 0$ )                                                                                                                                          |
|          | <i>F</i> |          | Ice, permanent frost ('frost desert')—( $\text{T}_{\text{hot}} \leq 0$ )                                                                                                        |

MAP = mean annual precipitation, MAT = mean annual temperature,  $\text{T}_{\text{hot}}$  = mean temperature of the hottest month,  $\text{T}_{\text{cold}}$  = mean temperature of the coldest month,  $\text{T}_{\text{mon10}}$  = number of months where the temperature is above  $10\text{ }^{\circ}\text{C}$ ,  $\text{P}_{\text{dry}}$  = precipitation of the driest month,  $\text{P}_{\text{sdry}}$  = precipitation of the driest month in summer,  $\text{P}_{\text{wdry}}$  = precipitation of the driest month in winter,  $\text{P}_{\text{swet}}$  = precipitation of the wettest month in summer,  $\text{P}_{\text{wwet}}$  = precipitation of the wettest month in winter,  $\text{P}_{\text{threshold}}$  = varies according to the following rules: if 70% of MAP occurs in winter then  $\text{P}_{\text{threshold}} = 2 \times \text{MAT}$ , if 70% of MAP occurs in summer then  $\text{P}_{\text{threshold}} = 2 \times \text{MAT} + 28$ , otherwise  $\text{P}_{\text{threshold}} = 2 \times \text{MAT} + 14$ . Summer (winter) is defined as the warmer (cooler) six months period of October to March and April to September.

## 2. Köppen-Geiger climate map colour coding

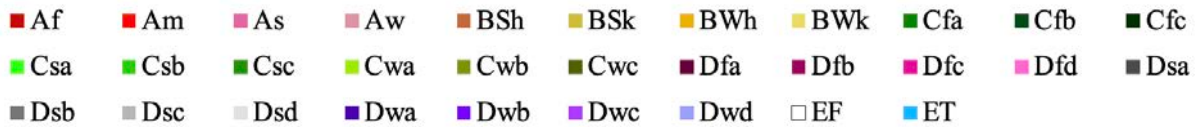

## 3. Phylogenetic relationships within Hydrocharitaceae from Chen et al. (2012, fig. 1)

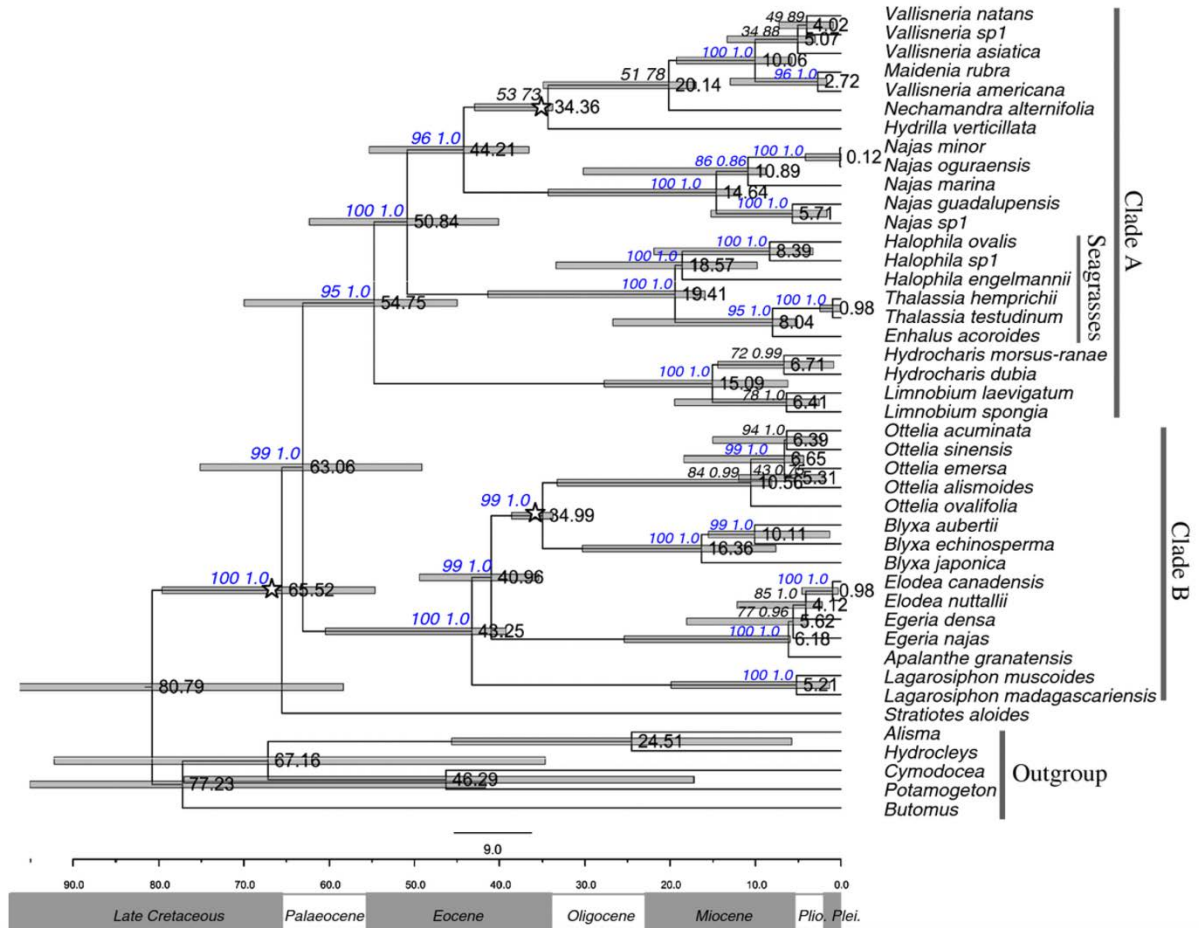

#### 4. 1. Summarized Hydrocharitaceae genera Köppen profiles (incl. all Köppen climate types)

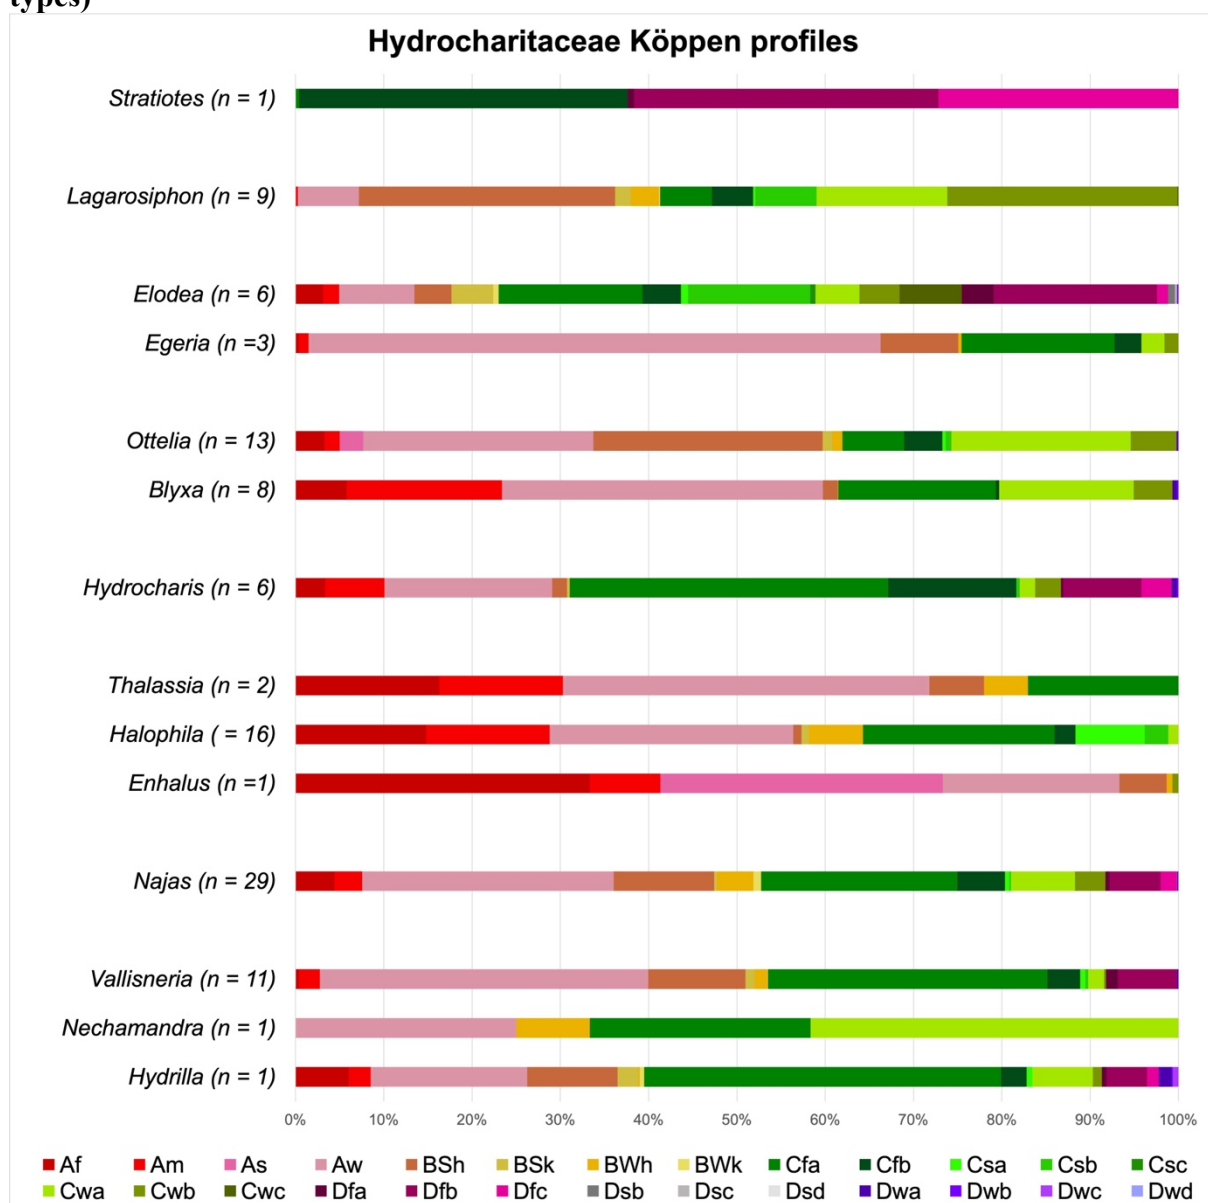

[illegible]

## 5. Hydrocharitaceae species Köppen Profiles

### 5.1. First diverging genus within Hydrocharitaceae cf. Chen et. al (2012)

#### 5.1.1. Genus *Stratiotes* L., 1753.

5.1.1.1. Köppen profile, distribution and climate map– GBIF all occurrences of *Stratiotes aloides* L. 1753; all localities (n = 28431), unique localities (n = 15341), herbarium specimens excluding duplicate occurrences (n = 820), other observations (n = 14537).

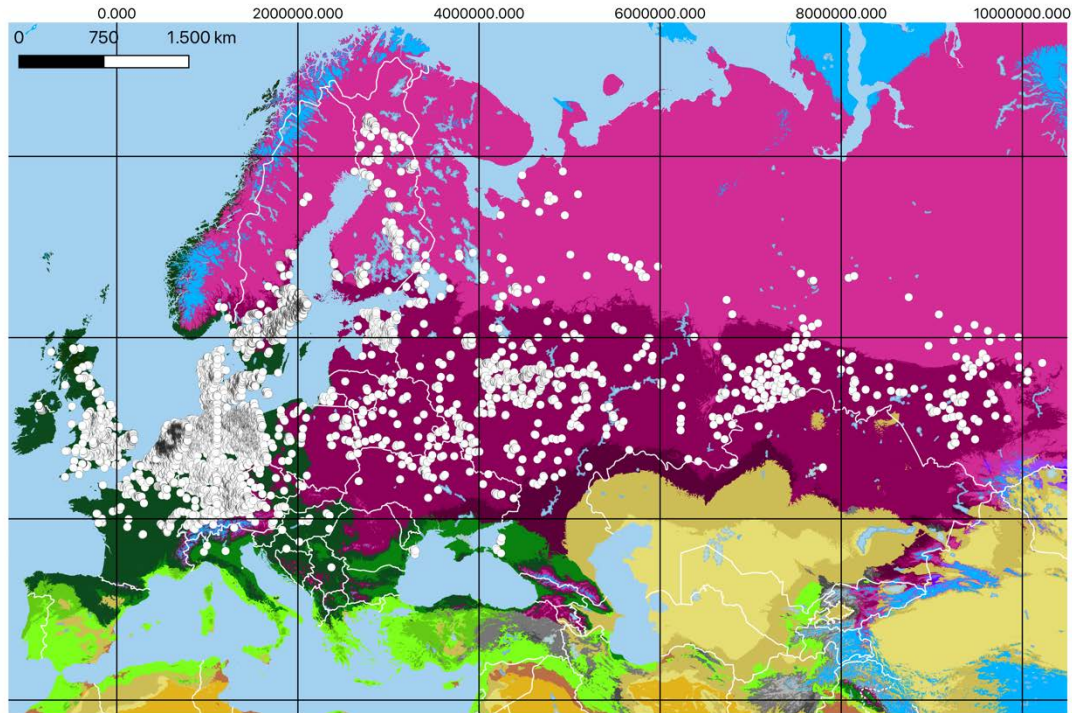

### Köppen profile of *Stratiotes aloides*

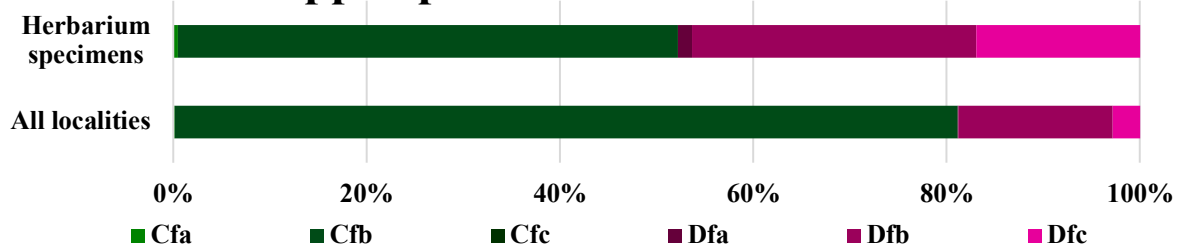

### Köppen profile of *Stratiotes aloides*

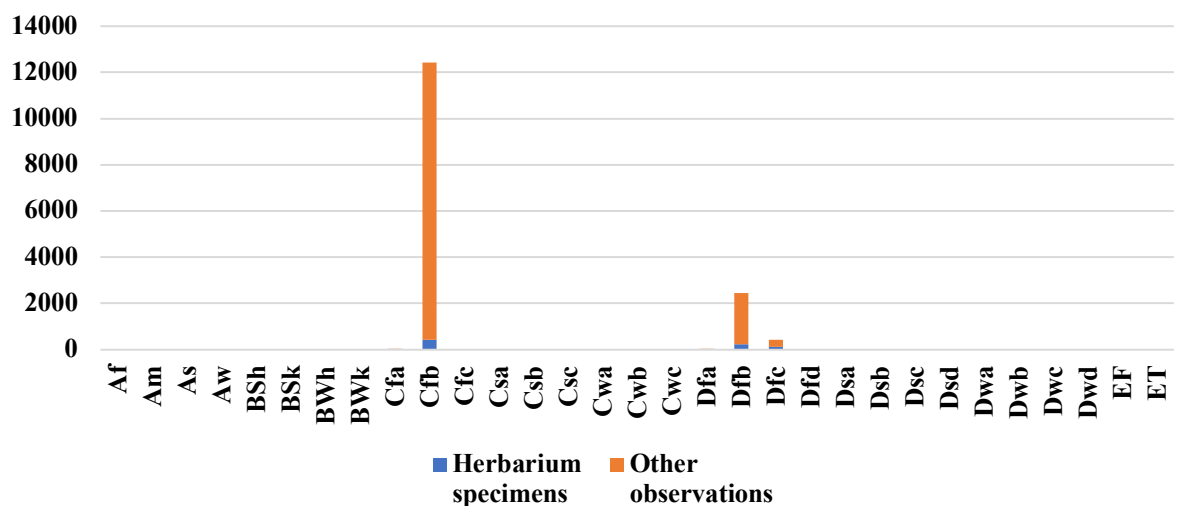

## 5.2 Clade B

**5.2.1. First diverging genera within Clade B of Hydrocharitaceae** cf. Chen et. al (2012), comprising *Lagarosiphon* Harv., 1841 and *Appertiella* C.D.K.Cook & Triest, 1982 (GBIF database did not contain data sets of *Appertiella* including geographic occurrence data).

### 5.2.1.1. Genus *Lagarosiphon* Harv., 1841

**Distribution and Köppen profiles for *Lagarosiphon*** incl. *L. cordofanus*, *L. hydrilloides*, *L. ilicifolius*, *L. madagascariensis*, *L. major*, *L. muscoides*, *L. rubellus*, *L. steudneri*, and *L. verticillifolius*, based on herbarium specimens (n = 445).

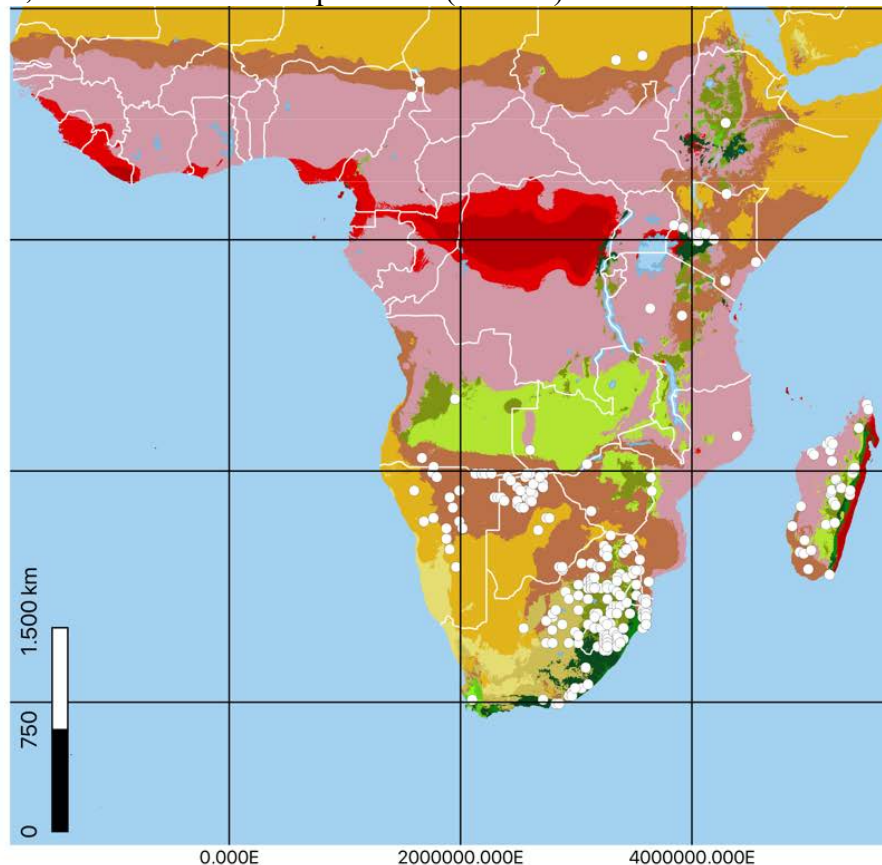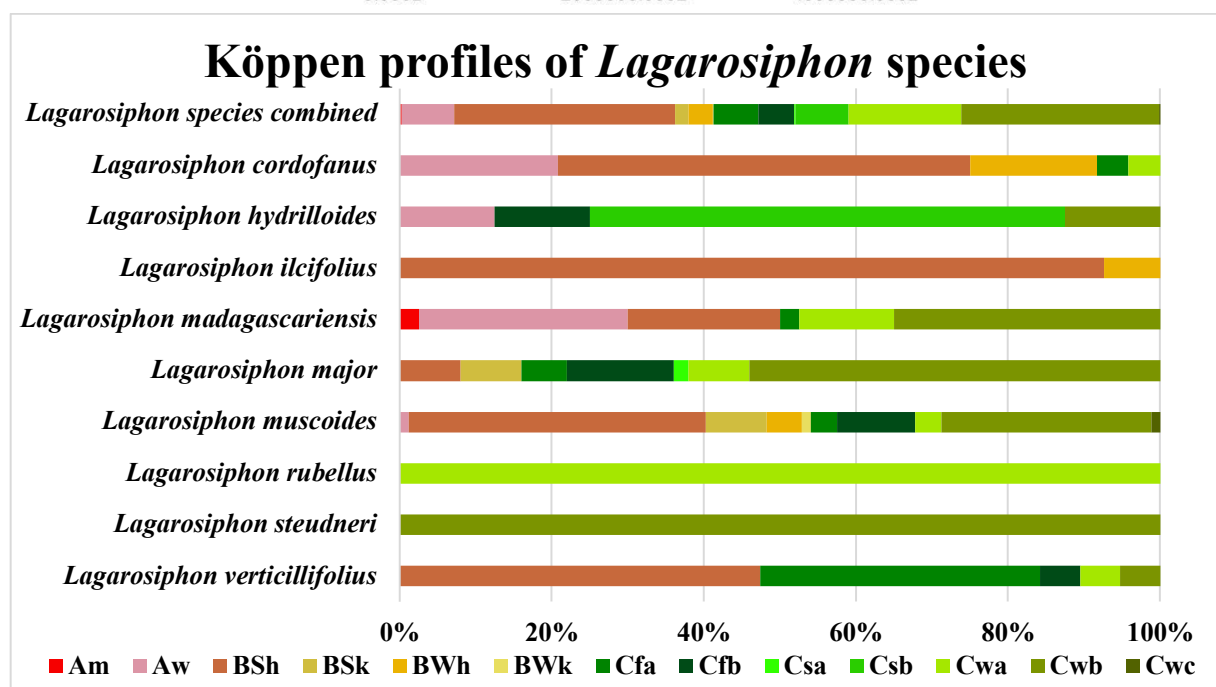

**5.2.1.1.1. Köppen profile, distribution and climate map**– GBIF occurrences of *Lagarosiphon cordofanus* Casp. 1858; herbarium specimens excluding duplicate occurrences (n = 24).

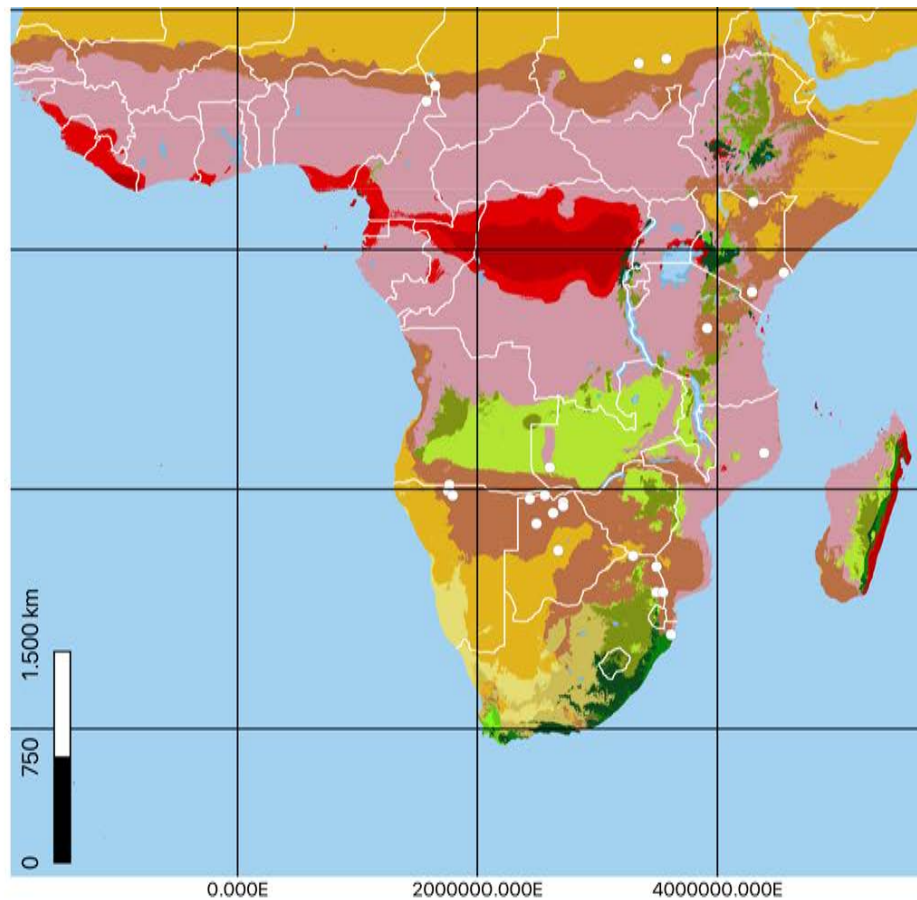

**Köppen profile of *Lagarosiphon cordofanus***

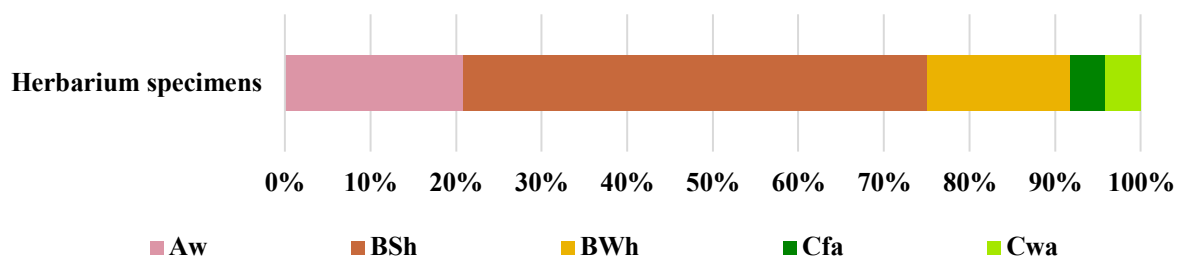

## Köppen signatures of *Lagarosiphon cordofanus*

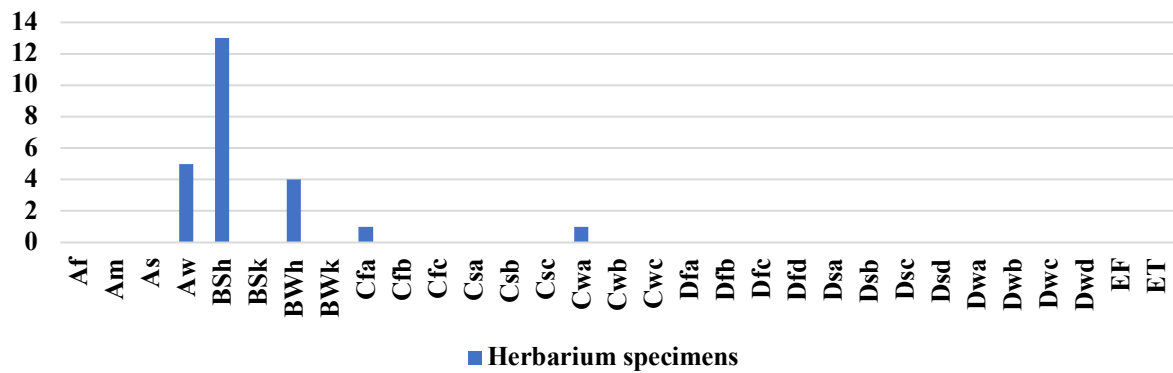

**5.2.1.1.2. Köppen profile, distribution and climate map**– GBIF occurrences of *Lagarosiphon hydrilloides* Rendle 1895; herbarium specimens excluding duplicate occurrences (n = 8).

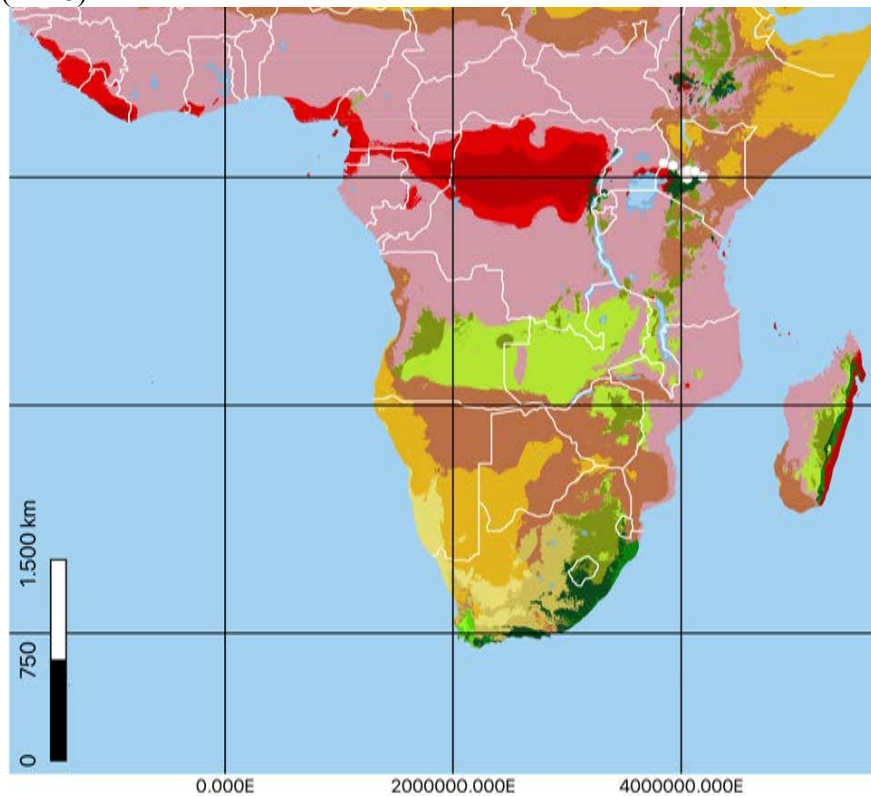

**Köppen profile of *Lagarosiphon hydrilloides***

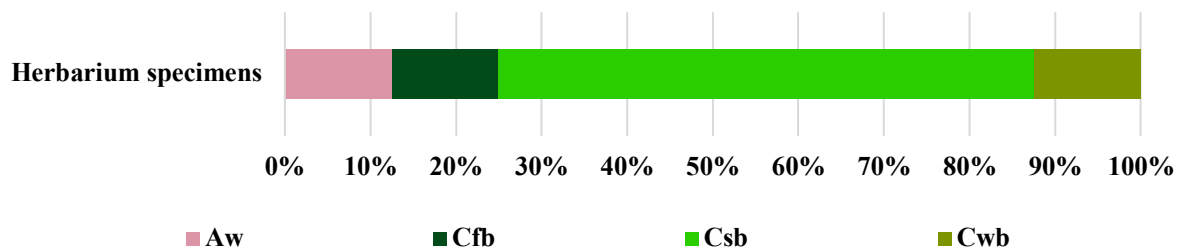

Köppen profile of *Lagarosiphon hydrilloides*

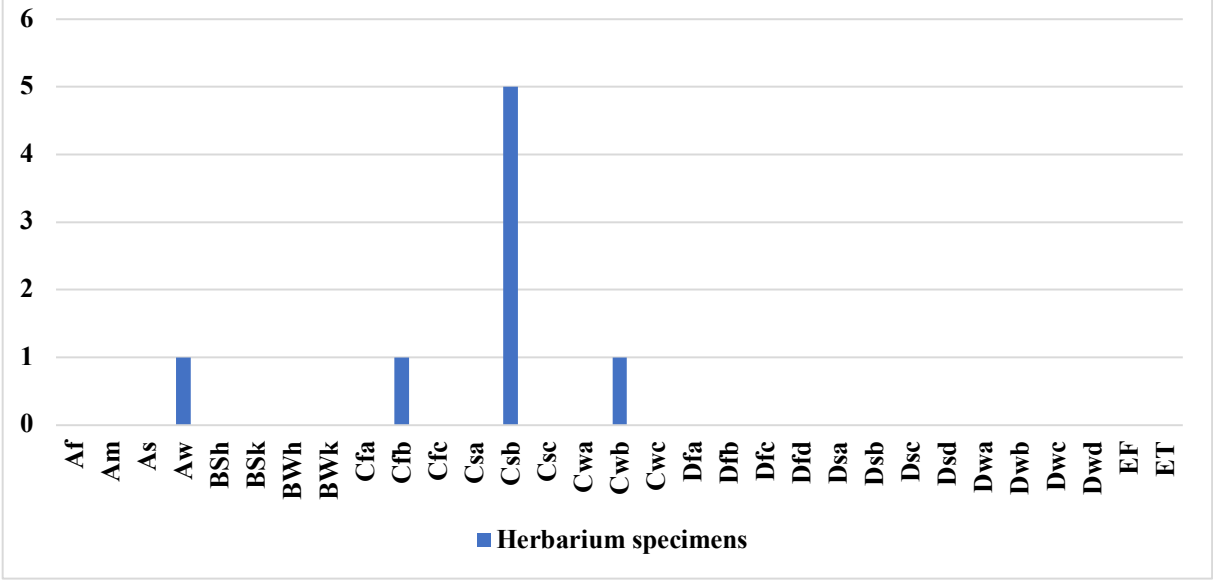

**5.2.1.1.3. Köppen profile, distribution and climate map**—GBIF occurrences of *Lagarosiphon ilicifolius* Oberm. 1964; herbarium specimens excluding duplicate occurrences (n = 27).

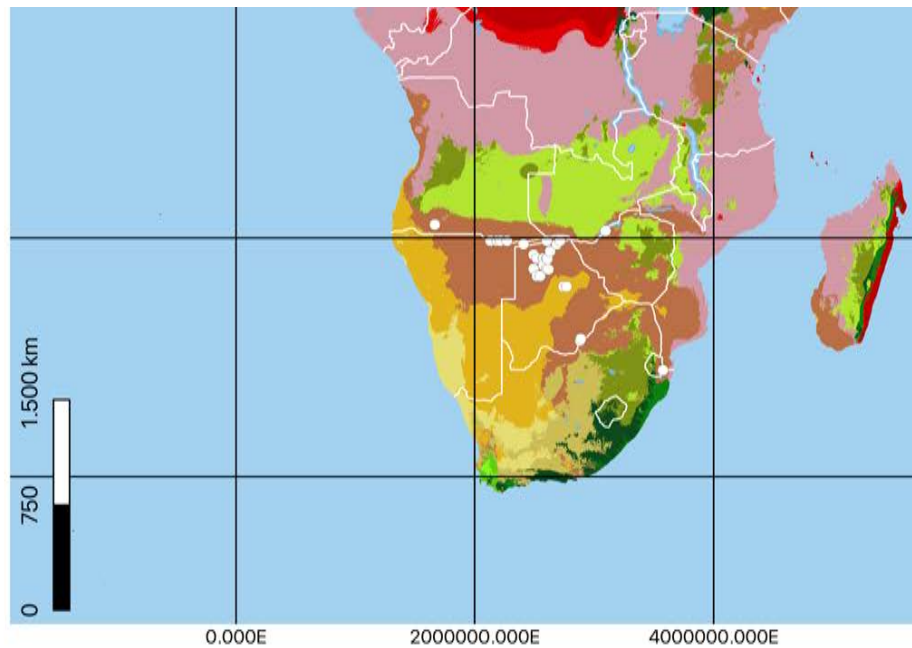

### Köppen profile of *Lagarosiphon ilicifolius*

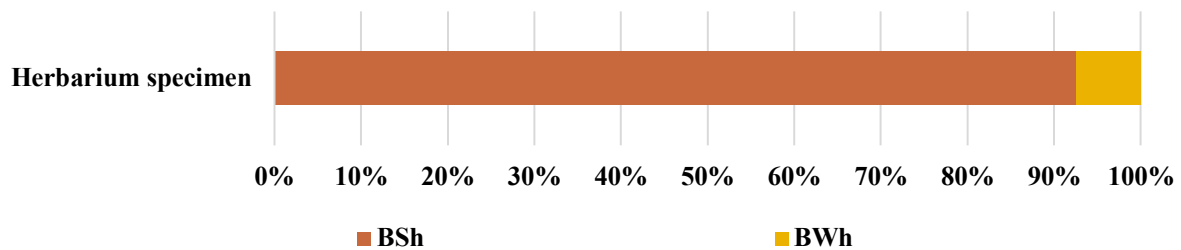

# Köppen profile of *Lagarosiphon ilicifolius*

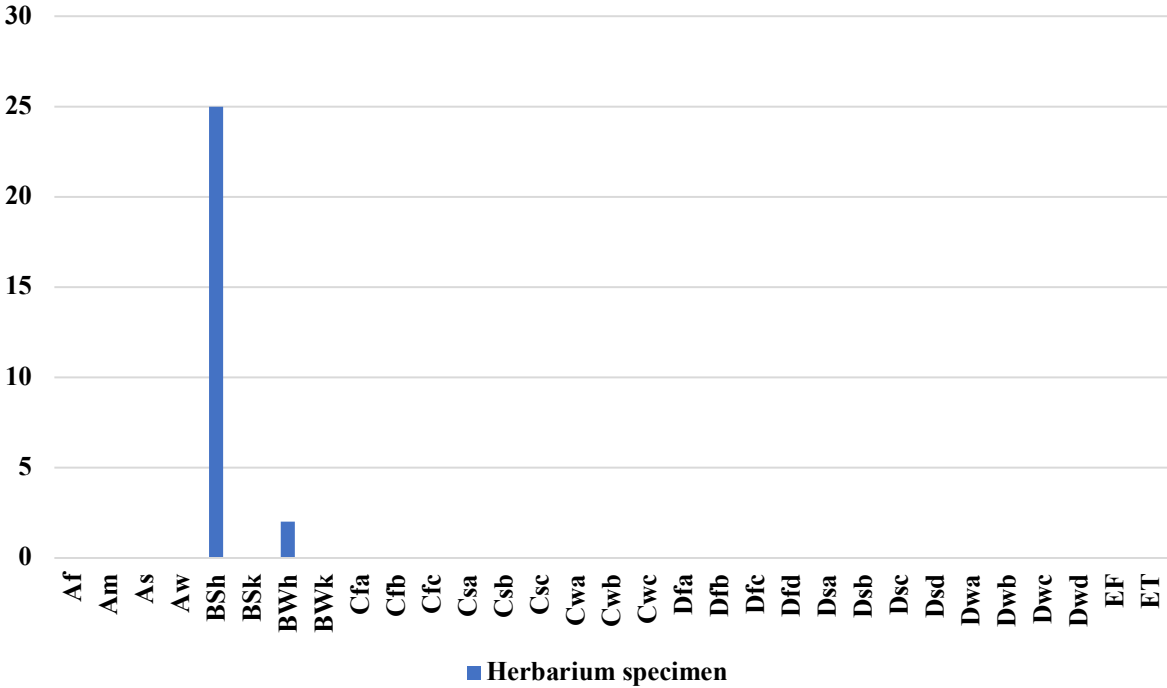

**5.2.1.1.3. Köppen profile, distribution and climate map**—GBIF occurrences of *Lagarosiphon madagascariensis* Harv. 1841; herbarium specimens excluding duplicate occurrences (n = 40).

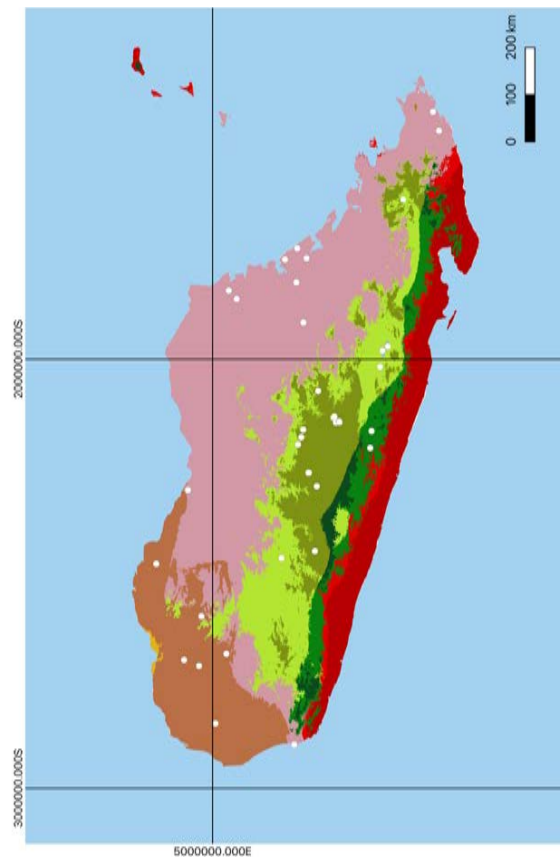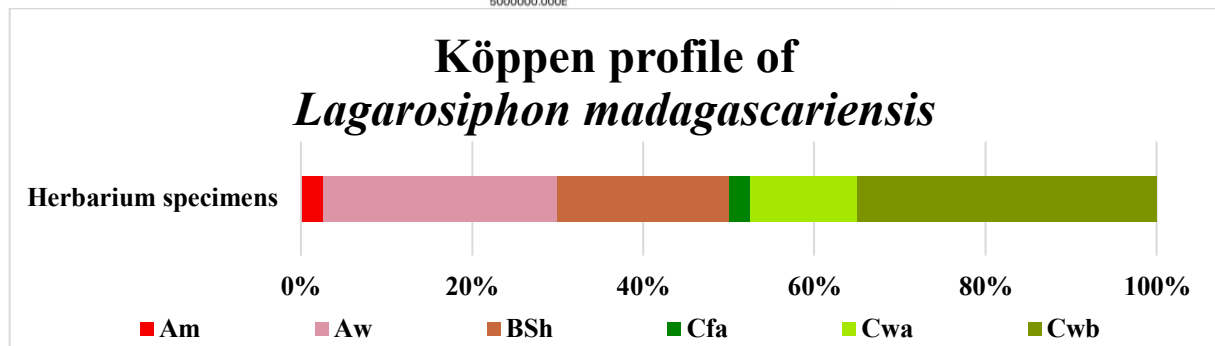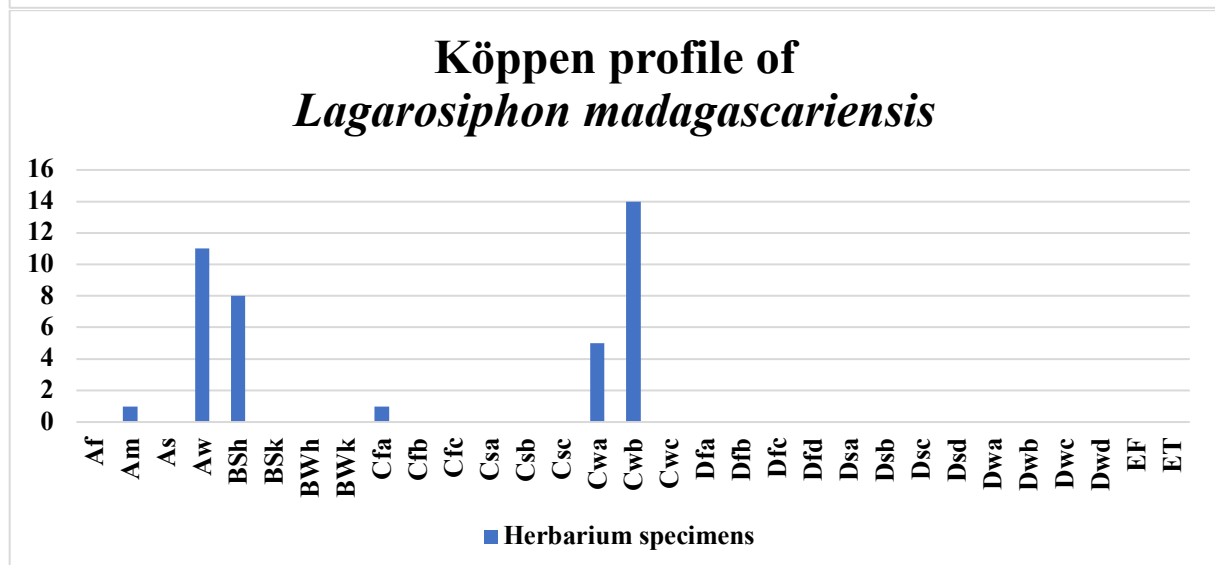

**5.2.1.1.4. Köppen profile, distribution and climate map**—GBIF occurrences of *Lagarosiphon major* (Ridl. 1886) Moss 1928; herbarium specimens excluding duplicate occurrences (n = 50).

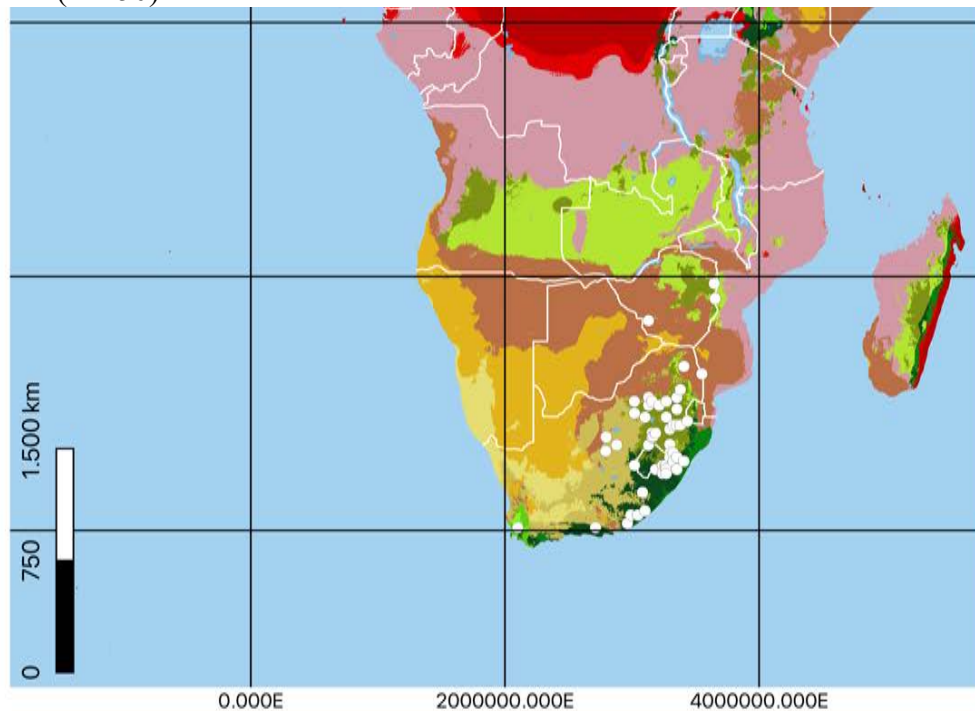

**Köppen profile of *Lagarosiphon major***

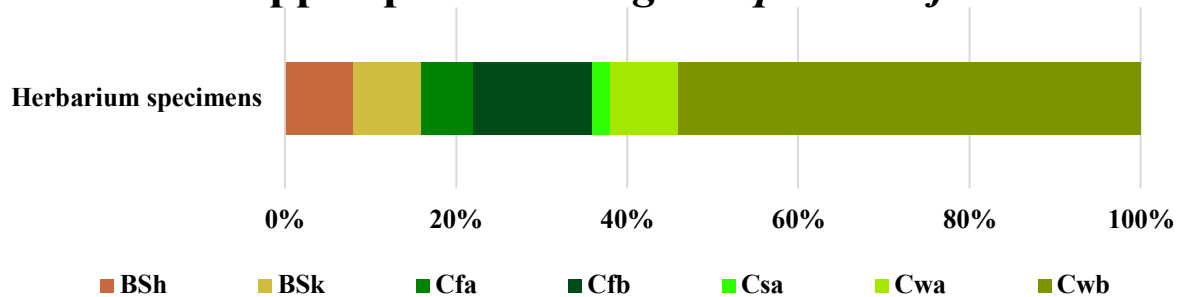

**Köppen profile of *Lagarosiphon major***

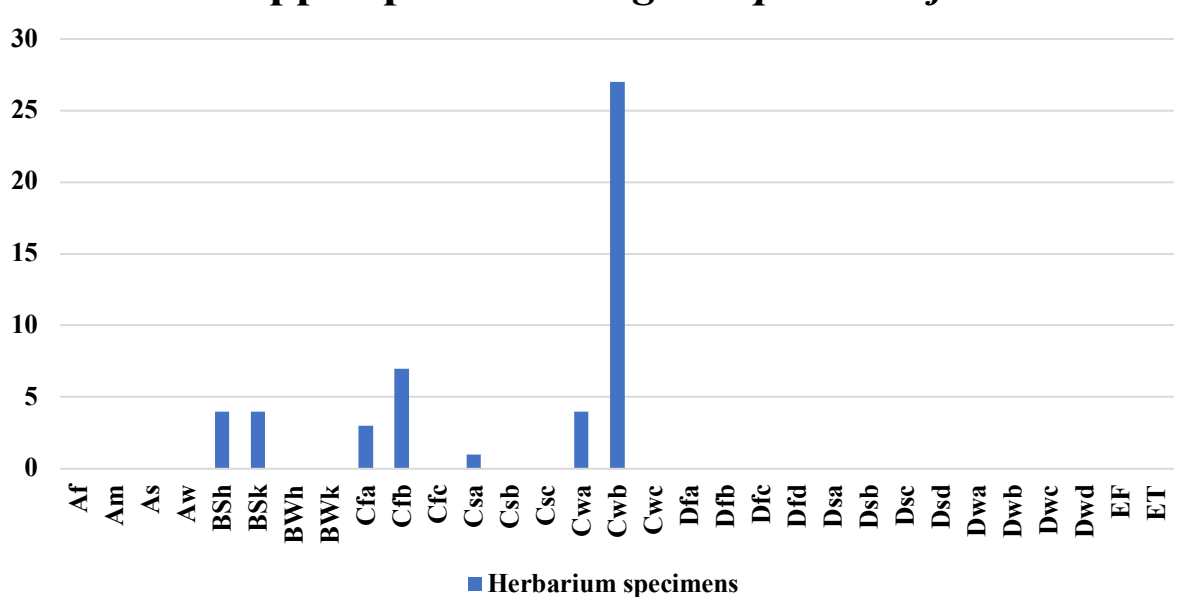

**5.2.1.1.5. Köppen profile, distribution and climate map**– GBIF occurrences of *Lagarosiphon muscoides* Harv. 1841; herbarium specimens excluding duplicate occurrences (n = 87).

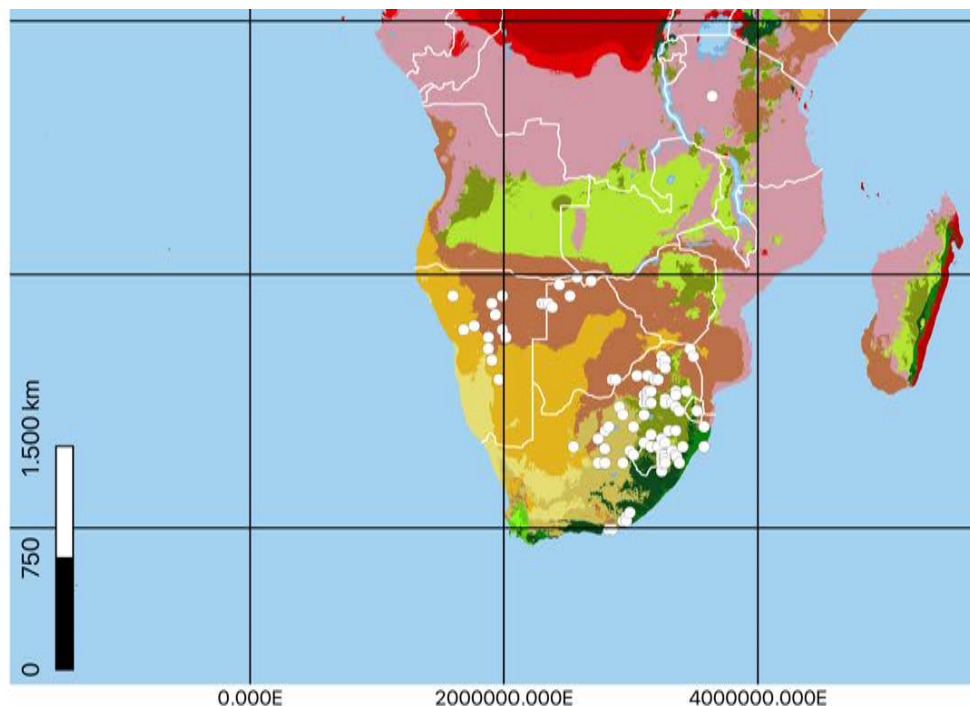

### Köppen profile of *Lagarosiphon muscoides*

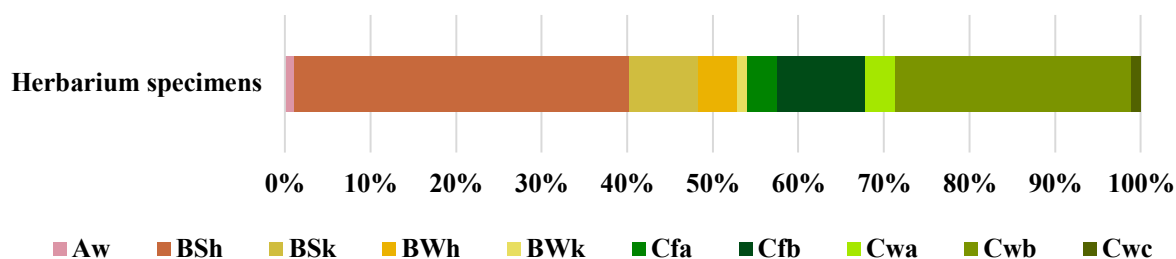

## Köppen profile of *Lagarosiphon muscoides*

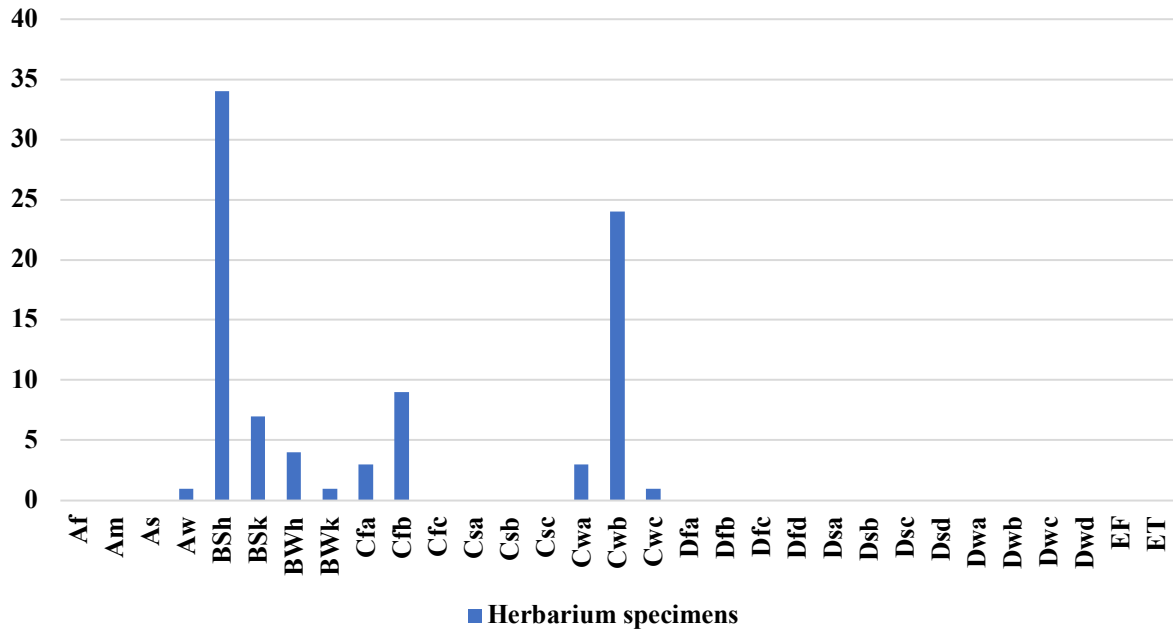

**5.2.1.1.6. Köppen profile, distribution and climate map**—GBIF occurrences of *Lagarosiphon rubellus* Ridl. 1886; herbarium specimens excluding duplicate occurrences (n = 1).

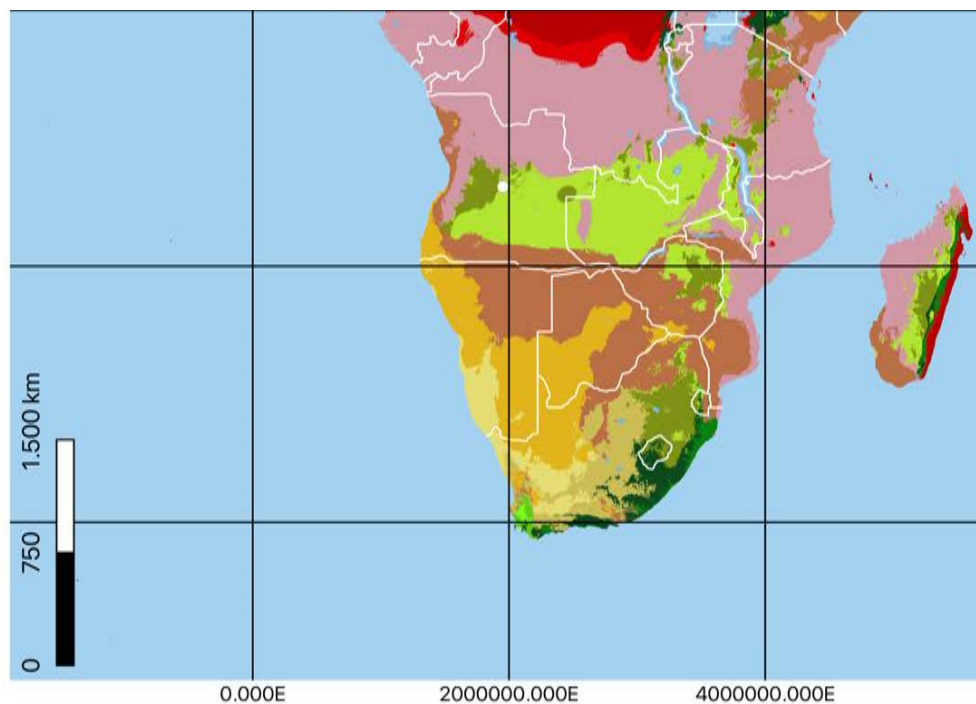

**Köppen profile of *Lagarosiphon muscoides***

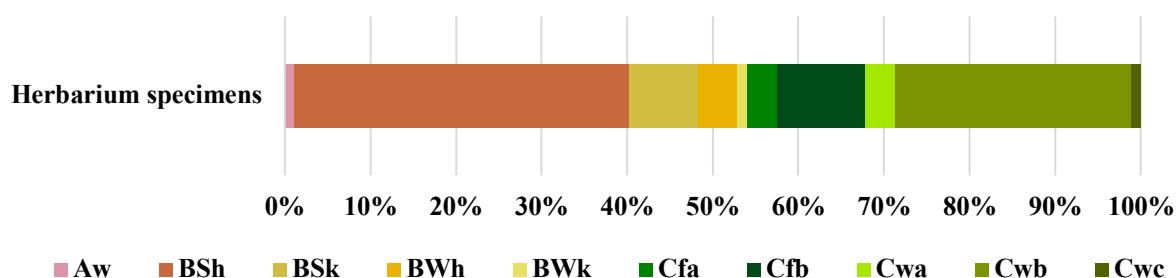

## Köppen profile of *Lagarosiphon muscoides*

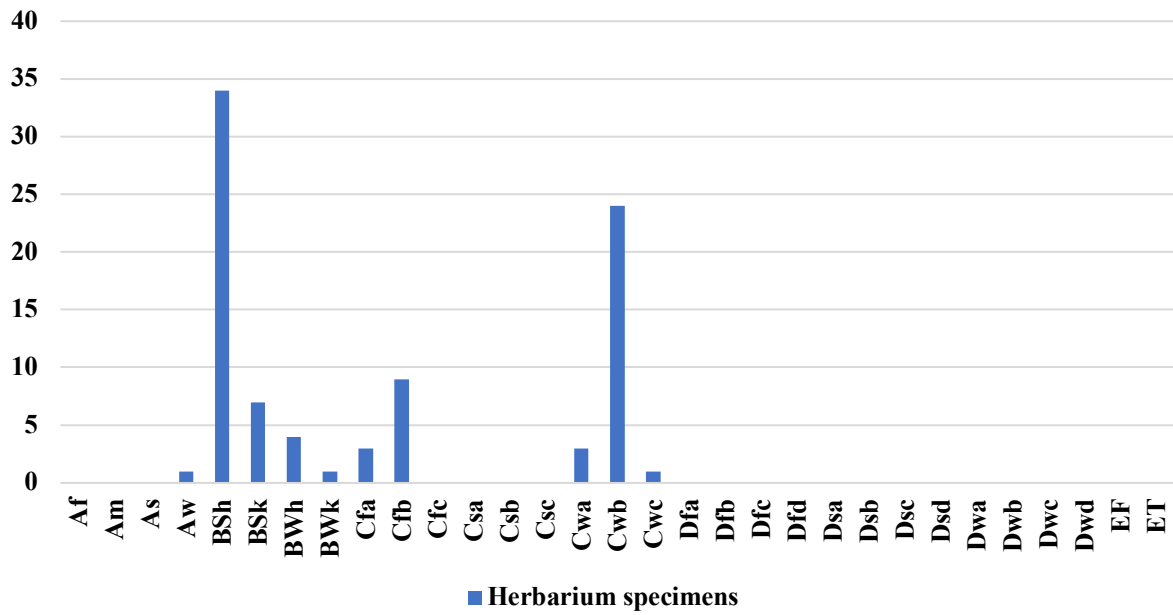

**5.2.1.1.6. Köppen profile, distribution and climate map**– GBIF occurrences of *Lagarosiphon steudneri* Casp. 1858; herbarium specimens excluding duplicate occurrences (n = 1).

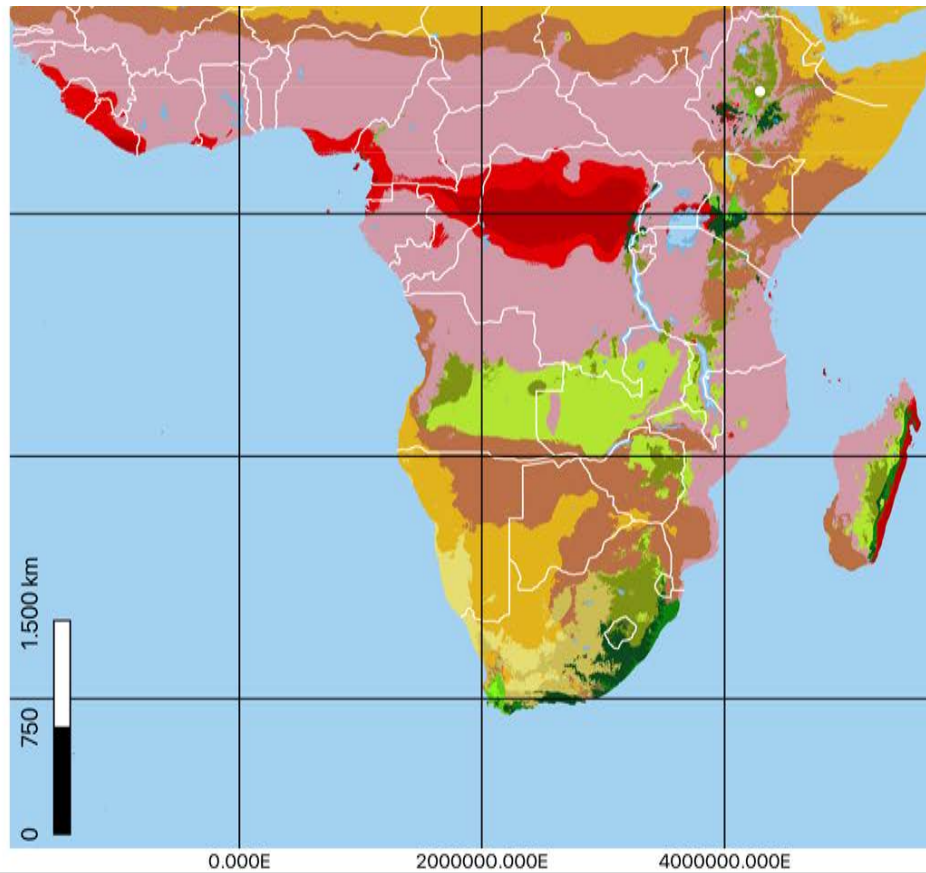

### Köppen profile of *Lagarosiphon steudneri*

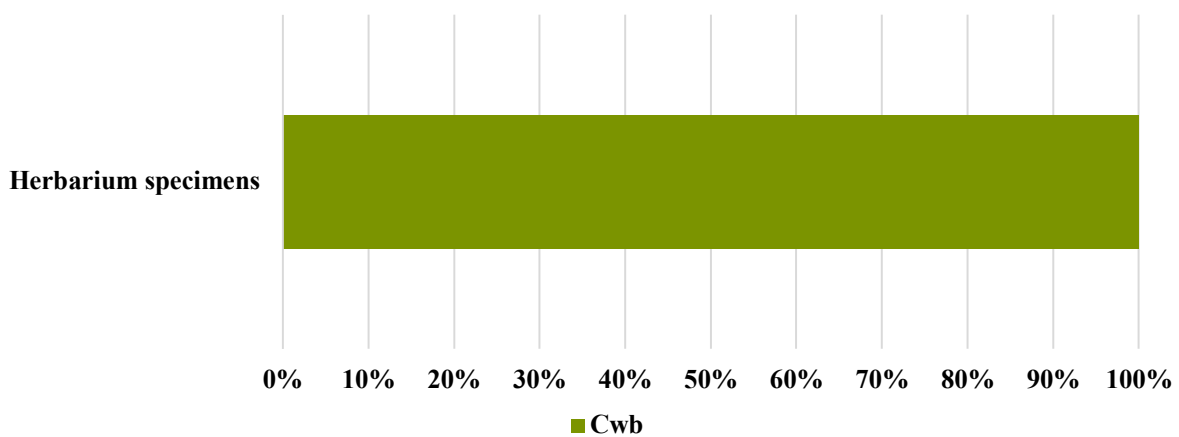

### Köppen signatures of *Lagarosiphon steudneri*

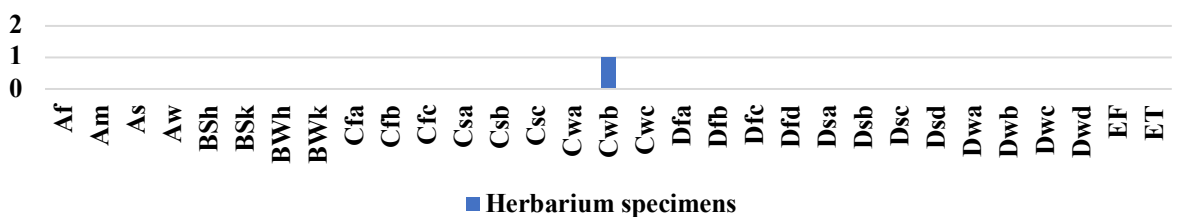

**5.2.1.1.6. Köppen profile, distribution and climate map–** GBIF occurrences of *Lagarosiphon verticillifolius* Oberm. 1964; herbarium specimens excluding duplicate occurrences (n = 19).

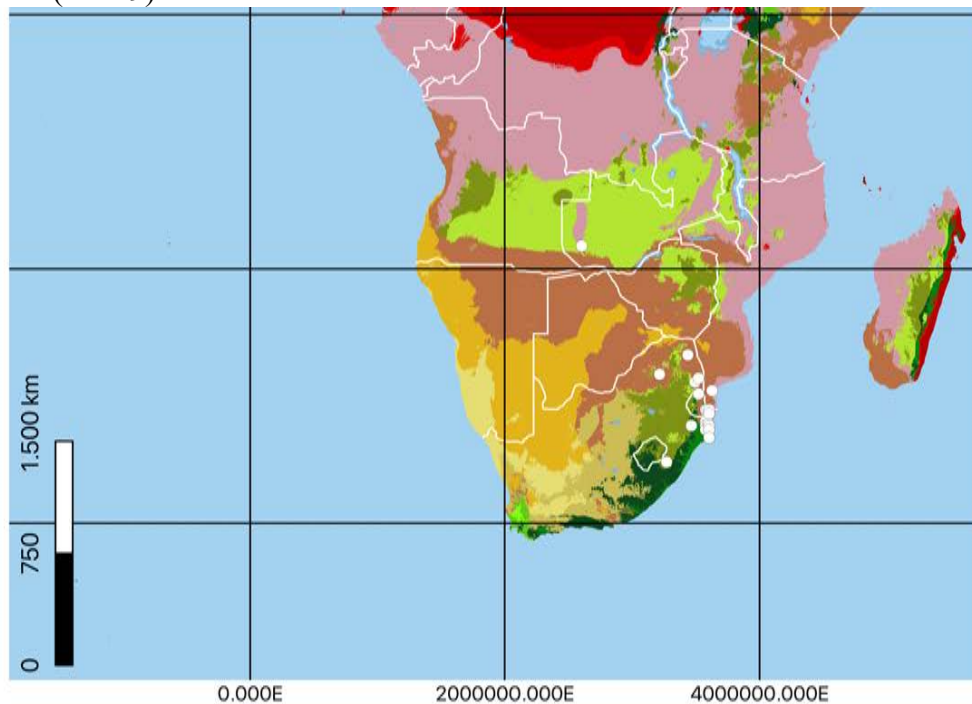

**Köppen profile of  
*Lagarosiphon verticillifolius***

Herbarium specimens

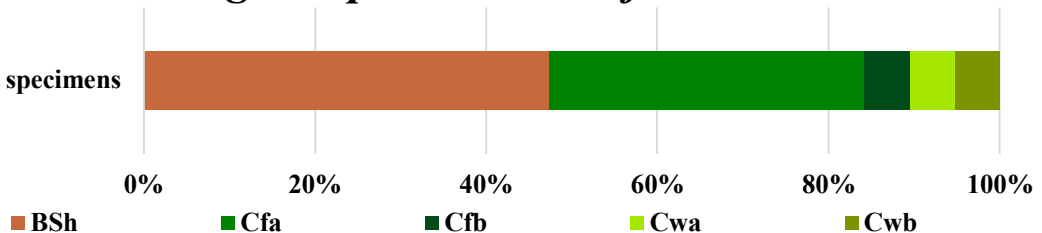

**Köppen profile of  
*Lagarosiphon verticillifolius***

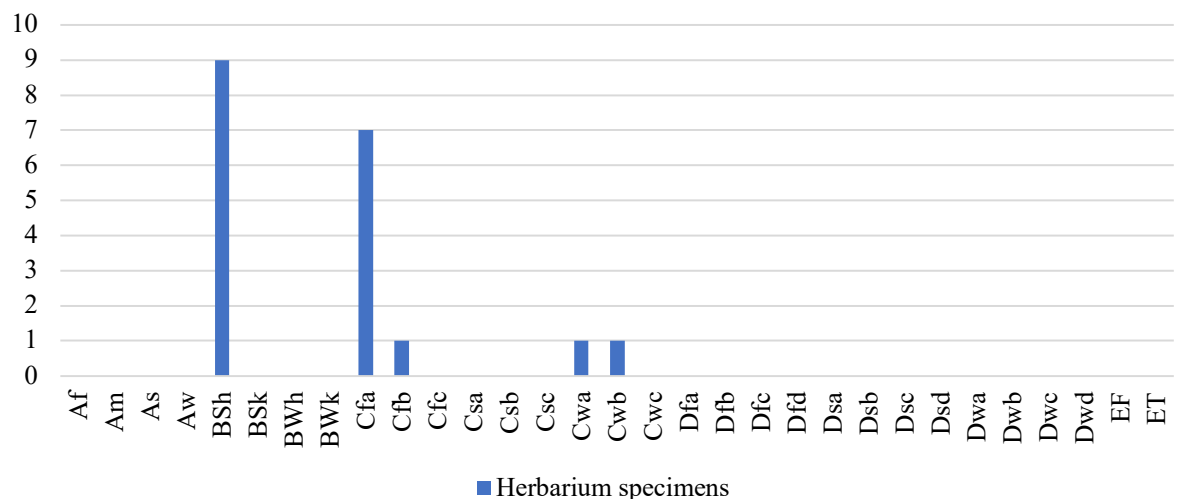

**5.2.2. Second diverging genera within Clade B of Hydrocharitaceae** cf. Chen et. al (2012), comprising *Egeria* Planch. 1849 and *Elodea* Michx. 1803 (native distribution)

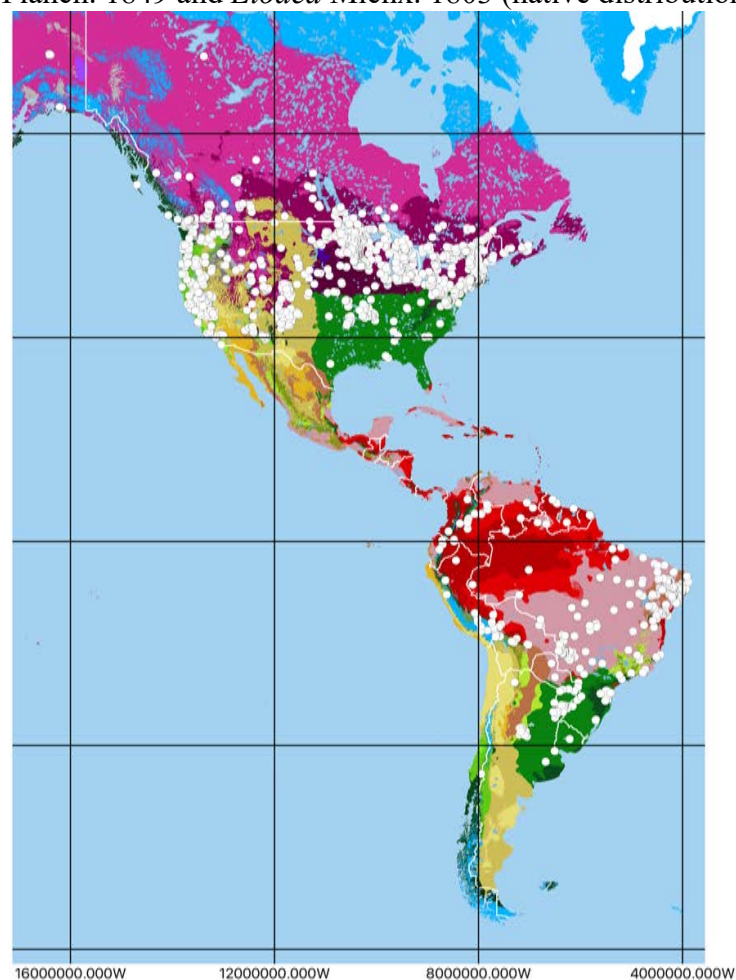

*Egeria* and *Elodea* preserved specimens, native and neophyte distribution.

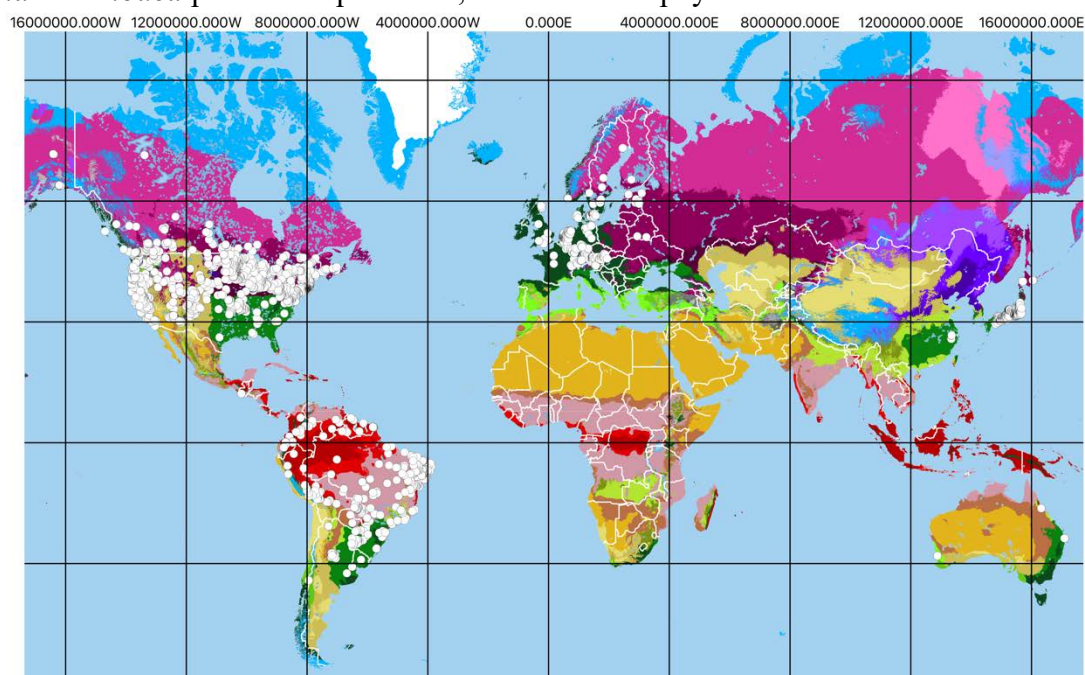

### 5.2.2.1 Genus *Egeria* Planch. 1849.

**Distribution and climate map and Köppen profiles for *Egeria* incl. *Egeria densa*, *E. heterostemon*, and *E. najas*, based on herbarium specimens excluding duplicate occurrences (n = 241).**

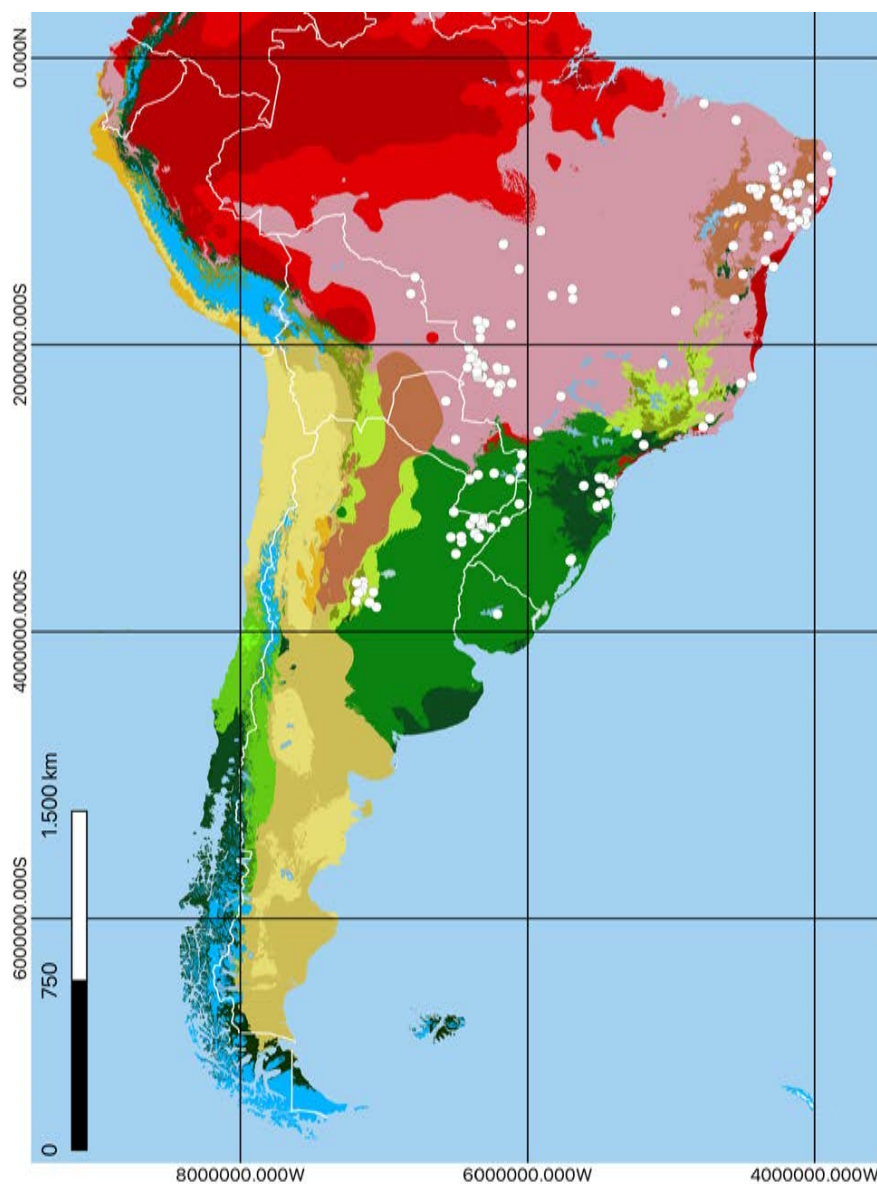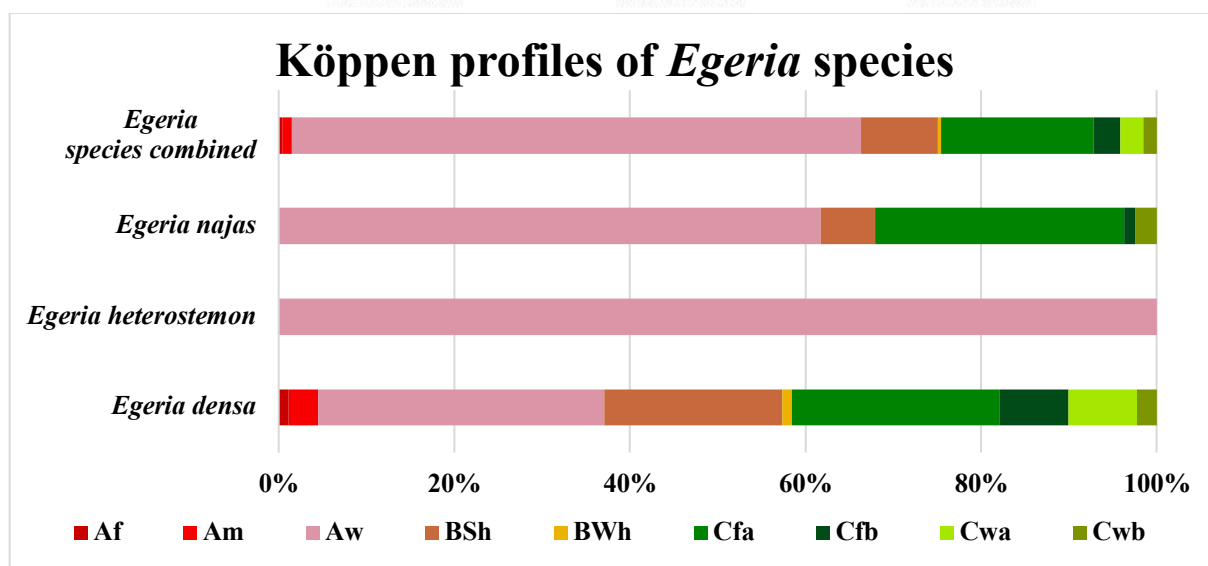

**5.2.2.1.1. Köppen profile, distribution and climate map**– GBIF occurrences of *Egeria densa* Planch. 1949; herbarium specimens excluding duplicate occurrences (n = 89).

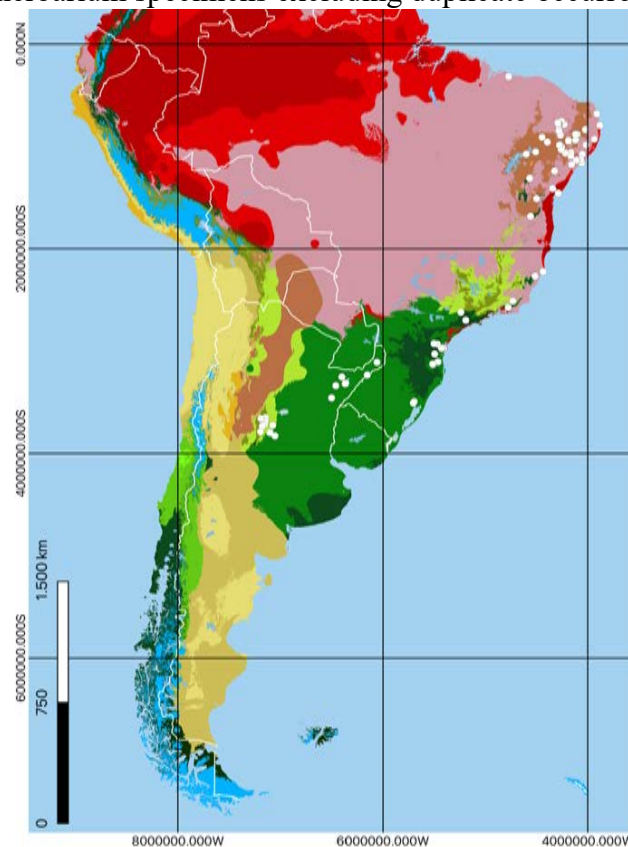

### Köppen profiles of *Egeria densa*

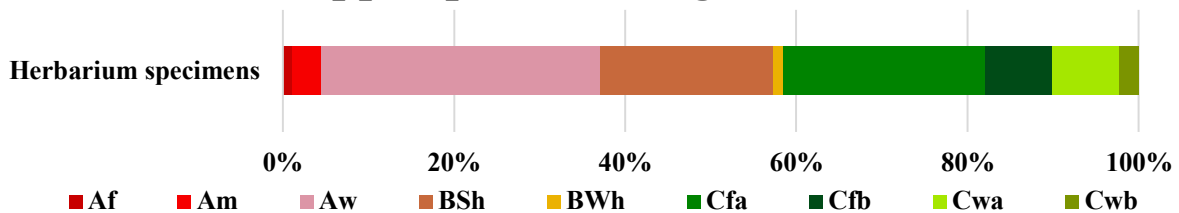

### Köppen profiles of *Egeria densa*

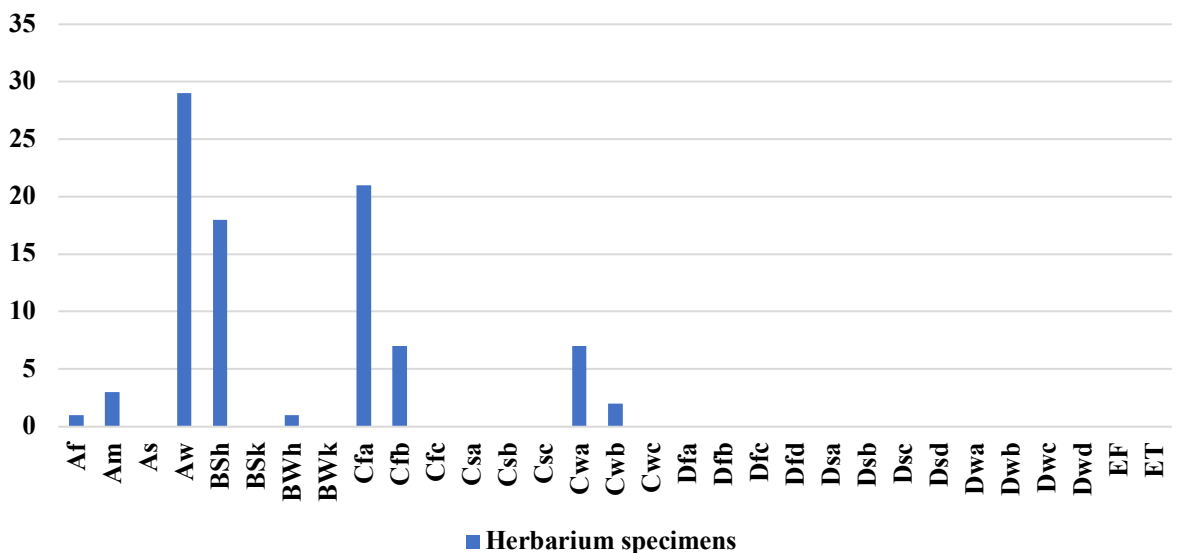

**5.2.2.1.2. Köppen profile, distribution and climate map**– GBIF occurrences of *Egeria heterostemon* S.Koehler & C.P.Bove 2001; herbarium specimens excluding duplicate occurrences (n = 2).

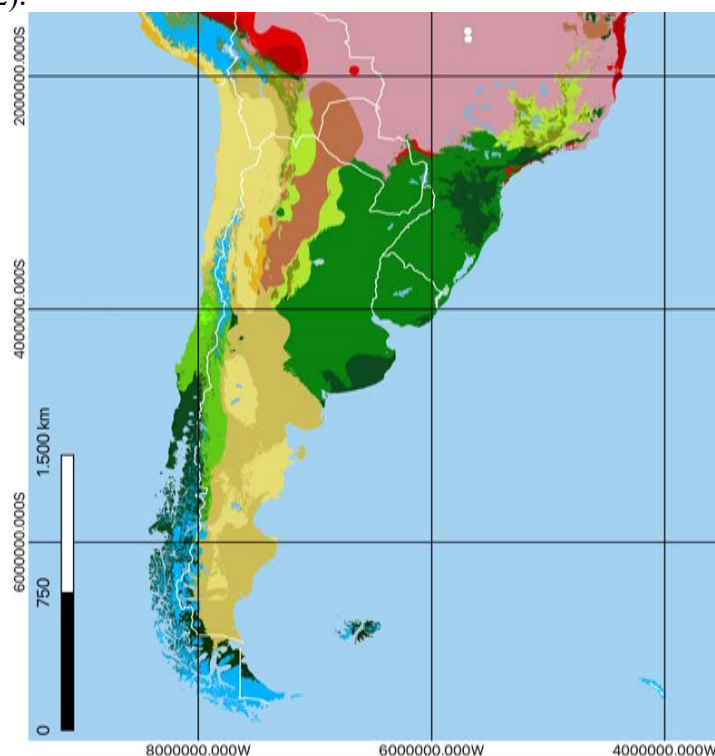

### Köppen signatures of *Egeria heterostemon*

Herbarium specimens

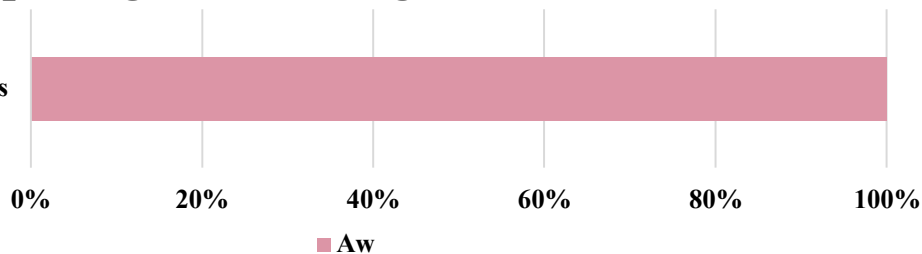

### Köppen signatures of *Egeria heterostemon*

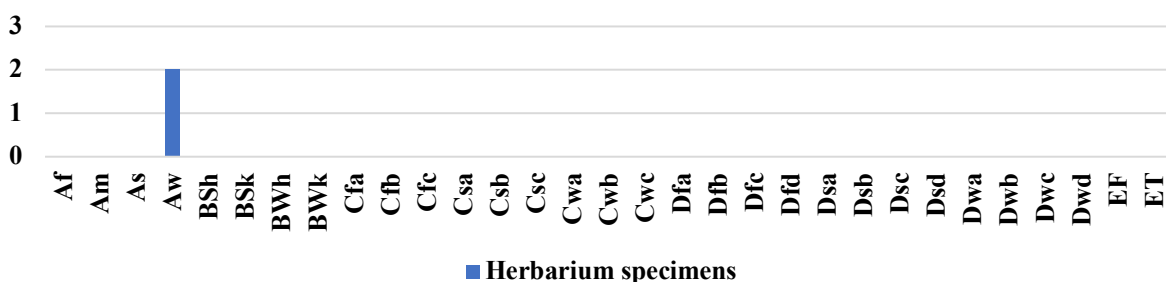

**5.2.2.1.3. Köppen profile, distribution and climate map**– GBIF occurrences of *Egeria najas* Planch. 1849; herbarium specimens excluding duplicate occurrences (n = 81).

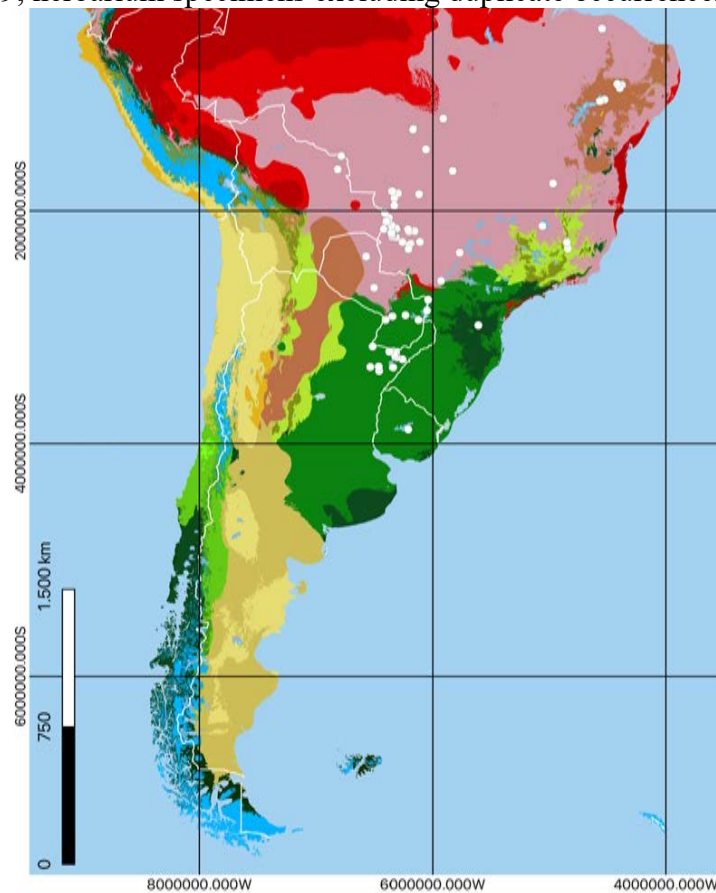

**Köppen profile of *Egeria najas***

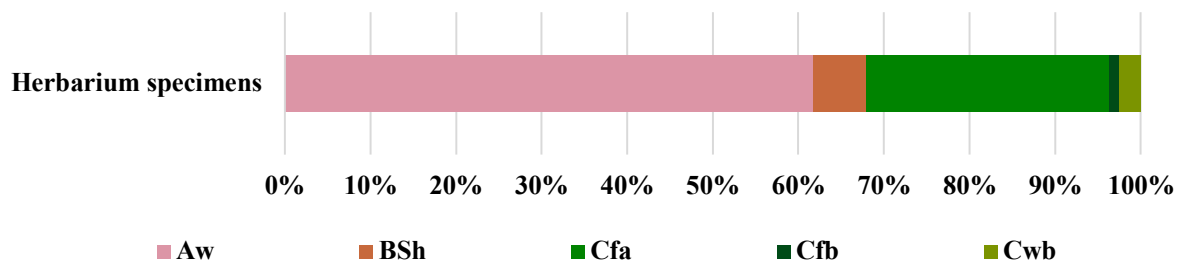

**Köppen profile of *Egeria najas***

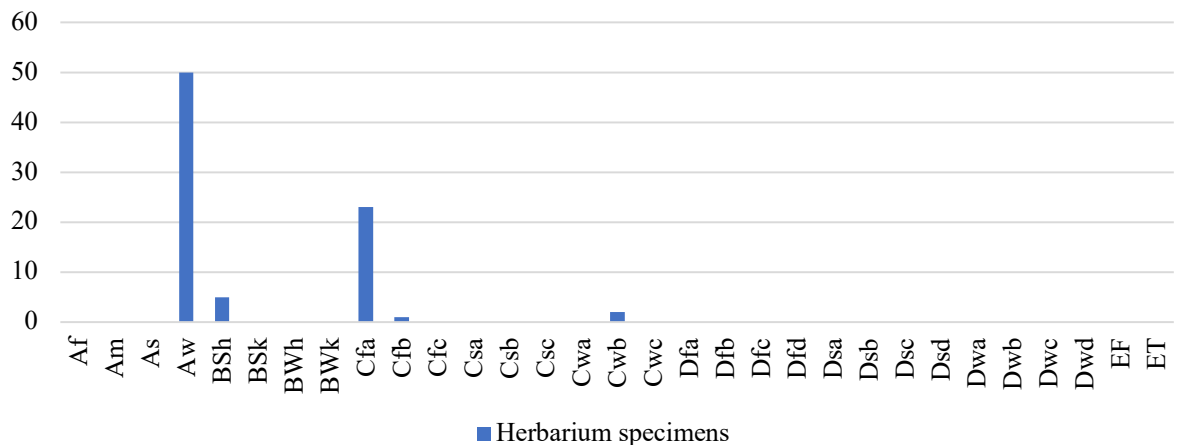

**Distribution and Köppen profiles of genus *Elodea*** incl. *E. bifoliata*, *E. callitrichoides*, *E. canadensis*, *E. granatensis*, *E. nuttalli*, and *E. potamogeton*, based on herbarium specimens (n = 2458).

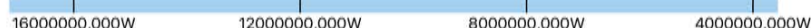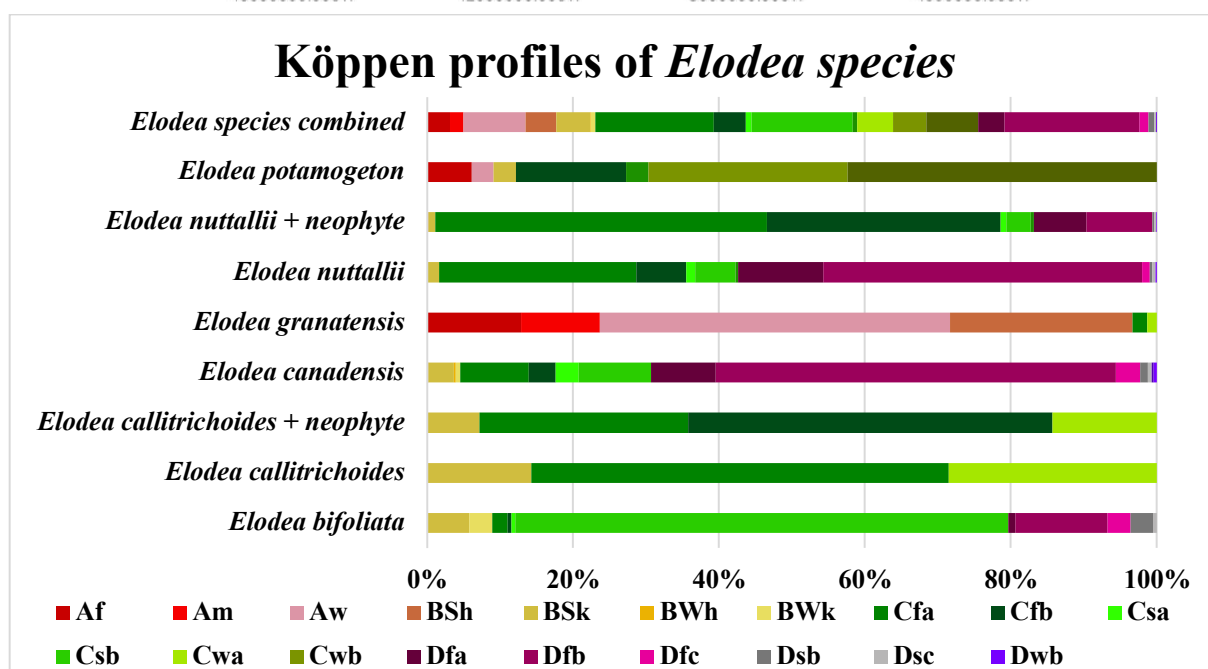

**5.2.2.2.1. Köppen profile, distribution and climate map**– GBIF occurrences of *Elodea bifoliata* H.St.John 1962; herbarium specimens excluding duplicate occurrences (n = 191).

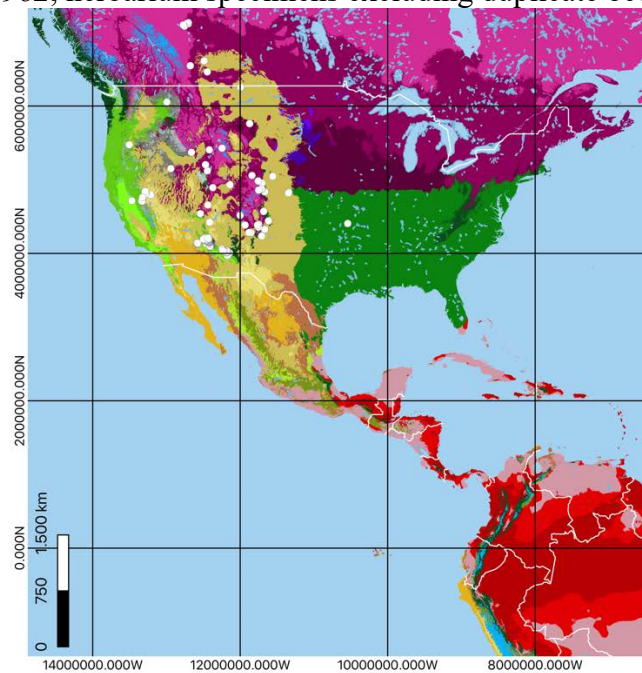

**Köppen profile of *Elodea bifoliata***

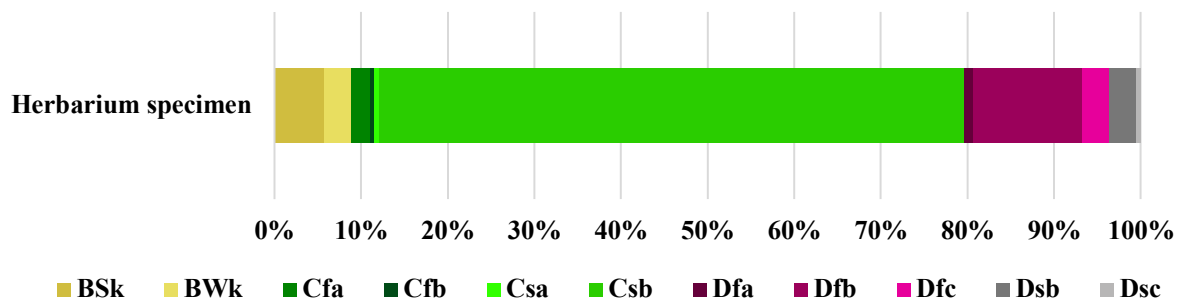

**Köppen profile of *Elodea bifoliata***

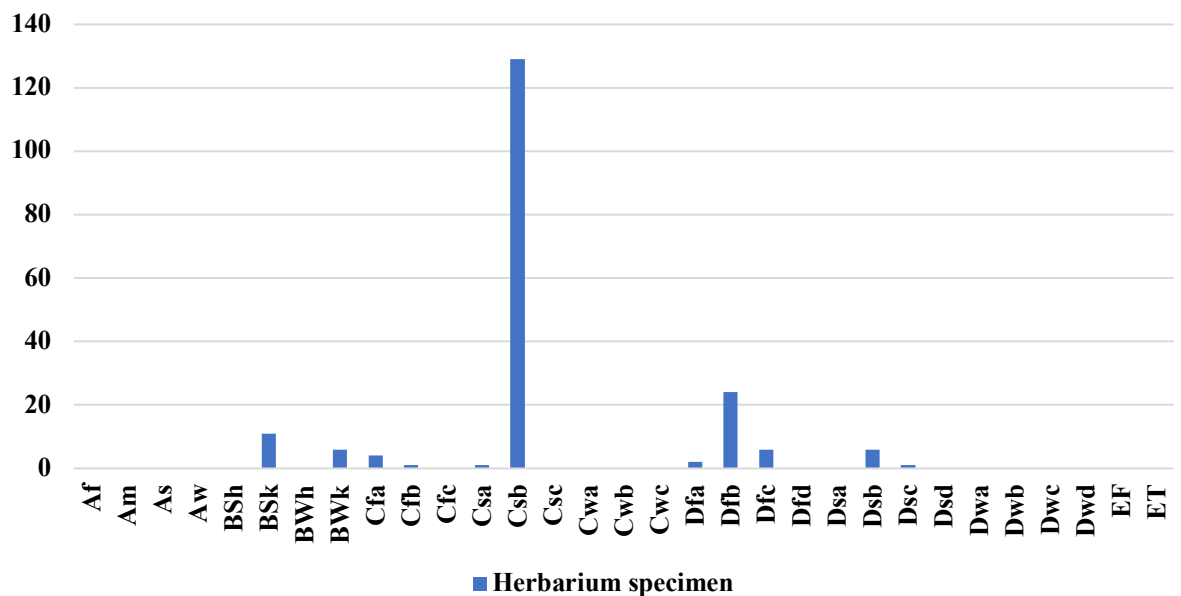

**5.2.2.2. Köppen profile, distribution and climate map**– GBIF occurrences of *Elodea callitrichoides* Casp. 1857, natural and neophyte distribution; herbarium specimen (n = 14).

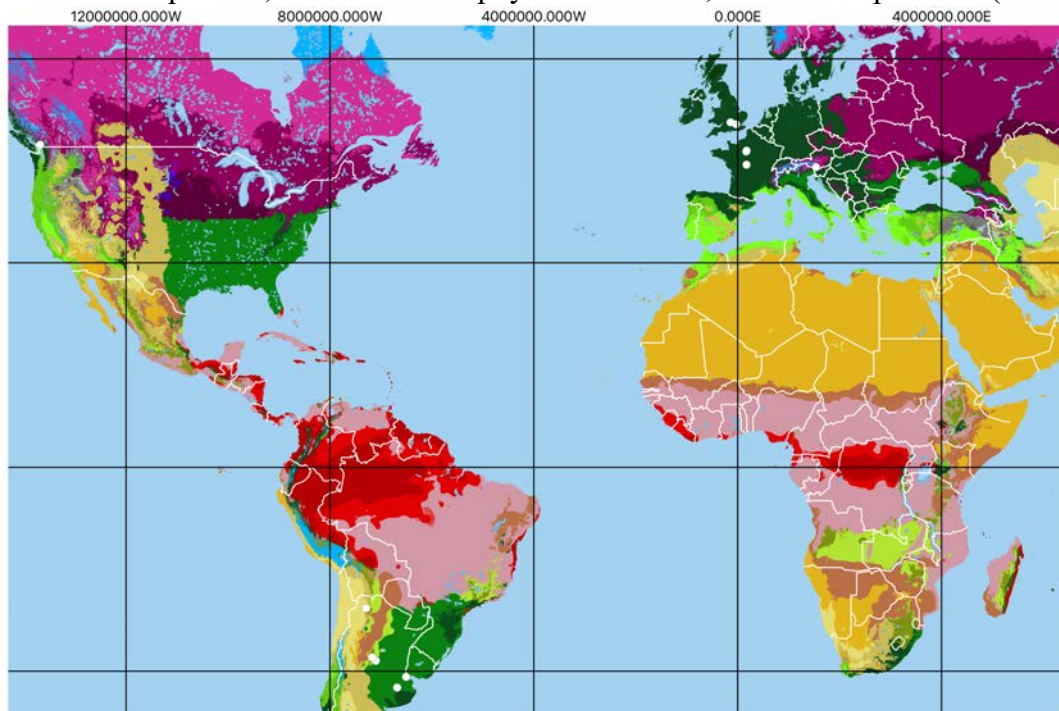

**Köppen profiles of *Elodea callitrichoides* (+ neophyte localities)**

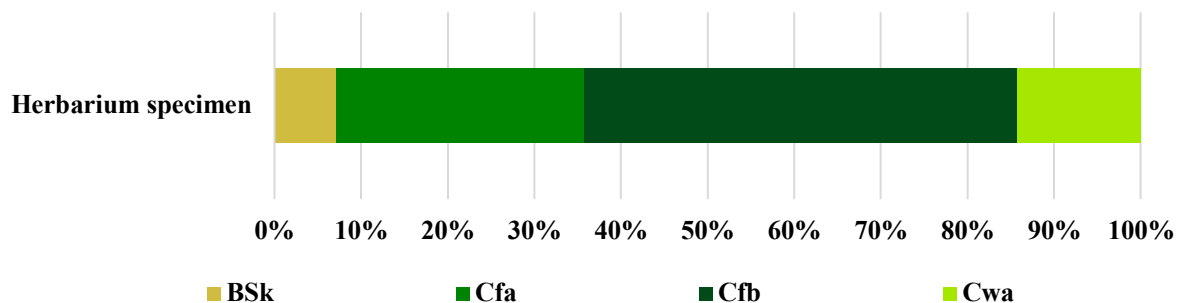

**Köppen profiles of *Elodea callitrichoides* (+ neophyte localities)**

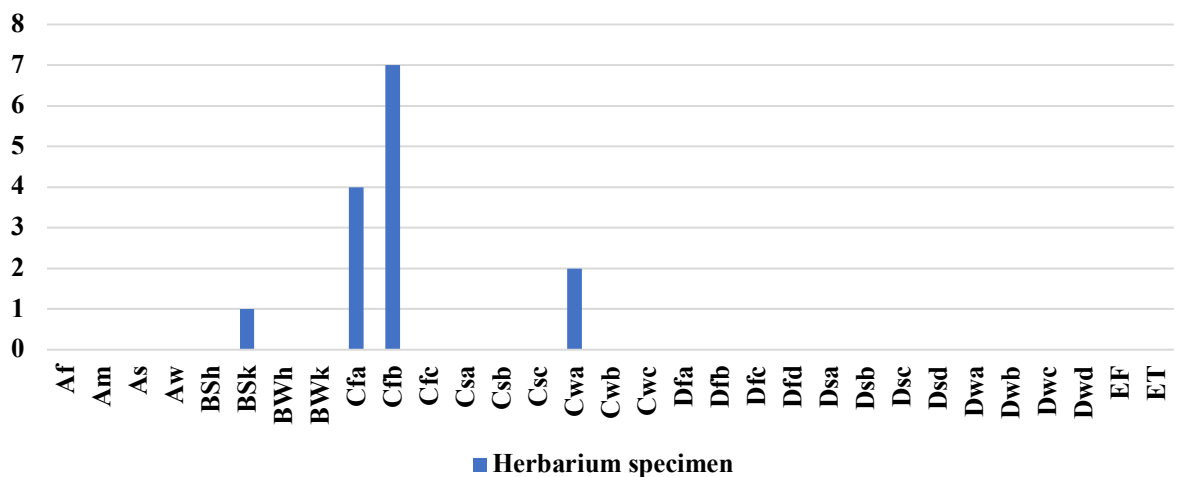

**Köppen profile, distribution and climate map** – GBIF occurrences of *Elodea callitrichoides*, natural distribution; herbarium specimens excluding duplicate occurrences (n = 7).

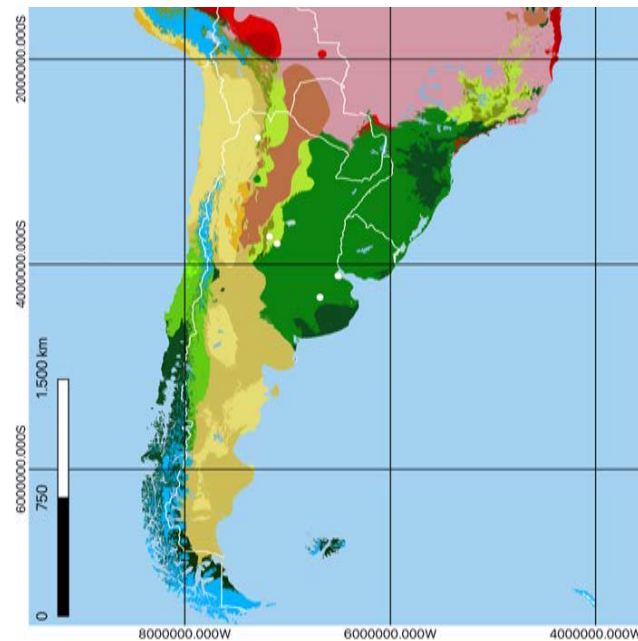

### Köppen profile of *Elodea callitrichoides*

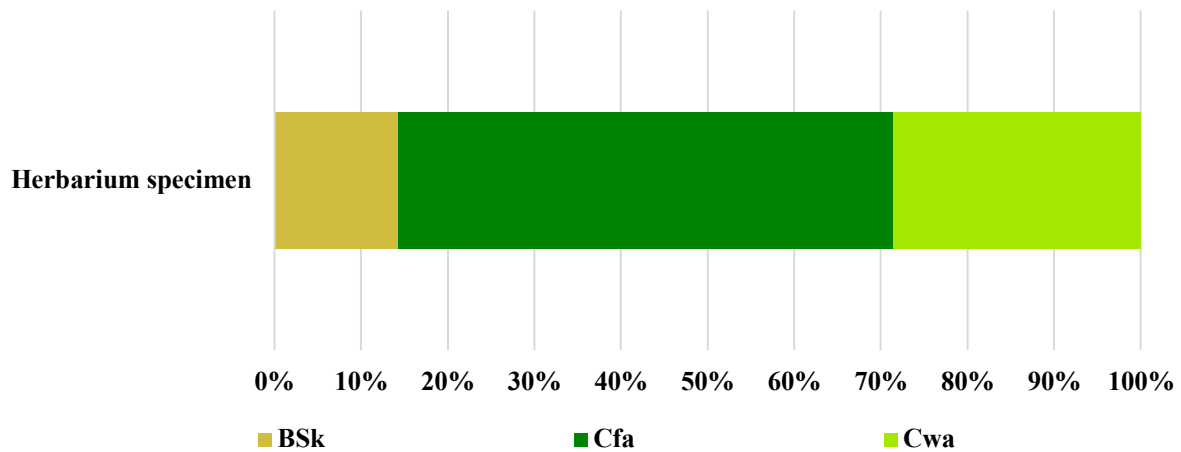

### Köppen profile of *Elodea callitrichoides*

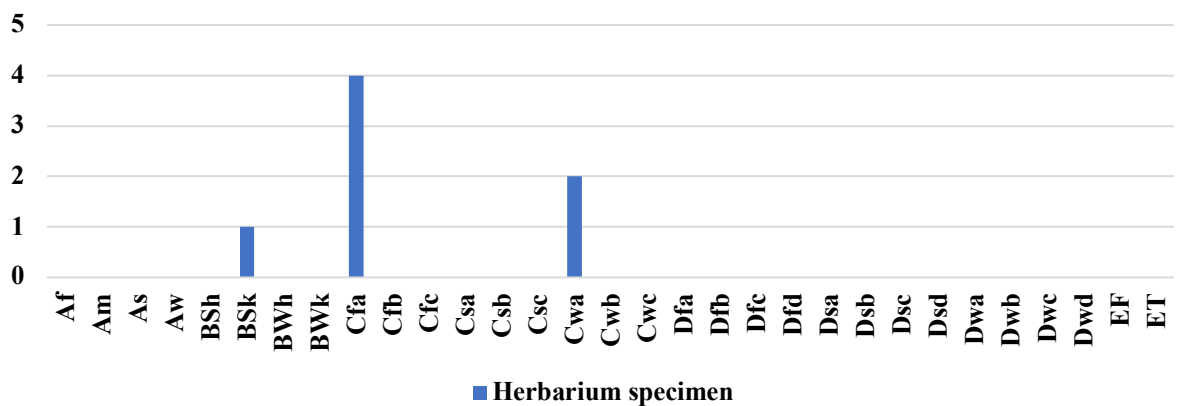

**5.2.2.2.3. Köppen profile, distribution and climate map** – GBIF occurrences of *Elodea canadensis* Michx. 1803; herbarium specimens excluding duplicate occurrences (n = 1134).

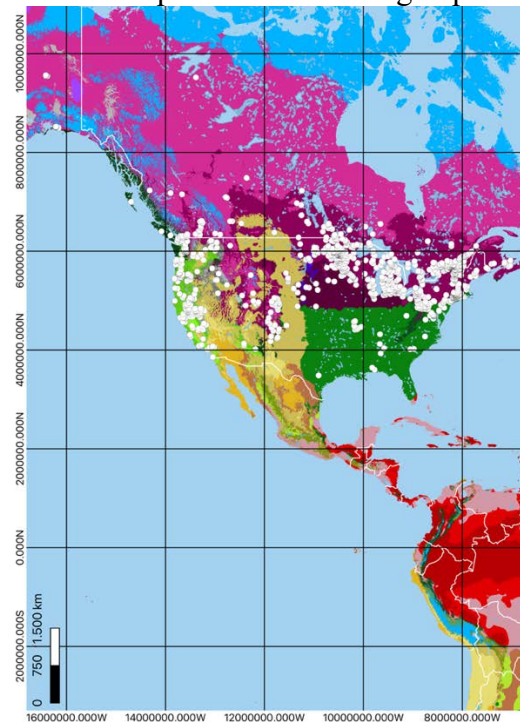

**Köppen profile of *Elodea canadensis***

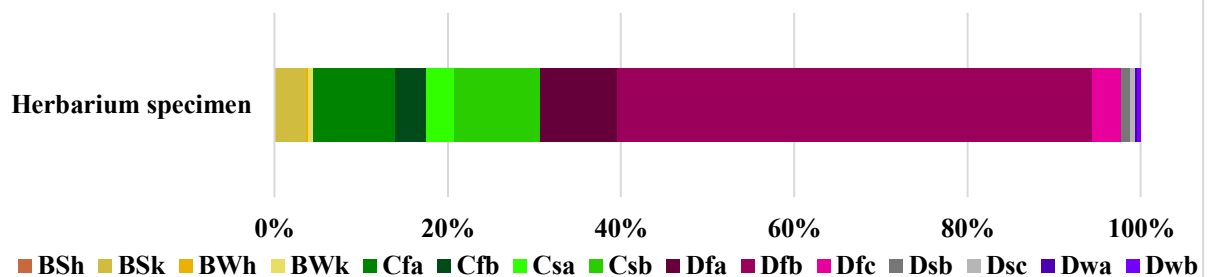

**Köppen profile of *Elodea canadensis***

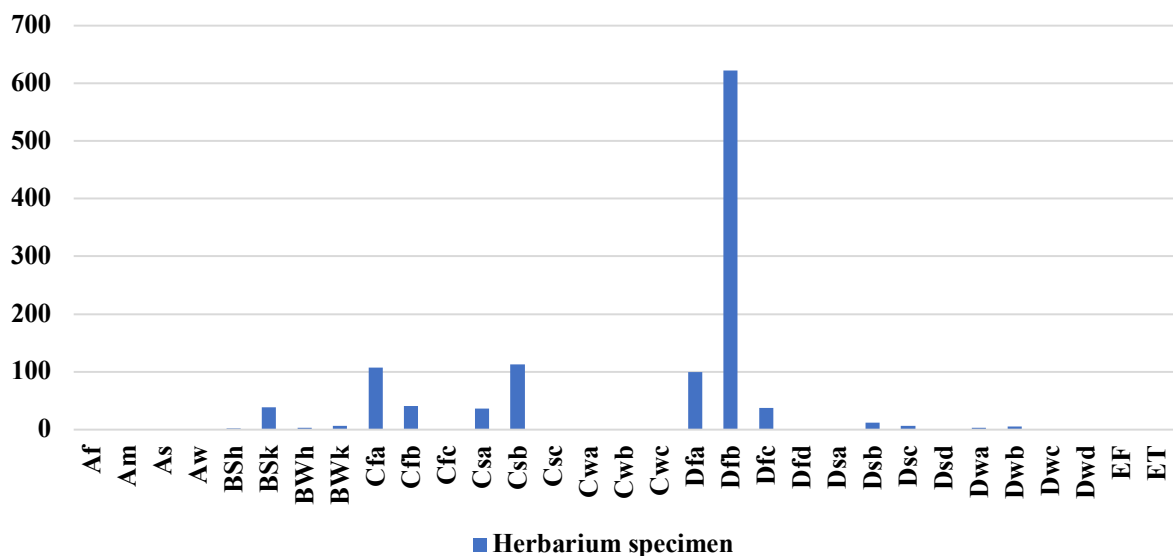

**5.2.2.2.4. Köppen profile, distribution and climate map**– GBIF occurrences of *Elodea granatensis* H.St.John 1962; herbarium specimens excluding duplicate occurrences (n = 148).

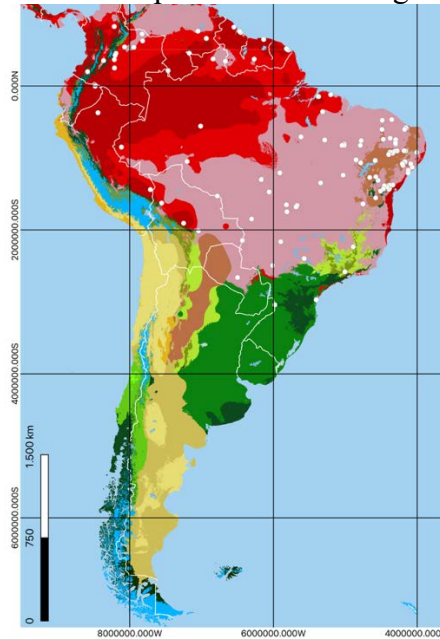

### Köppen profile of *Elodea granatensis*

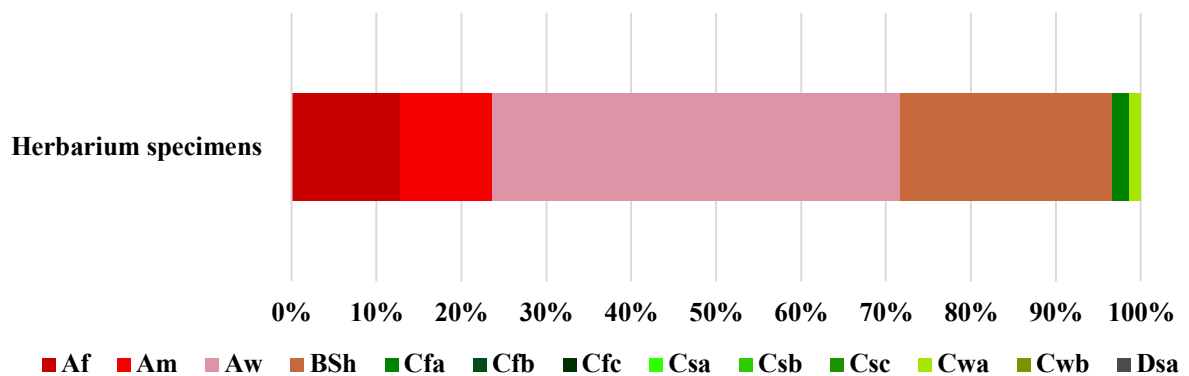

### Köppen profile of *Elodea granatensis*

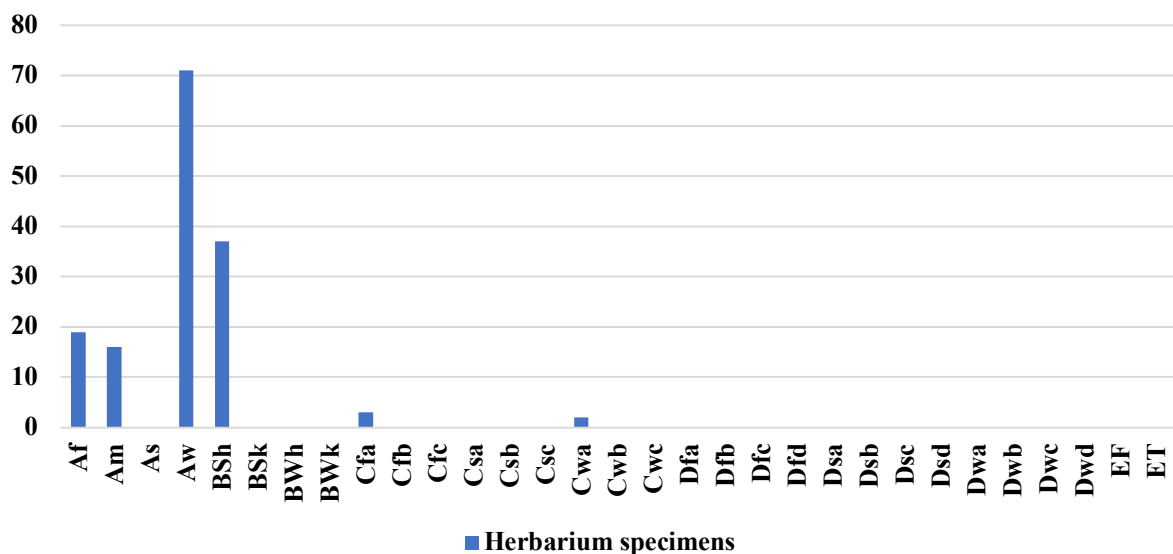

**5.2.2.2.5. Köppen profile, distribution and climate map–** GBIF occurrences of *Elodea nuttallii* H.St.John 1920; natural and neophyte distribution; herbarium specimen (n = 896).

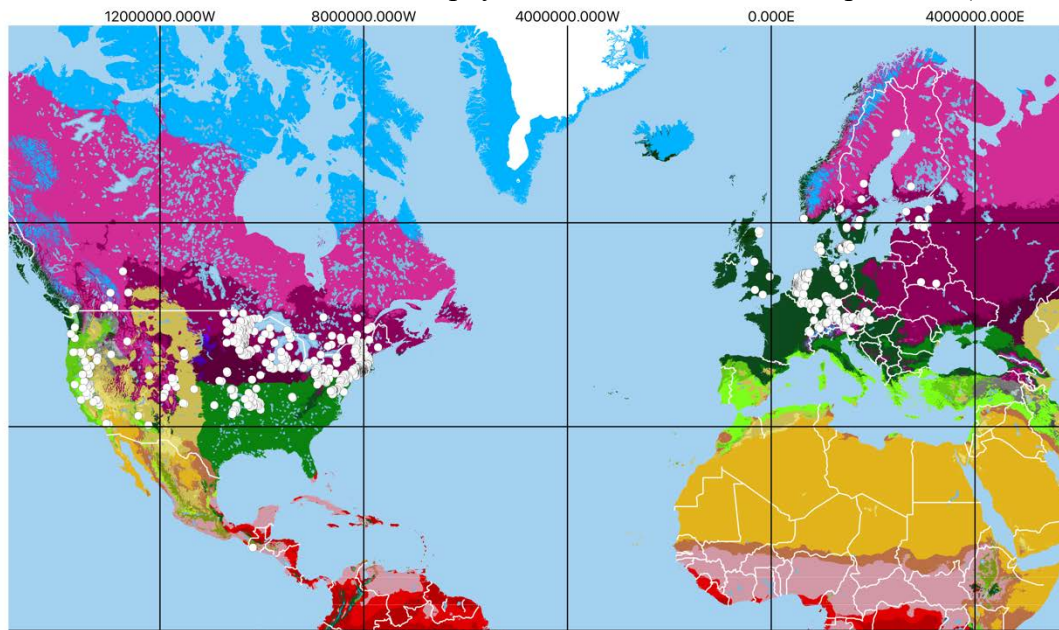

**Köppen profile of *Elodea nuttallii*  
+ neophyte localities**

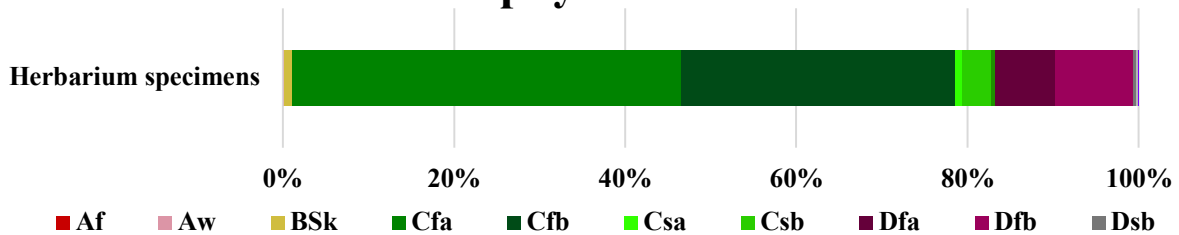

**Köppen profile of *Elodea nuttallii*  
+ neophyte localities**

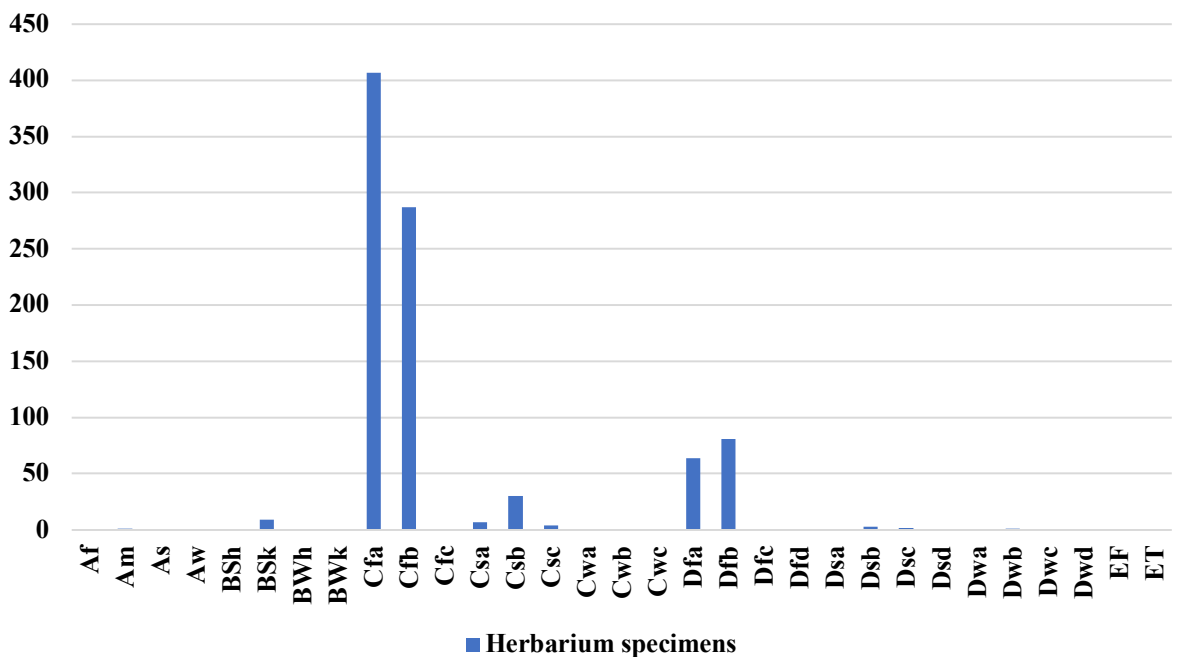

**Köppen profile, distribution and climate map**– GBIF occurrences of *Elodea nuttallii*; natural distribution; herbarium specimen (n = 488).

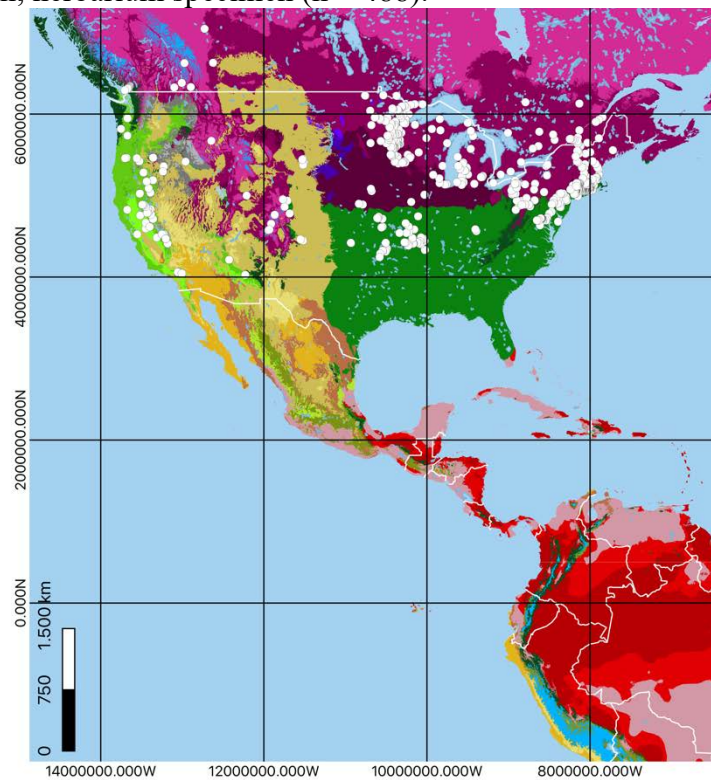

### Köppen profile of *Elodea nuttallii*

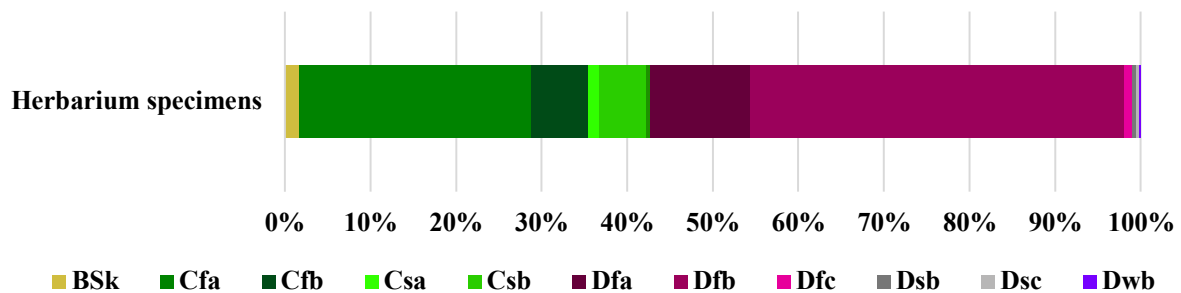

### Köppen profile of *Elodea nuttallii*

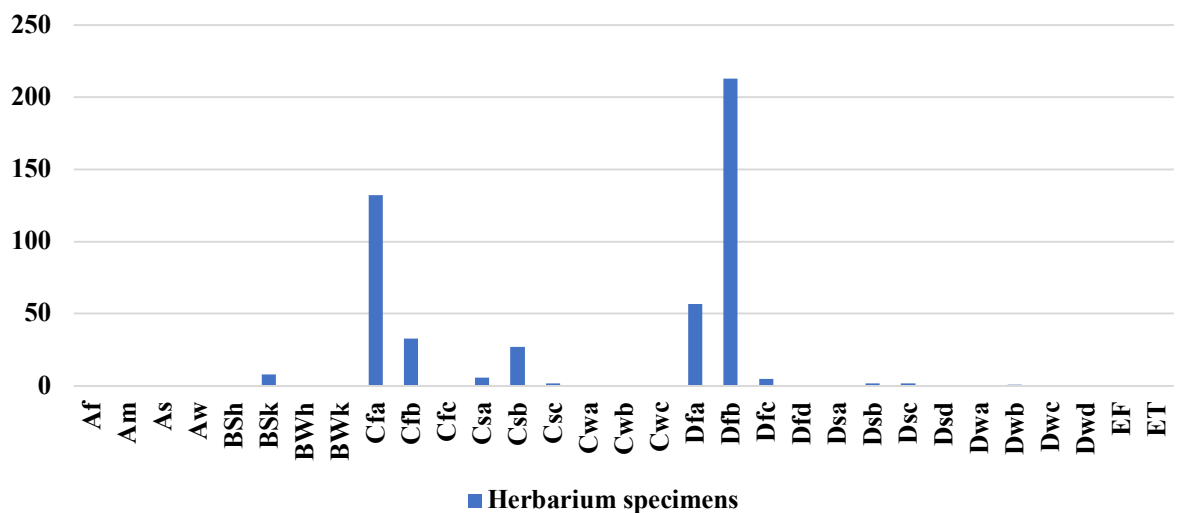

**5.2.2.2.6. Köppen profile, distribution and climate map**—GBIF occurrences of *Elodea potamogeton* Espinosa 1928; herbarium specimens excluding duplicate occurrences (n = 33).

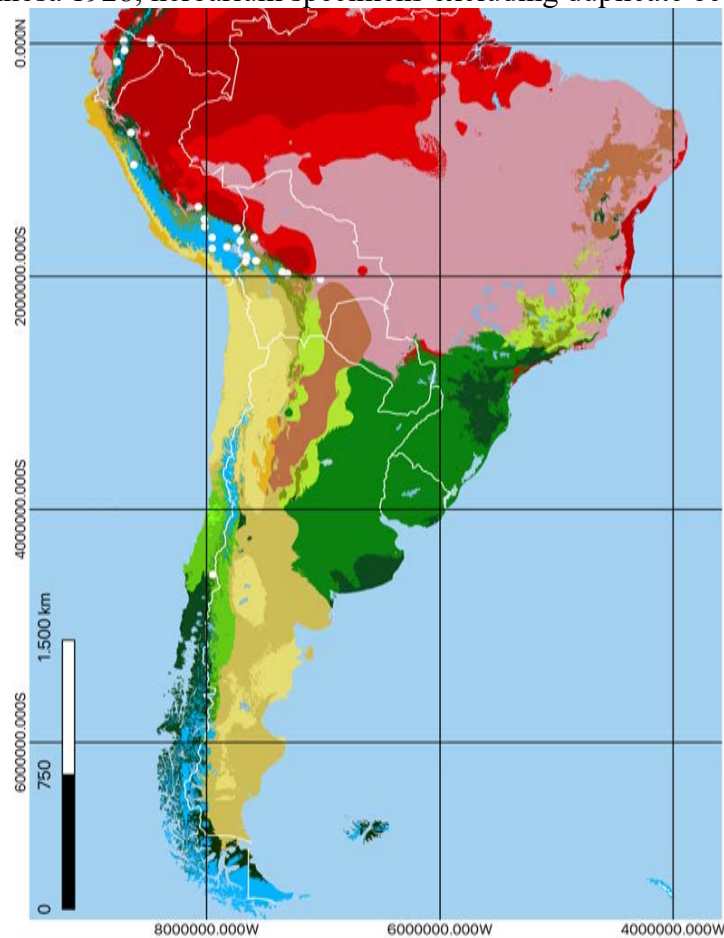

### Köppen profile of *Elodea potamogeton*

Herbarium specimens

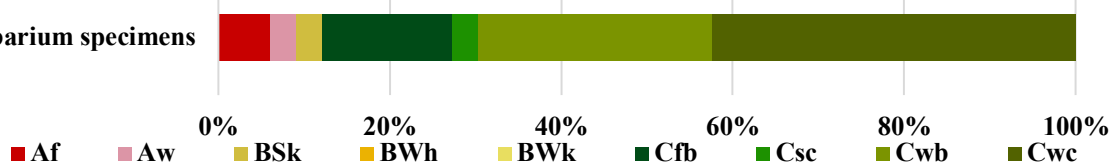

### Köppen profile of *Elodea potamogeton*

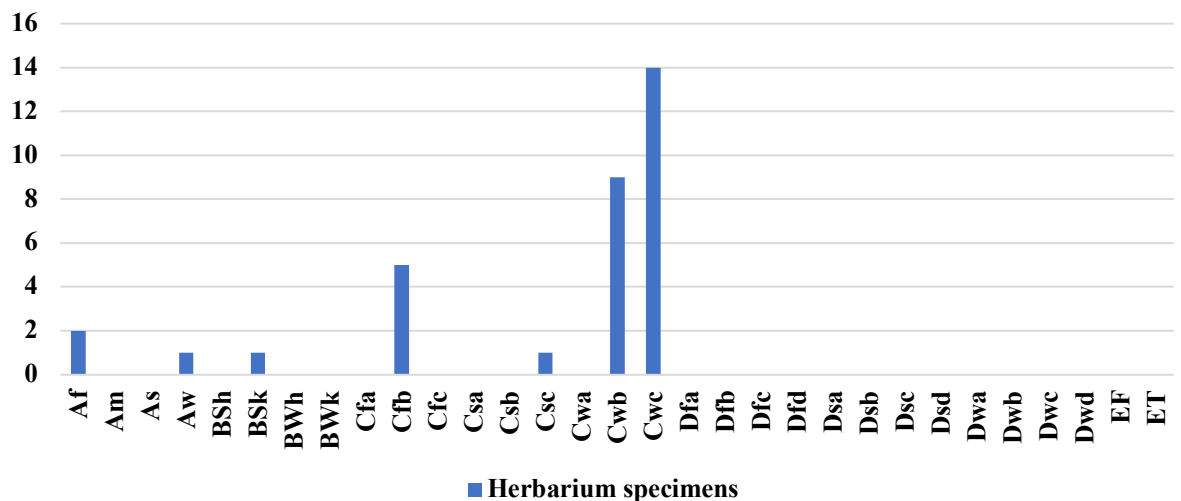

**5.2.3. Crown group Clade B of Hydrocharitaceae** cf. Chen et. al (2012), comprising *Blyxa* Noronha ex Thouars, 1806 and *Ottelia* Pers., 1805

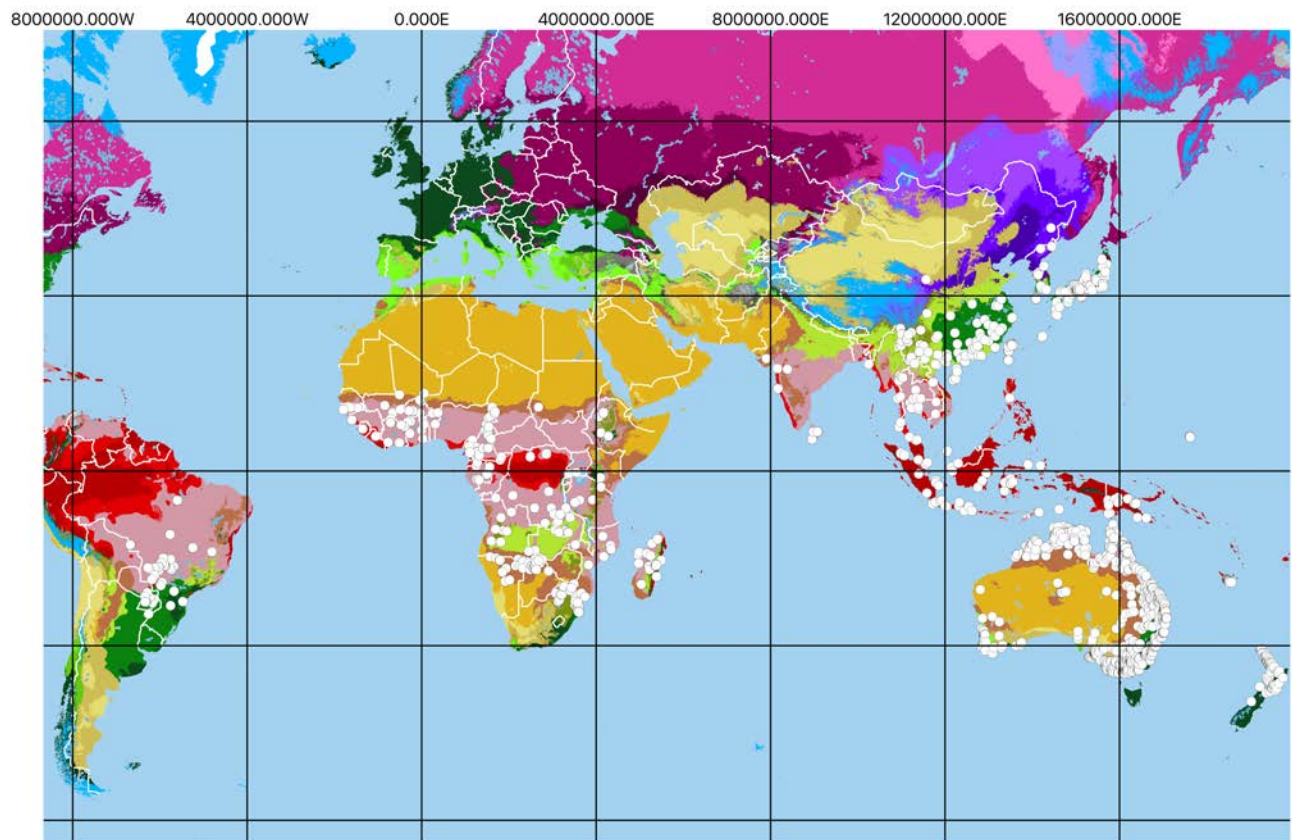

### 5.2.3.1 Genus *Blyxa* Noronha ex Thouars 1806.

**Distribution and Köppen profiles for genus *Blyxa*** incl. *B. auberti*, *B. echinosperma*, *B. hexandra*, *B. japonica*, *B. octandra*, *B. senegalensis*, *B. shimadai*, and *B. somai*, based on preserved specimen (n = 926).

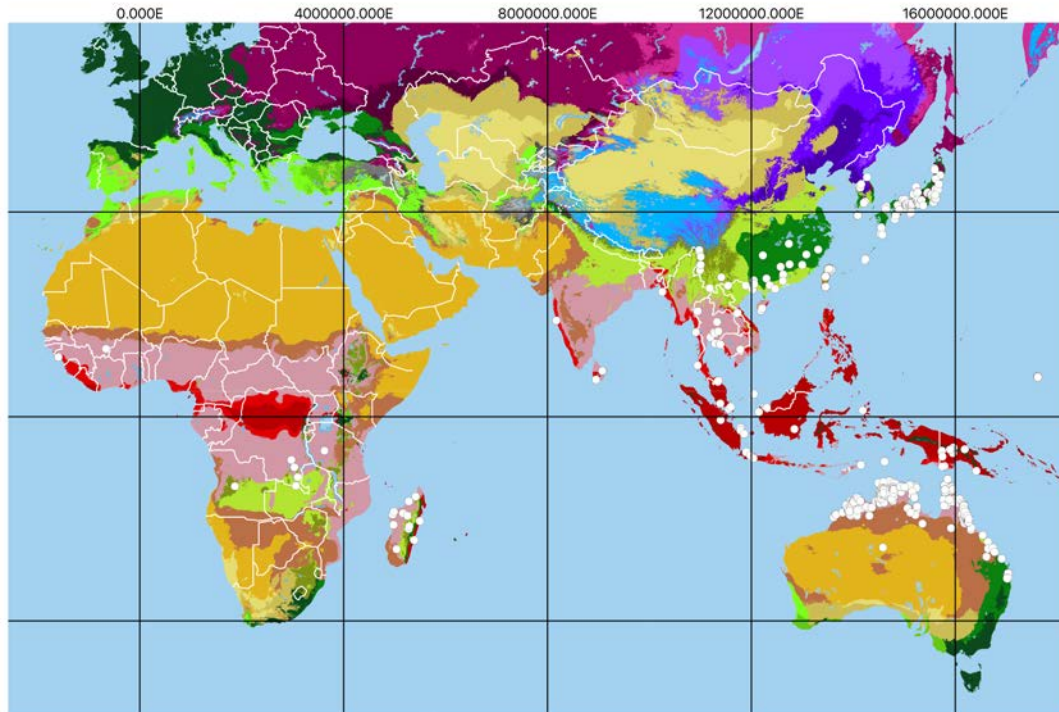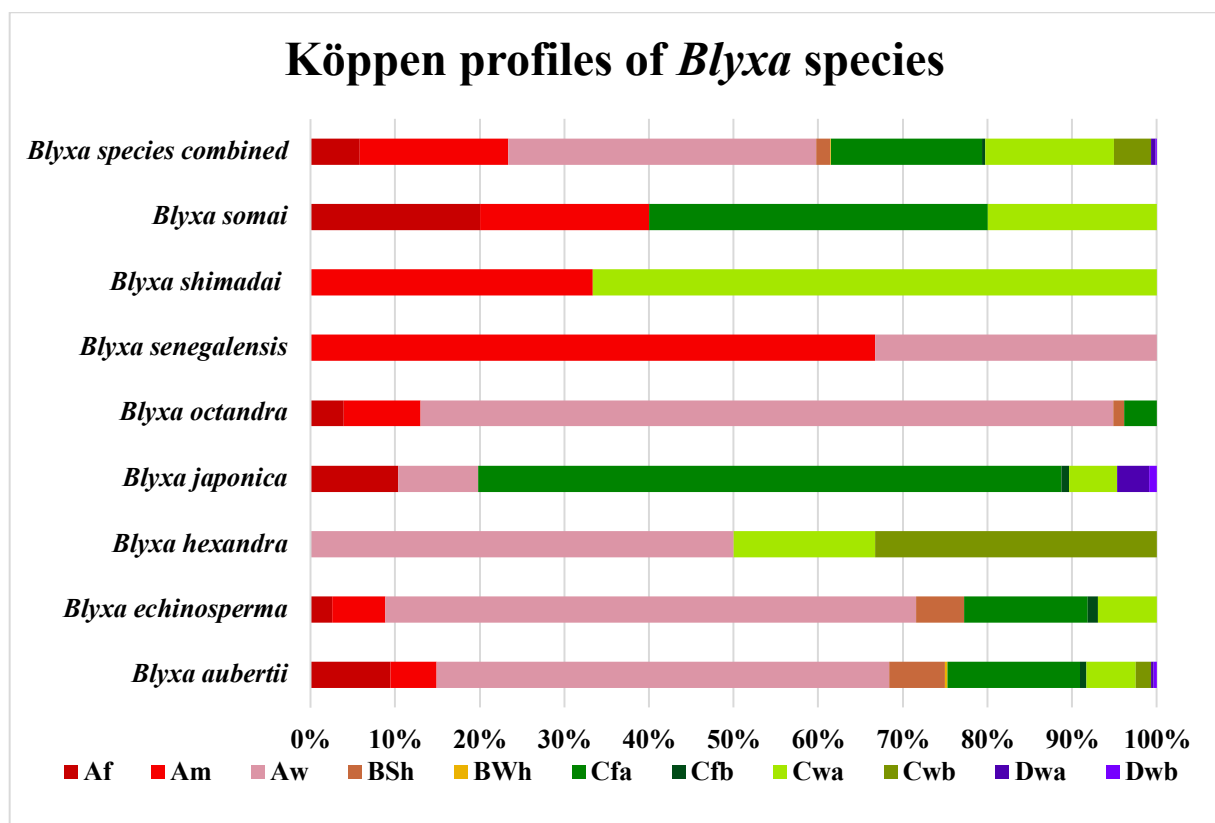

**5.2.3.1.1. Köppen profile, distribution and climate map**– GBIF occurrences of *Blyxa aubertii* Rich. 1814; herbarium specimens excluding duplicate occurrences (n = 275).

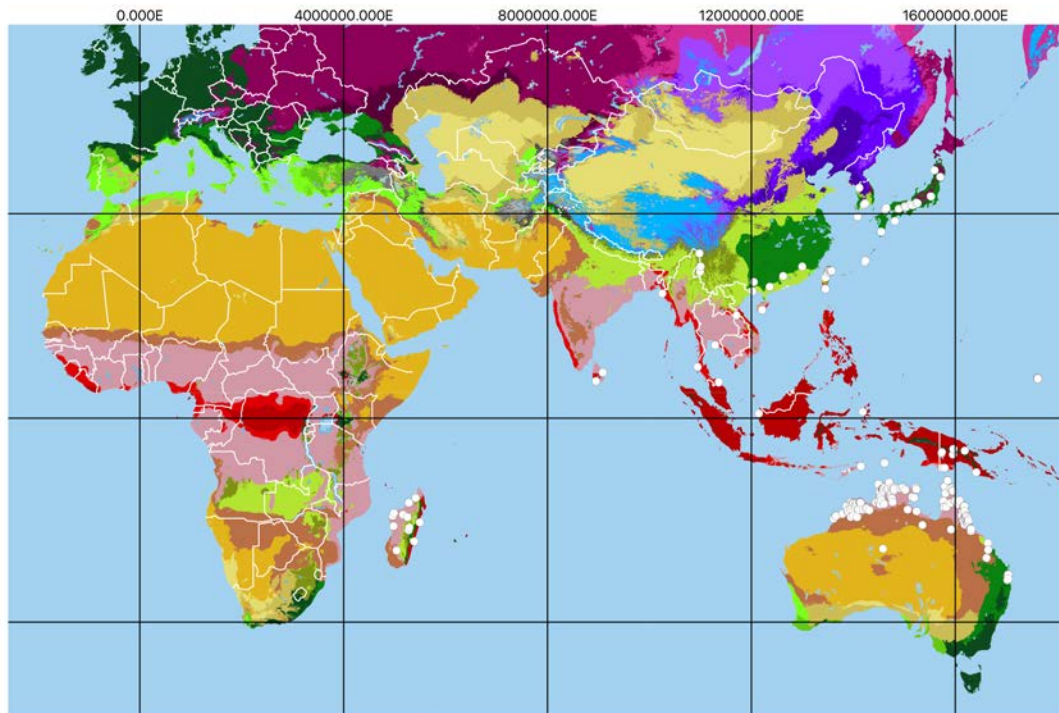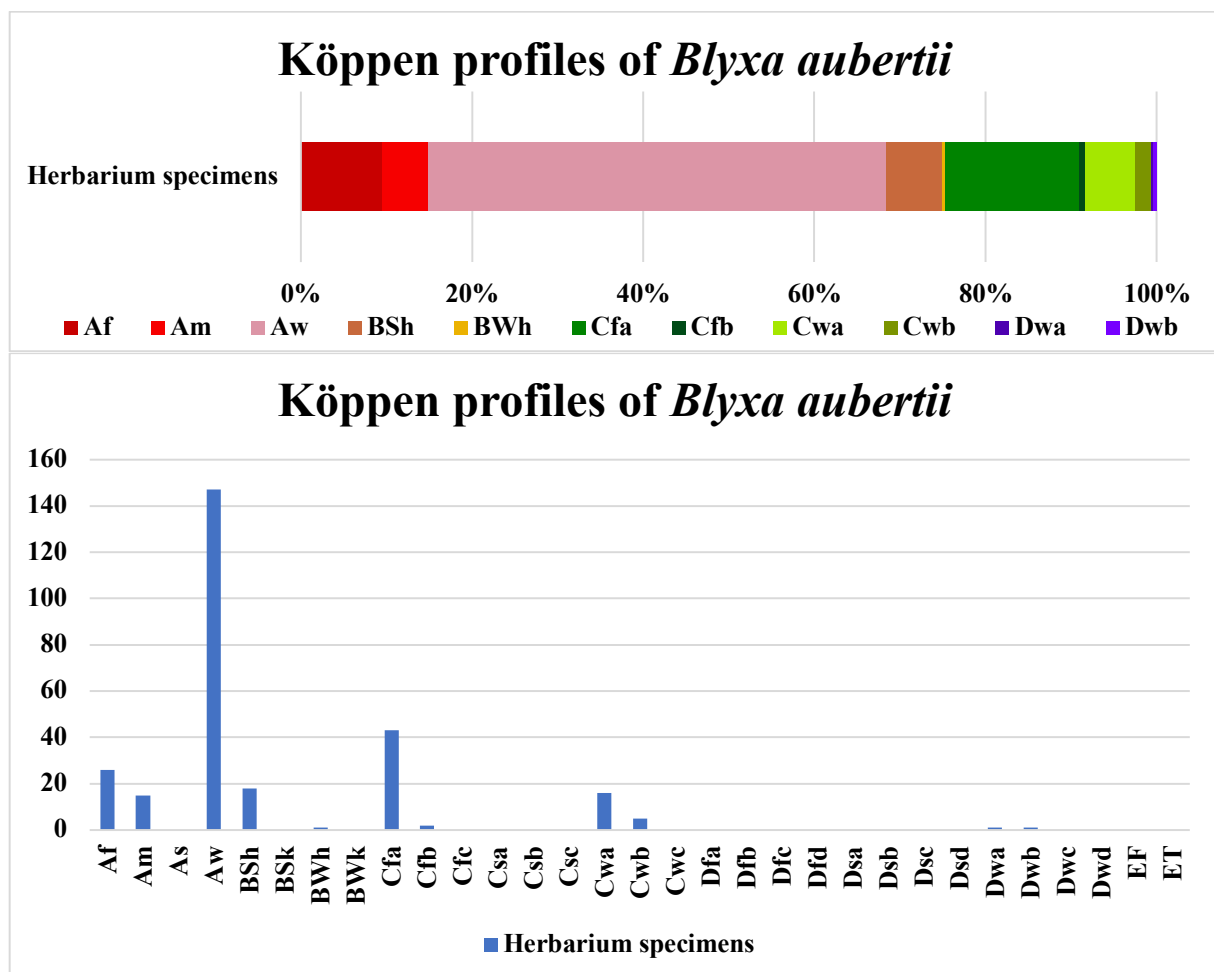

**5.2.3.1.2. Köppen profile, distribution and climate map**– GBIF occurrences of *Blyxa echinosperma* Hook f. 1888; herbarium specimens excluding duplicate occurrences (n = 158).

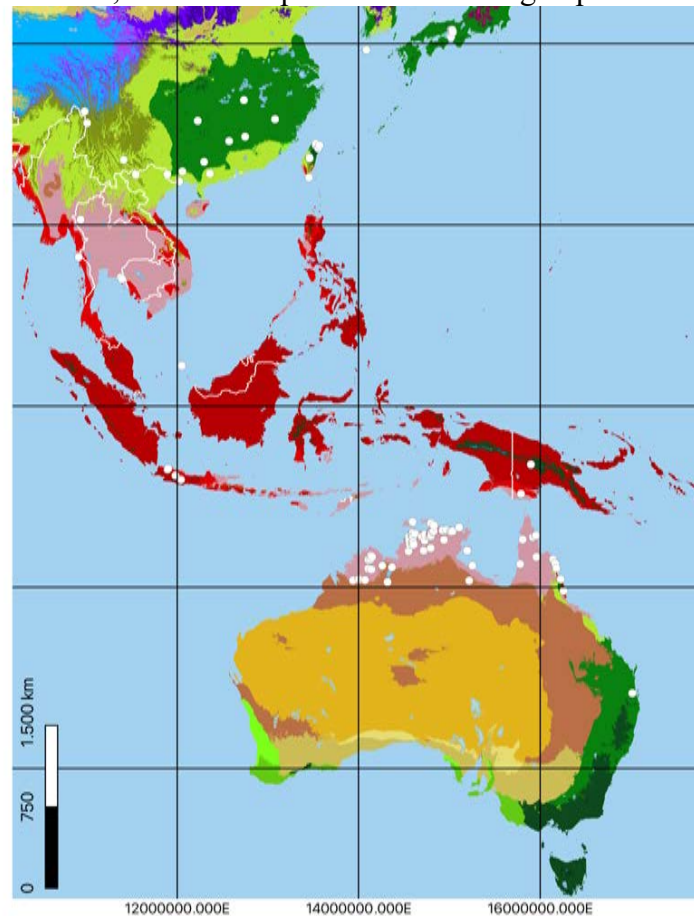

### Köppen profile of *Blyxa echinosperma*

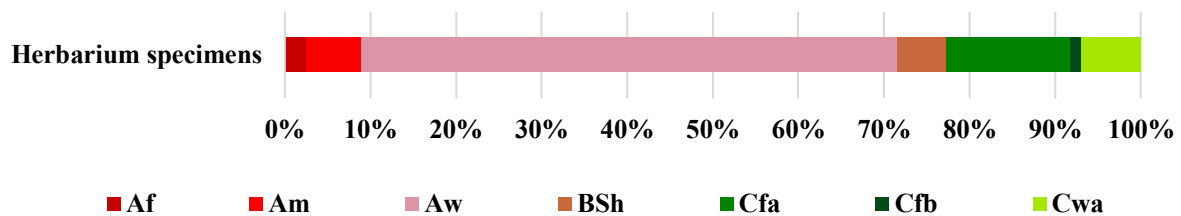

### Köppen profile of *Blyxa echinosperma*

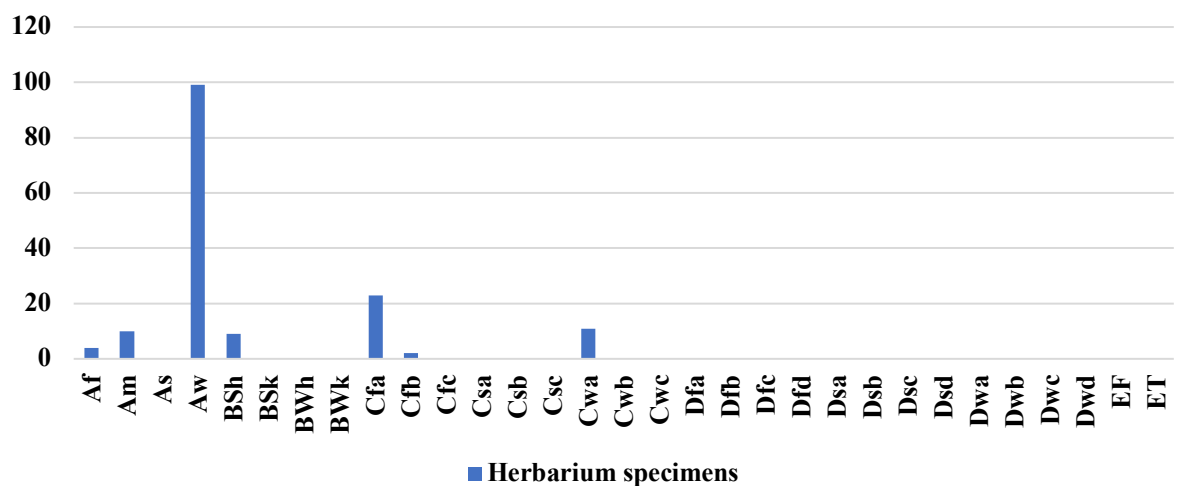

**5.2.3.1.3. Köppen profile, distribution and climate map**– GBIF occurrences of *Blyxa hexandra* C.D.K.Cook & Luond 1980; herbarium specimens excluding duplicate occurrences (n = 6).

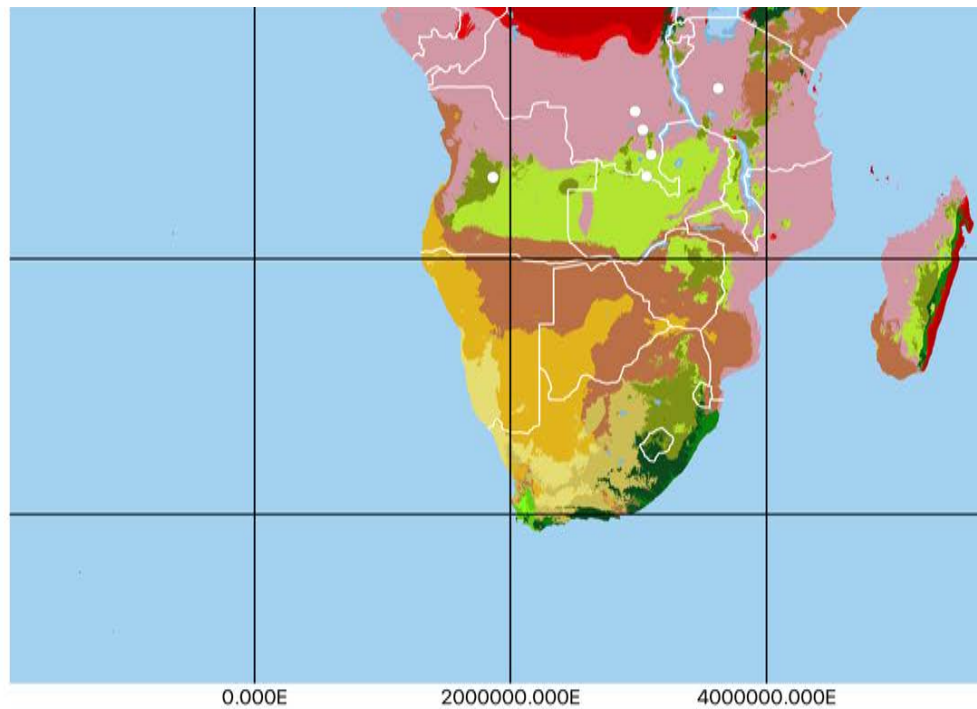

### Köppen profile of *Blyxa hexandra*

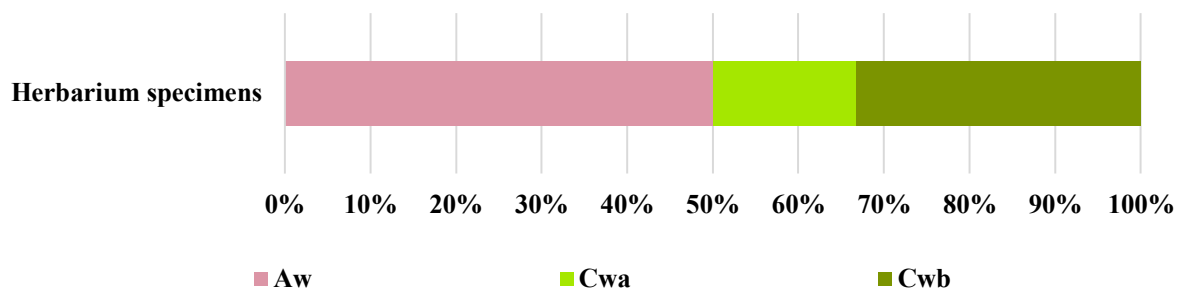

### Köppen profile of *Blyxa hexandra*

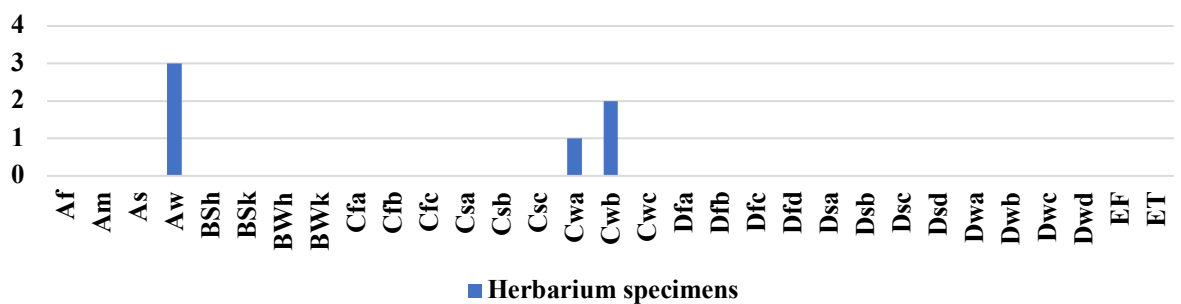

**5.2.3.1.4. Köppen profile, distribution and climate map**– GBIF occurrences of *Blyxa japonica* (Miq. 1866) Maxim. ex Asch & Gürke 1889; herbarium specimens excluding duplicate occurrences (n = 106).

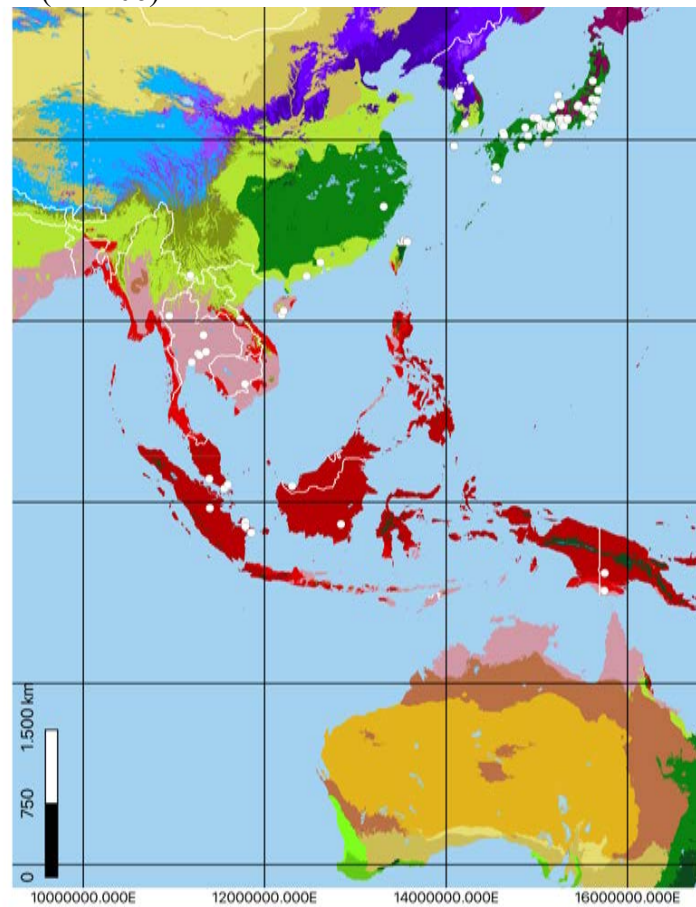

### Köppen profile of *Blyxa japonica*

Herbarium specimens

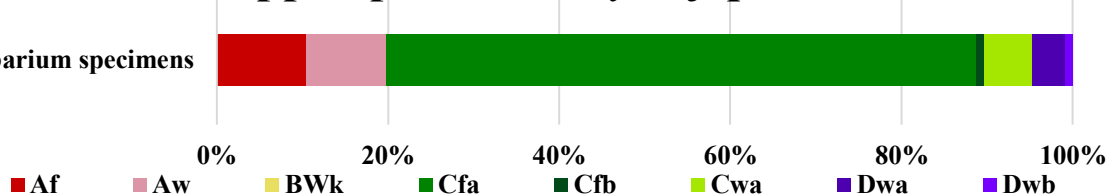

### Köppen profile of *Blyxa japonica*

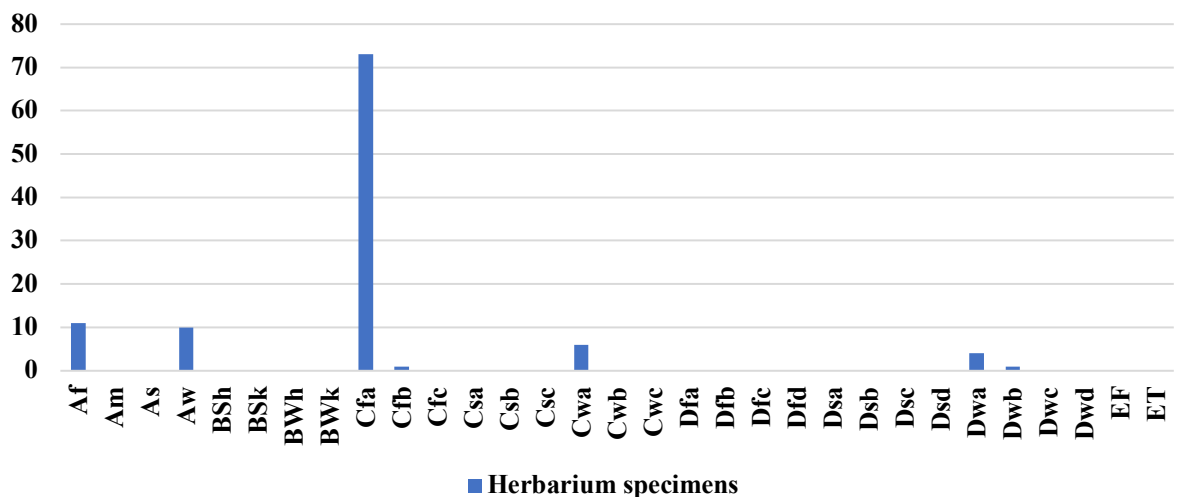

**5.2.3.1.5. Köppen profile, distribution and climate map**– GBIF occurrences of *Blyxa octandra* (Roxb. 1802) Planch. ex Thwaites 1864; herbarium specimens excluding duplicate occurrences (n = 77).

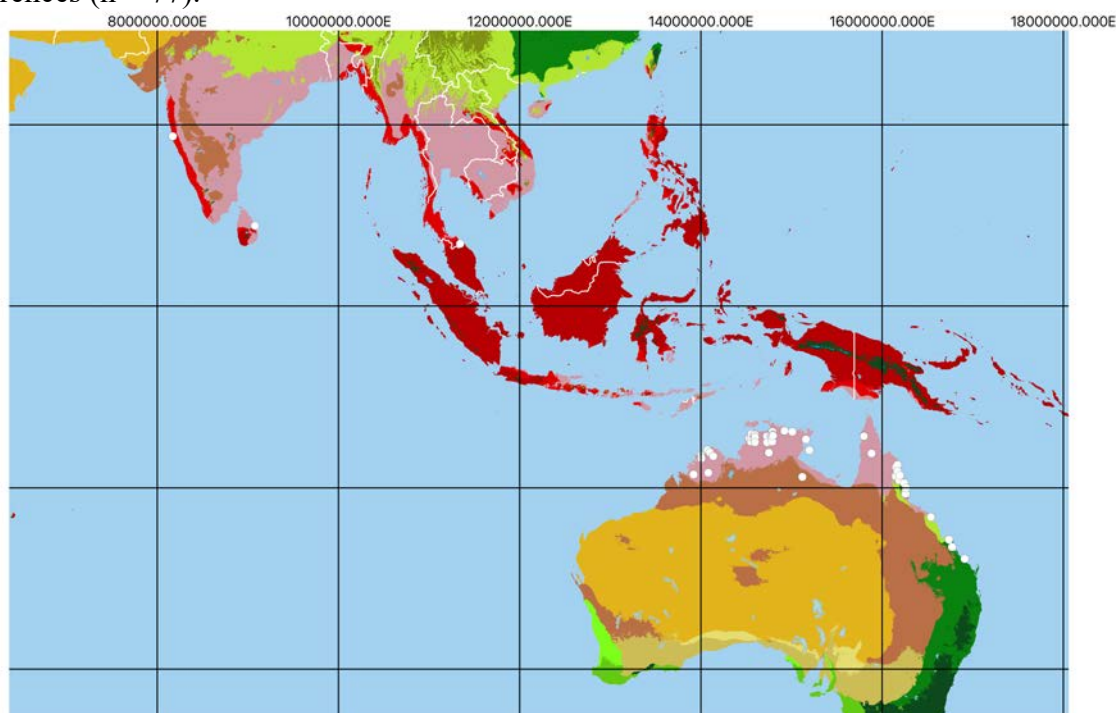

**Köppen profile of *Blyxa octandra***

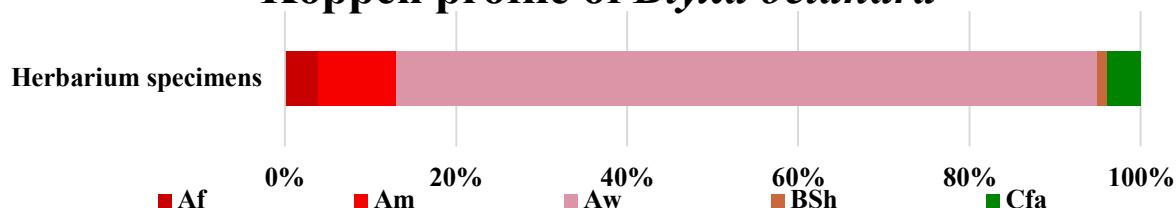

**Köppen profile of *Blyxa octandra***

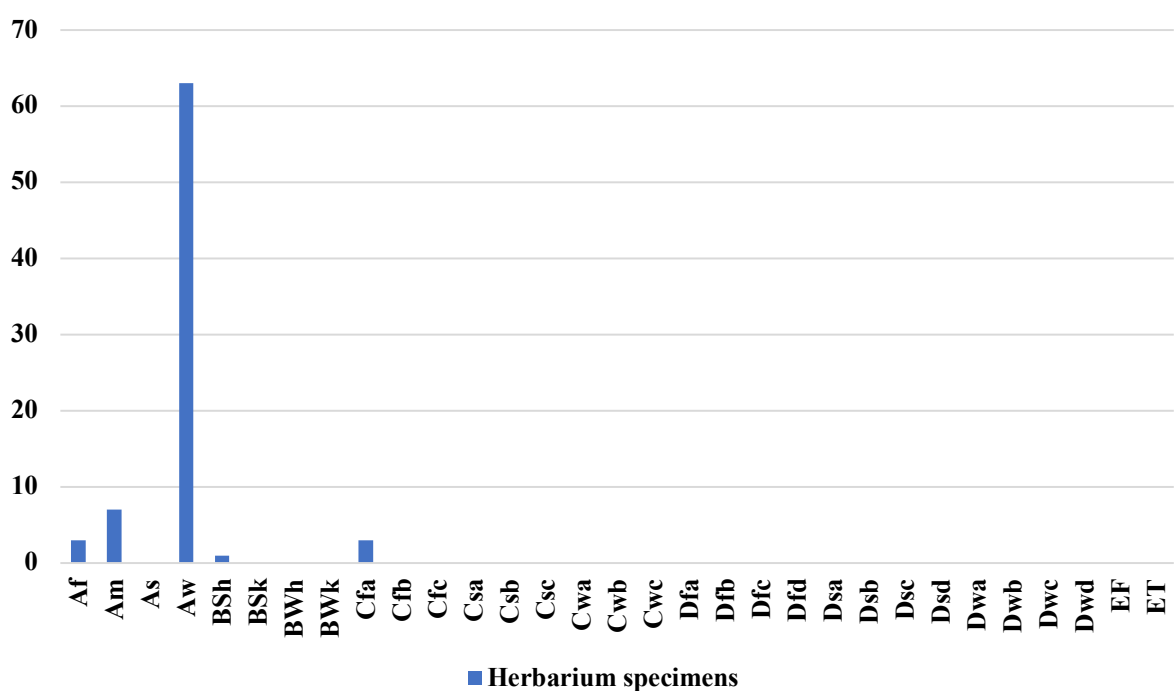

**5.2.3.1.6. Köppen profile, distribution and climate map**– GBIF occurrences of *Blyxa senegalensis* Dandy 1934; herbarium specimens excluding duplicate occurrences (n = 3).

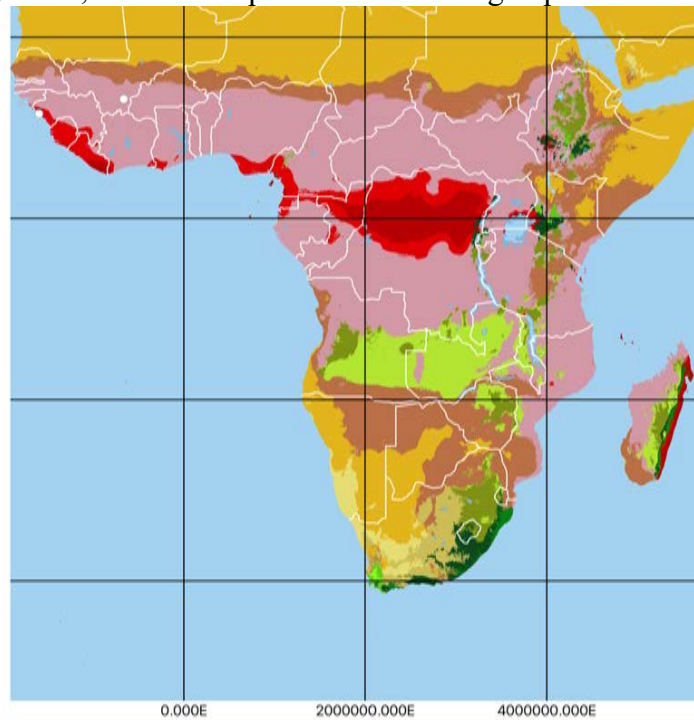

**Köppen profile of *Blyxa senegalensis***

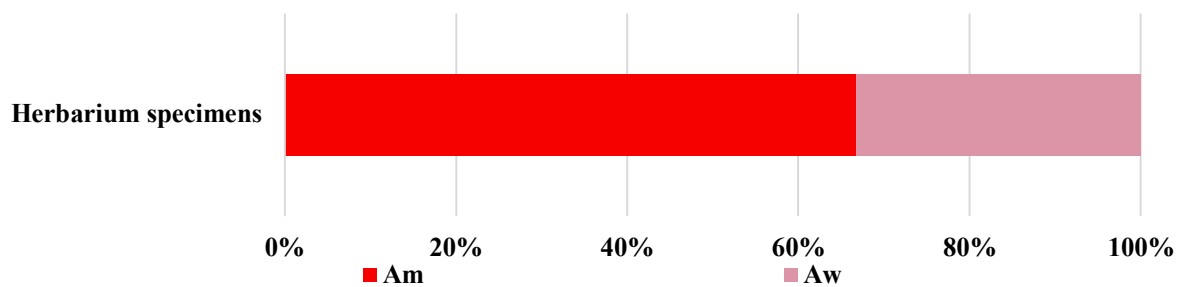

**Köppen profile of *Blyxa senegalensis***

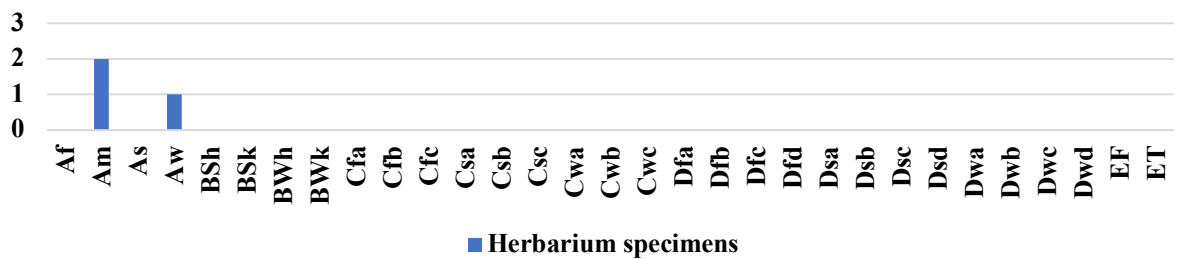

**5.2.3.1.7. Köppen profile, distribution and climate map**– GBIF occurrences of *Blyxa somai* Hayata 1915; herbarium specimens excluding duplicate occurrences (n = 5).

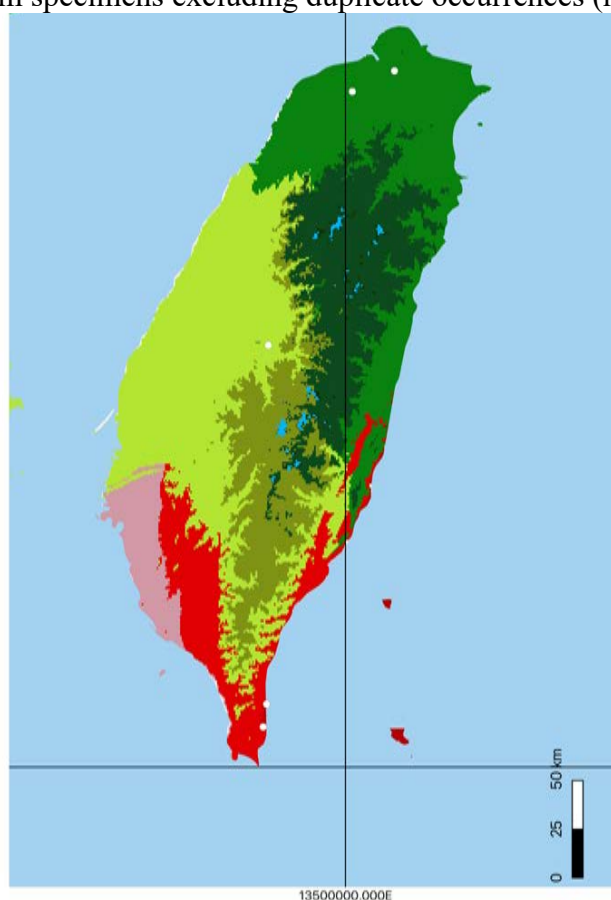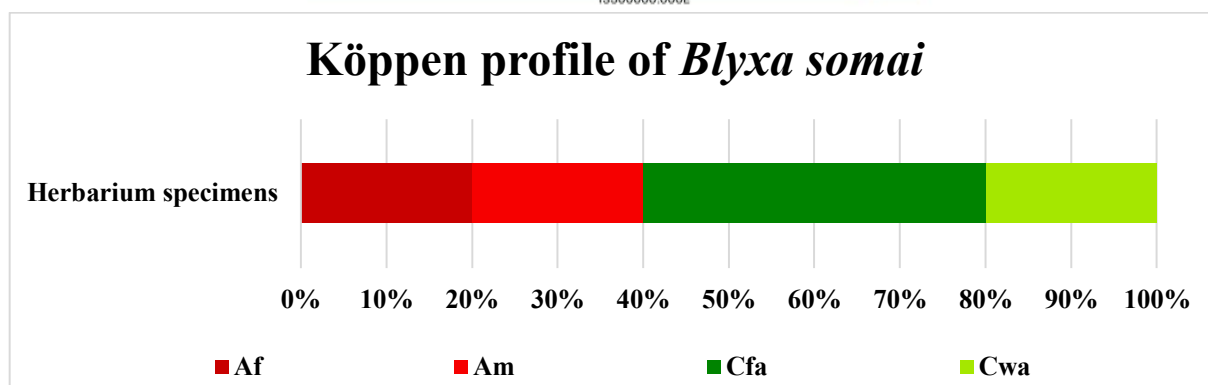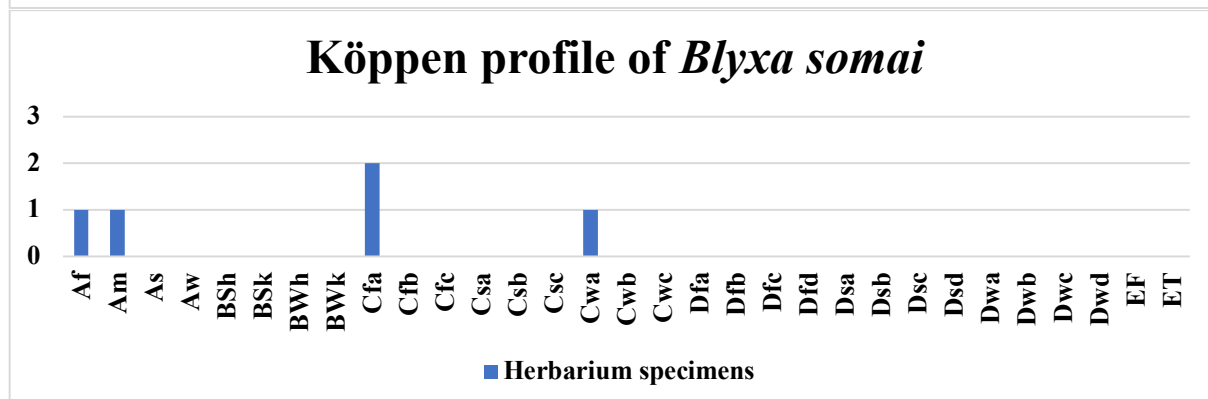

**5.2.3.1.8. Köppen profile, distribution and climate map**– GBIF occurrences of *Blyxa shimadai* Hayata 1915; herbarium specimens excluding duplicate occurrences (n = 13).

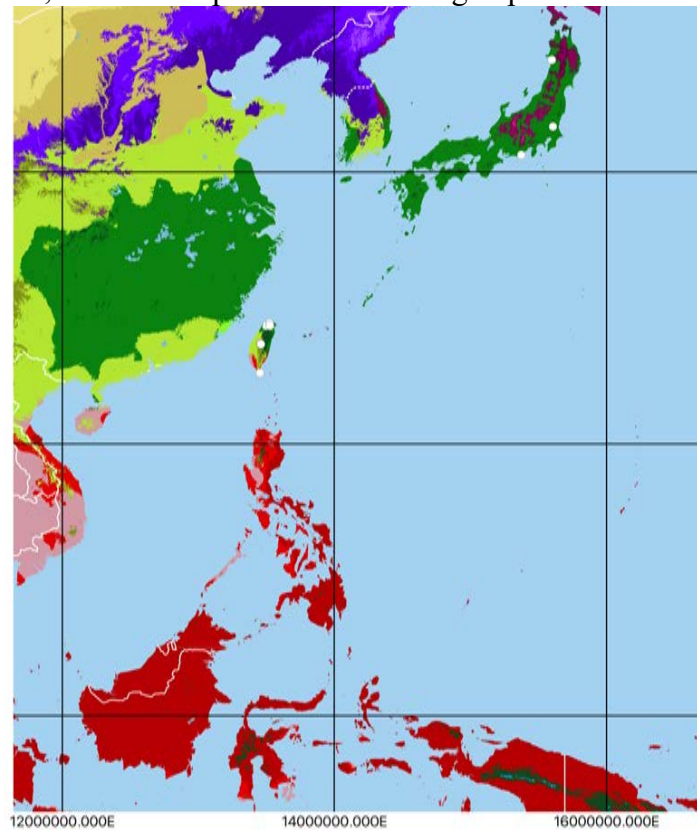

**Köppen profile of *Blyxa shimadai***

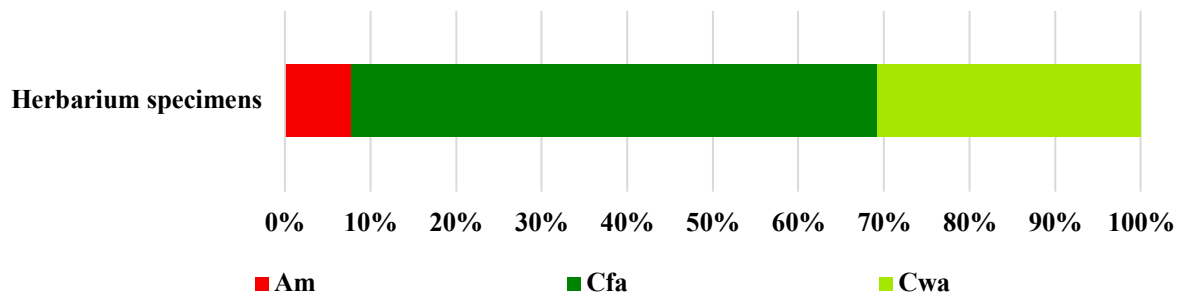

**Köppen profile of *Blyxa shimadai***

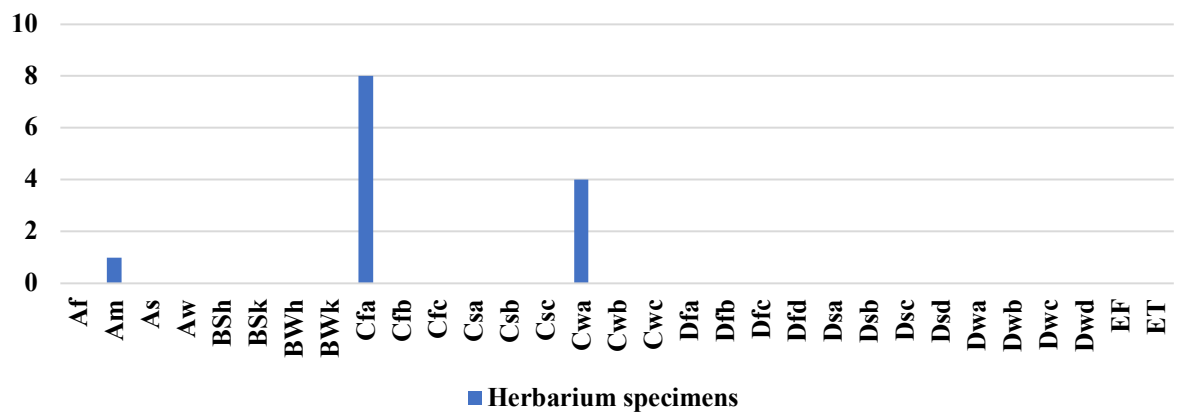

**Distribution and Köppen profiles of genus *Ottelia*** incl. *Ottelia acuminata*, *O. alismoides*, *O. balanesnsae*, *O. brasiliensis*, *O. cordata*, *O. exserta*, *O. kunenensis*, *O. mesenterium*, *O. muricata*, *O. ovalifolia*, *O. ulvifolia*, and *O. verdickii*, based on preserved specimen (n = 1670).

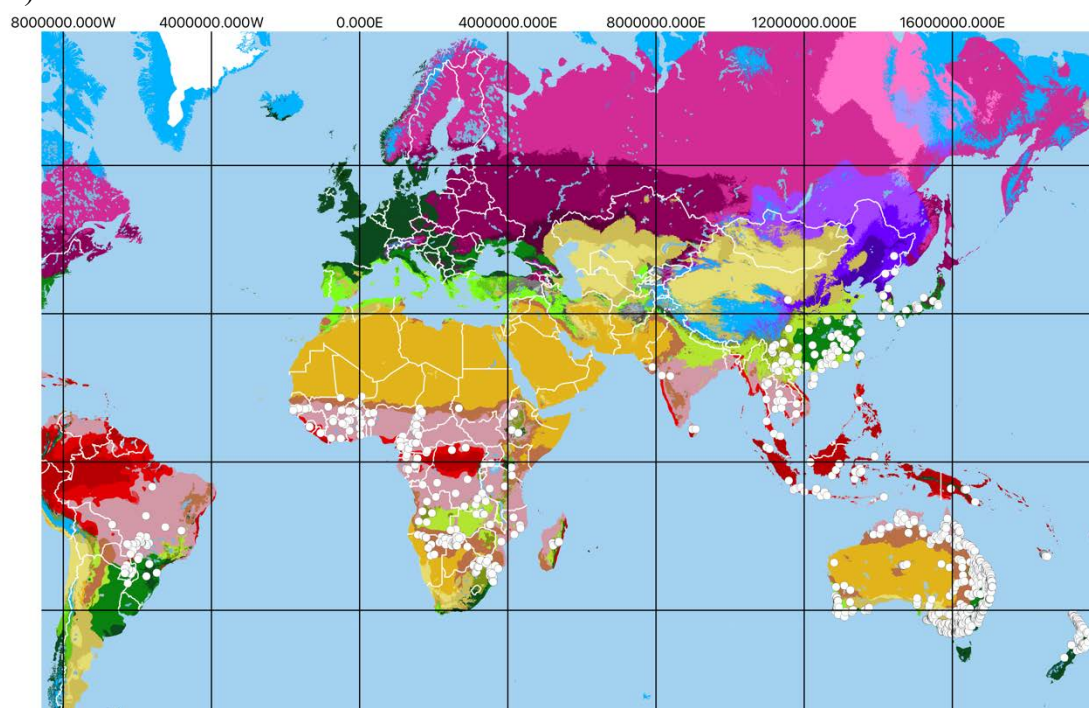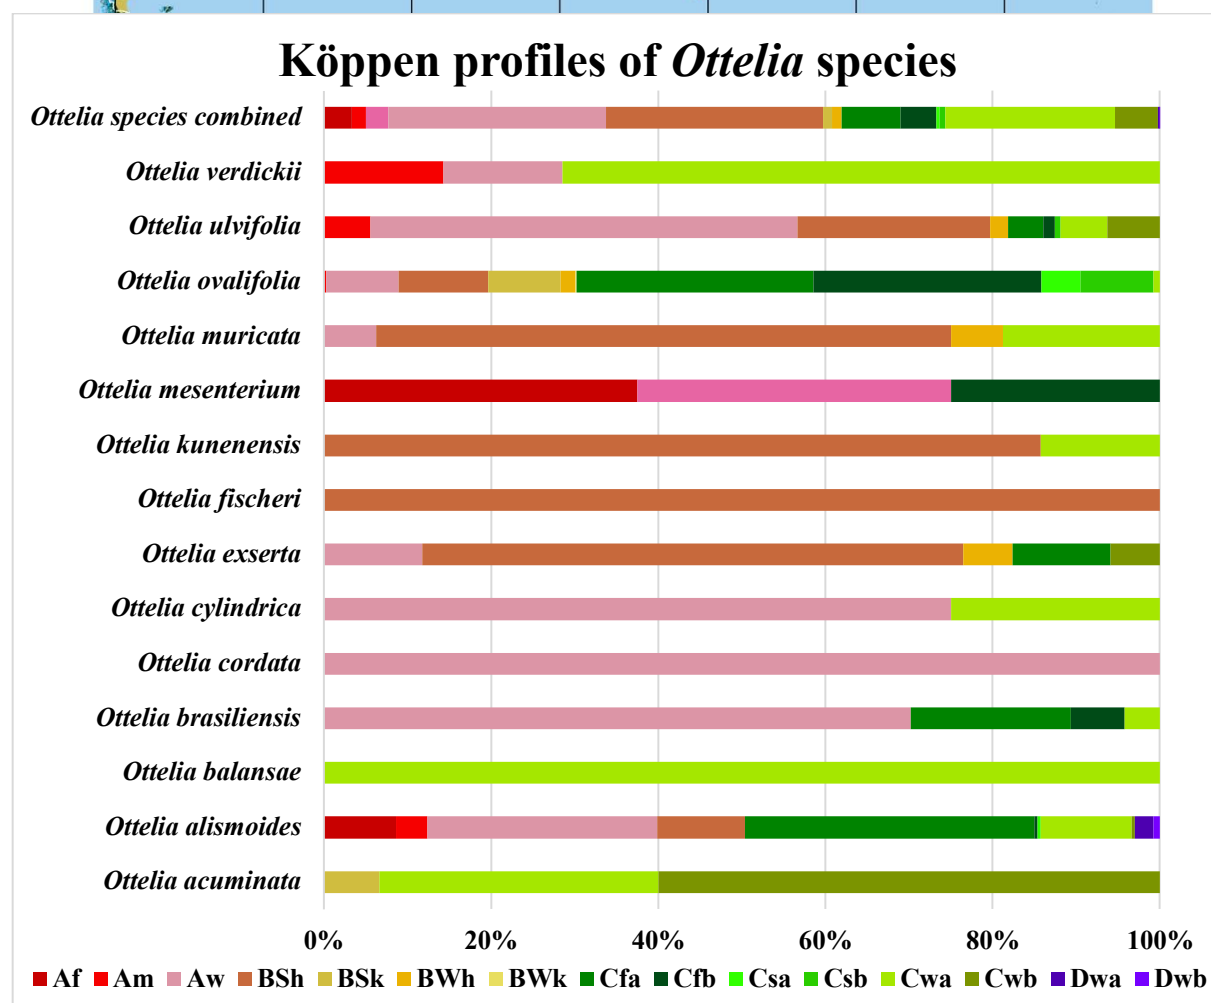

**5.2.3.2.1. Köppen profile, distribution and climate map**– GBIF occurrences of *Ottelia acuminata* (Gagnep. 1907) Dandy 1934; herbarium specimens excluding duplicate occurrences (n = 15).

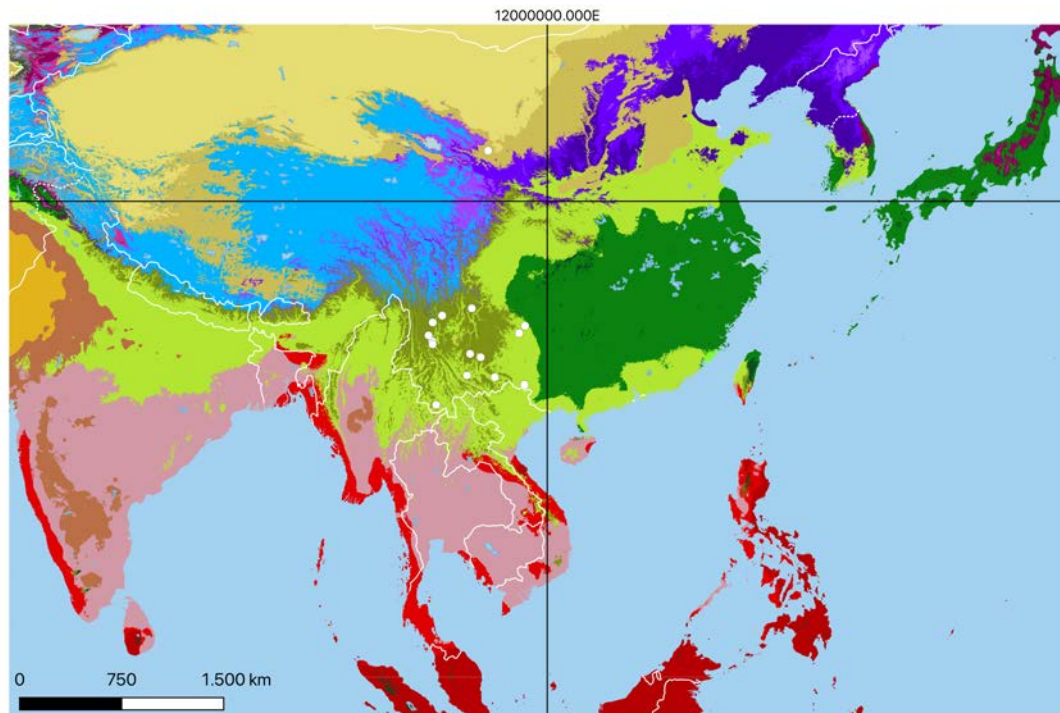

### Köppen profile of *Ottelia acuminata*

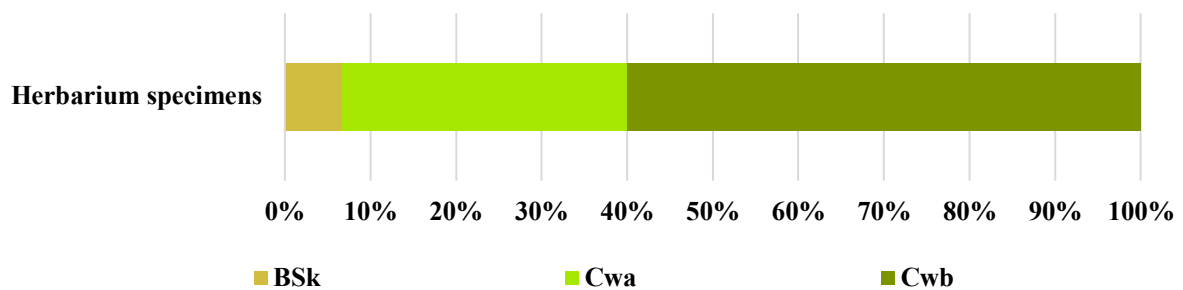

## Köppen profile of *Ottelia acuminata*

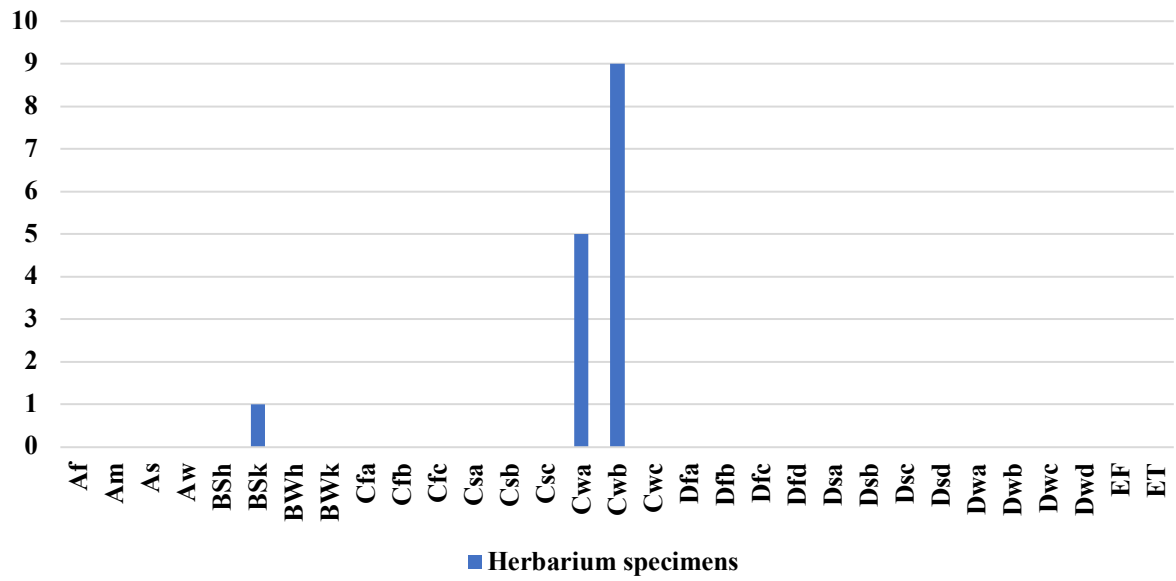

**5.2.3.2.2. Köppen profile, distribution and climate map** – GBIF occurrences of *Ottelia alismoides* (L. 1753) Pers. 1805; herbarium specimens excluding duplicate occurrences (n = 266).

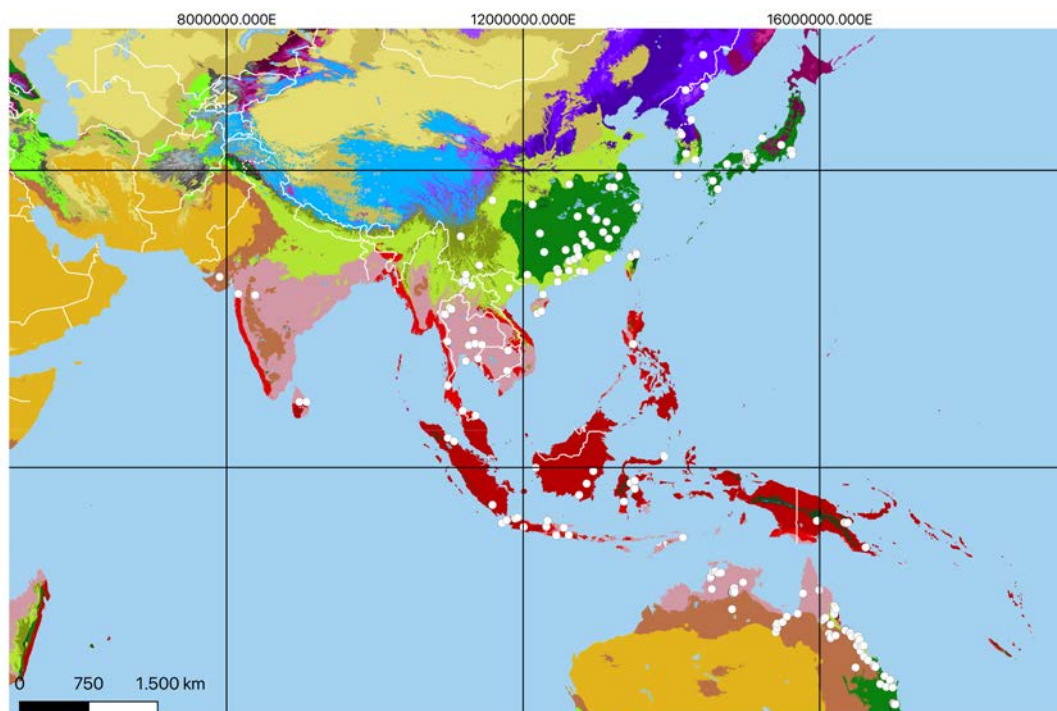

**Köppen profile of *Ottelia alismoides***

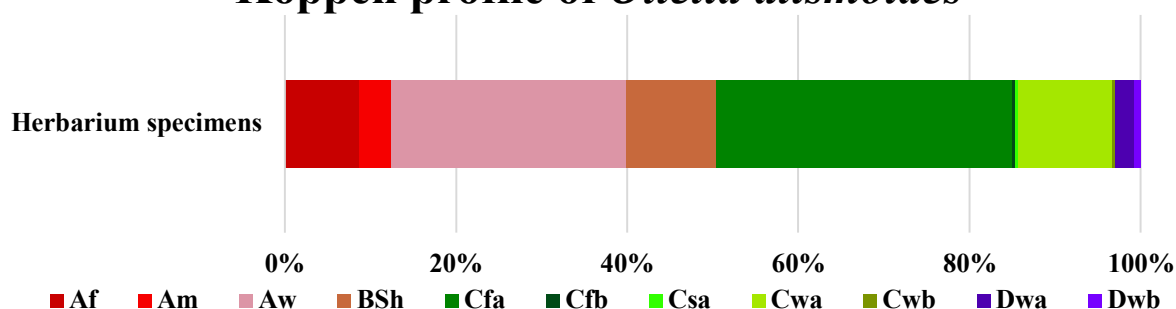

## Köppen profile of *Ottelia alismoides*

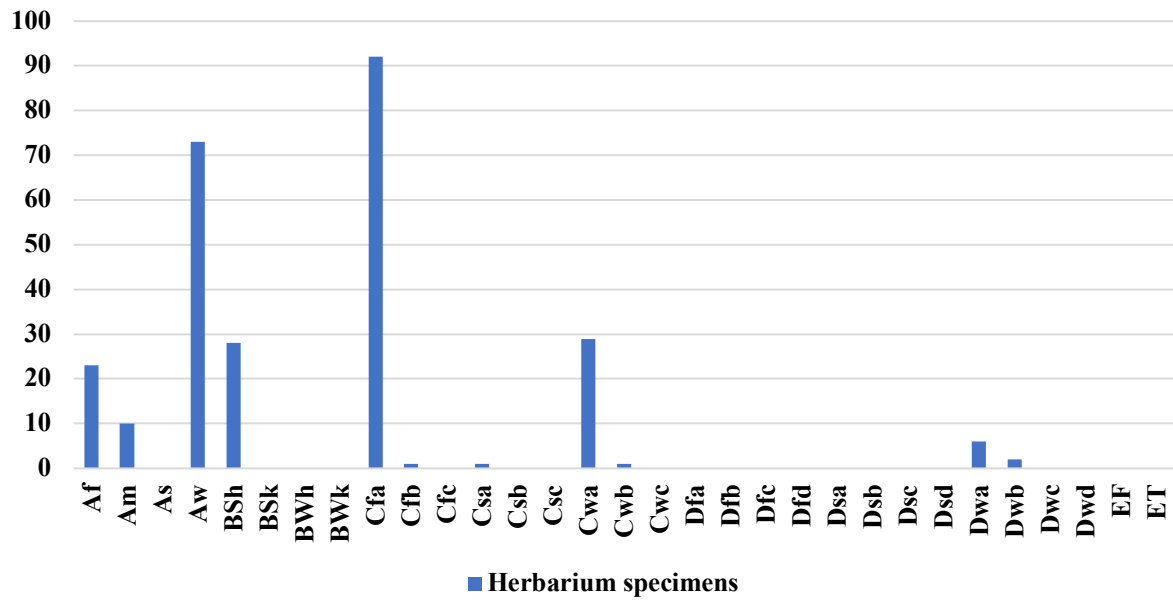

**5.2.3.2.3. Köppen profile, distribution and climate map** – GBIF occurrences of *Ottelia balansae* (Gagnep. 1907) Dandy 1934; herbarium specimens excluding duplicate occurrences (n = 1).

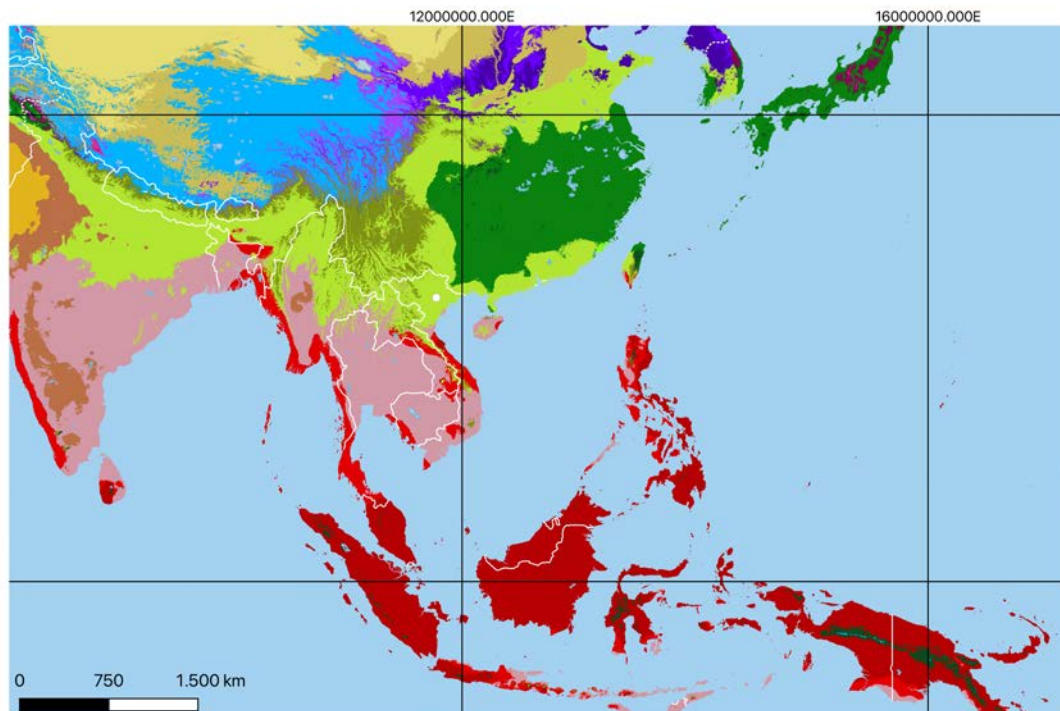

### Köppen profile of *Ottelia balansae*

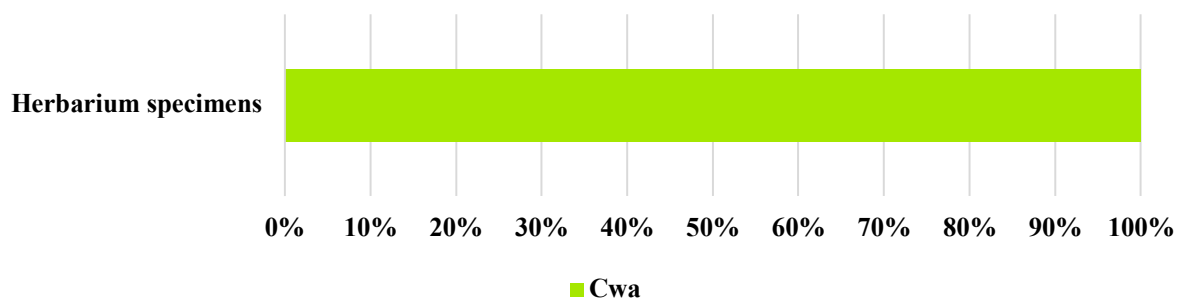

### Köppen profile of *Ottelia balansae*

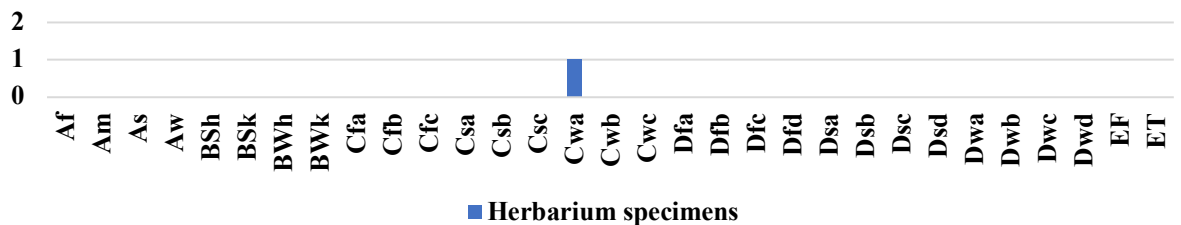

**5.2.3.2.4. Köppen profile, distribution and climate map** – GBIF occurrences of *Ottelia brasiliensis* Walp. 1852; herbarium specimens excluding duplicate occurrences (n = 47).

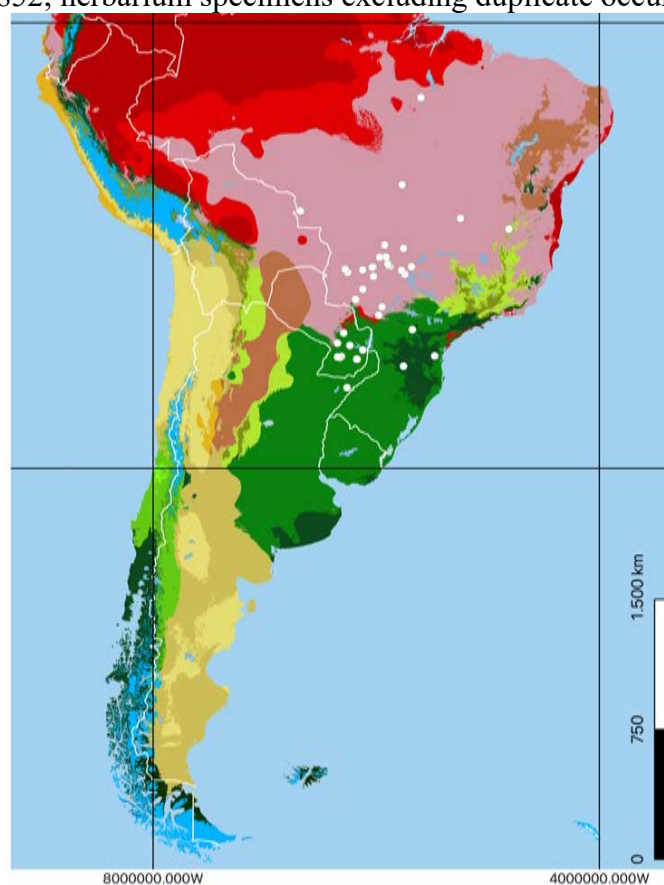

### Köppen profile of *Ottelia brasiliensis*

Herbarium specimens

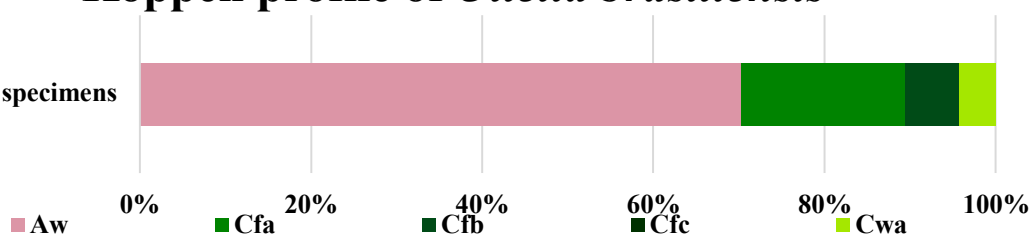

### Köppen profile of *Ottelia brasiliensis*

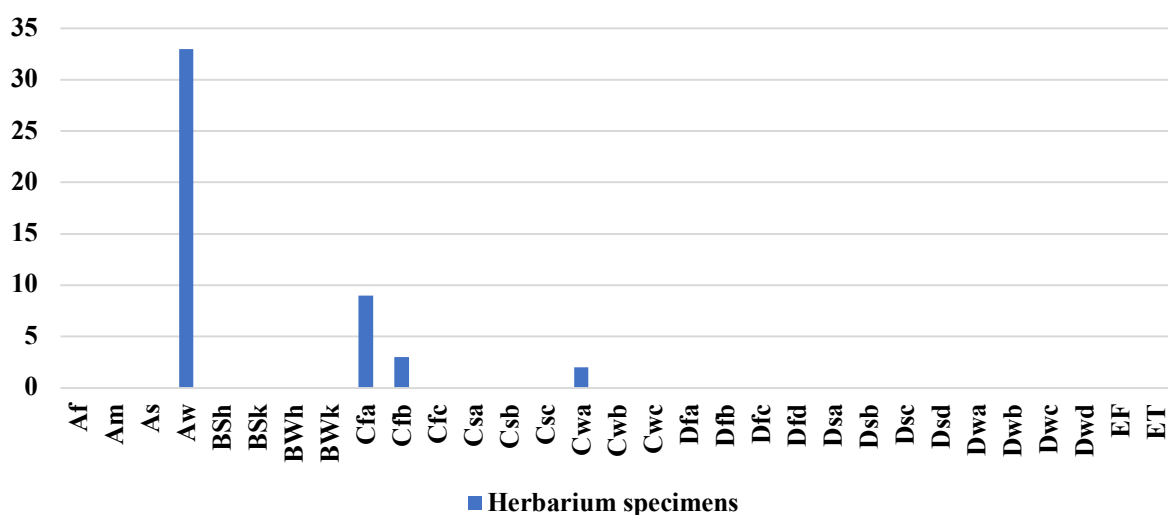

**5.2.3.2.5. Köppen profile, distribution and climate map** – GBIF occurrences of *Ottelia cordata* (Wall. 1830) Dandy 1934; herbarium specimens excluding duplicate occurrences (n = 1).

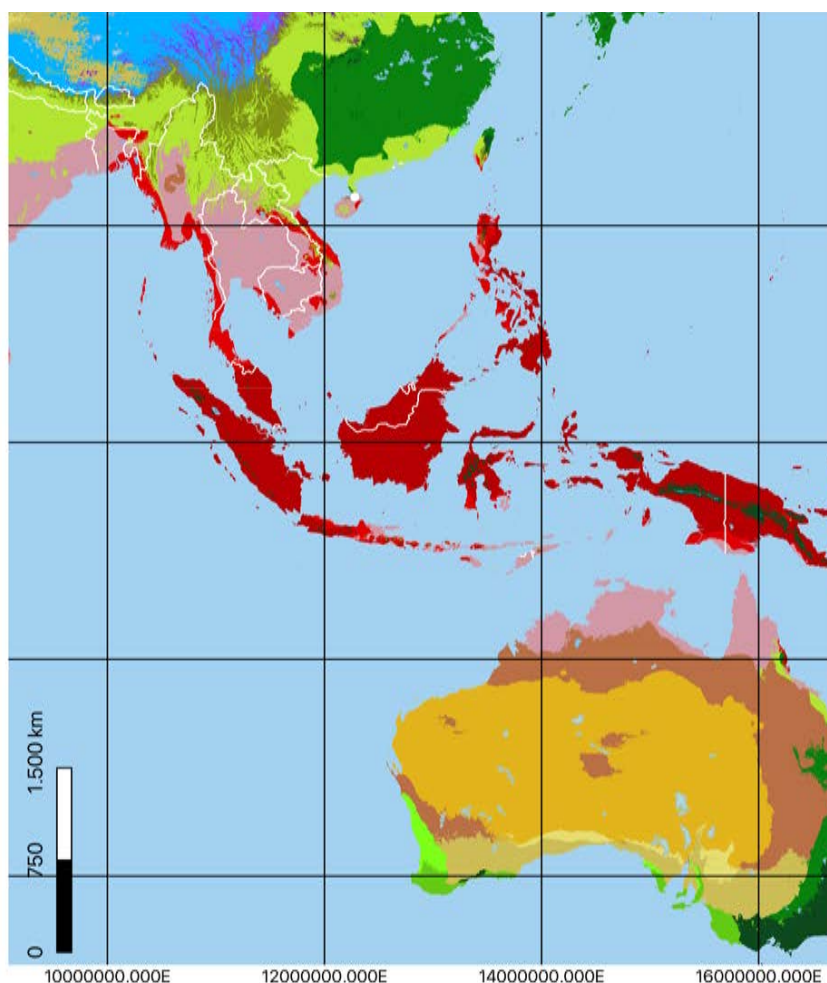

### Köppen profile of *Ottelia cordata*

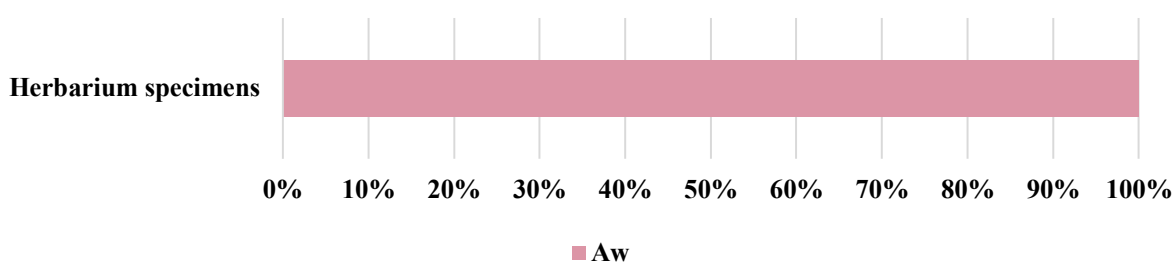

### Köppen profile of *Ottelia cordata*

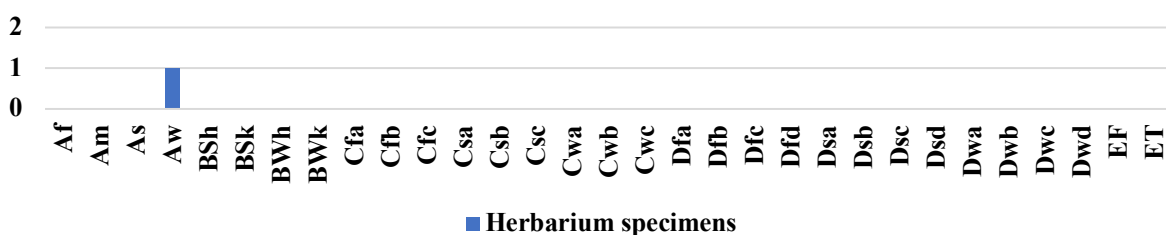

**5.2.3.2.6. Köppen profile, distribution and climate map** – GBIF occurrences of *Ottelia cylindrica* (T.C.E.Fr.) Dandy 1934; herbarium specimens excluding duplicate occurrences (n = 3).

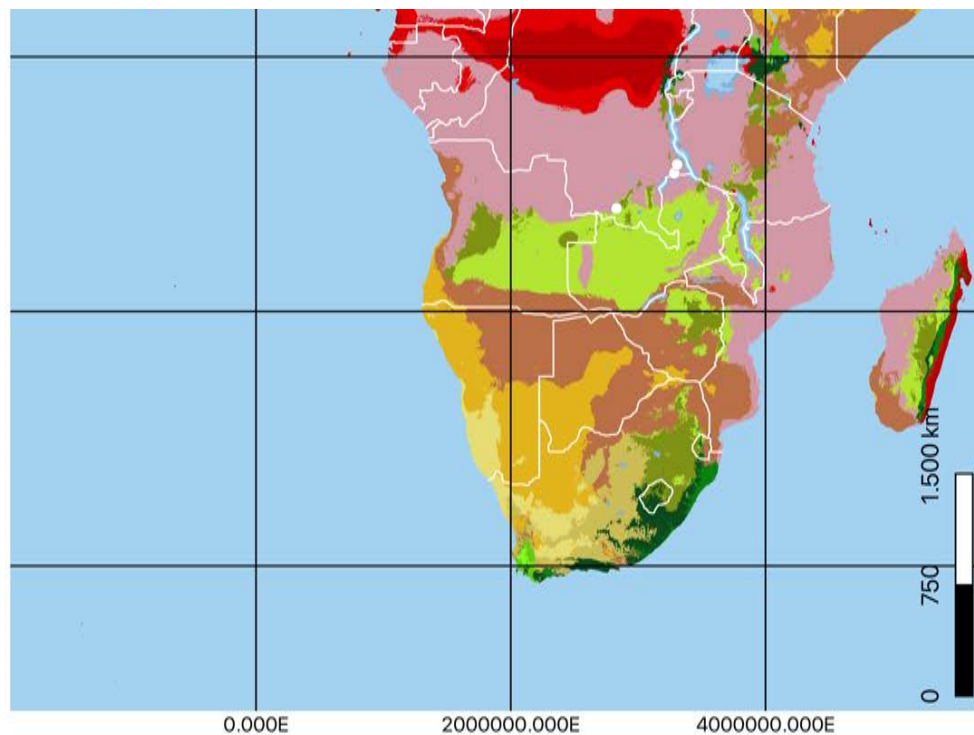

### Köppen profile of *Ottelia cylindrica*

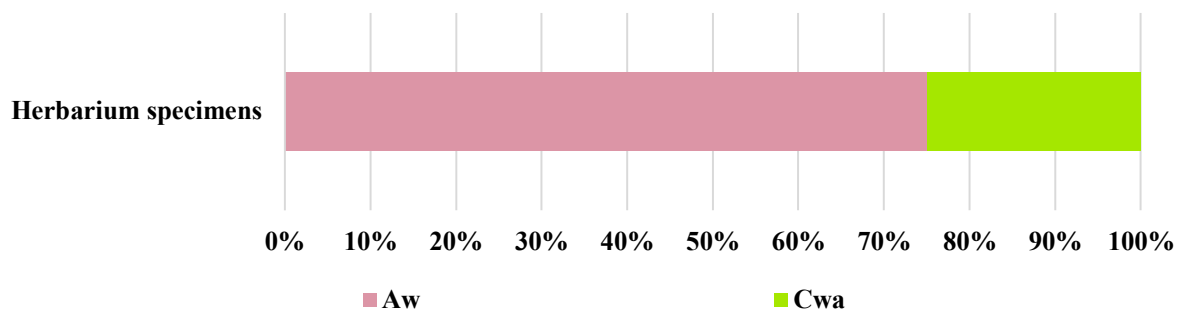

### Köppen profile of *Ottelia cylindrica*

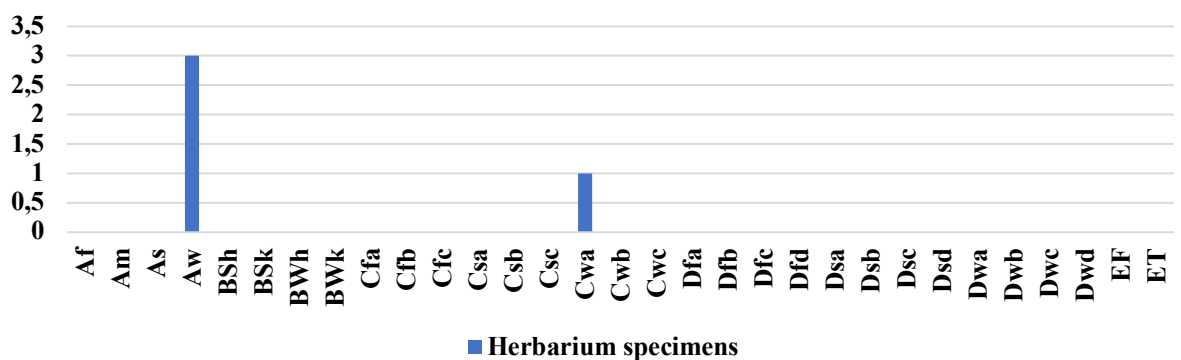

**5.2.3.2.7. Köppen profile, distribution and climate map** – GBIF occurrences of *Ottelia exserta* (Ridl. 1886) Dandy 1934; herbarium specimens excluding duplicate occurrences (n = 17).

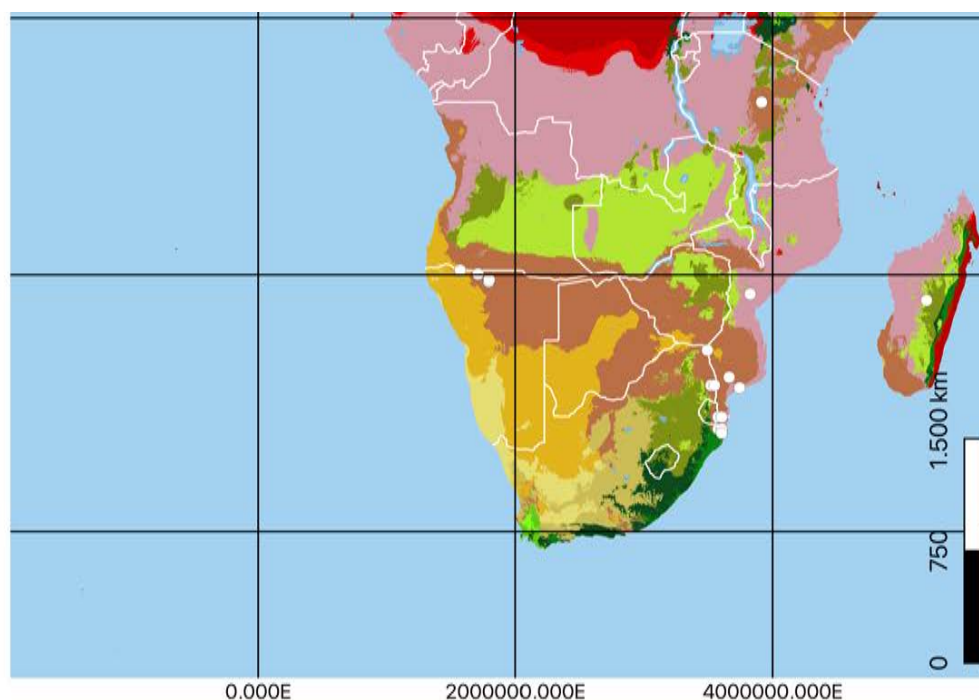

### Köppen profile of *Ottelia exserta*

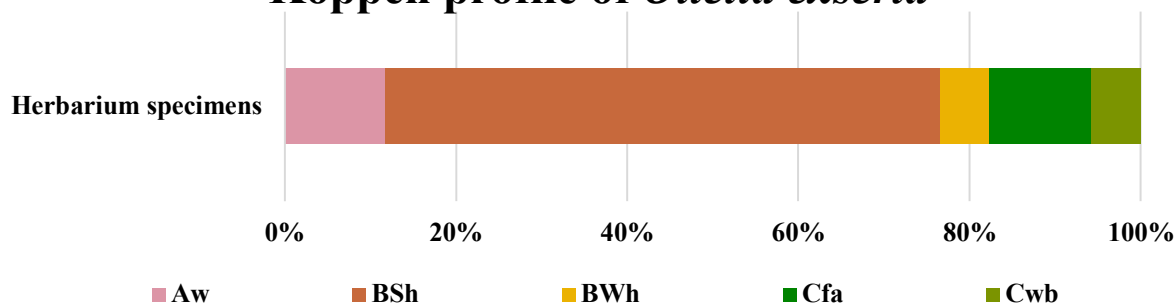

### Köppen profile of *Ottelia exserta*

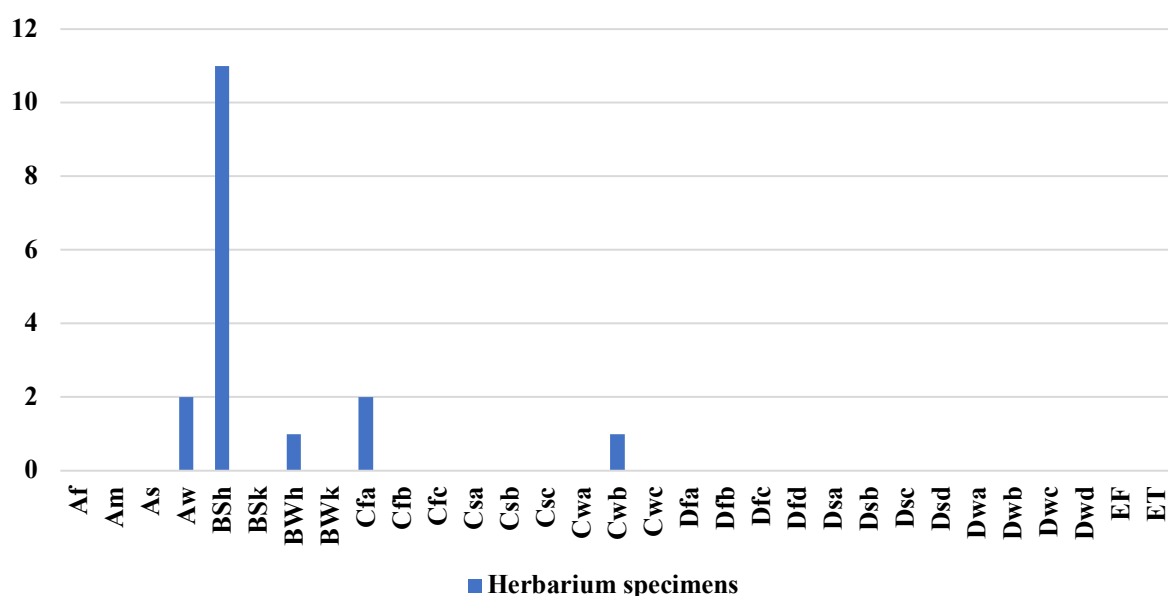

**5.2.3.2.8. Köppen profile, distribution and climate map** – GBIF occurrences of *Ottelia fischeri* (Gürke 1895) Dandy 1934; herbarium specimens excluding duplicate occurrences (n = 1).

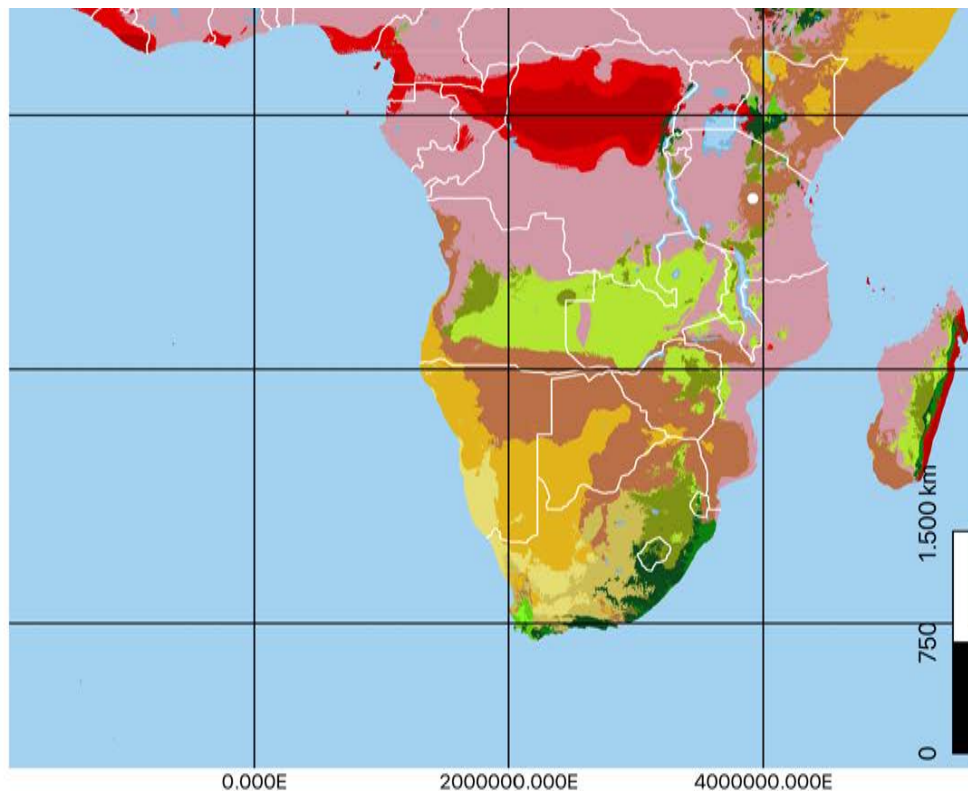

### Köppen profile of *Ottelia fischeri*

Herbarium specimens

0% 20% 40% 60% 80% 100%

■ BSh

### Köppen profile of *Ottelia fischeri*

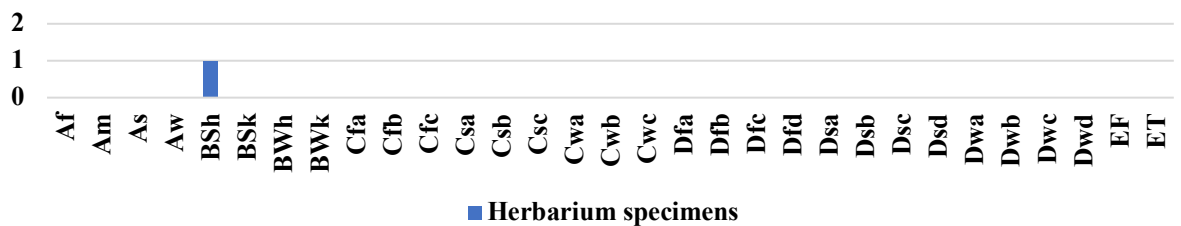

**5.2.3.2.9. Köppen profile, distribution and climate map** – GBIF occurrences of *Ottelia kunenensis* (Gürke 1895) Dandy 1934; herbarium specimens excluding duplicate occurrences (n = 14).

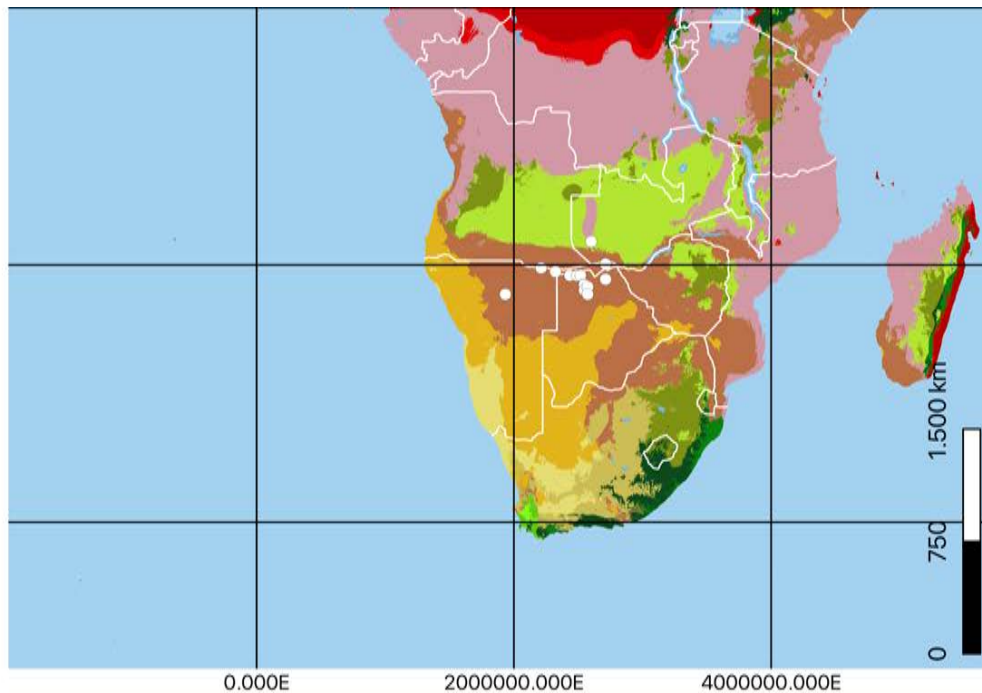

**Köppen profile of *Ottelia kunenensis***

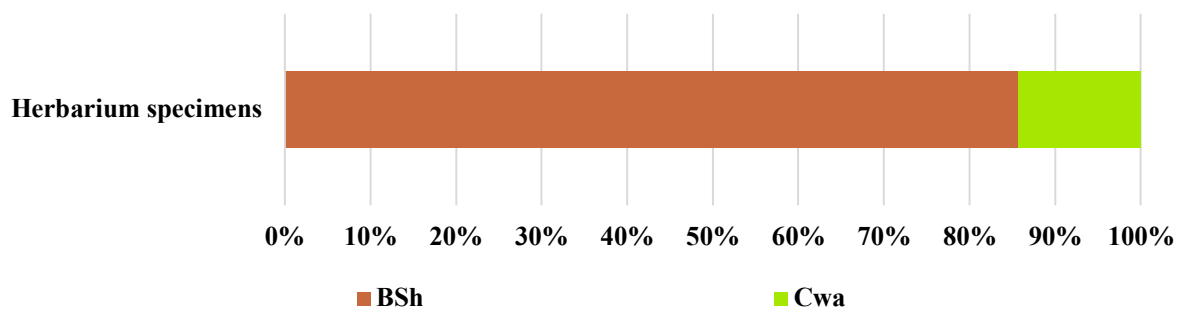

**Köppen profile of *Ottelia kunenensis***

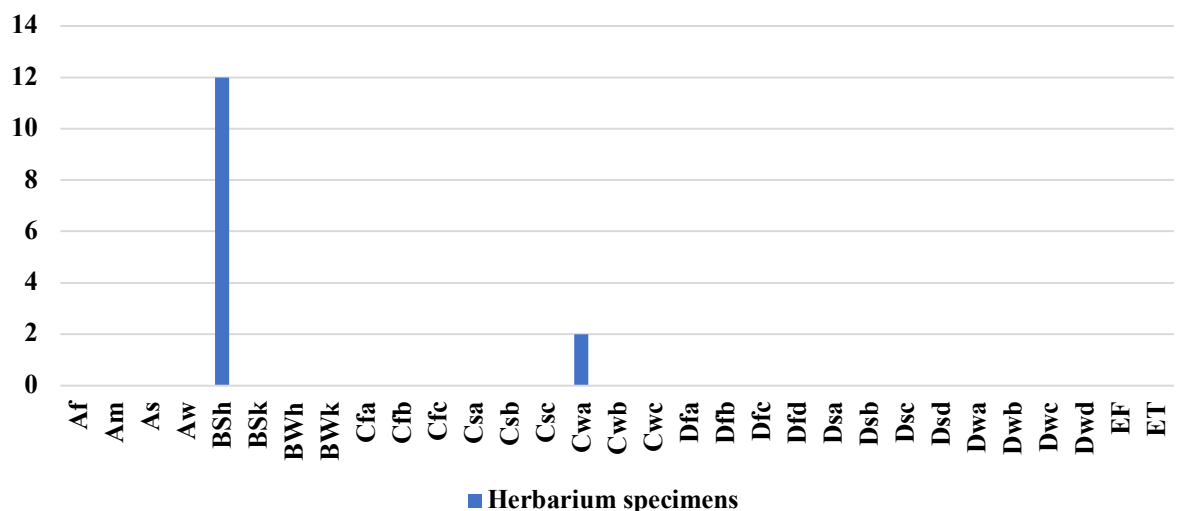

**5.2.3.2.10. Köppen profile, distribution and climate map** – GBIF occurrences of *Ottelia mesenterium* (Hallier f. 1915) Hartog 1957; herbarium specimens excluding duplicate occurrences (n = 8).

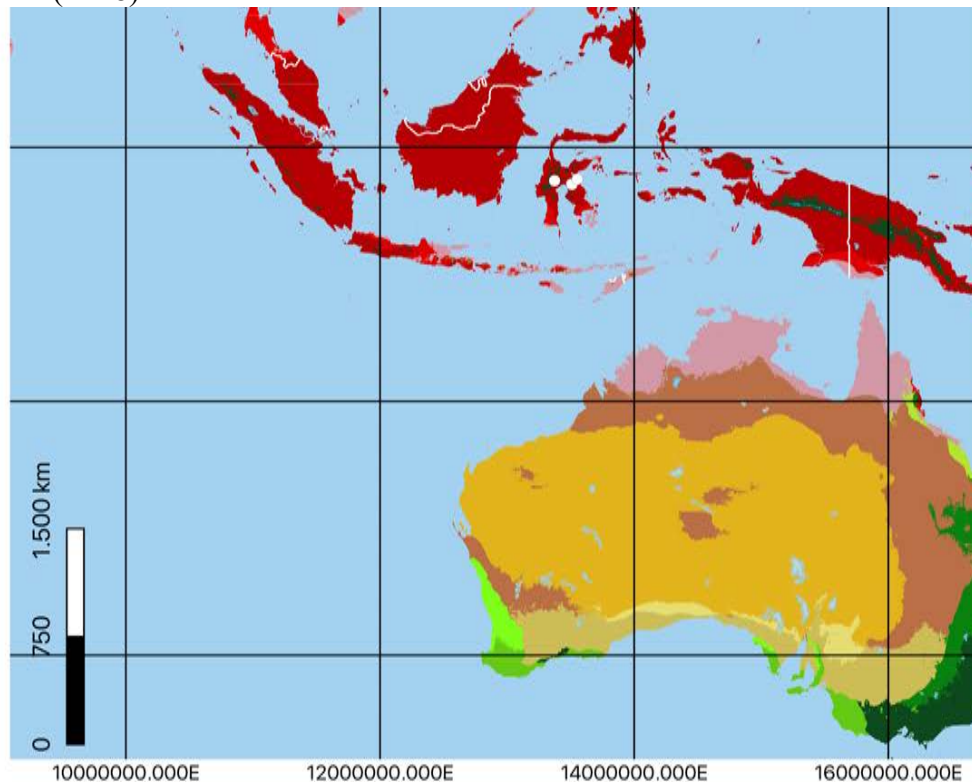

### Köppen profile of *Ottelia mesenterium*

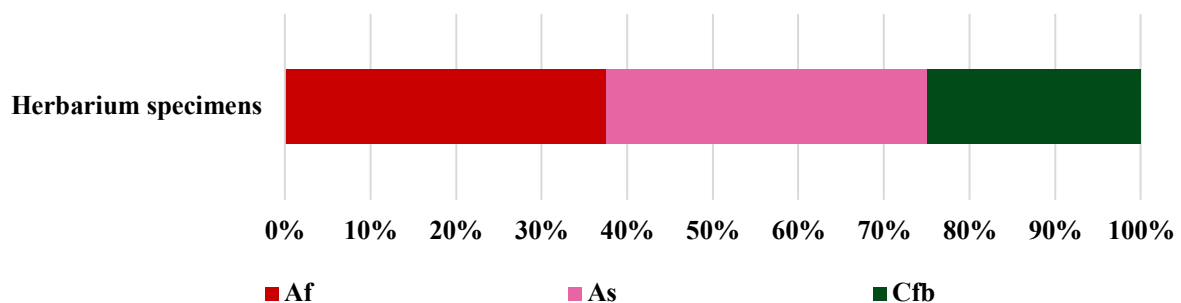

### Köppen profile of *Ottelia mesenterium*

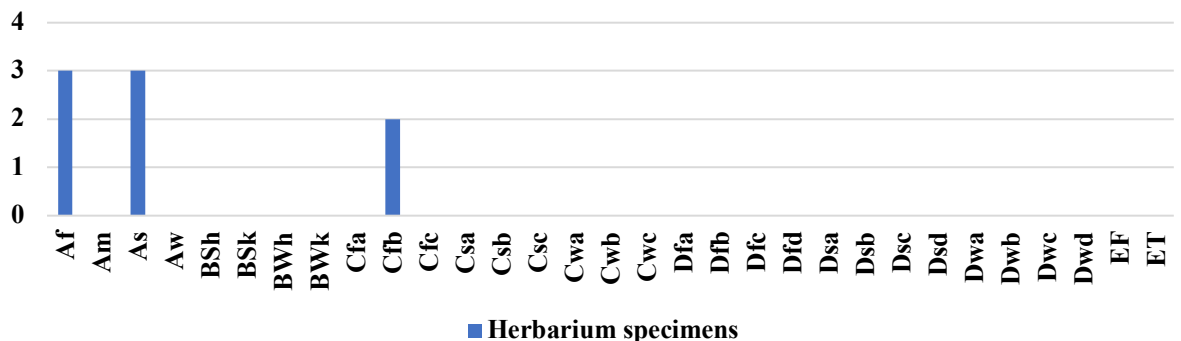

**5.2.3.2.11. Köppen profile, distribution and climate map – GBIF occurrences of *Ottelia muricata* (C.H.Wright 1898) Dandy 1934; herbarium specimens excluding duplicate occurrences (n = 16).**

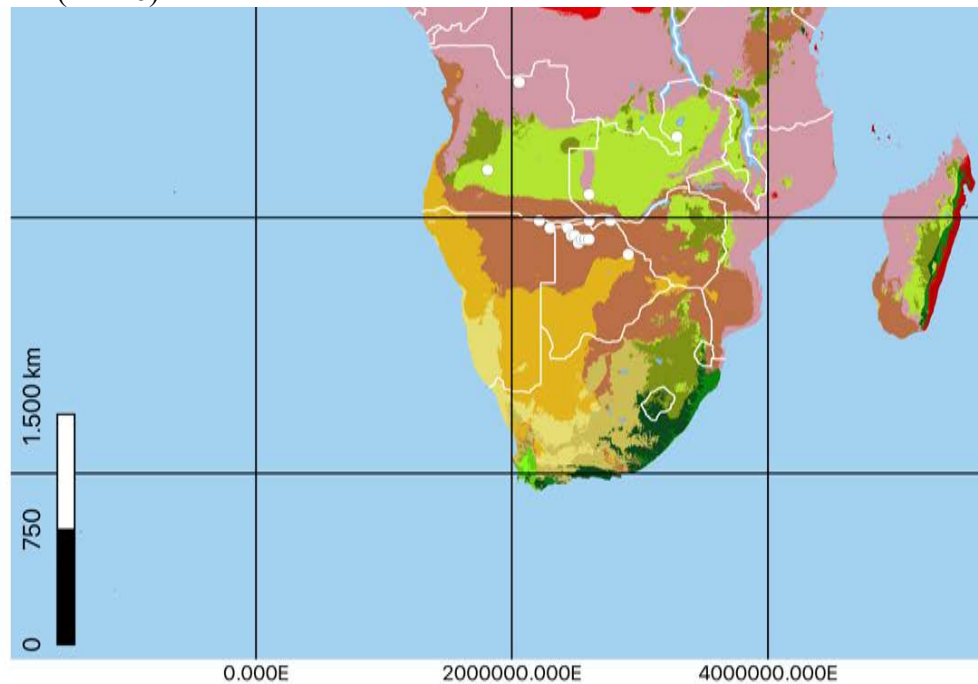

**Köppen profile of *Ottelia muricata***

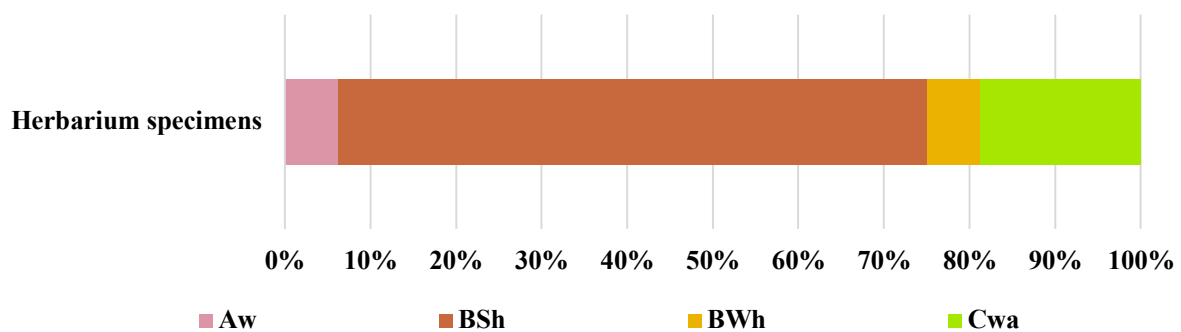

**Köppen profile of *Ottelia muricata***

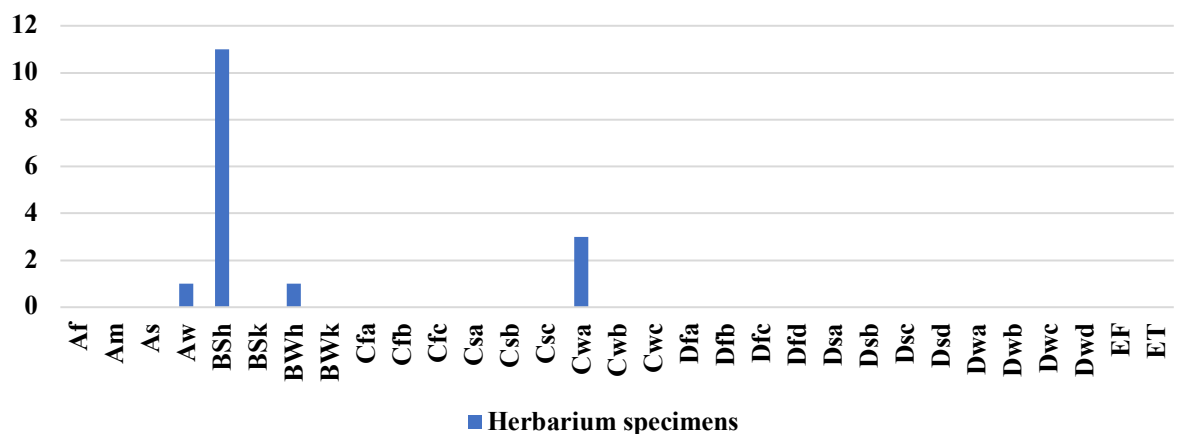

**5.2.3.2.12. Köppen profile, distribution and climate map – GBIF occurrences of *Ottelia ovalifolia* (R.Br. 1810) Rich. 1814; herbarium specimens excluding duplicate occurrences (n = 661).**

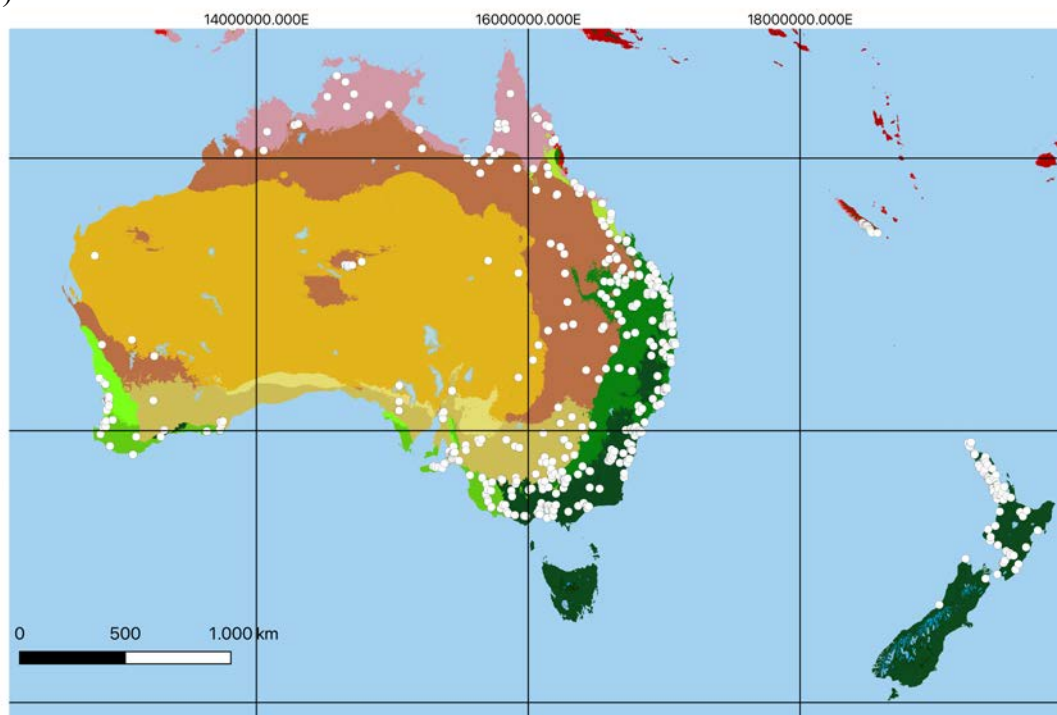

**Köppen profile of *Ottelia ovalifolia***

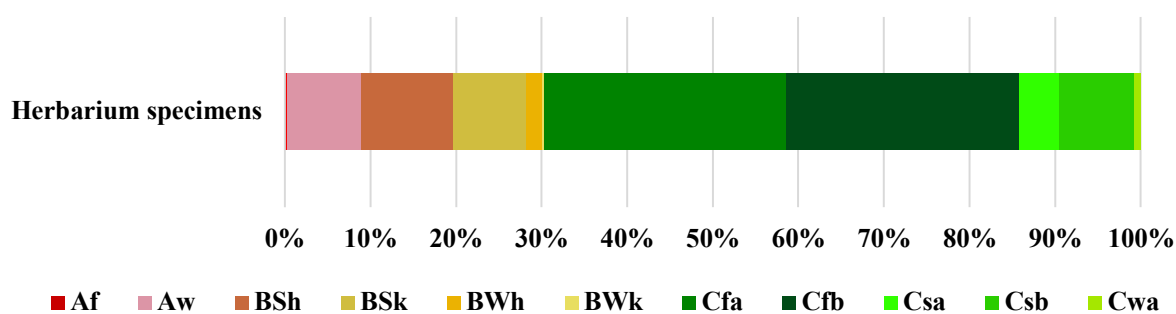

## Köppen profile of *Ottelia ovalifolia*

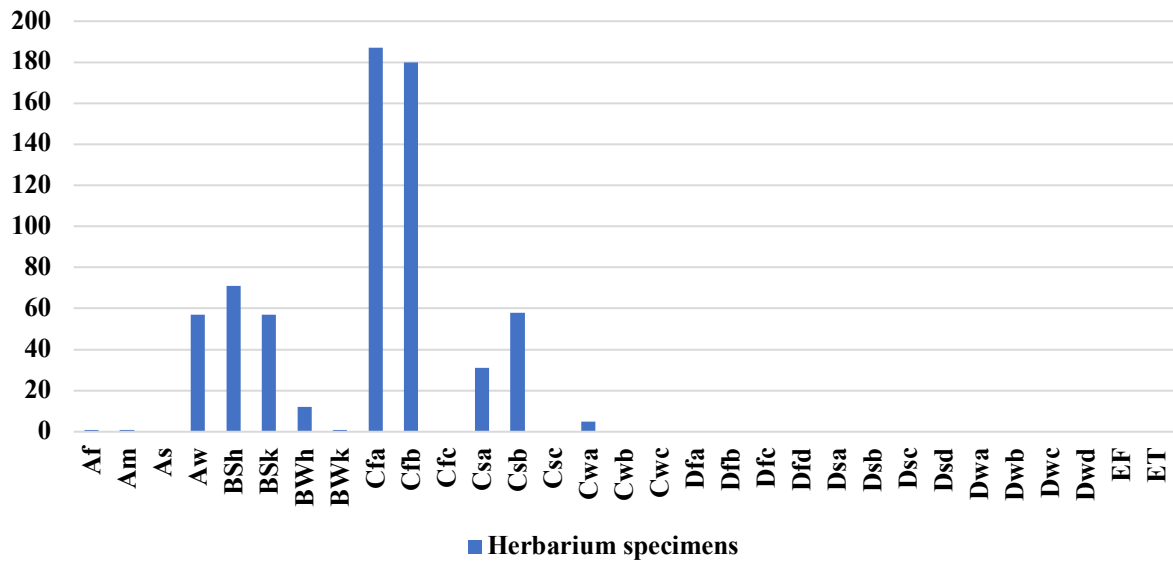

**5.2.3.2.13. Köppen profile, distribution and climate map** – GBIF occurrences of *Ottelia ulvifolia* (Planch. 1849) Walp. 1852; herbarium specimens excluding duplicate occurrences (n = 143).

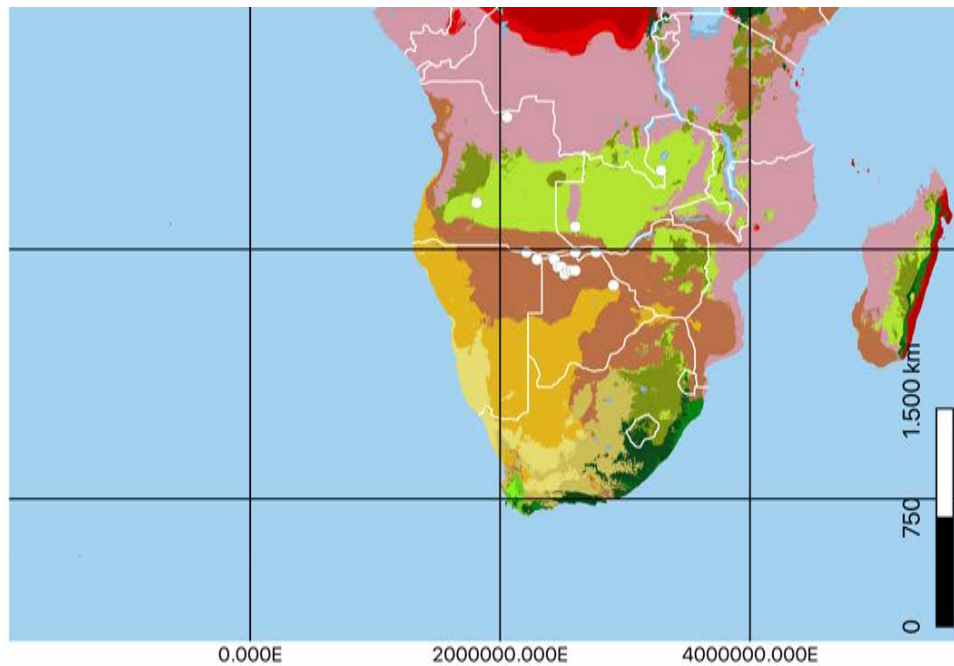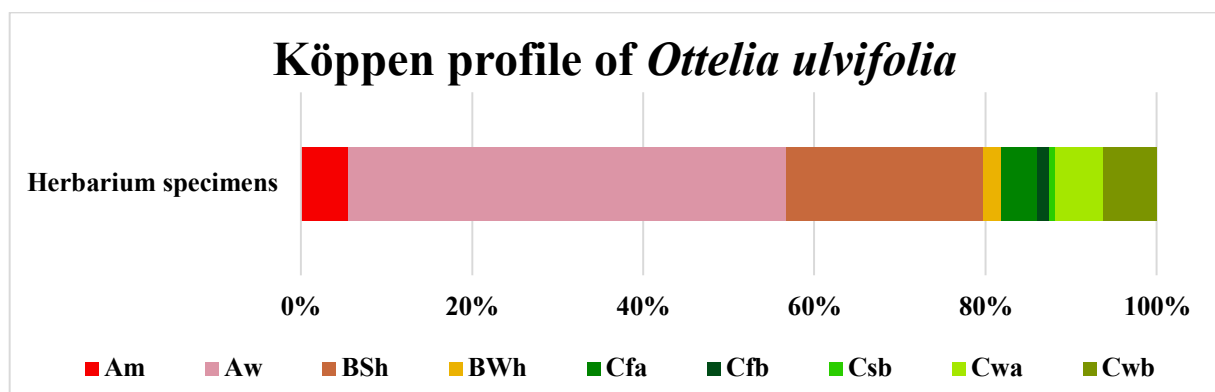

Köppen profile of *Ottelia ulvifolia*

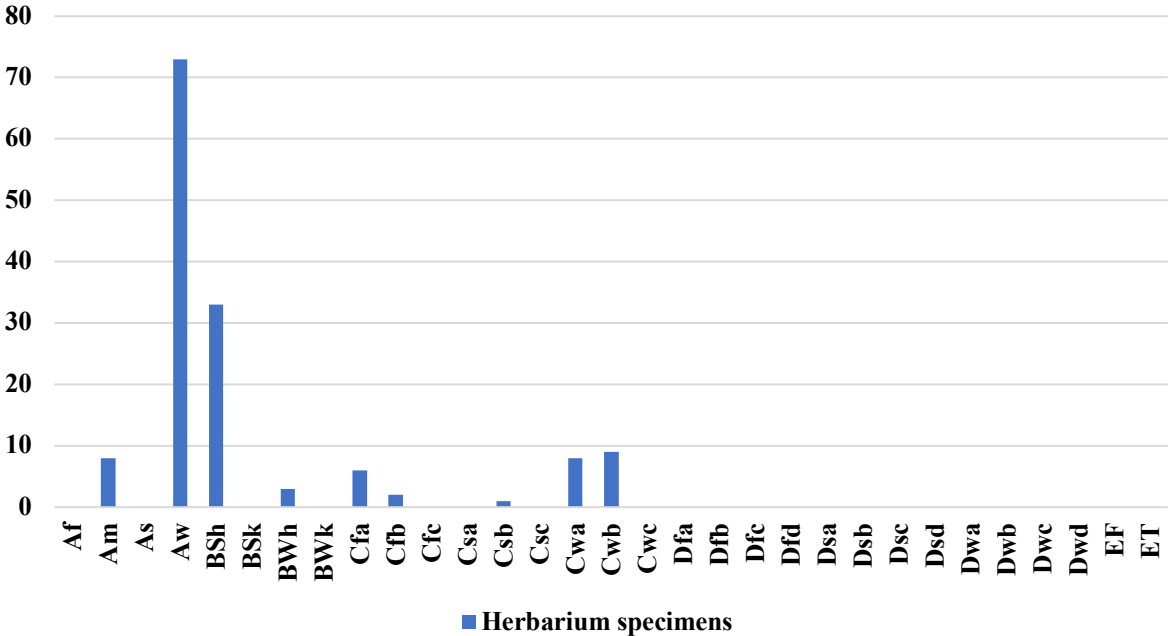

**5.2.3.2.14. Köppen profile, distribution and climate map – GBIF occurrences of *Ottelia verdickii* Gürke ex De Wild., 1903; herbarium specimens excluding duplicate occurrences (n = 7).**

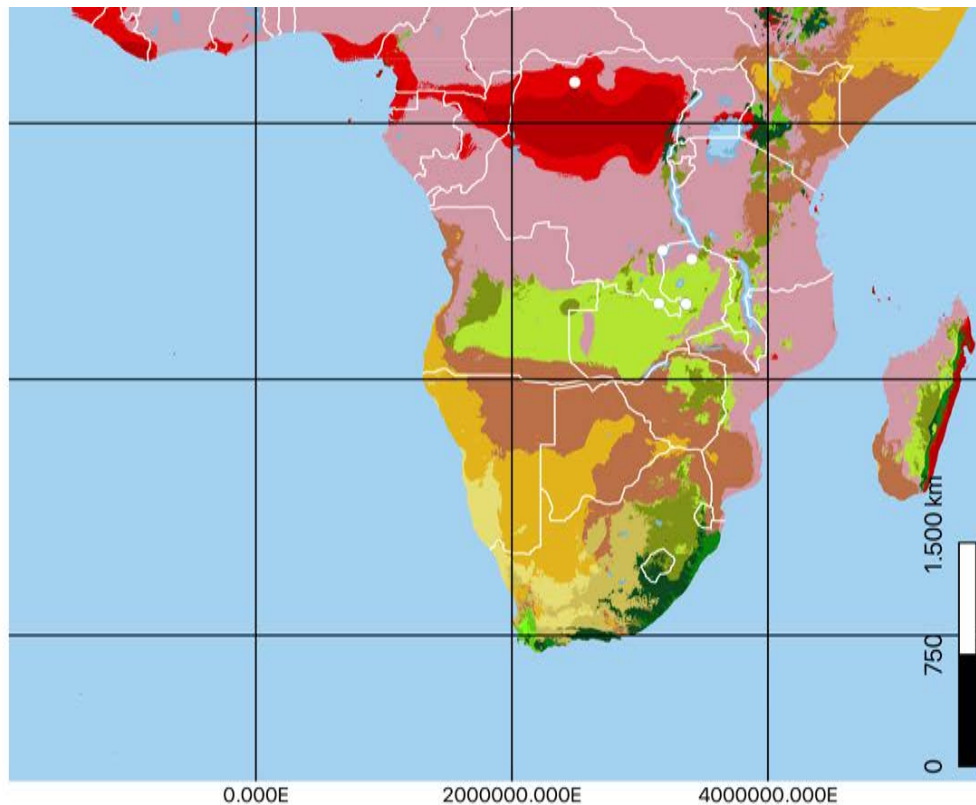

**Köppen profile of *Ottelia verdickii***

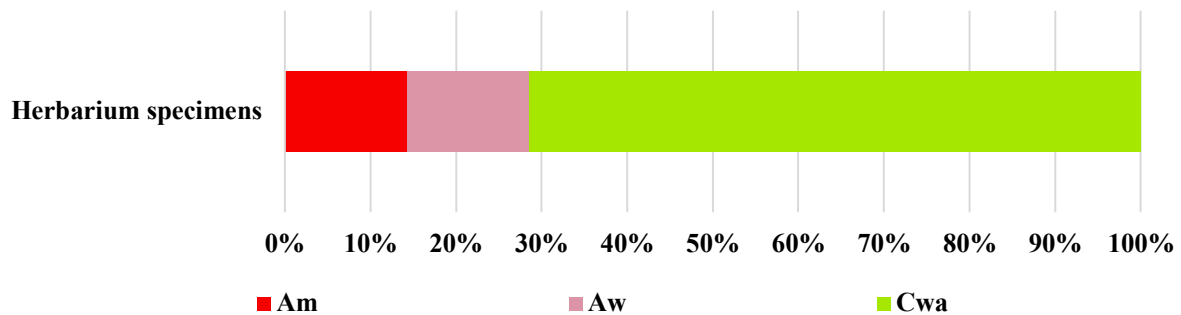

**Köppen profile of *Ottelia verdickii***

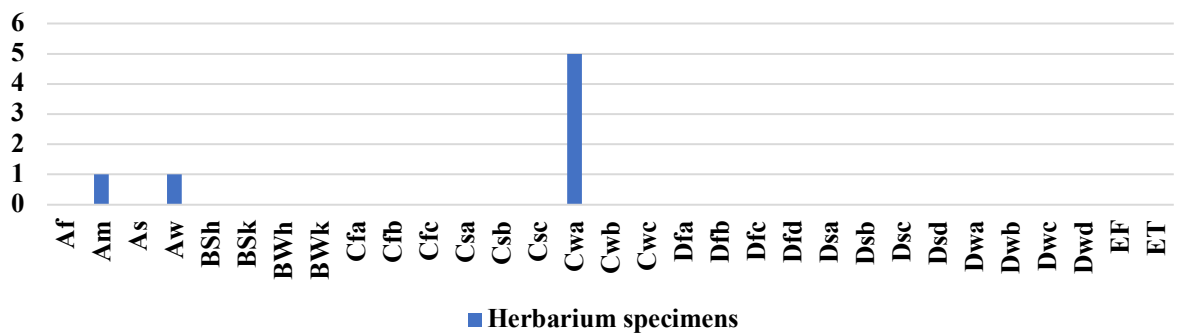

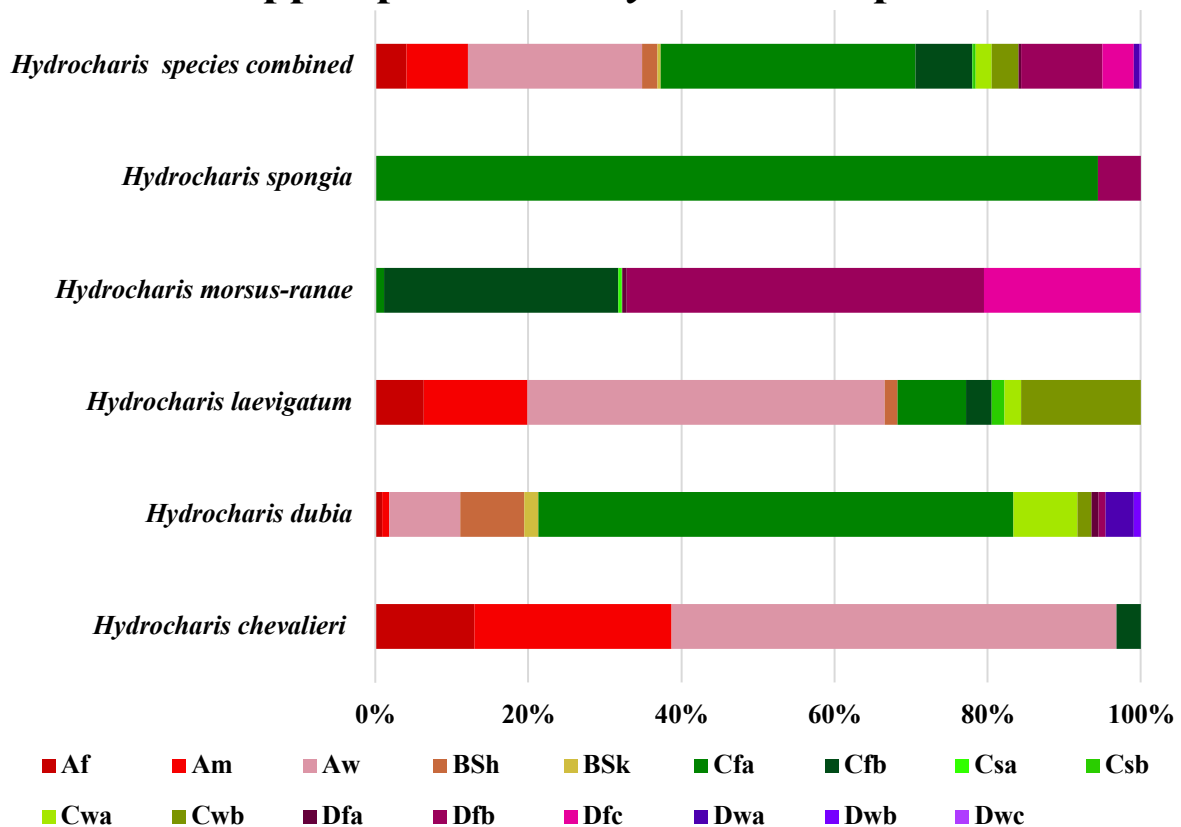

**5.3.1.1.1. Köppen profile, distribution and climate map**– GBIF occurrences of *Hydrocharis chevalieri* (De Wild. 1922) Dandy 1932; herbarium specimens excluding duplicate occurrences (n = 33).

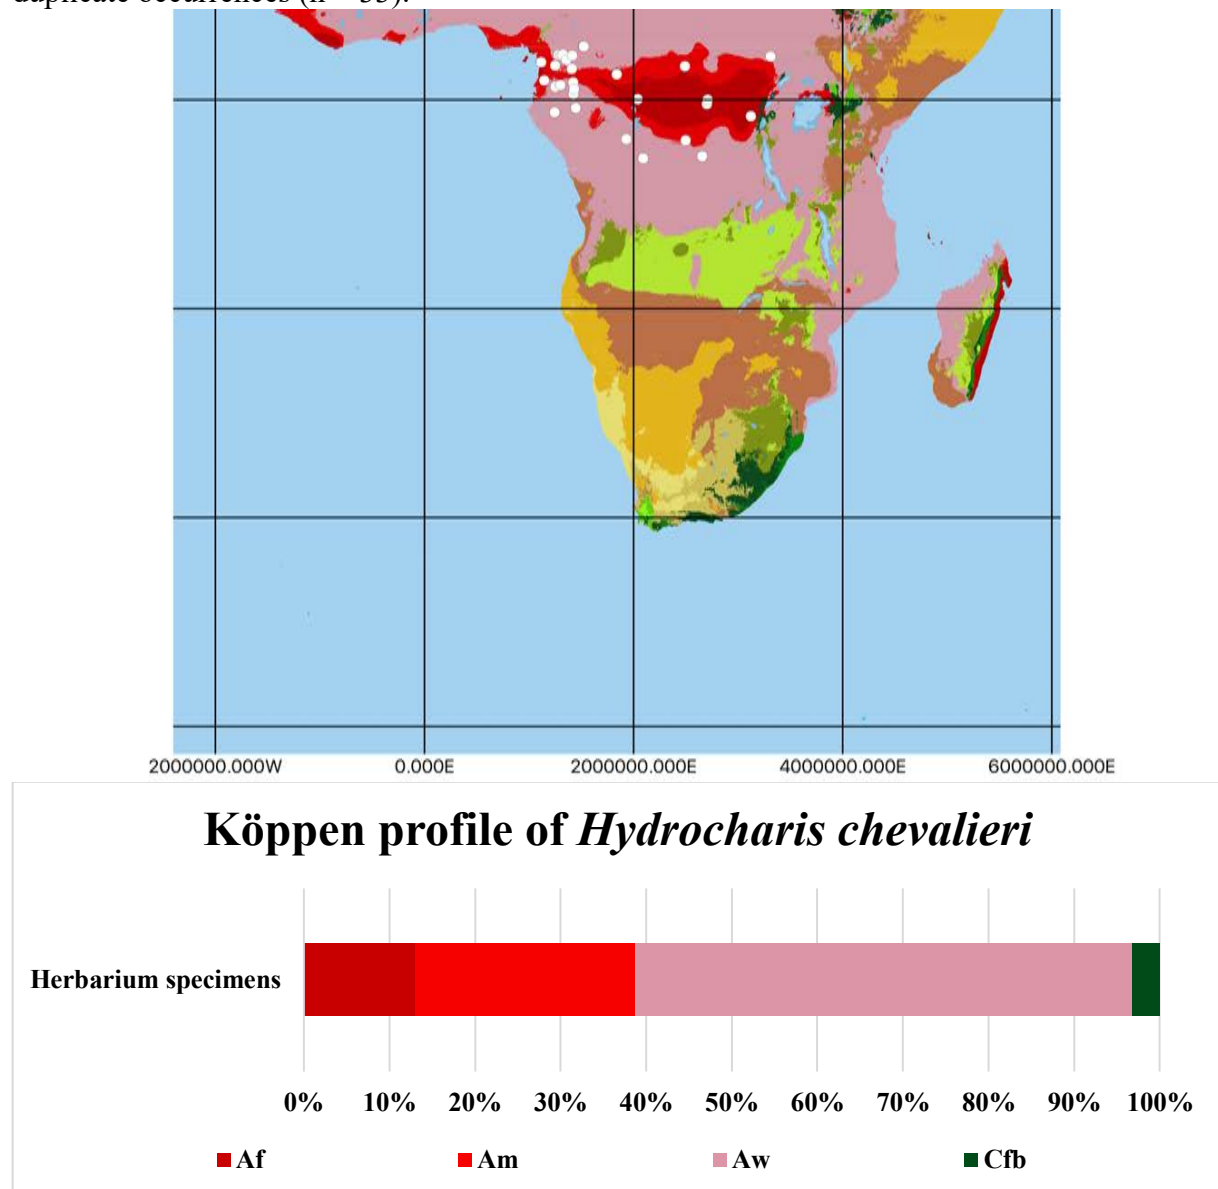

## Köppen profile of *Hydrocharis chevalieri*

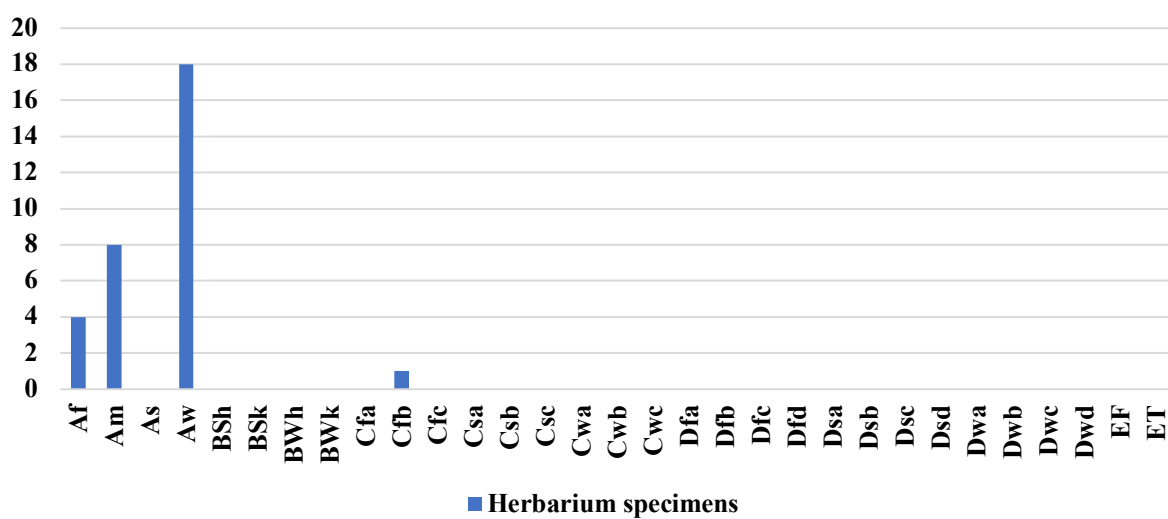

**5.3.1.1.2. Köppen profile, distribution and climate map**– GBIF occurrences of *Hydrocharis dubia* (Blume 1827) Backer 1925; herbarium specimens excluding duplicate occurrences (n = 108).

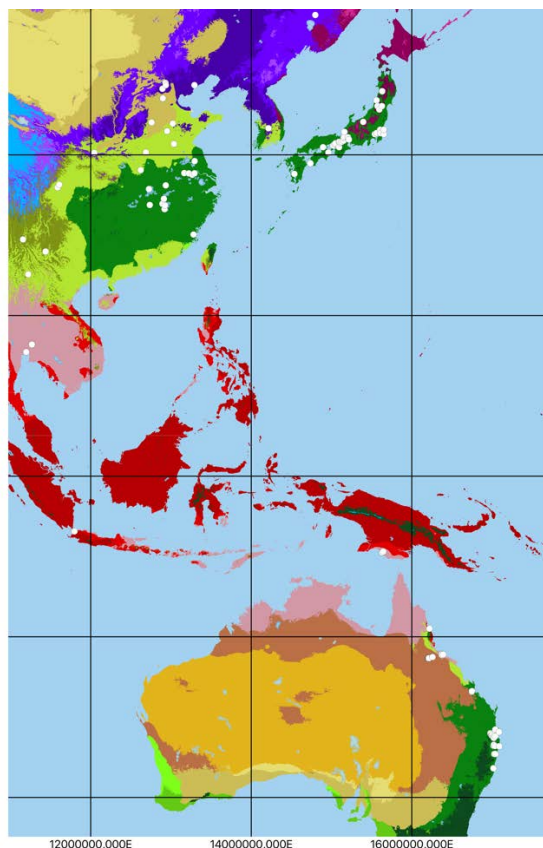

### Köppen profile of *Hydrocharis dubia*

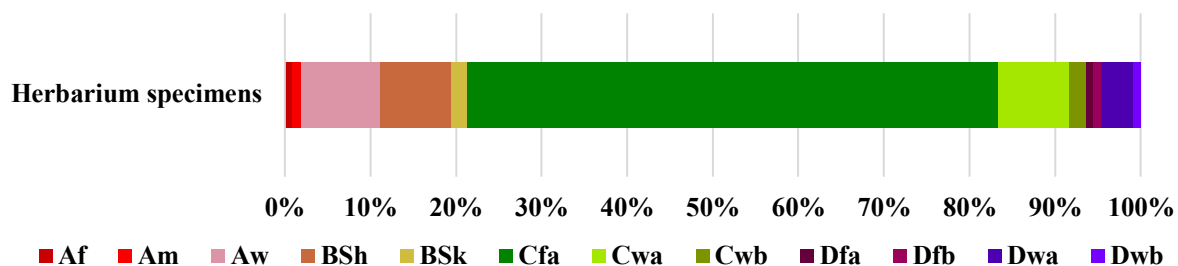

Köppen profile of *Hydrocharis dubia*

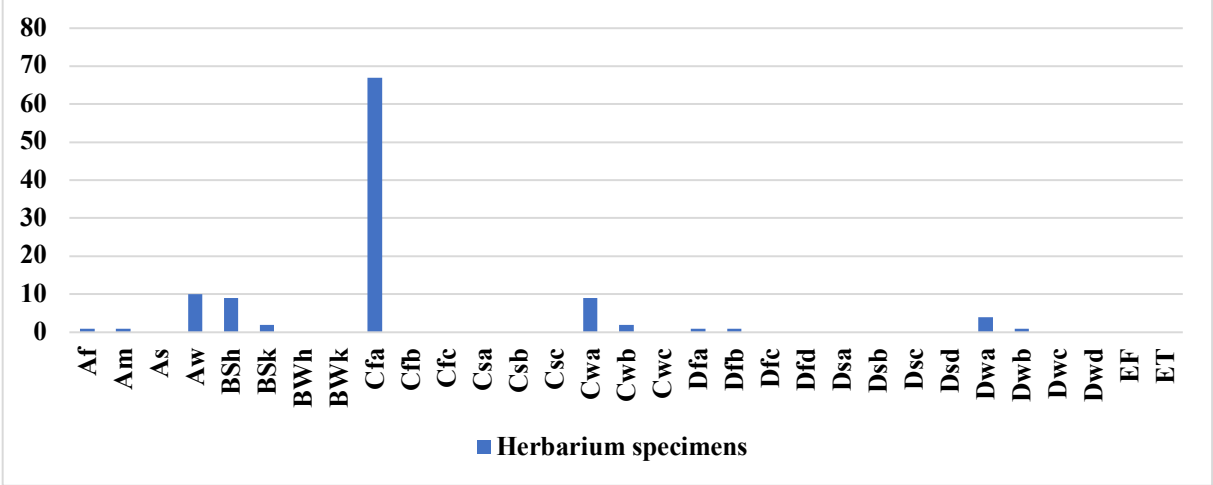

**5.3.1.1.3. Köppen profile, distribution and climate map**– GBIF occurrences of *Hydrocharis laevigata* (Humb. & Bonpl. ex Willd. 1810) Byng & Christenh. 2018; herbarium specimens excluding duplicate occurrences (n = 238).

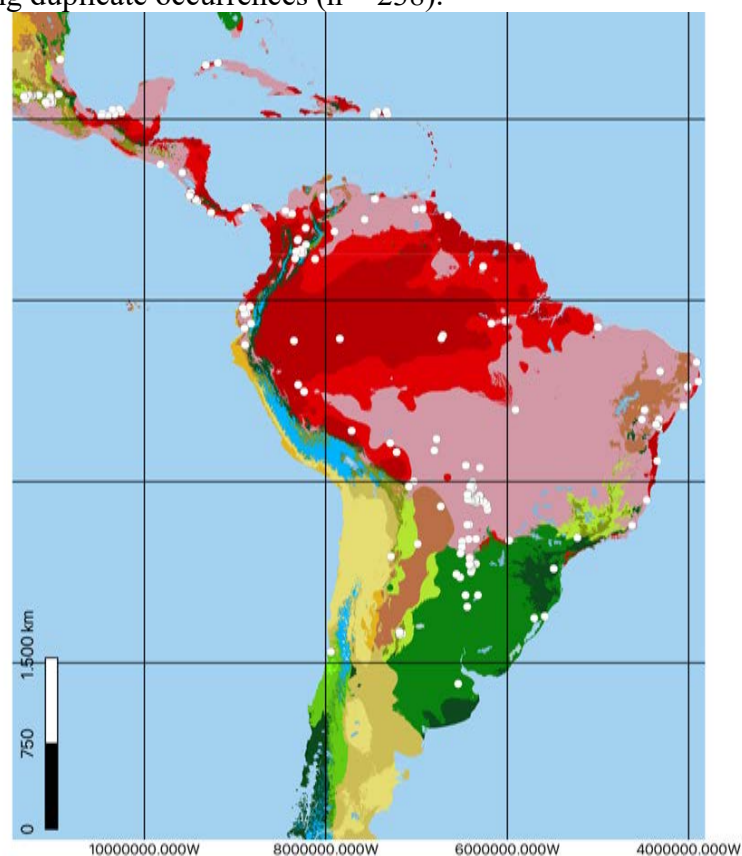

### Köppen profile of *Hydrocharis laevigatum*

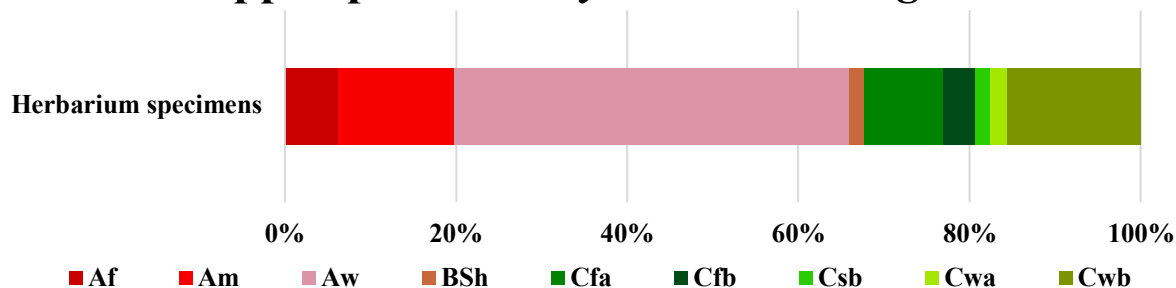

### Köppen profile of *Hydrocharis laevigatum*

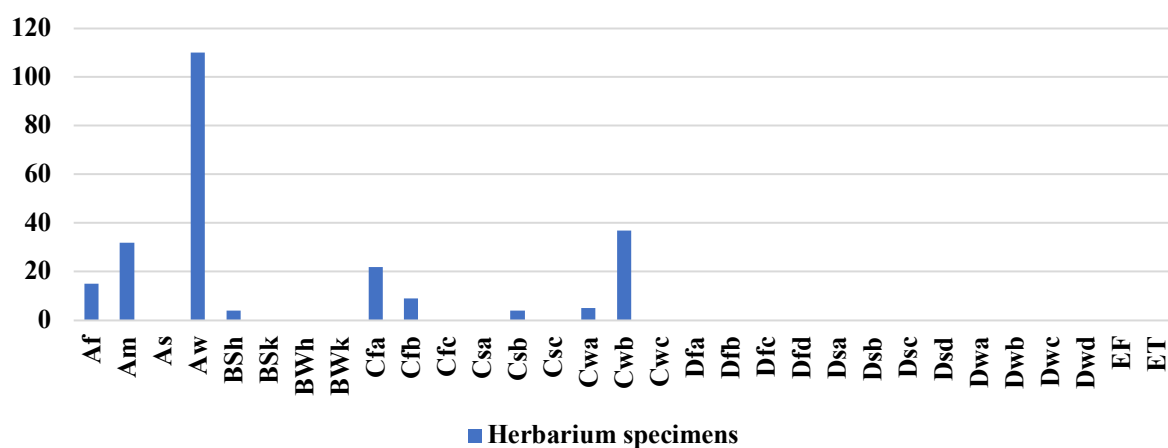

**5.3.1.1.4. Köppen profile, distribution and climate map** – GBIF occurrences of *Hydrocharis morsus-ranae* L. 1753; herbarium specimens excluding duplicate occurrences (n = 1138).

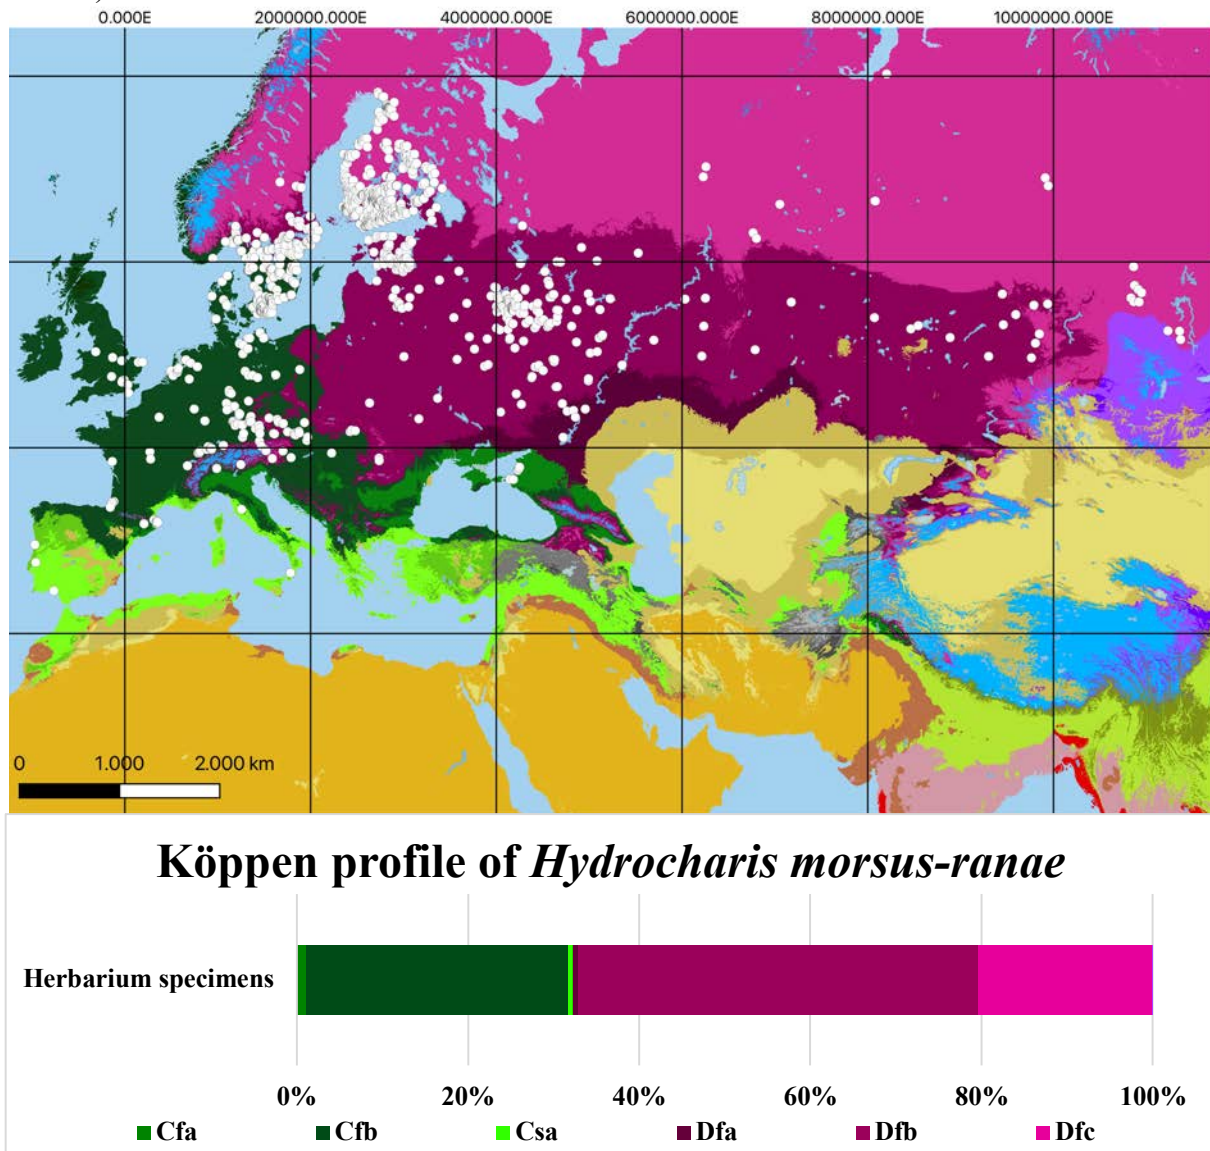

Köppen profile of *Hydrocharis morsus-ranae*

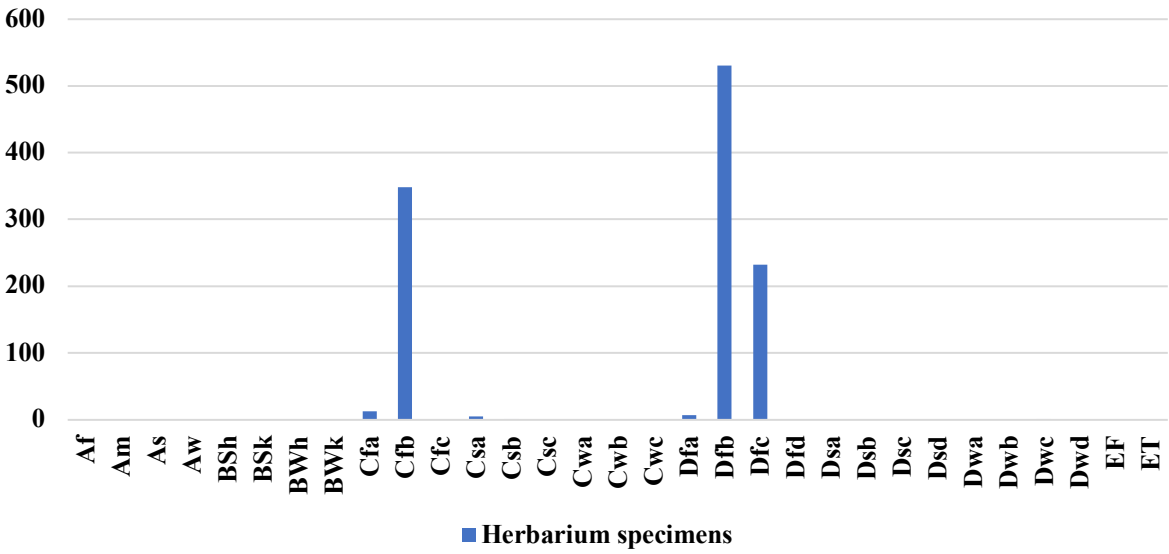

**5.3.1.1.5. Köppen profile, distribution and climate map** – GBIF occurrences of *Hydrocharis spongia* Bosc, 1807; herbarium specimens excluding duplicate occurrences (n = 71).

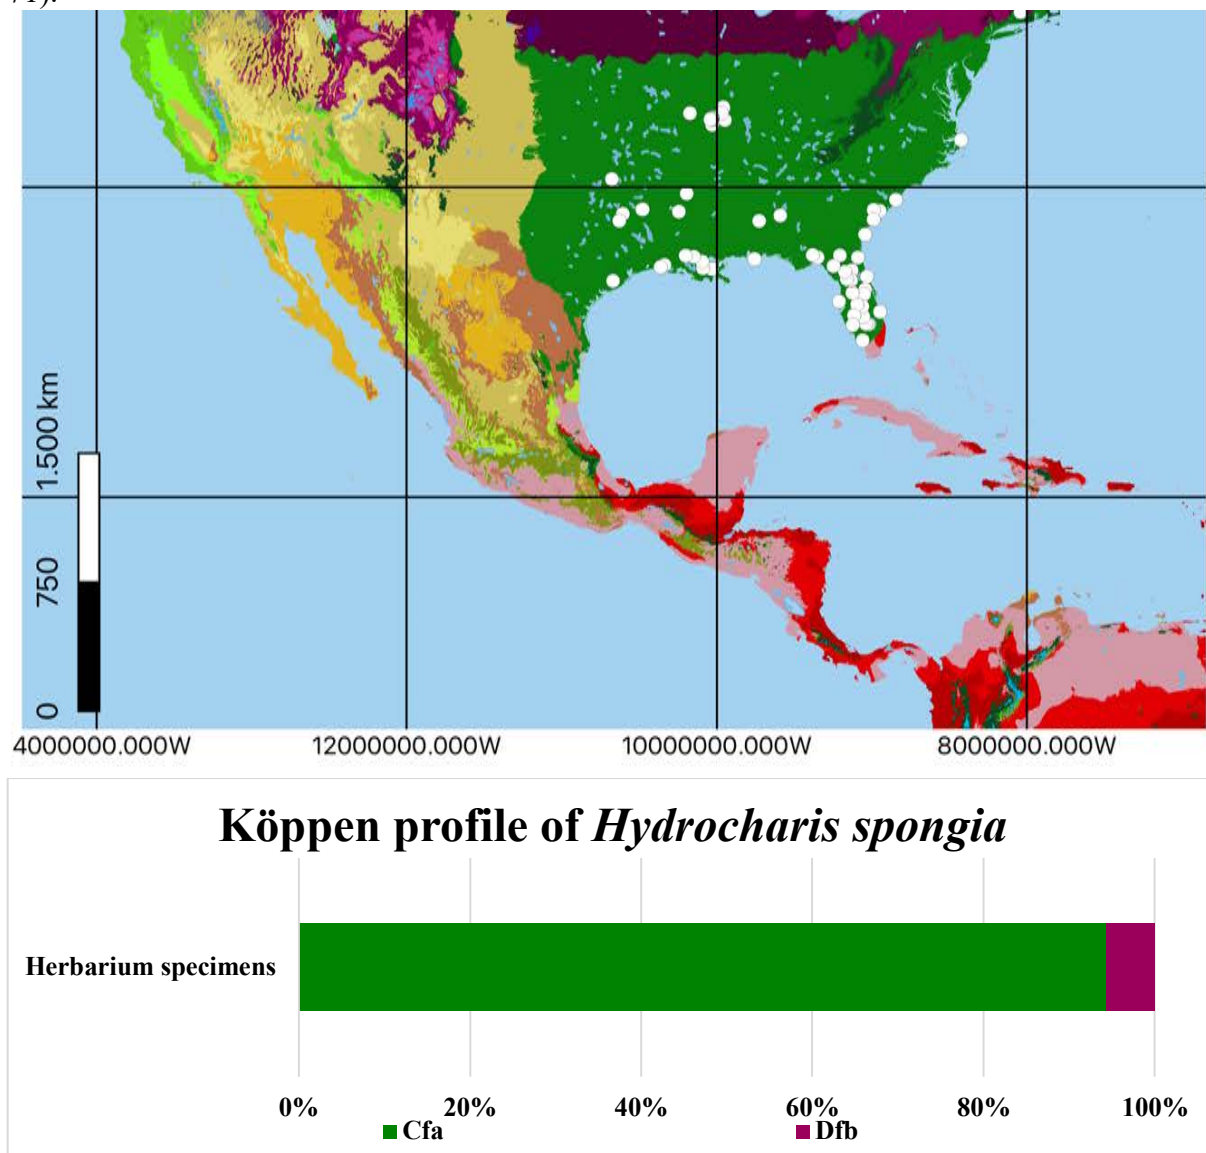

Köppen profile of *Hydrocharis spongia*

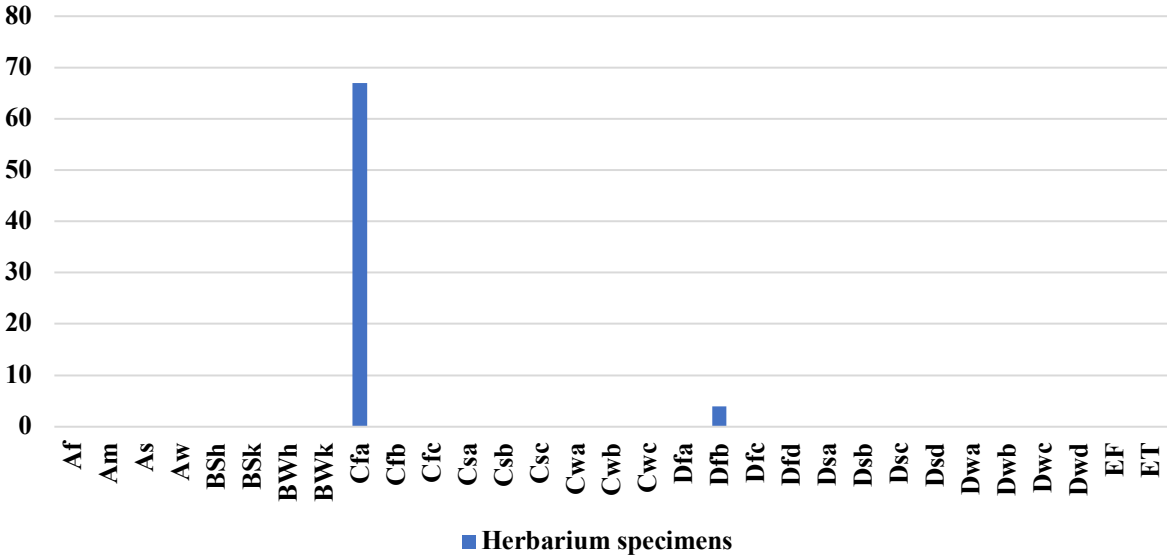

**5.3.2. Second diverging genus within Clade A of Hydrocharitaceae** cf. Chen et. al (2012), comprising *Enhalus* Rich. 1811, *Halophia* Thouars 1806, and *Thalassia* Banks ex K.D.Koenig 1805

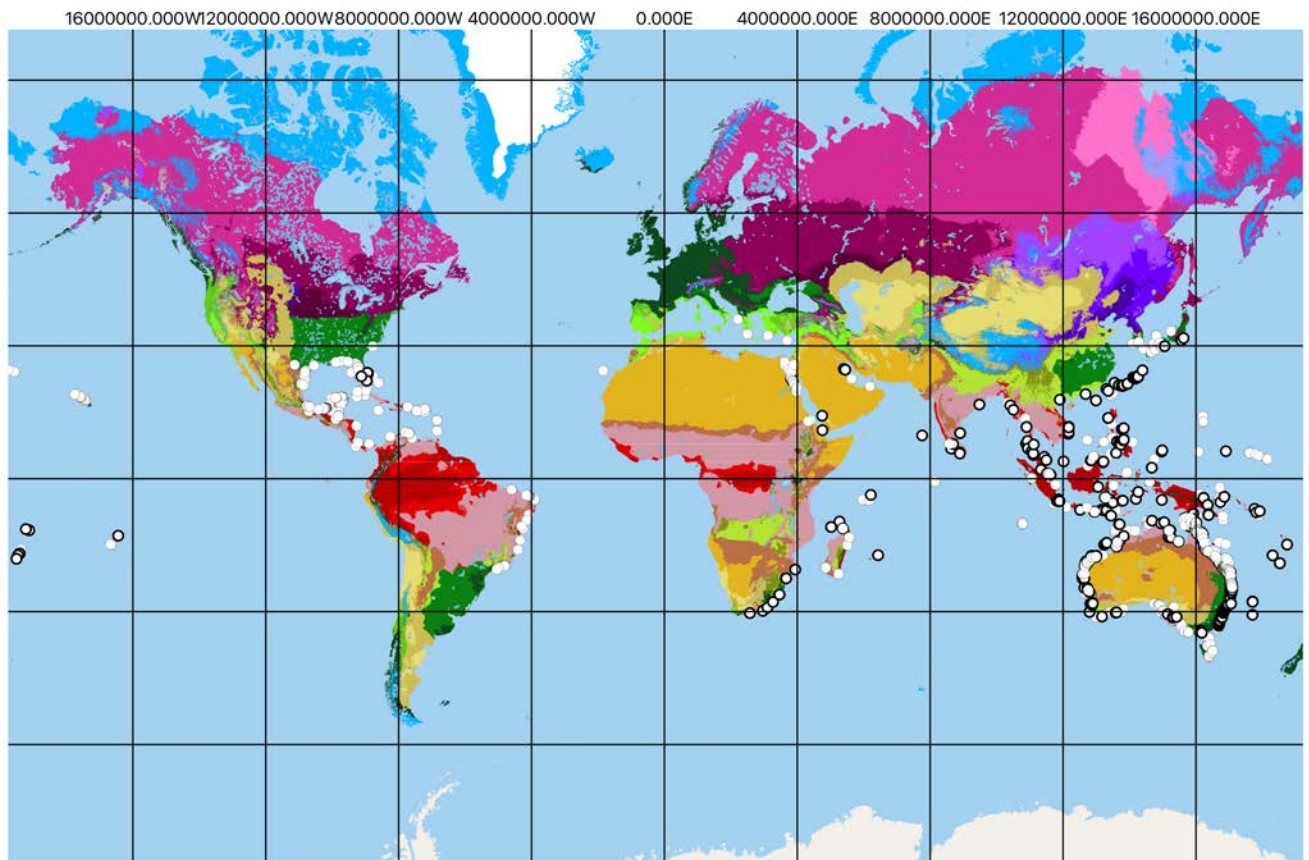

### 5.3.2.1. Genus *Enhalus* Rich. 1811.

**Köppen profile, distribution and climate map** – GBIF occurrences of *Enhalus acoroides* (L.f. 1782) Royle 1839; herbarium specimens excluding duplicate occurrences (n = 102).

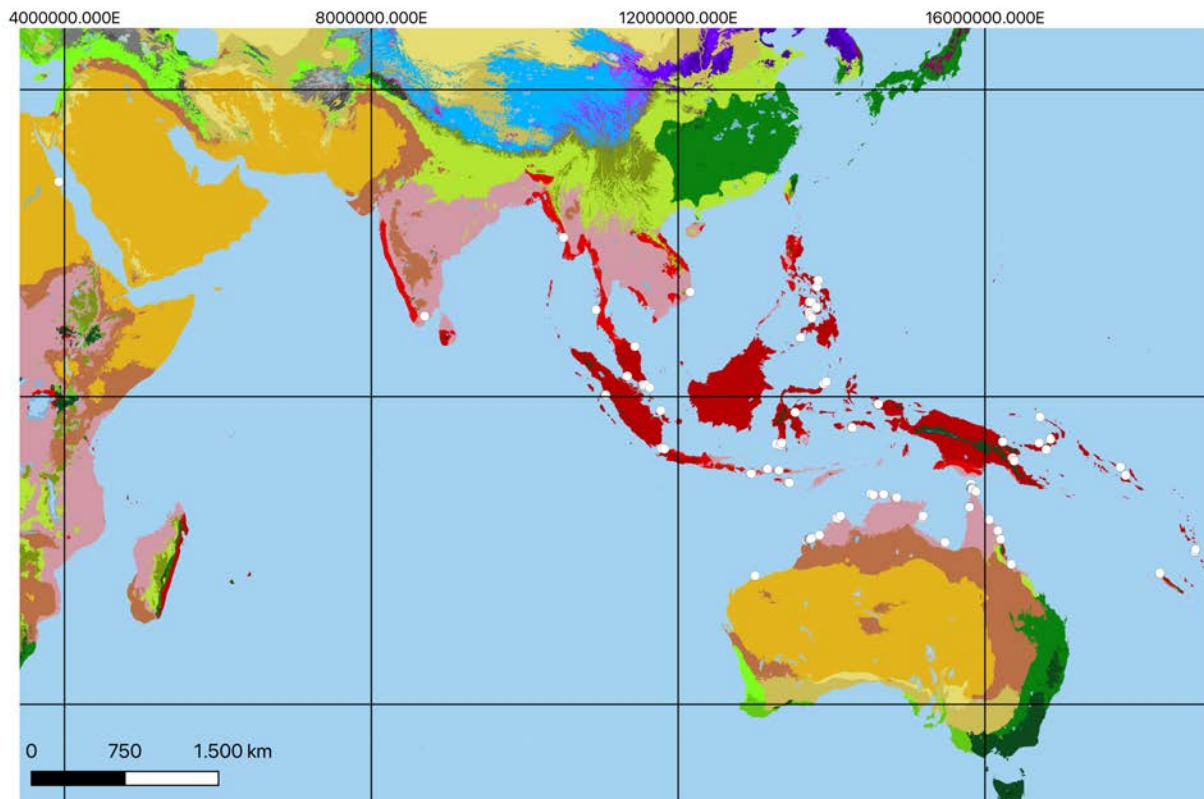

### Köppen profile of *Enhalus acoroides*

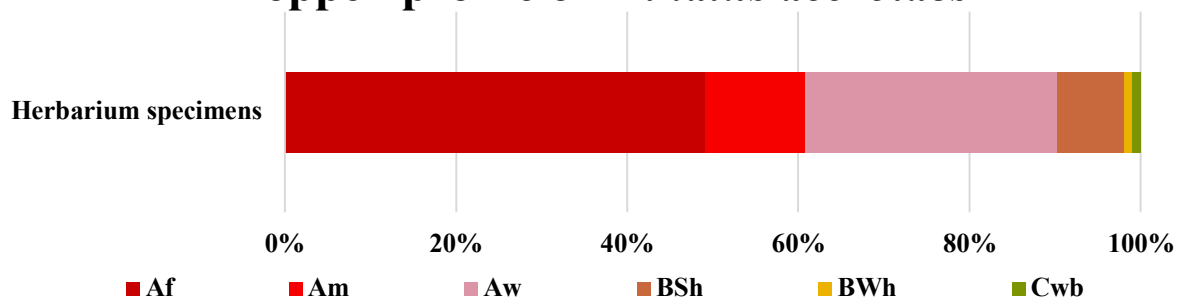

### Köppen profile of *Enhalus acoroides*

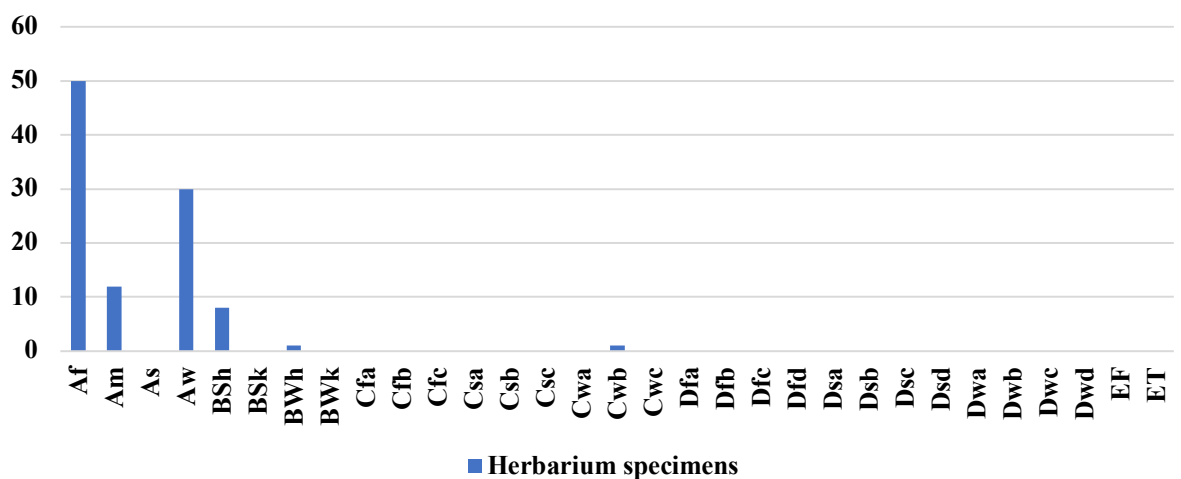

### 5.3.2.1. Genus *Halophila* Thouars 1806.

**Distribution and Köppen profiles of genus *Halophila*** incl. *H. australis*, *H. baillonis*, *H. beccarii*, *H. capricorni*, *H. decipiens*, *H. engelmannii*, *H. gaudichaudii*, *H. hawaiiiana*, *H. major*, *H. minor*, *H. nipponica*, *H. ovalis*, *H. spinulosa*, *H. stipulacea*, *H. sulawesii*, and *H. tricosata* (n = 1767).

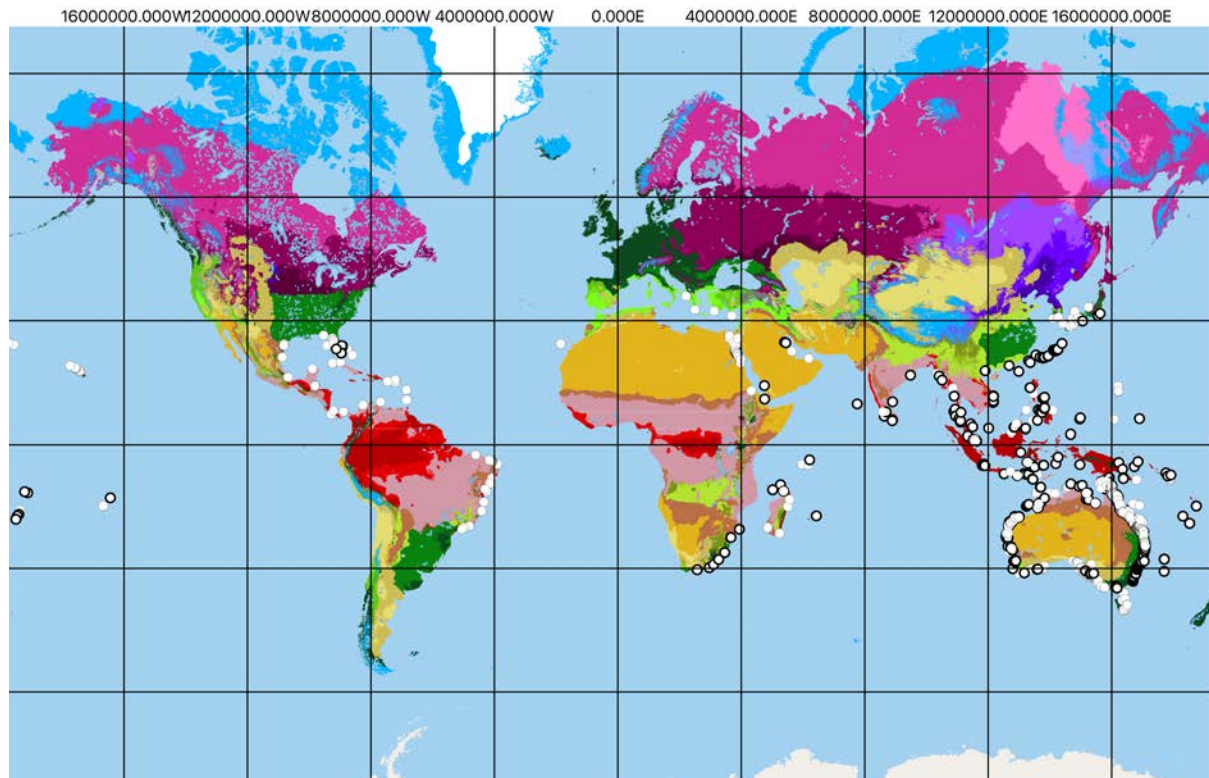

### Köppen profiles of *Hydrocharis* species

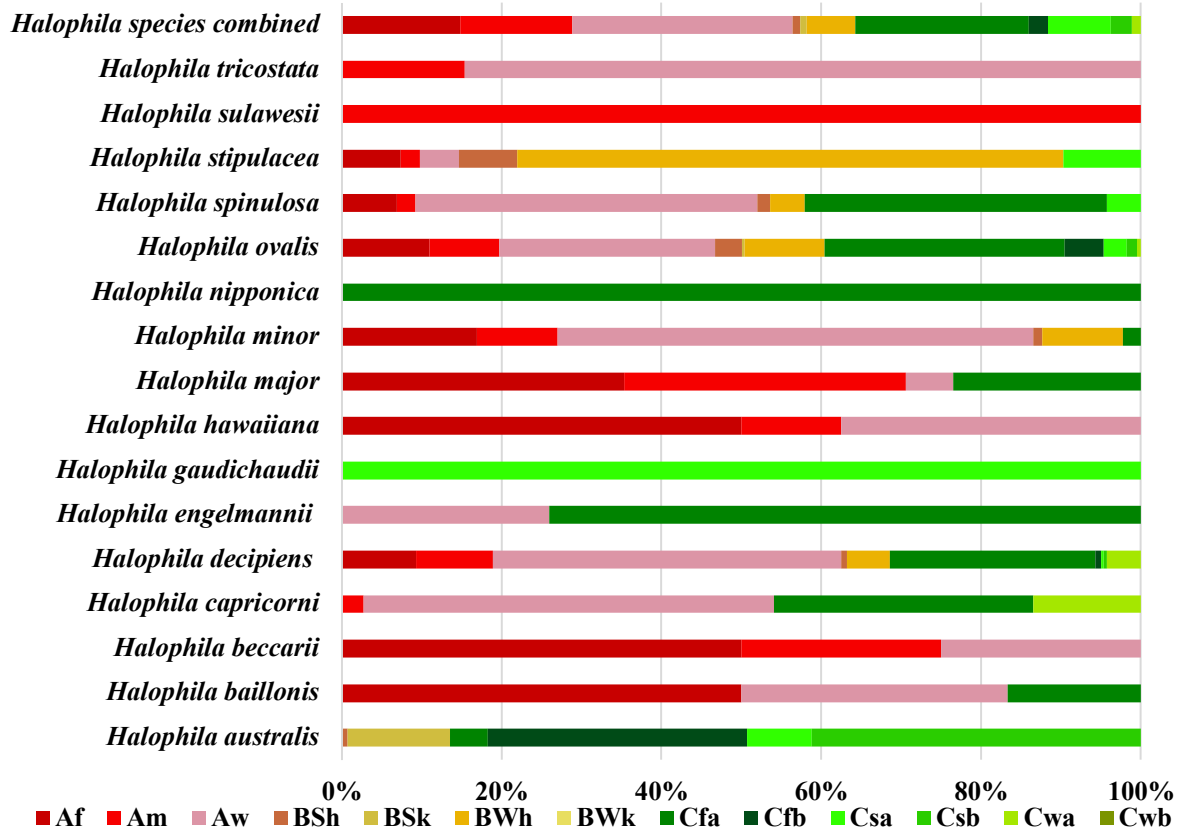

**5.3.2.1.1. Köppen profile, distribution and climate map** – GBIF occurrences of *Halophila australis* Doty & B.C.Stone 1967; herbarium specimens excluding duplicate occurrences (n = 148).

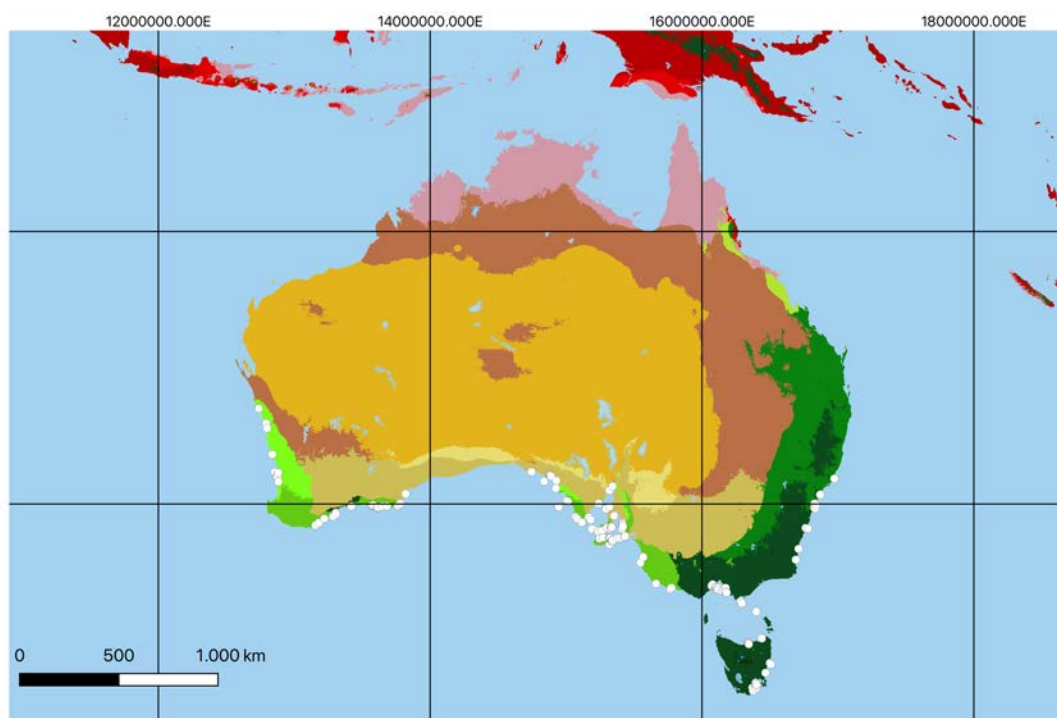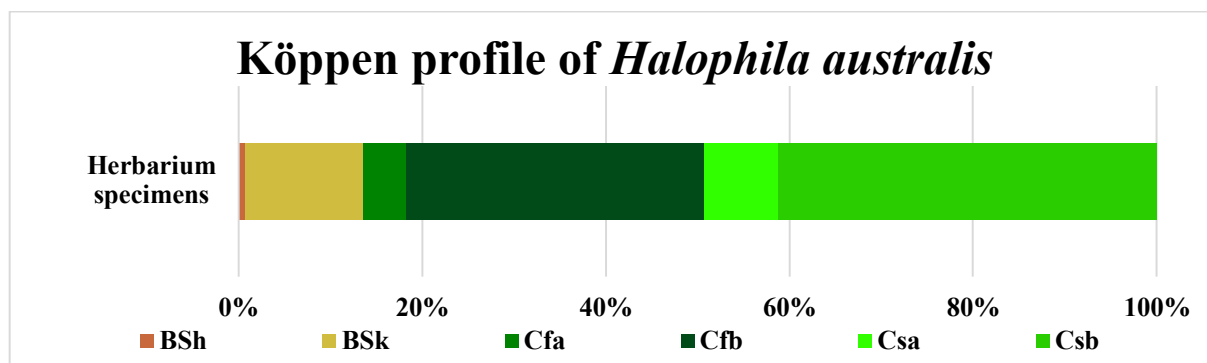

Köppen profile of *Halophila australis*

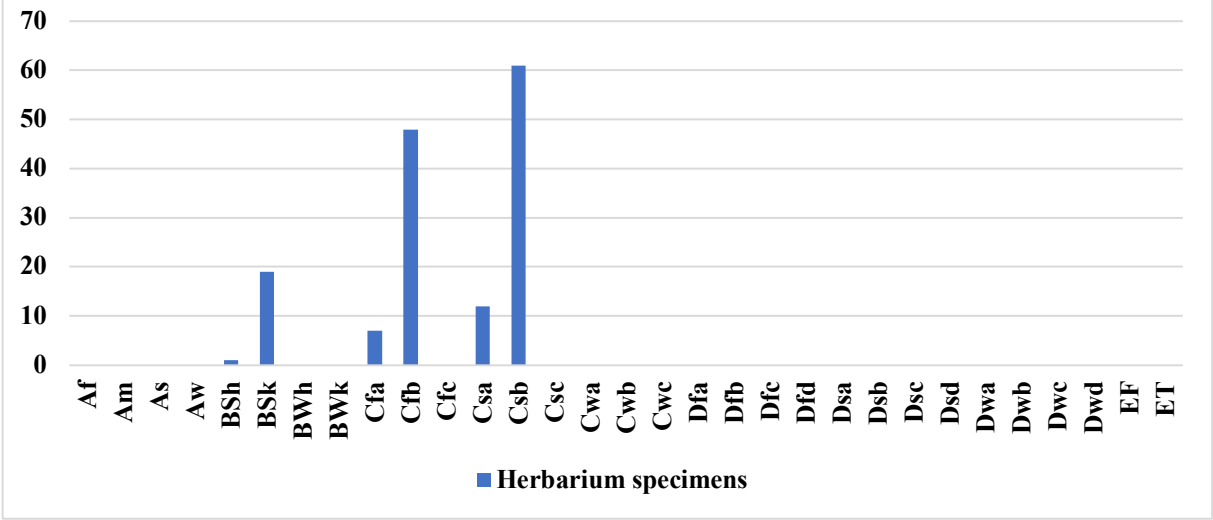

**5.3.2.1.2. Köppen profile, distribution and climate map** – GBIF occurrences of *Halophila baillonis* Asch. ex Dickie 1874; herbarium specimens excluding duplicate occurrences (n = 6).

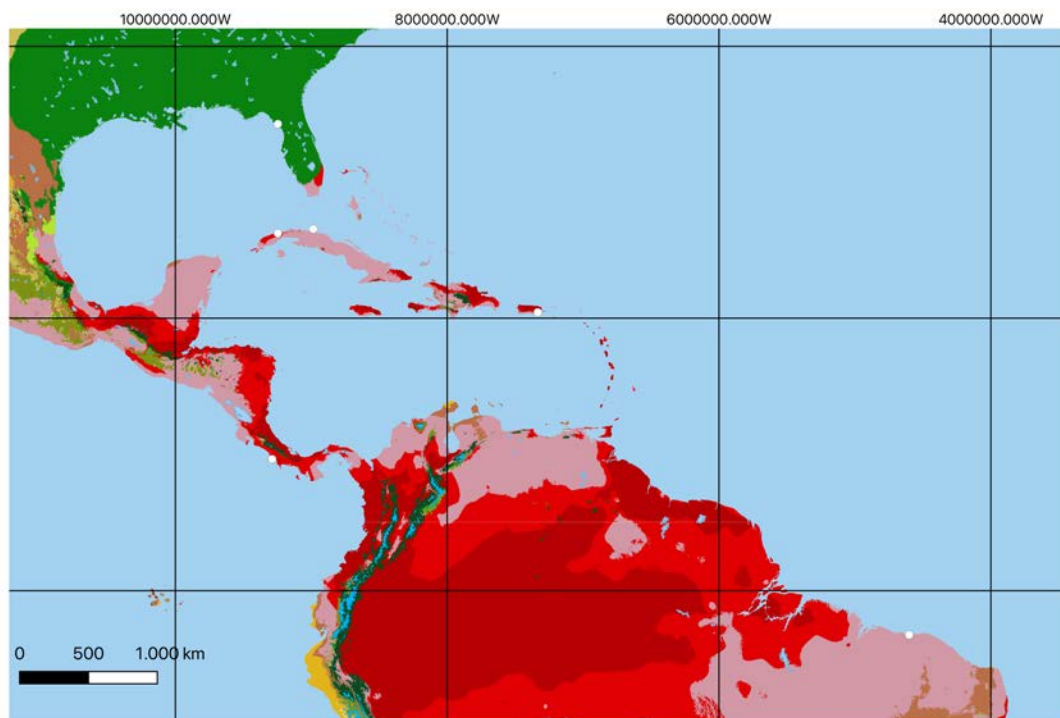

**Köppen profile of *Halophila baillonis***

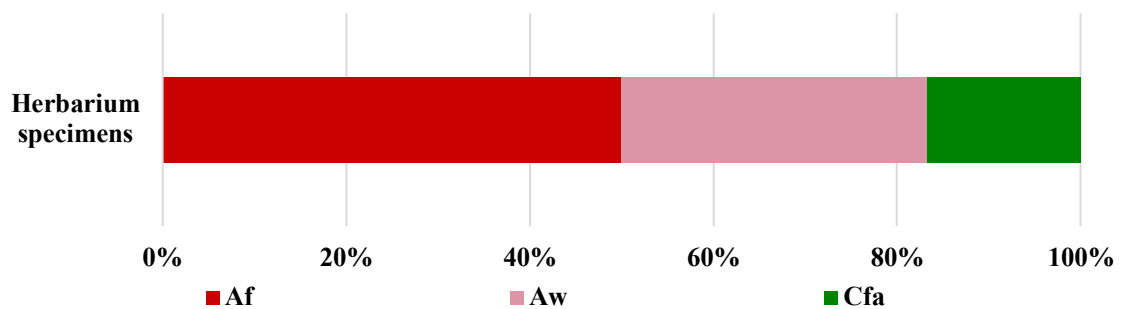

**Köppen profile of *Halophila baillonis***

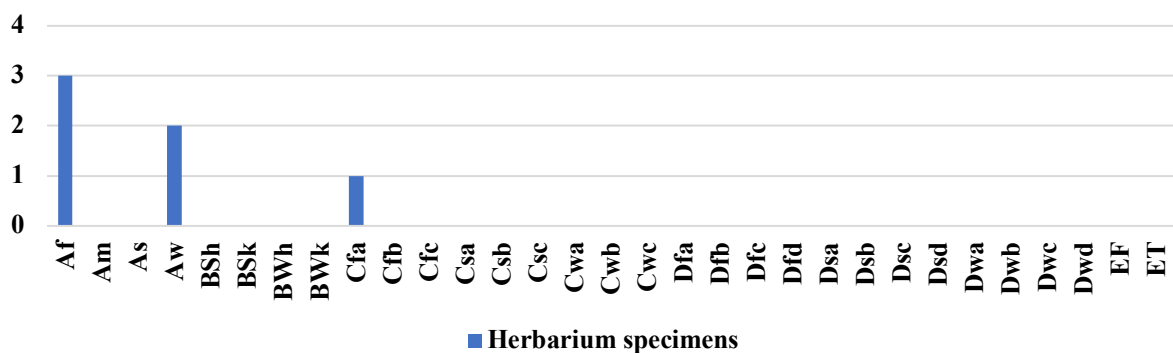

**5.3.2.1.3. Köppen profile, distribution and climate map** – GBIF occurrences of *Halophila beccarii* Asch. 1874; herbarium specimens excluding duplicate occurrences (n = 8).

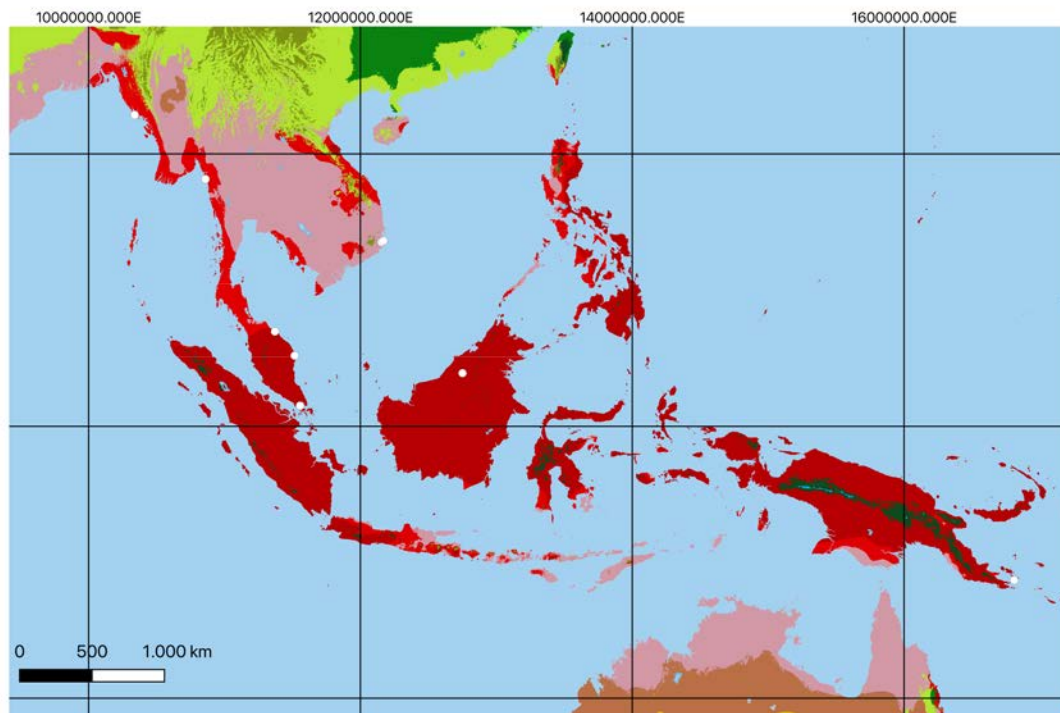

### Köppen profile of *Halophila beccarii*

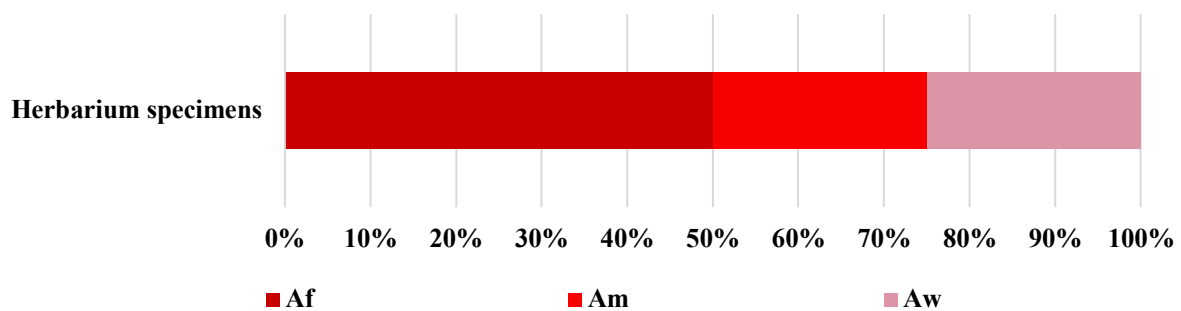

### Köppen profile of *Halophila beccarii*

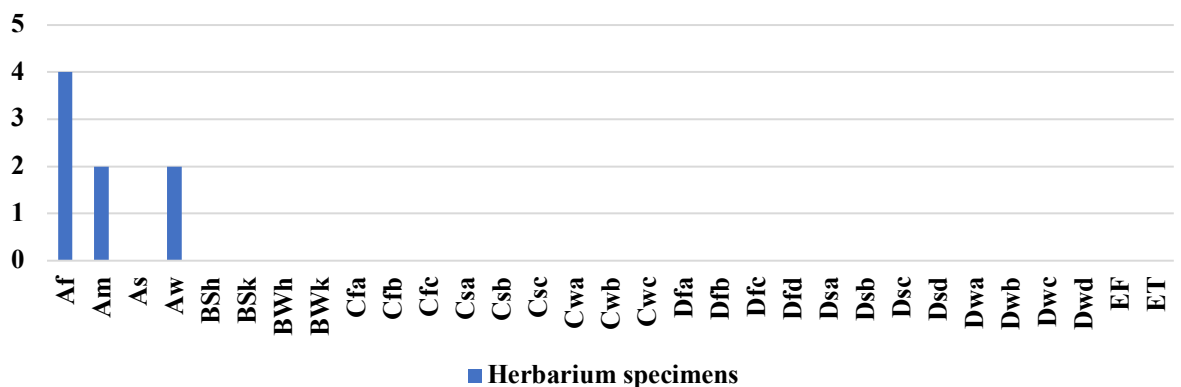

**5.3.2.1.4. Köppen profile, distribution and climate map** – GBIF occurrences of *Halophila capricorni* Larkum 1995; herbarium specimens excluding duplicate occurrences (n = 37).

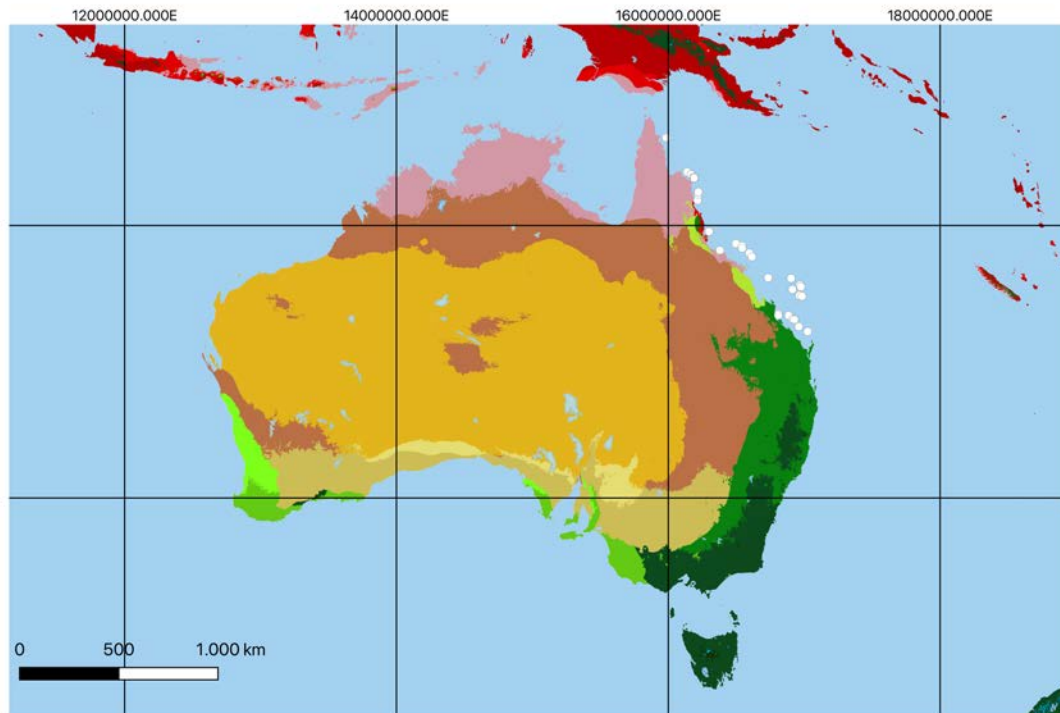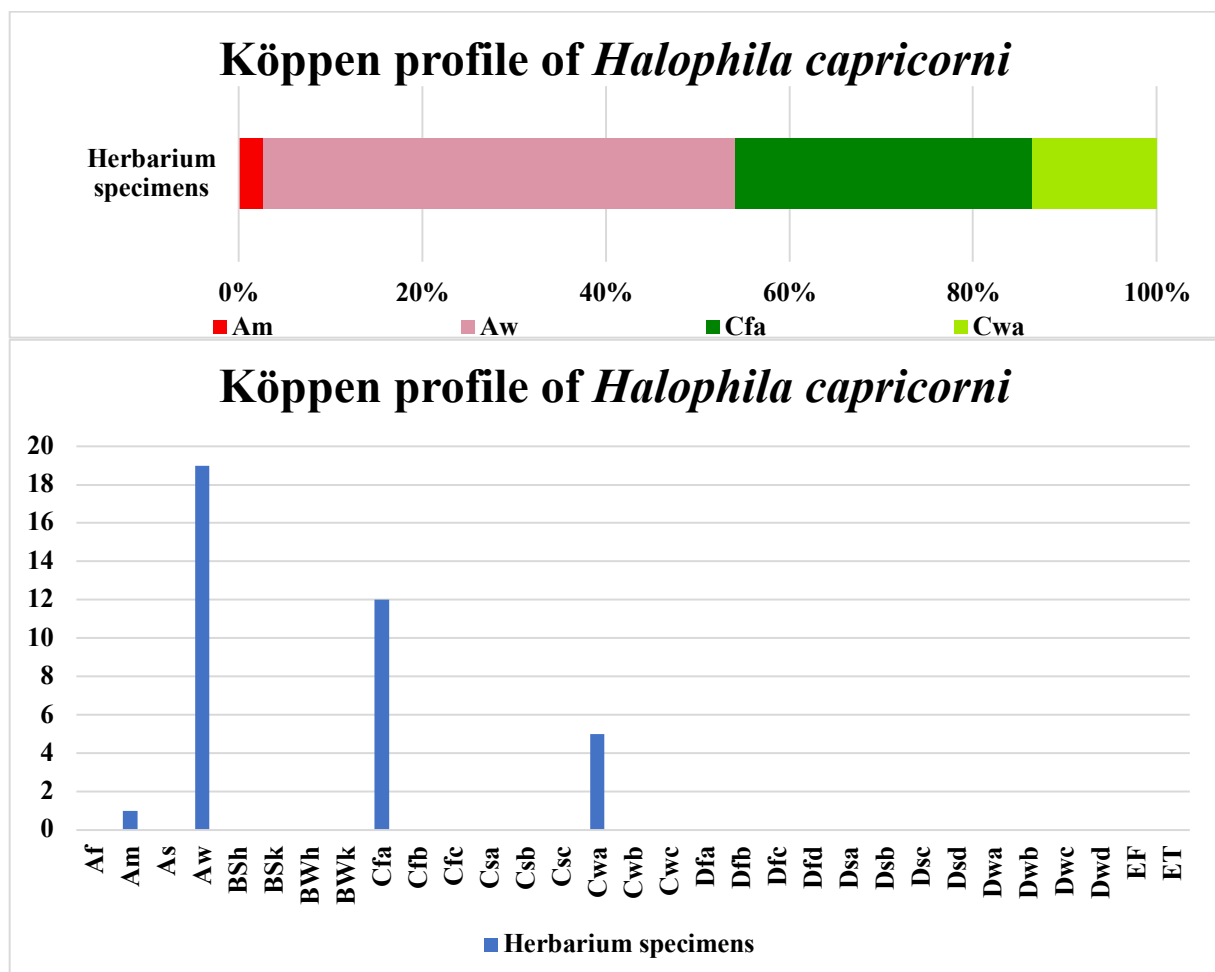

**5.3.2.1.5. Köppen profile, distribution and climate map** – GBIF occurrences of *Halophila decipiens* Ostenf. 1902; herbarium specimens excluding duplicate occurrences (n = 280).

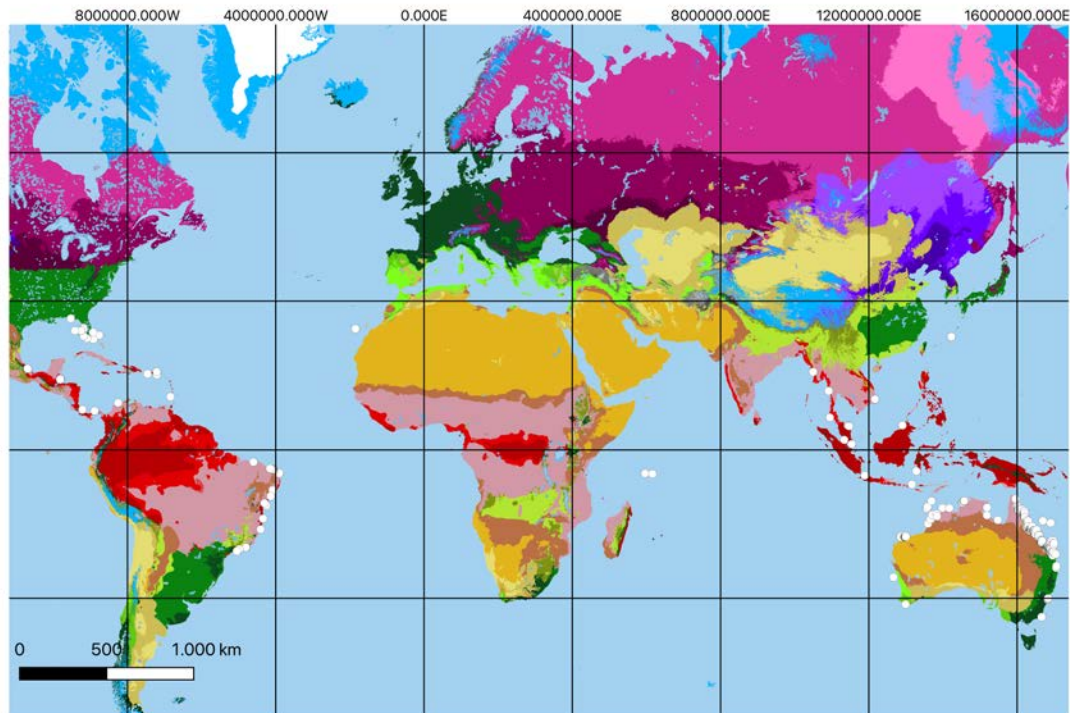

**Köppen profile of *Halophila decipiens***

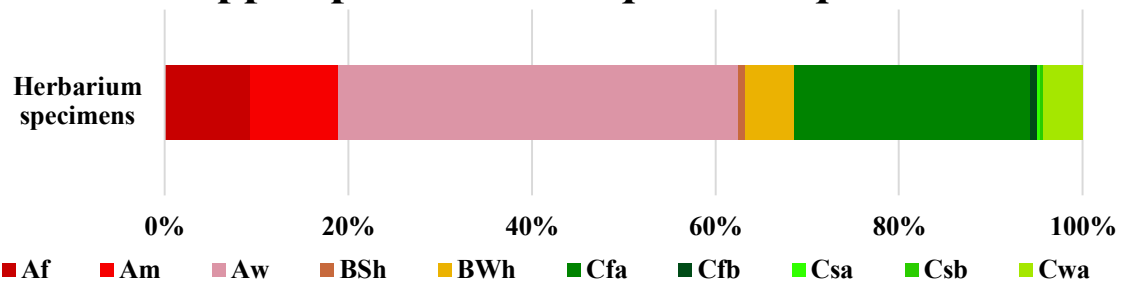

**Köppen profile of *Halophila decipiens***

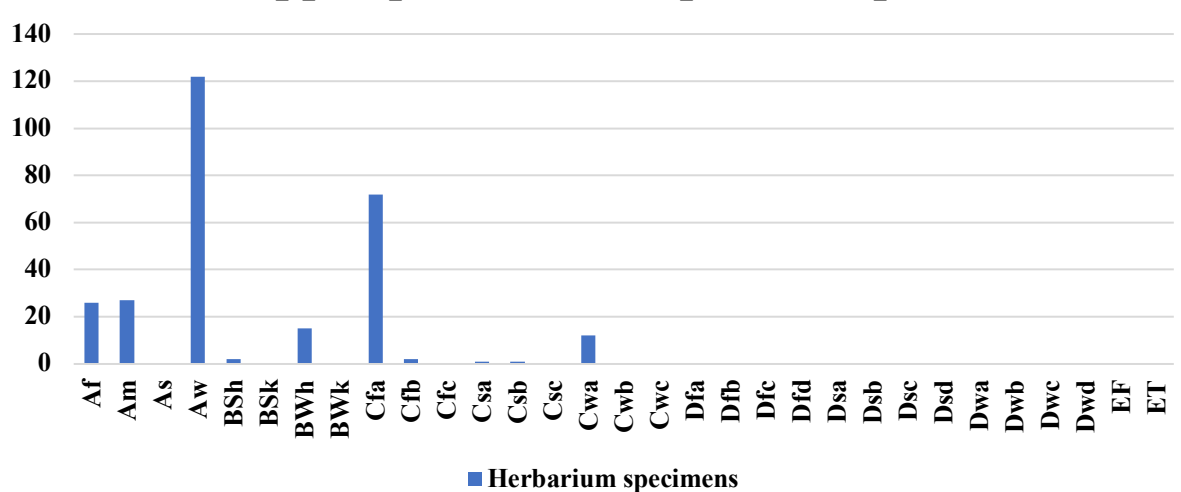

**5.3.2.1.6. Köppen profile, distribution and climate map** – GBIF occurrences of *Halophila engelmannii* Asch. 1974; herbarium specimens excluding duplicate occurrences (n = 27).

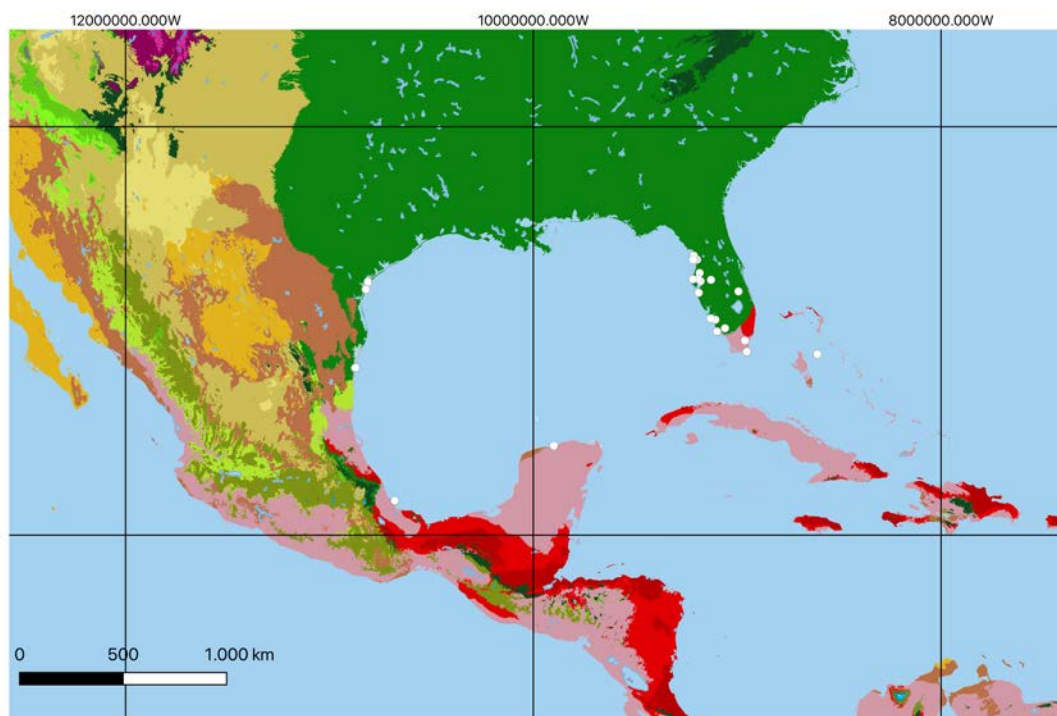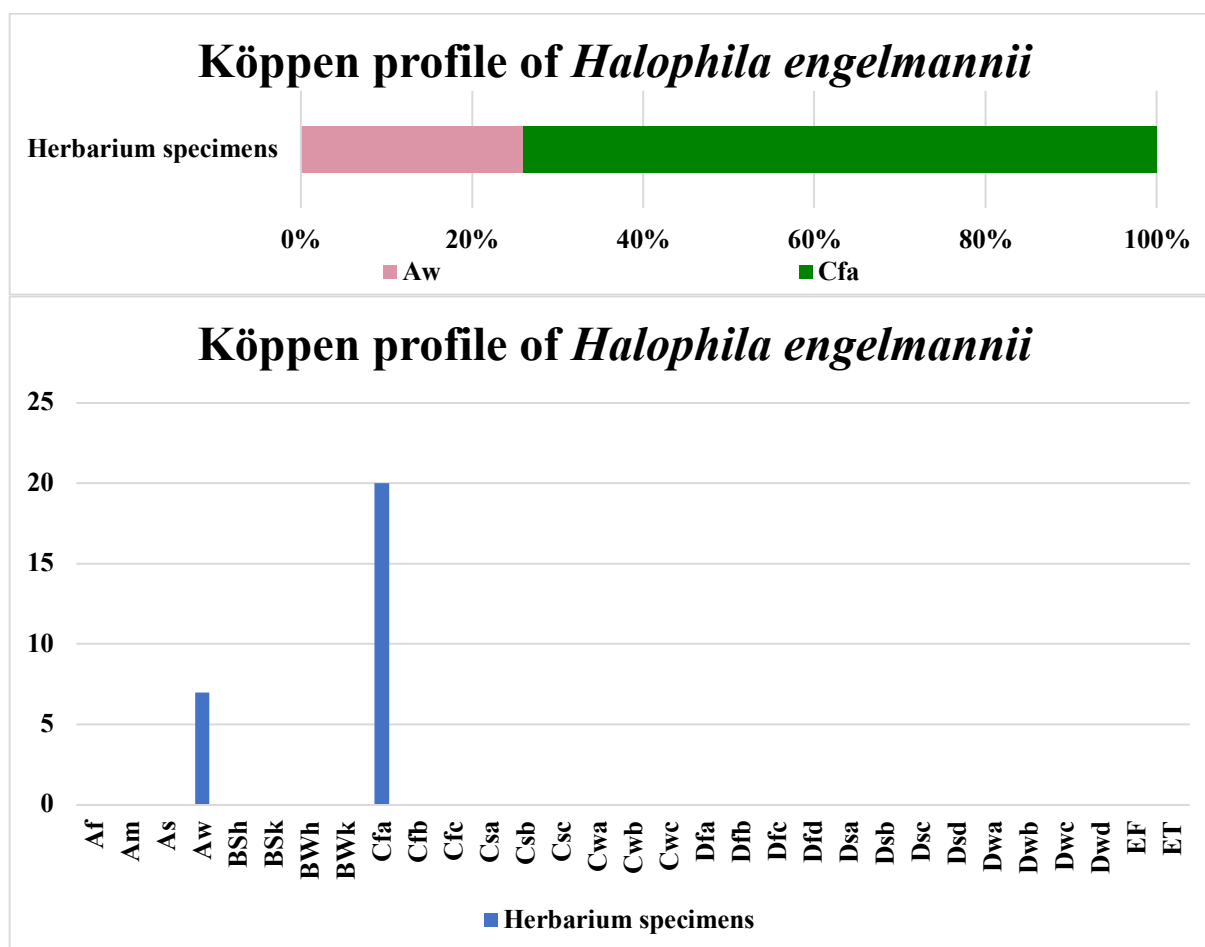

**5.3.2.1.7. Köppen profile, distribution and climate map** – GBIF occurrences of *Halophila gaudichaudii* J.Kuo 2006; herbarium specimens excluding duplicate occurrences (n = 4).

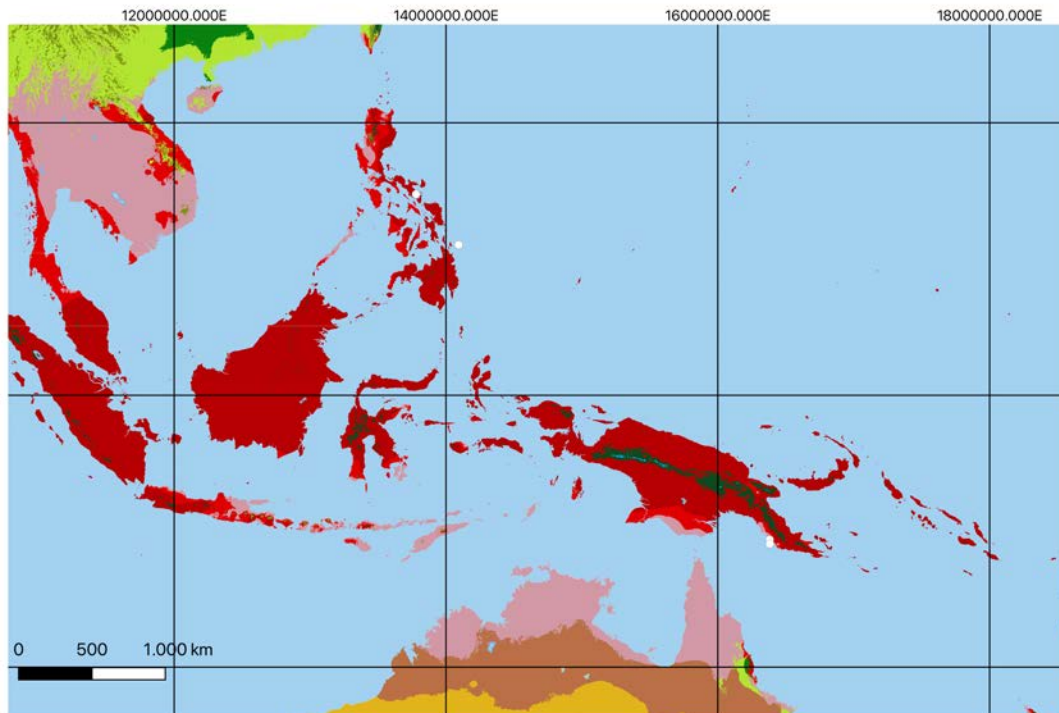

**Köppen profile of *Halophila gaudichaudii***

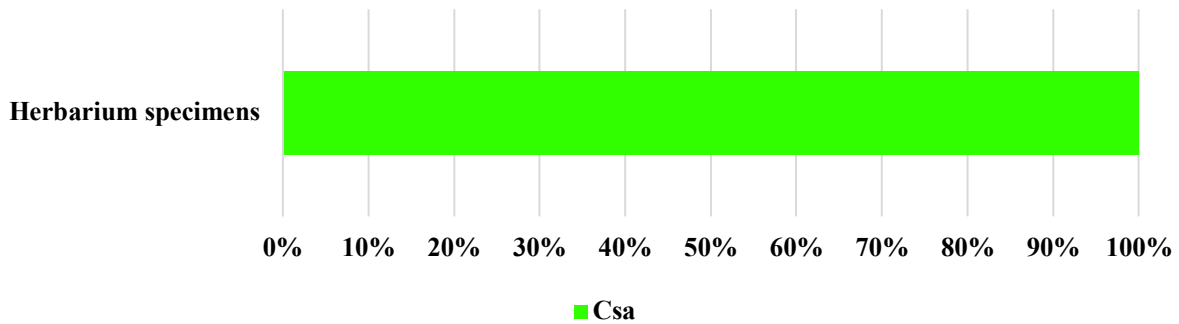

**Köppen profile of *Halophila gaudichaudii***

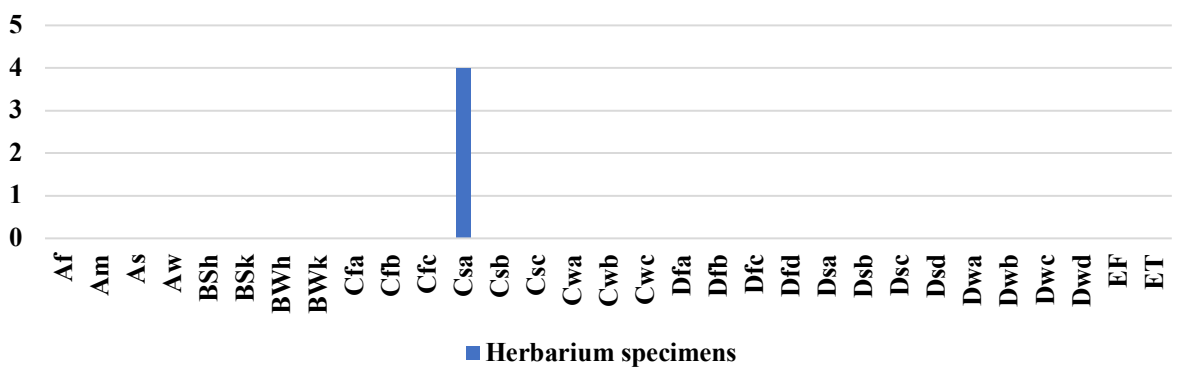

**5.3.2.1.8. Köppen profile, distribution and climate map** – GBIF occurrences of *Halophila hawaiiiana* Kuo 2006; herbarium specimens excluding duplicate occurrences (n = 8).

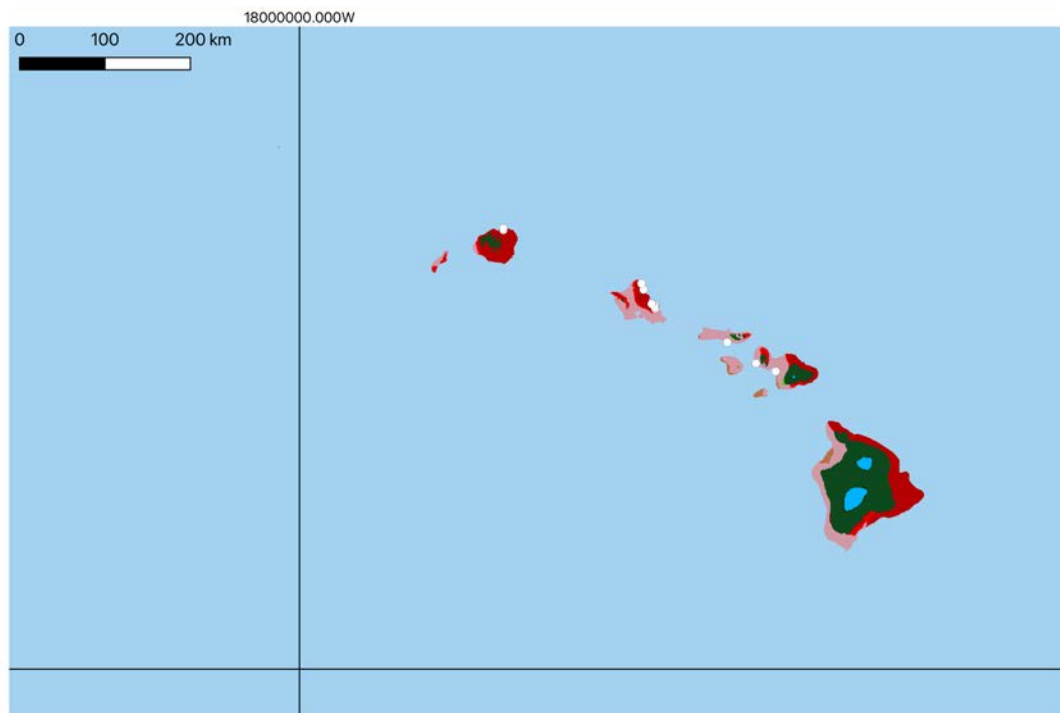

**Köppen profile of *Halophila hawaiiiana***

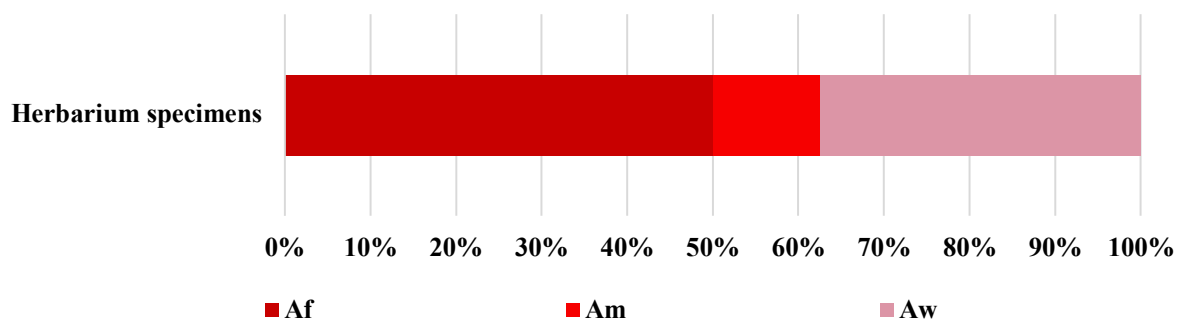

**Köppen profile of *Halophila hawaiiiana***

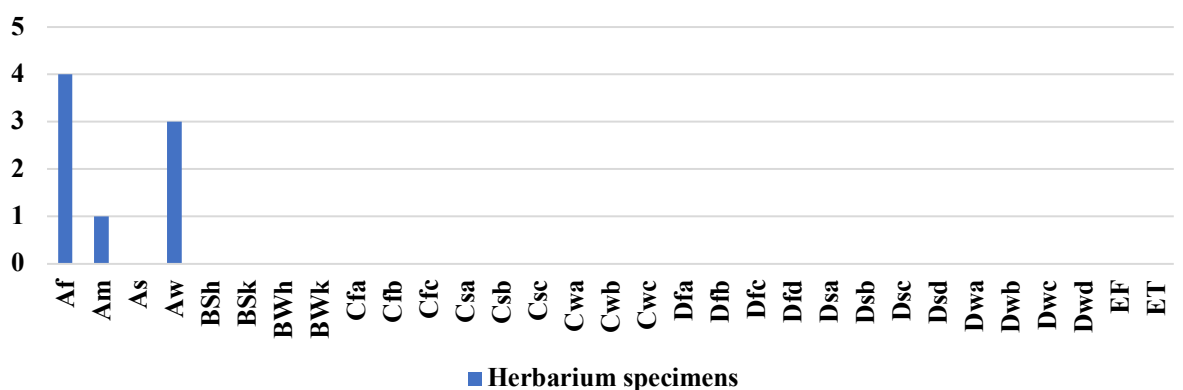

**5.3.2.1.9. Köppen profile, distribution and climate map** – GBIF occurrences of *Halophila major* Mirq. 1856; herbarium specimens excluding duplicate occurrences (n = 17).

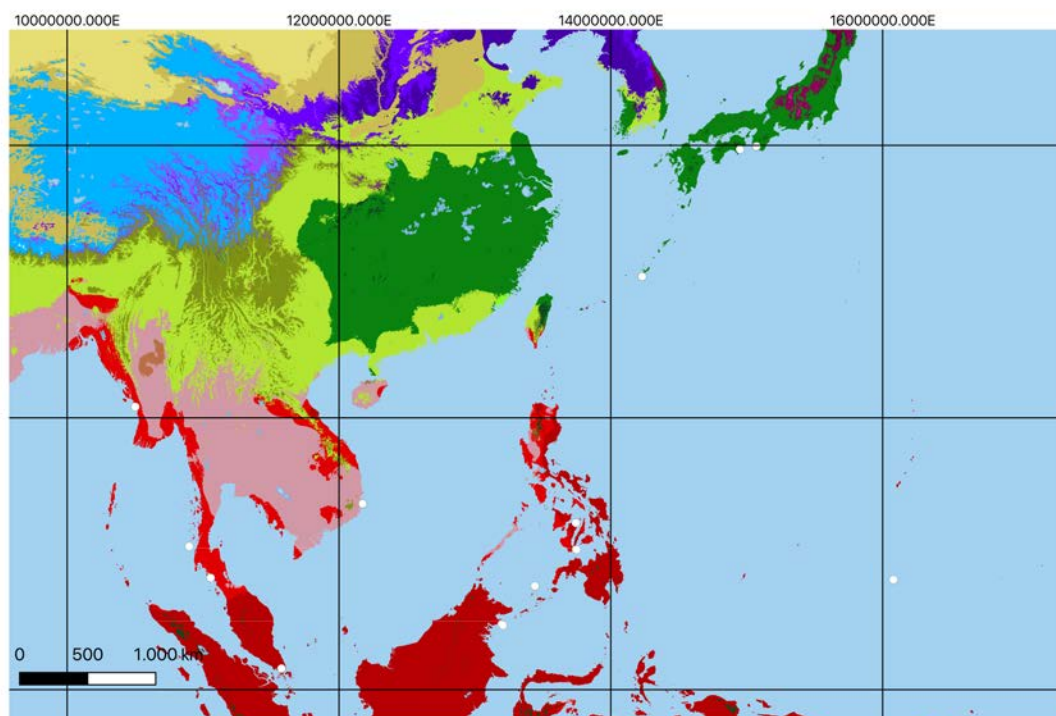

### Köppen profile of *Halophila major*

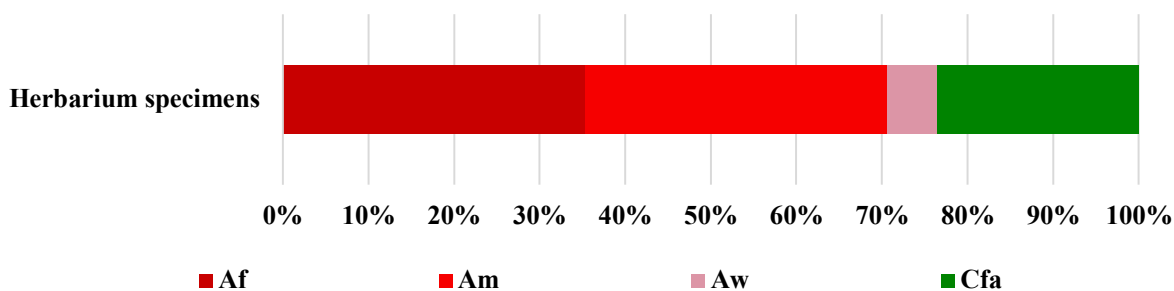

### Köppen profile of *Halophila major*

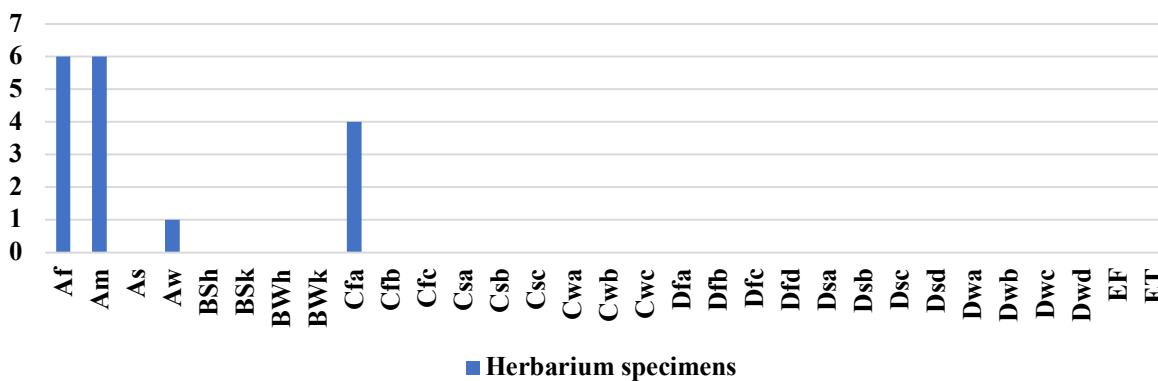

**5.3.2.1.10. Köppen profile, distribution and climate map – GBIF occurrences of *Halophila minor* (Zoll.) Hartog 1957; herbarium specimens excluding duplicate occurrences (n = 89).**

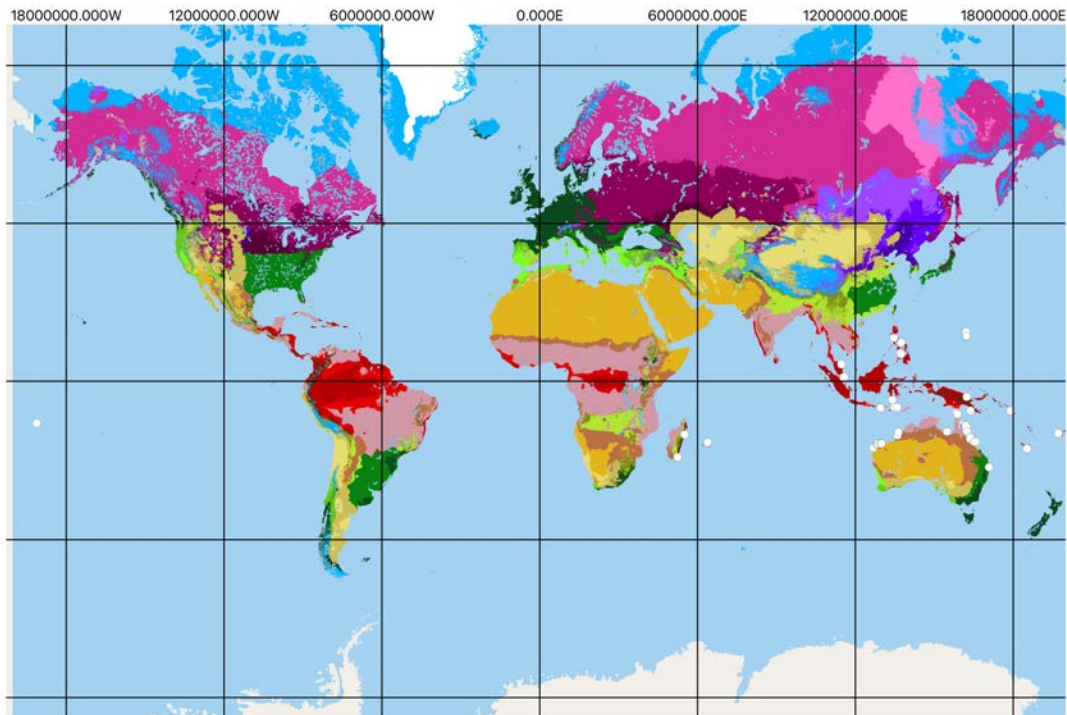

**Köppen profile of *Halophila minor***

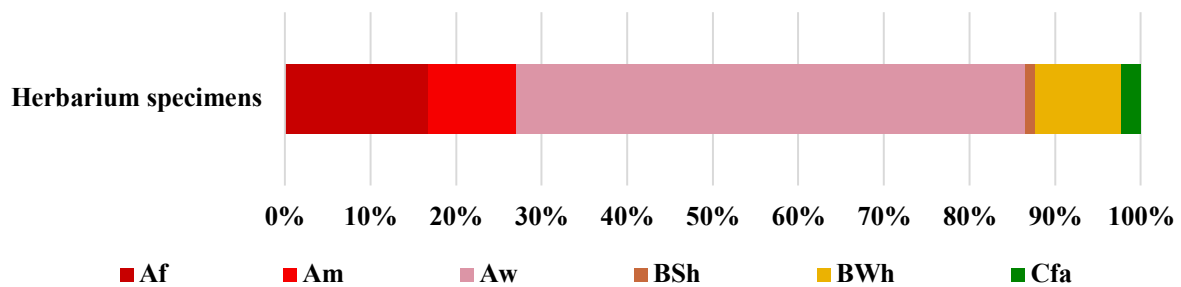

**Köppen profile of *Halophila minor***

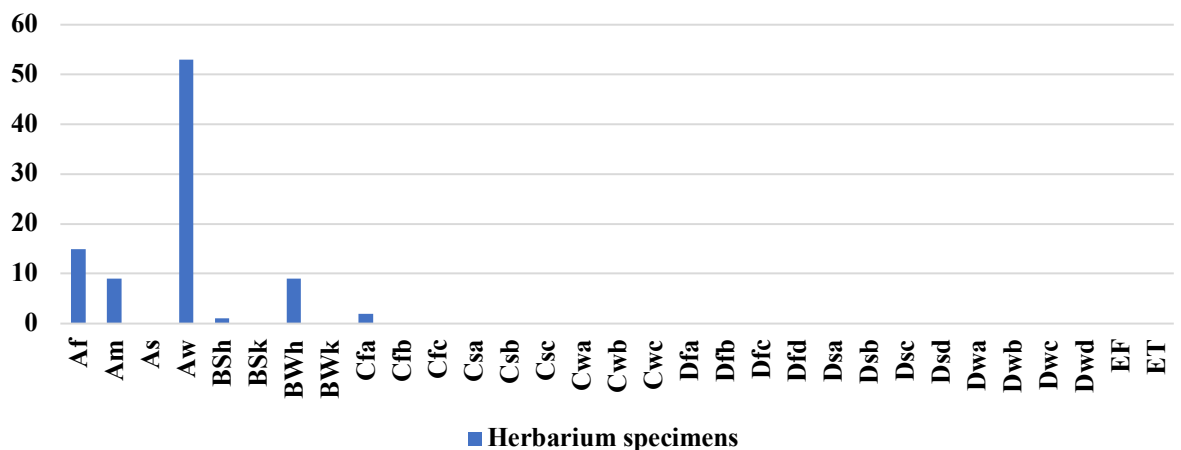

**5.3.2.1.11. Köppen profile, distribution and climate map** – GBIF occurrences of *Halophila nipponica* J.Kuo 2006; herbarium specimens excluding duplicate occurrences (n = 16).

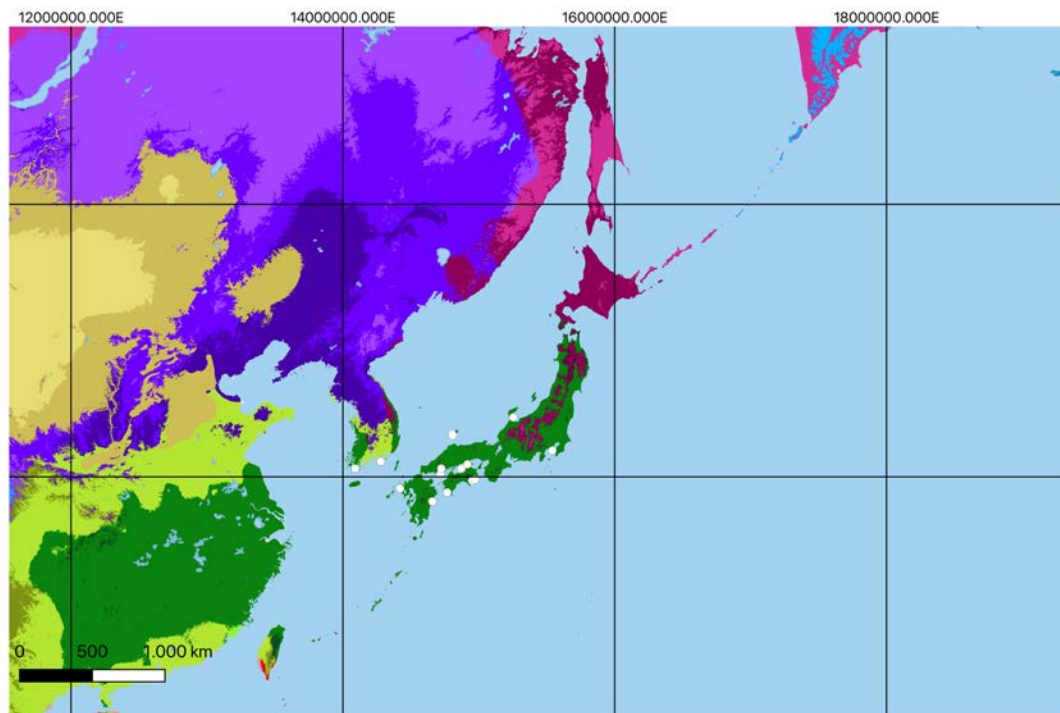

### Köppen profile of *Halophila nipponica*

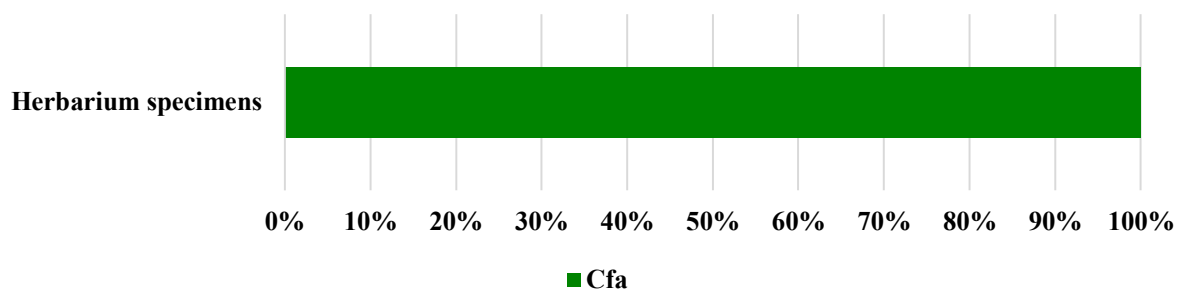

### Köppen profile of *Halophila nipponica*

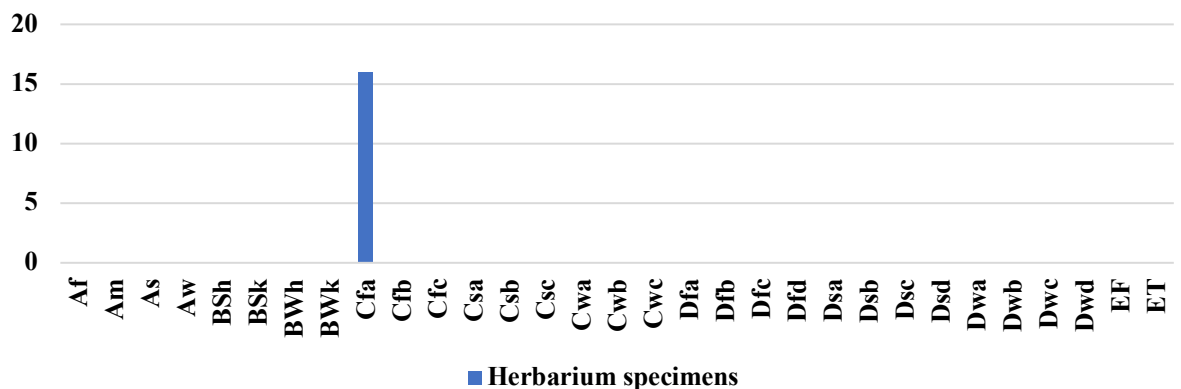

**5.3.2.1.11. Köppen profile, distribution and climate map** – GBIF occurrences of *Halophila ovalis* (R.Br. 1810) Hook.f. 1859; herbarium specimens excluding duplicate occurrences (n = 619).

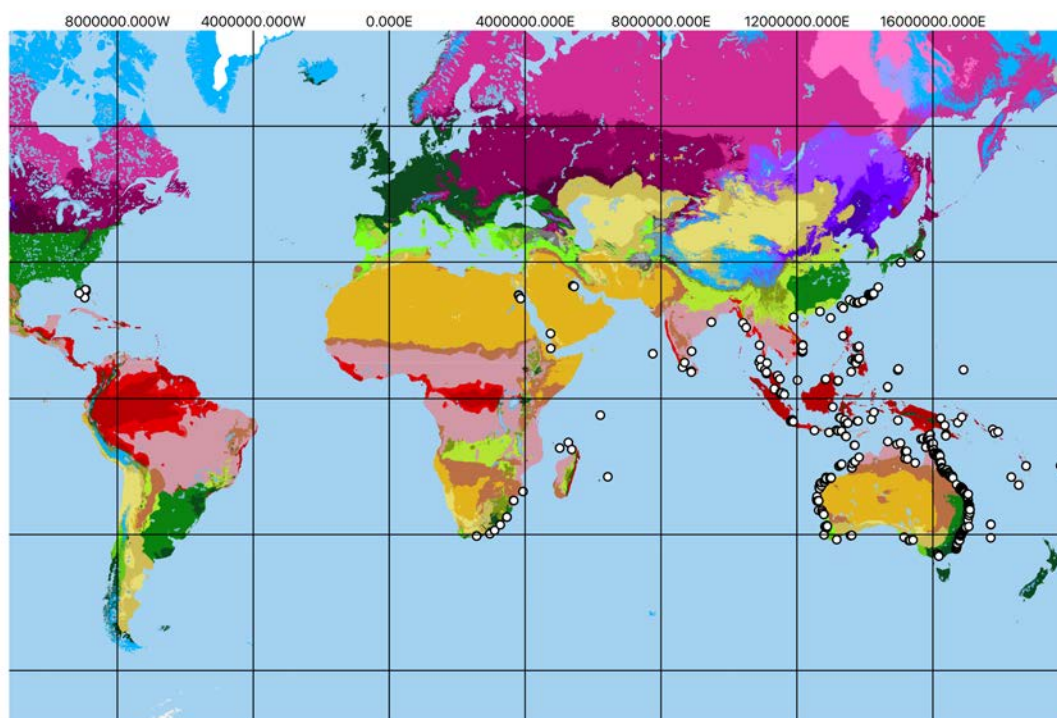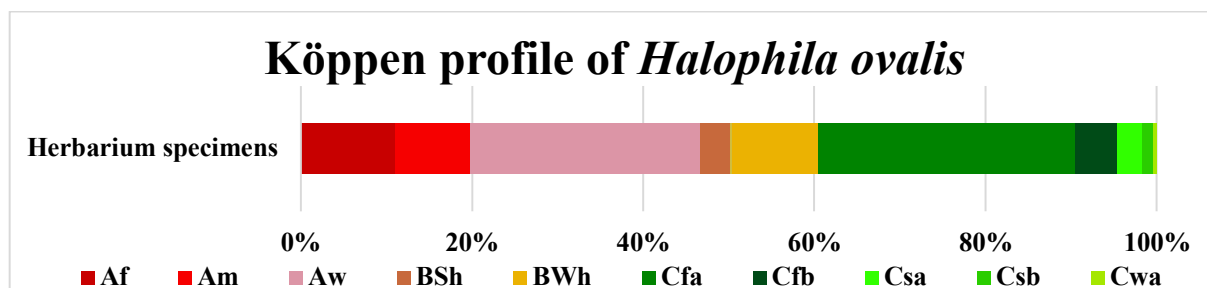

## Köppen profile of *Halophila ovalis*

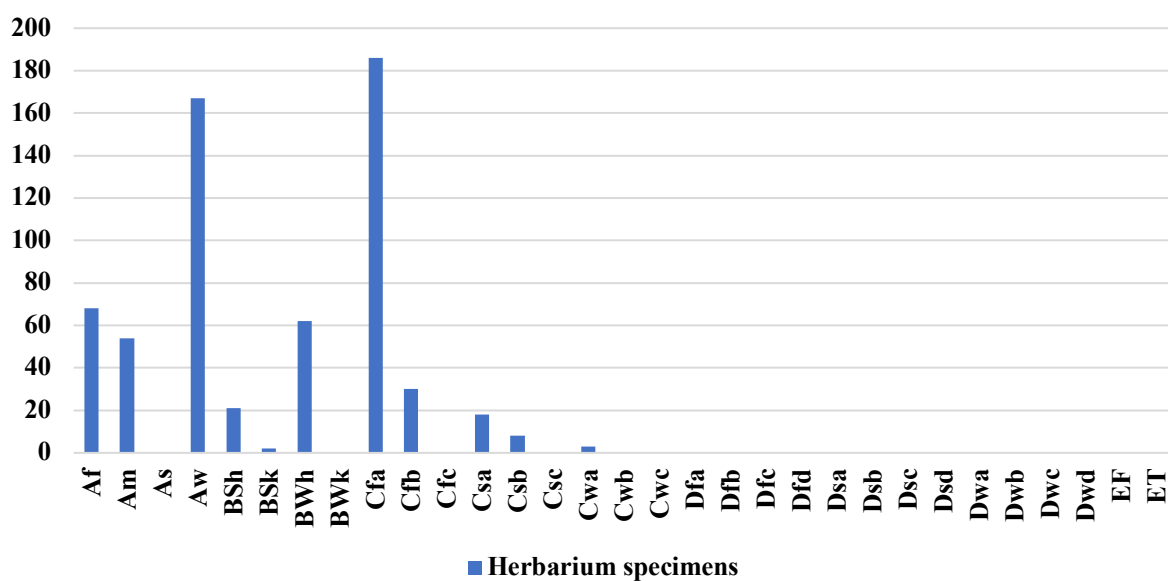

**5.3.2.1.12. Köppen profile, distribution and climate map – GBIF occurrences of *Halophila spinulosa* (R.Br. 1810) Asch. 1875; herbarium specimens excluding duplicate occurrences (n = 304).**

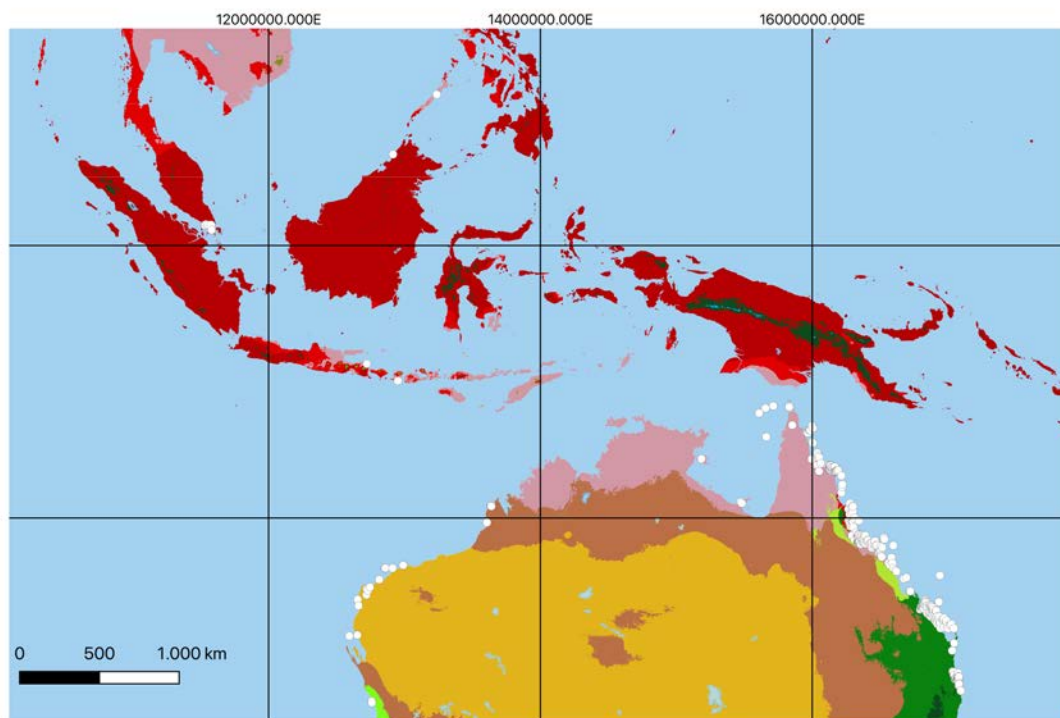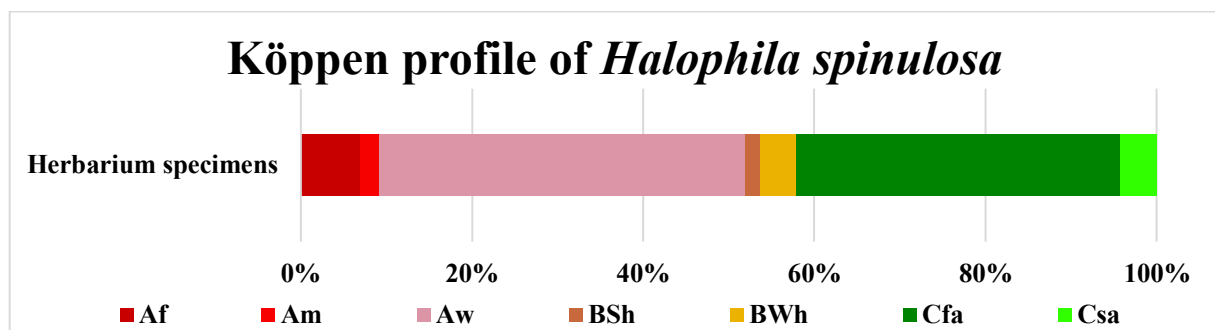

## Köppen profile of *Halophila spinulosa*

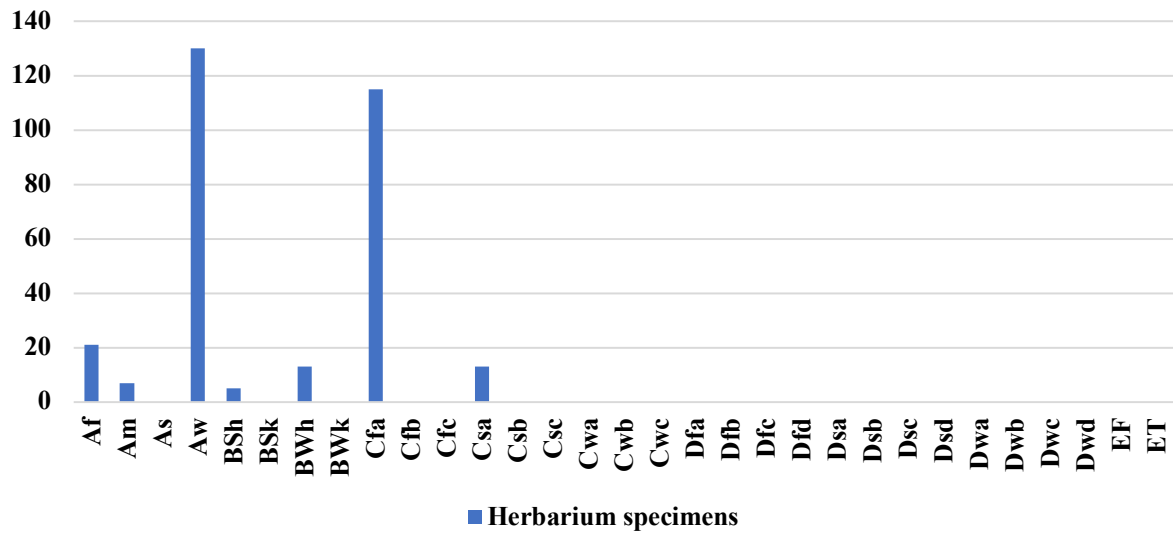

**5.3.2.1.13. Köppen profile, distribution and climate map** – GBIF occurrences of *Halophila stipulacea* (Forssk.) Asch. 1867; herbarium specimens excluding duplicate occurrences (n = 41).

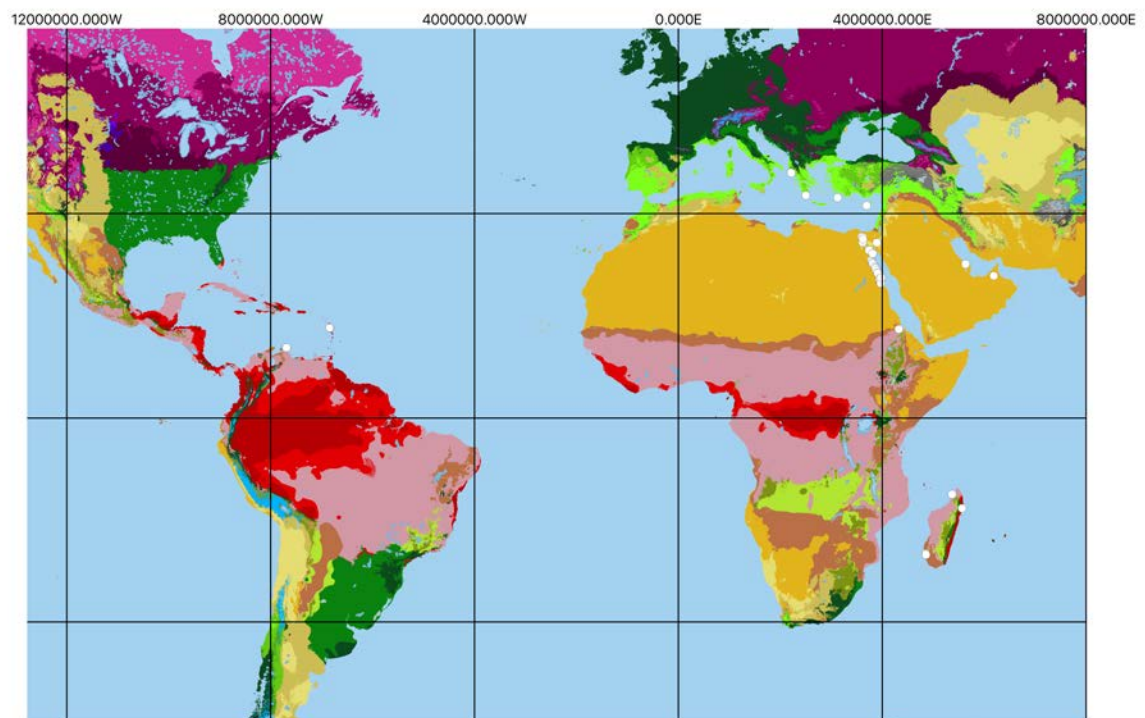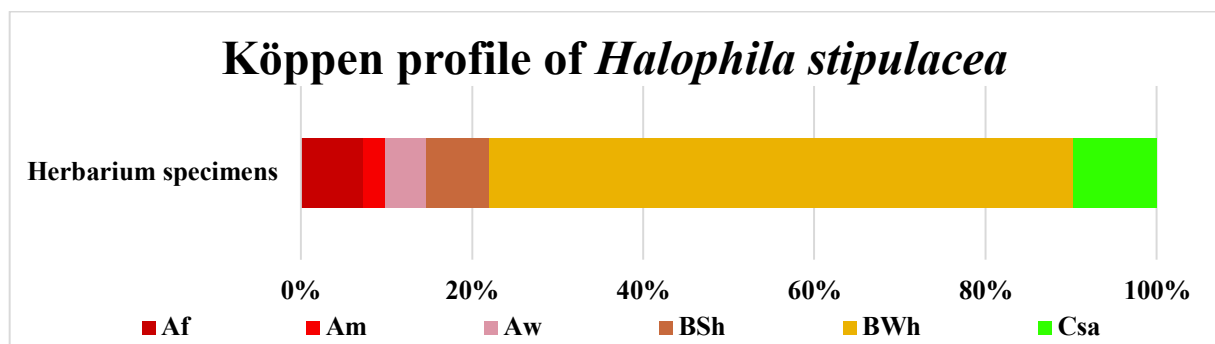

Köppen profile of *Halophila stipulacea*

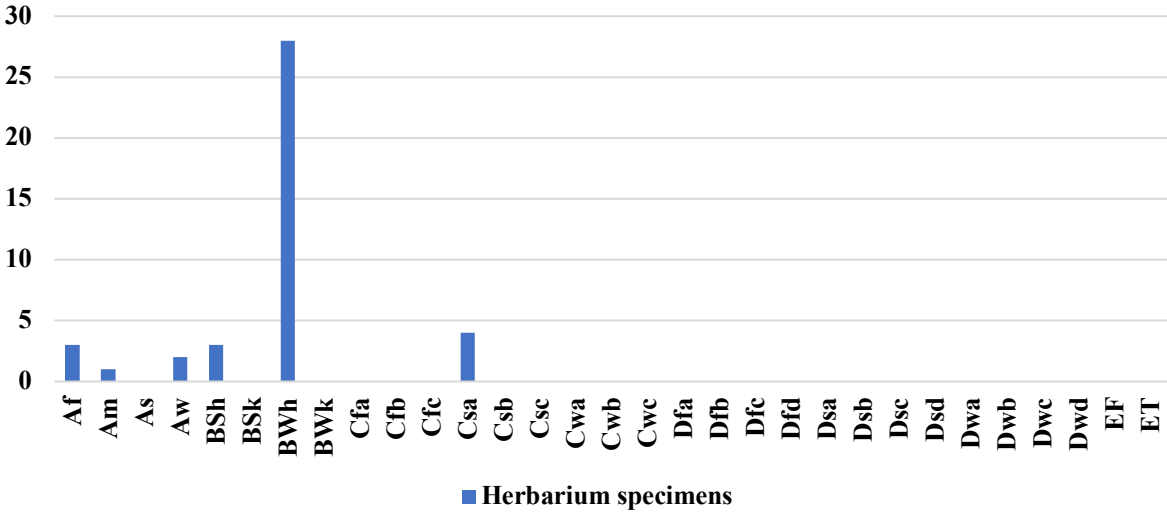

**5.3.2.1.14. Köppen profile, distribution and climate map** – GBIF occurrences of *Halophila sulawesii* J.Kuo 2006; herbarium specimens excluding duplicate occurrences (n = 7).

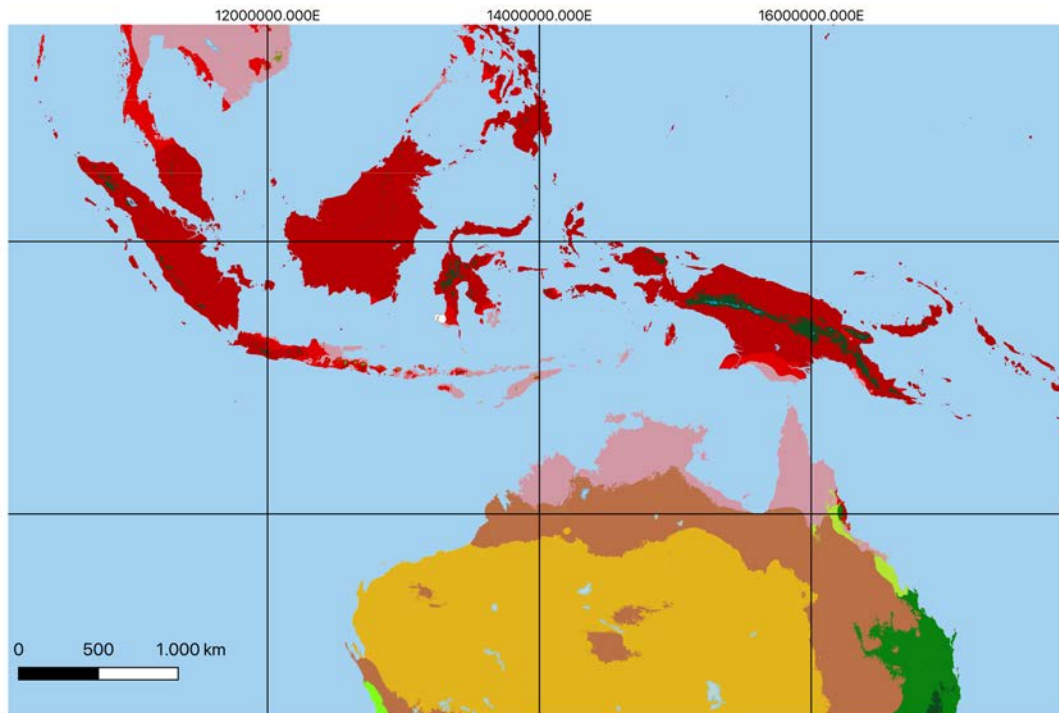

**Köppen profile of *Halophila sulawesii***

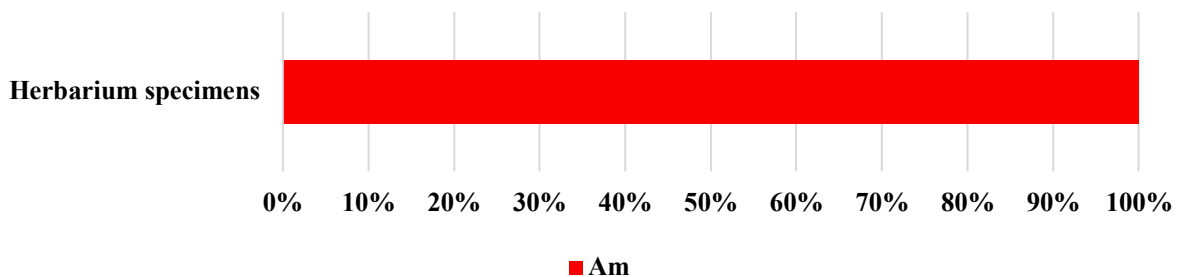

**Köppen profile of *Halophila sulawesii***

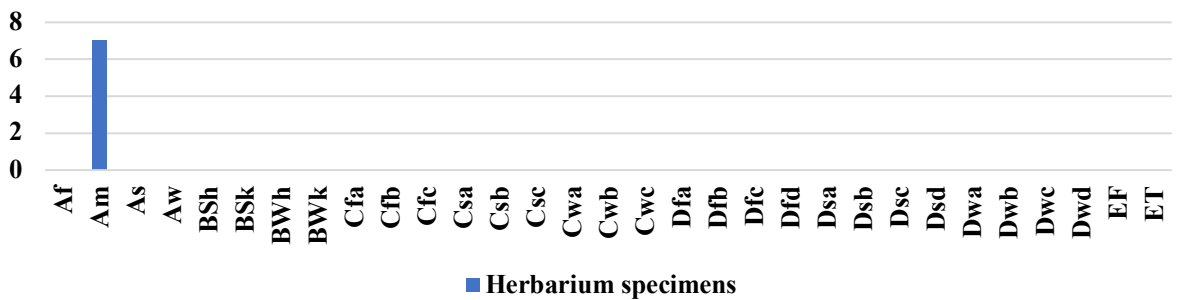

**5.3.2.1.15. Köppen profile, distribution and climate map** – GBIF occurrences of *Halophila tricostata* M.Greenway 1979; herbarium specimens excluding duplicate occurrences (n = 7).

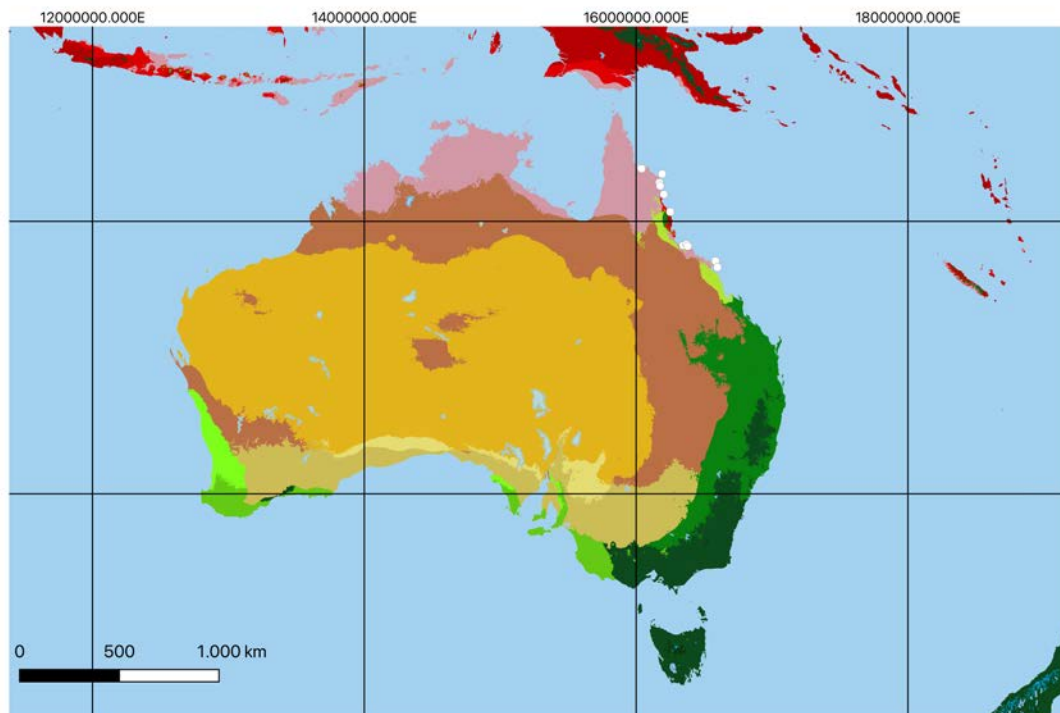

### Köppen profile of *Halophila tricostata*

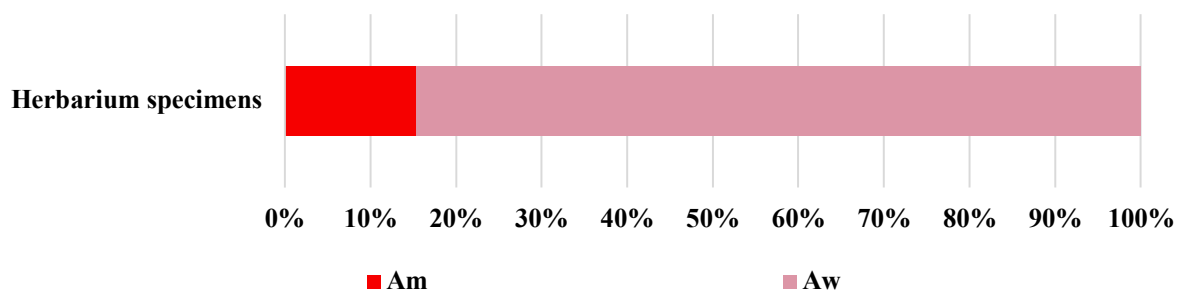

### Köppen profile of *Halophila tricostata*

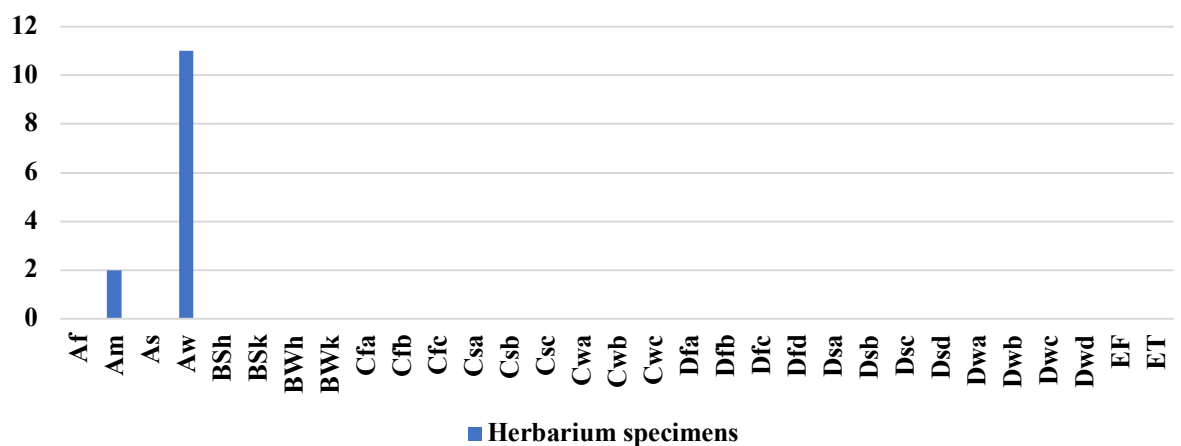

### 5.3.2.2. Genus *Thalassia* Banks & Sol. ex K.D.Koenig 1805.

**Distribution and Köppen profiles of genus *Thalassia* incl. *T. hemprichii* and *T. testudinum*, based on preserved specimen (n = 341).**

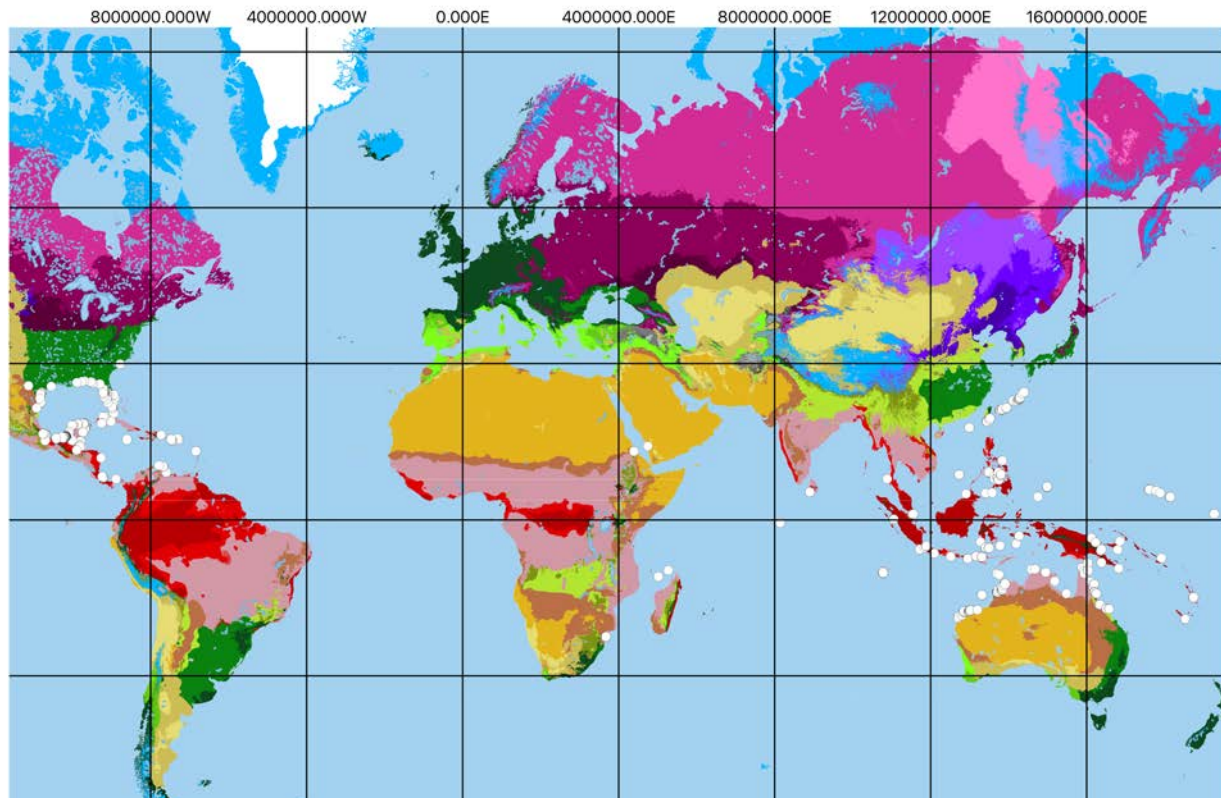

### Köppen profiles of *Thalassia* species

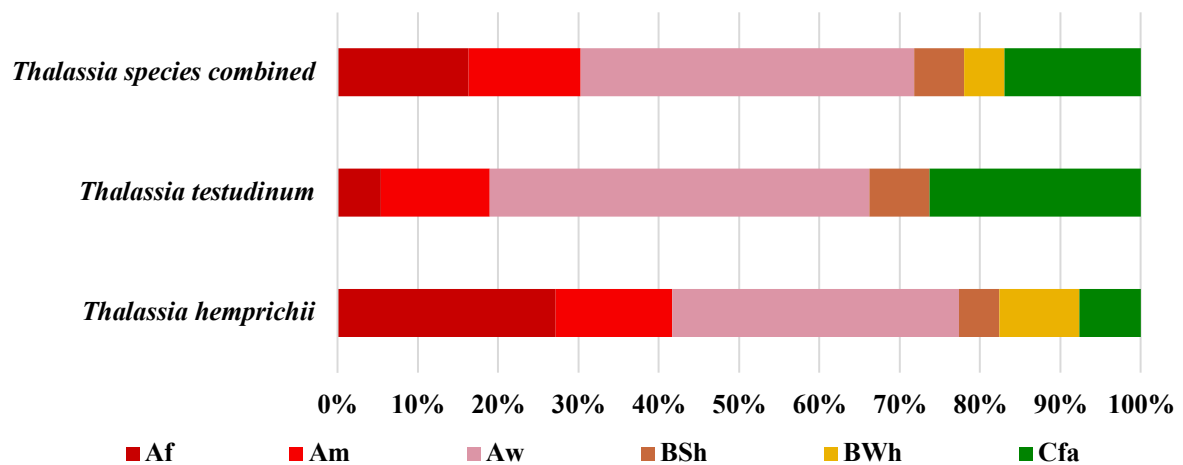

**5.3.2.2.1. Köppen profile, distribution and climate map** – GBIF occurrences of *Thalassia hemprichii* (Ehrenb. 1832) Asch. 1871; herbarium specimens excluding duplicate occurrences (n = 221).

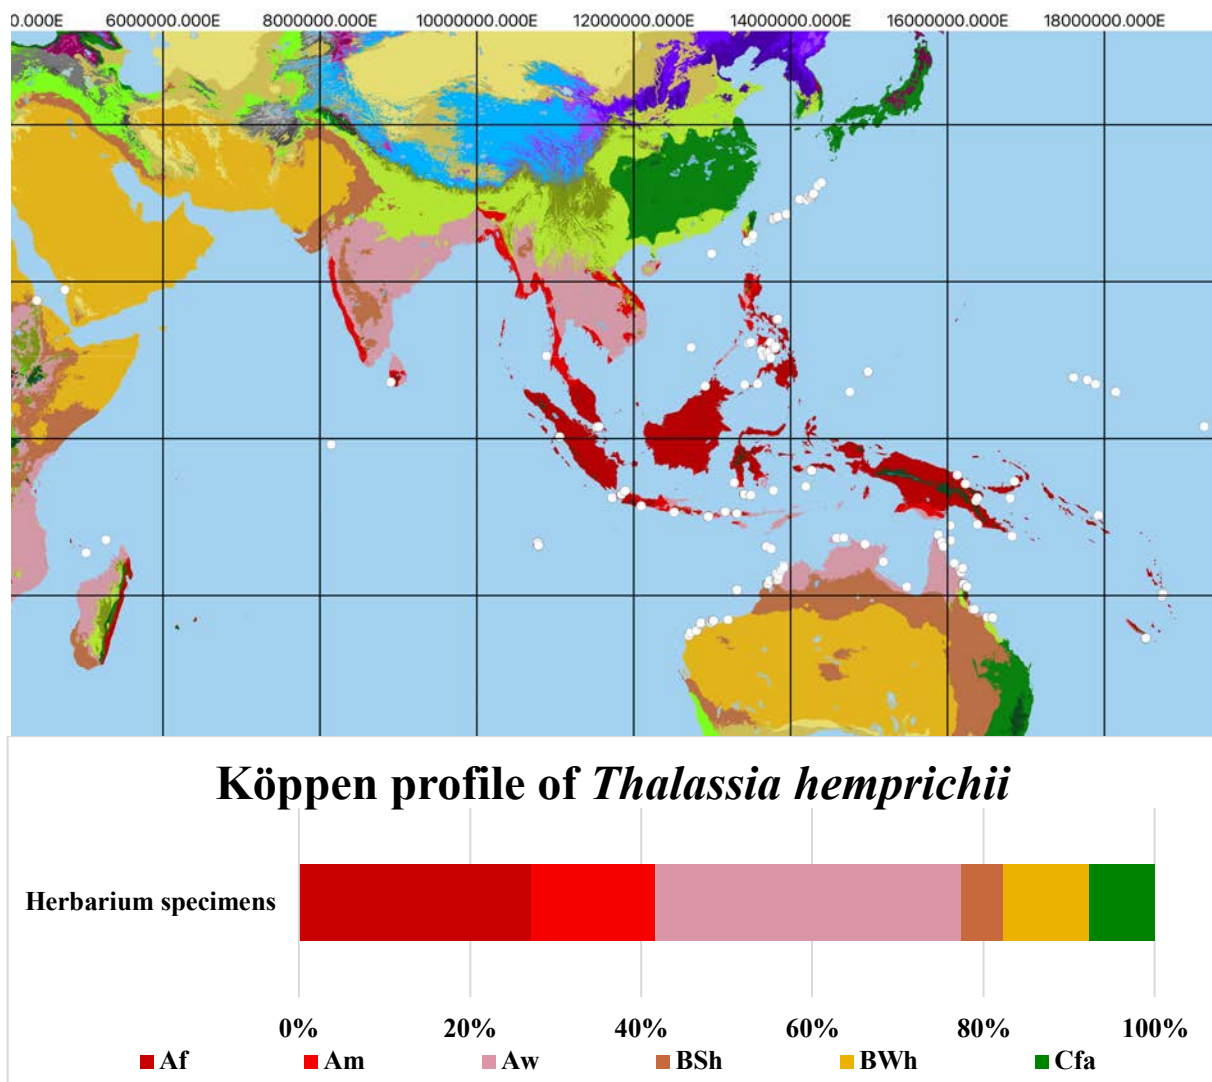

## Köppen profile of *Thalassia hemprichii*

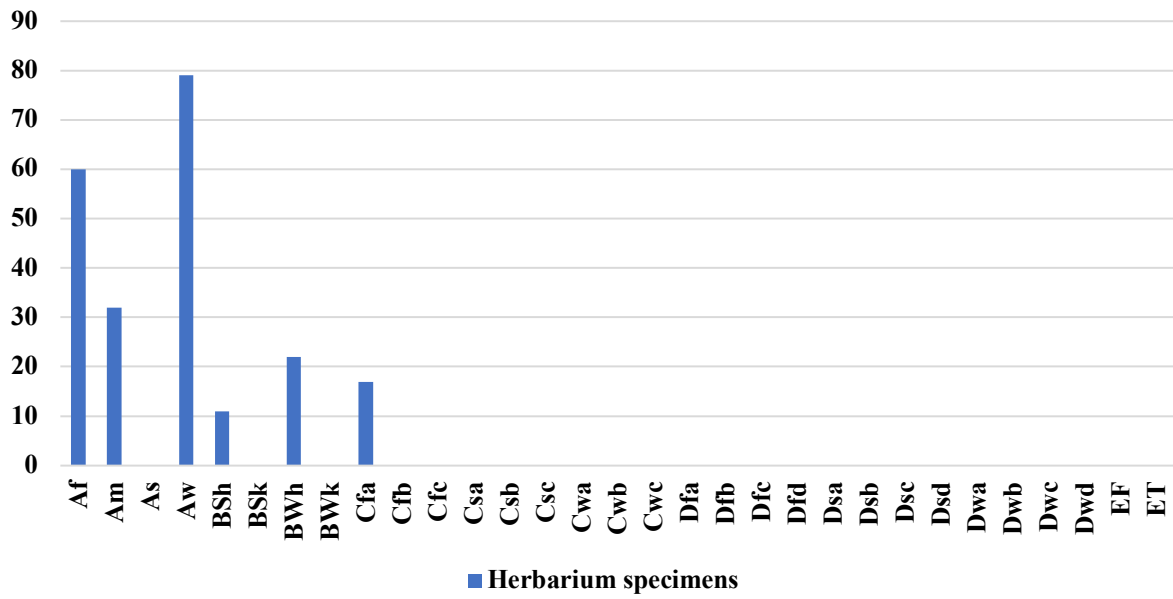

**5.3.2.2.2. Köppen profile, distribution and climate map** – GBIF occurrences of *Thalassia testudinum* K.D.Koenig 1805; herbarium specimens excluding duplicate occurrences (n = 148).

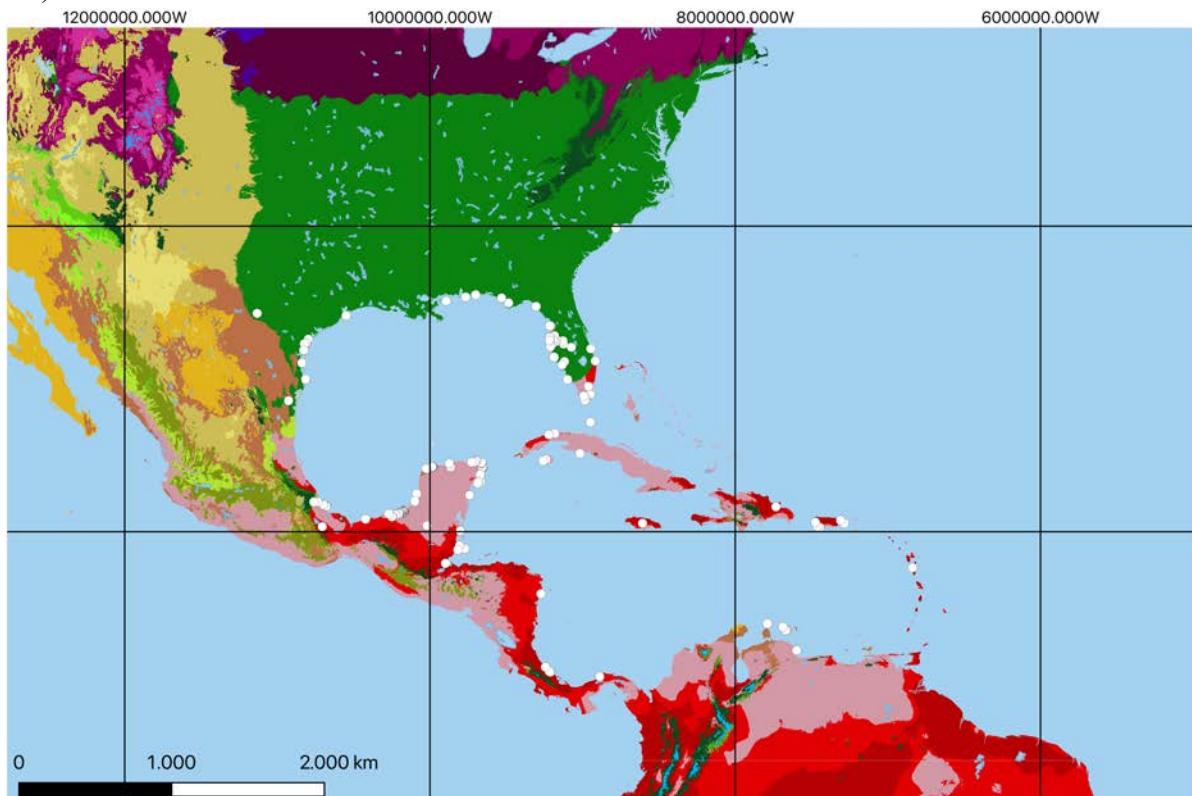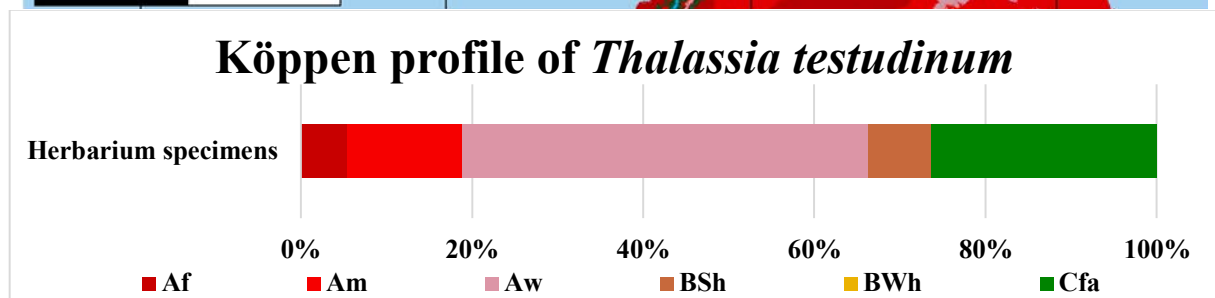

Köppen signatures of *Thalassia testudinum*

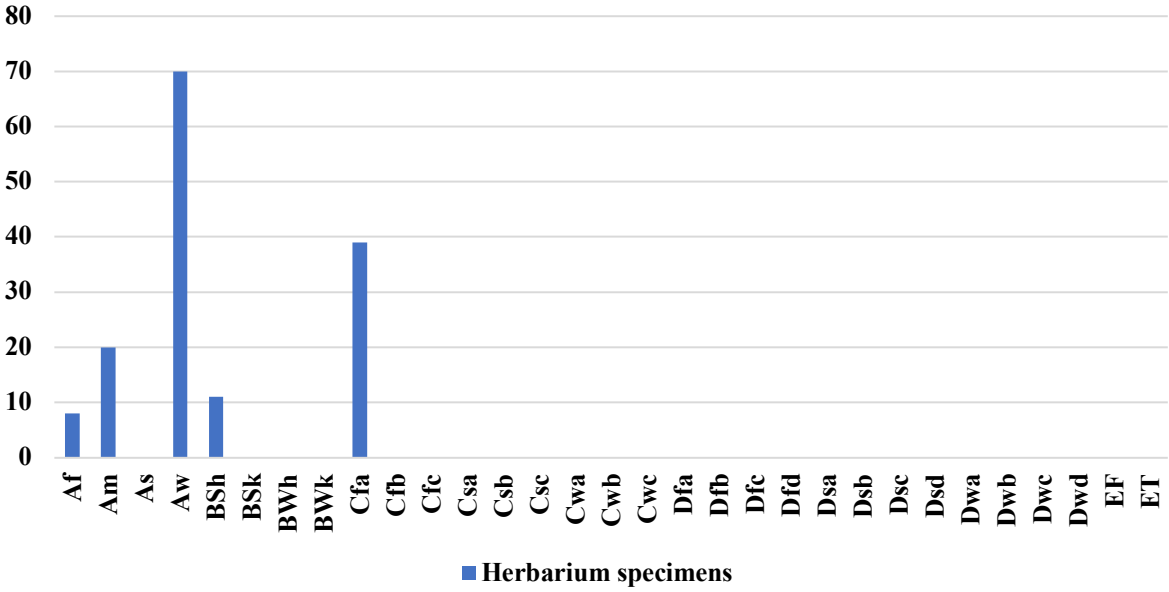

### 5.3.3.1. Genus *Najas* L. 1753.

*arguta*, *N. australis*, *N. baldwinii*, *N. browniana*, *N. chinensis*, *N. conferta*, *N. filifolia*, *N. flexilis*, *N. gracillima*, *N. graminea*, *N. guadalupensis*, *N. hagerupii*, *N. halophila*, *N. horrida*, *N. indica*, *N. kurziana*, *N. madagascariensis*, *N. malesiana*, *N. marina*, *N. oguraensis*, *N. pectinate*, *N. schweinfurthii*, *N. tenuicaulis*, *N. tenuifolia*, *N. tenuissima*, *N. testui*, *N. welwitschia*, *N. wrightiana* (n = 8269).

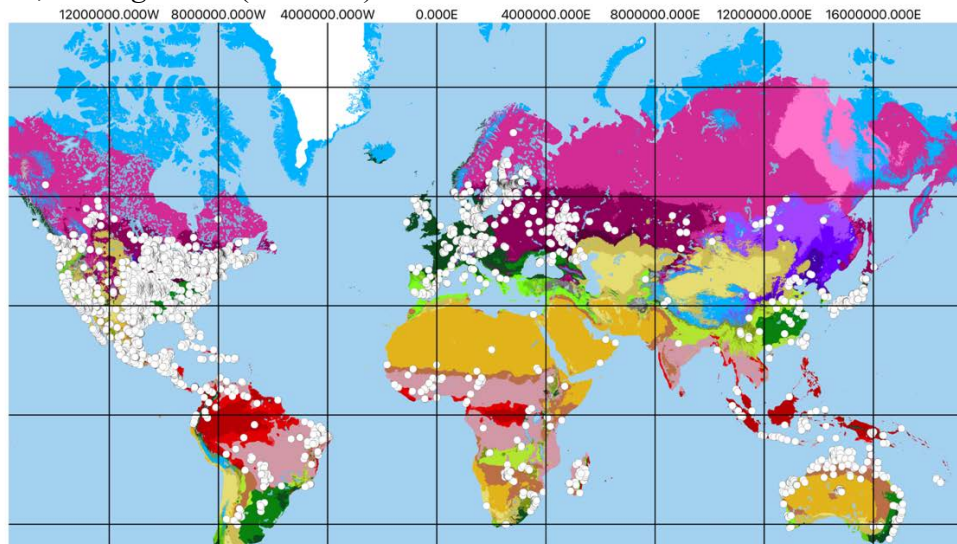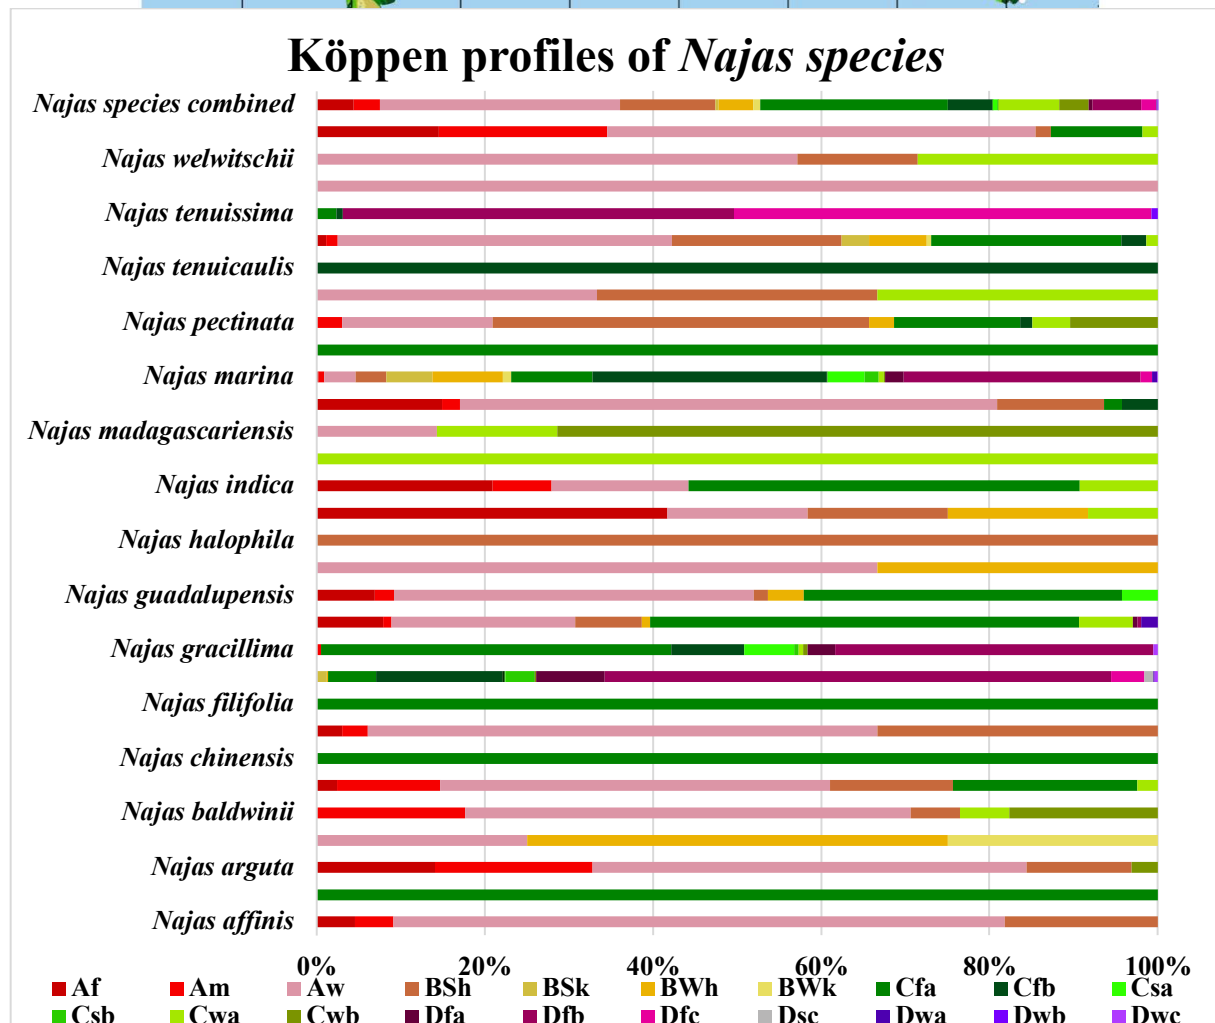

**5.3.3.1.1. Köppen profile, distribution and climate map** – GBIF occurrences of *Najas affinis* Rendle 1900; herbarium specimens excluding duplicate occurrences (n = 22).

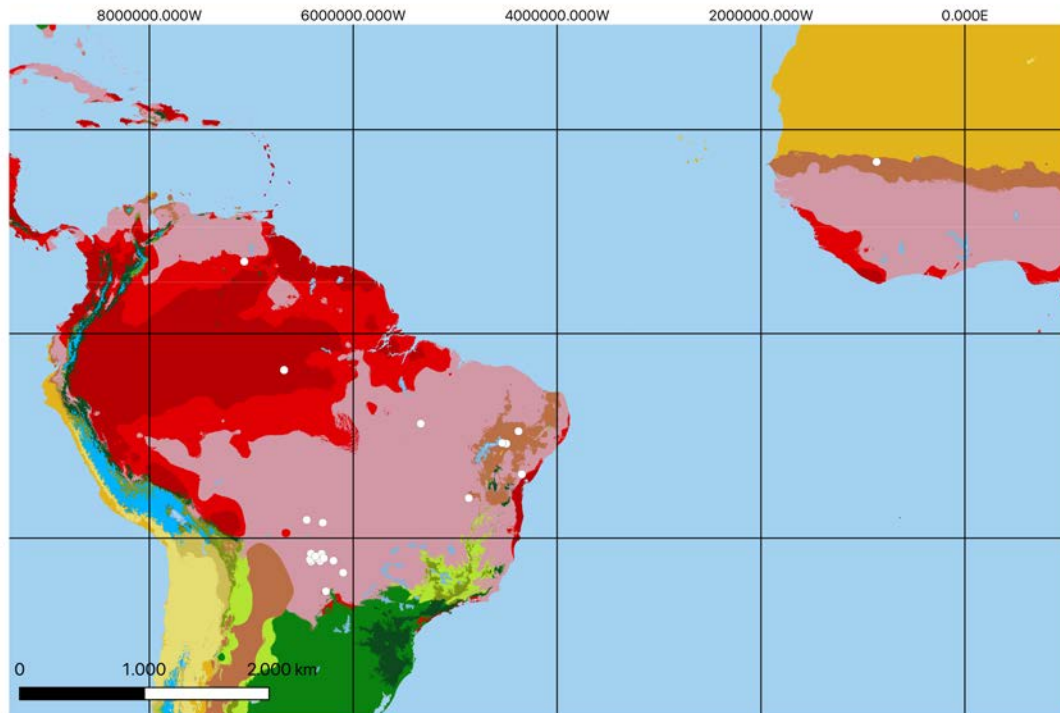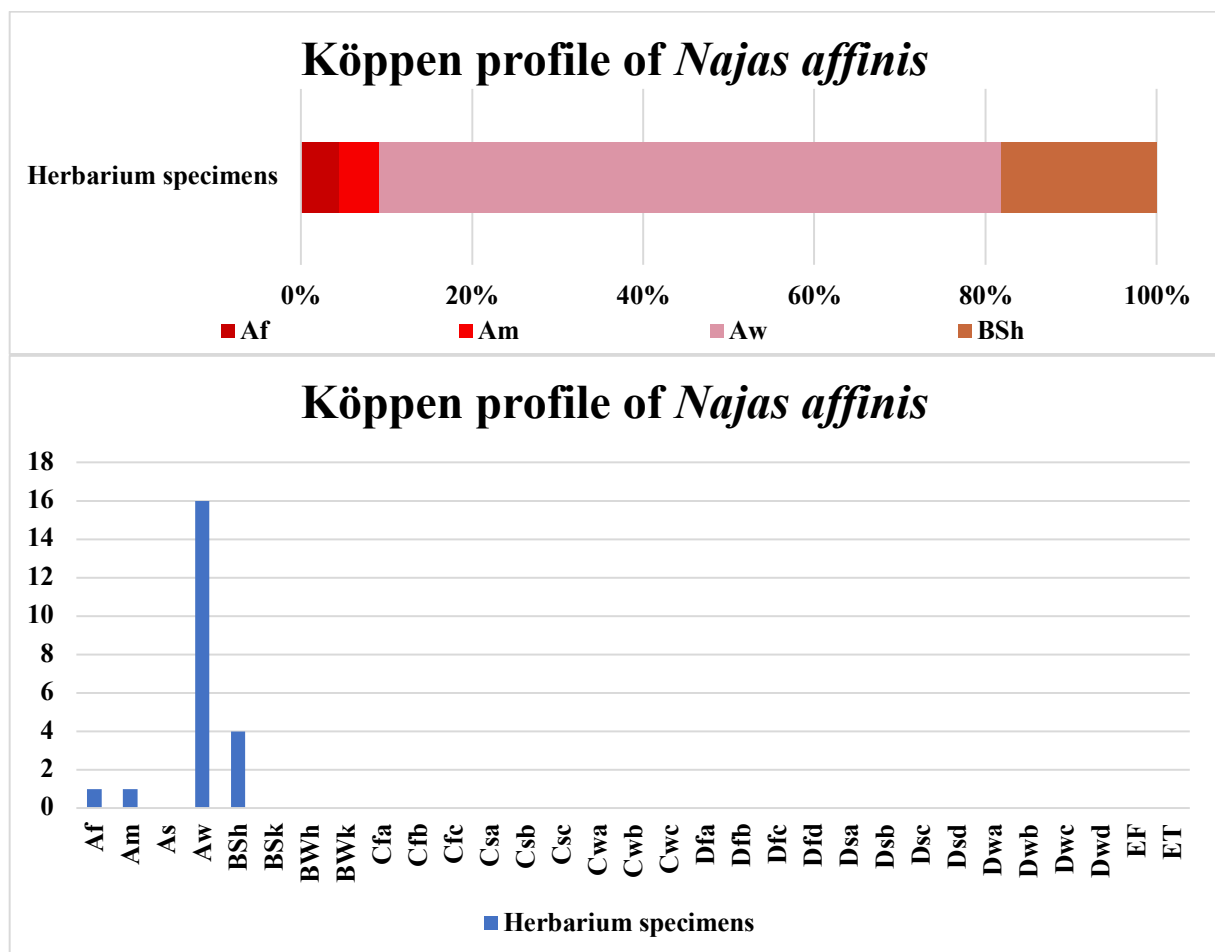

**5.3.3.1.2. Köppen profile, distribution and climate map** – GBIF occurrences of *Najas ancistrocarpa* A.Braun ex Magnus 1870; herbarium specimens excluding duplicate occurrences (n = 10).

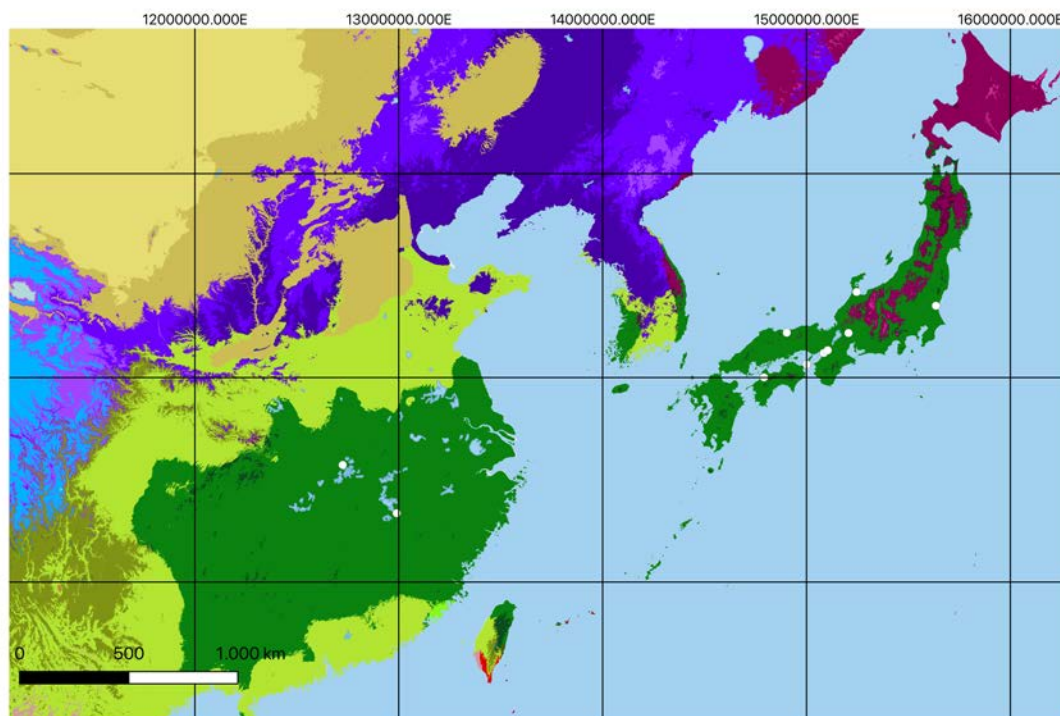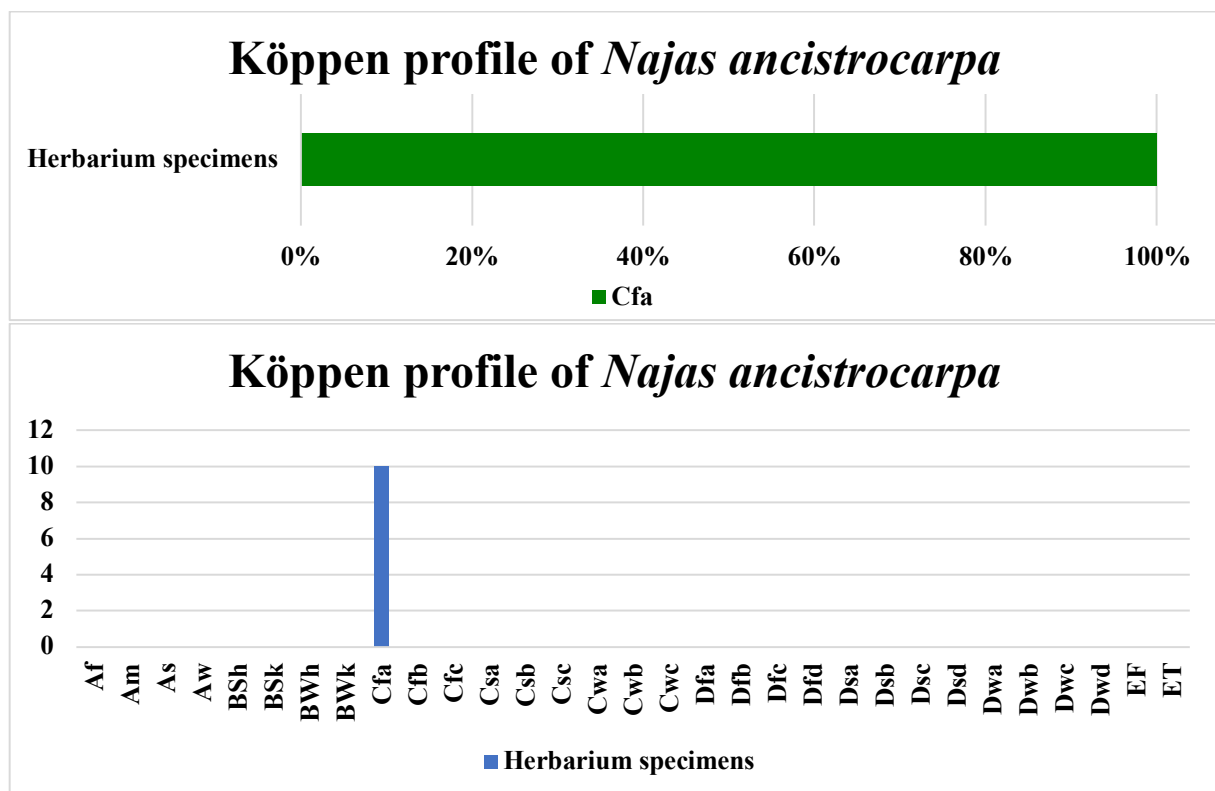

**5.3.3.1.3. Köppen profile, distribution and climate map** – GBIF occurrences of *Najas arguta* Kunth 1816; herbarium specimens excluding duplicate occurrences (n = 64).

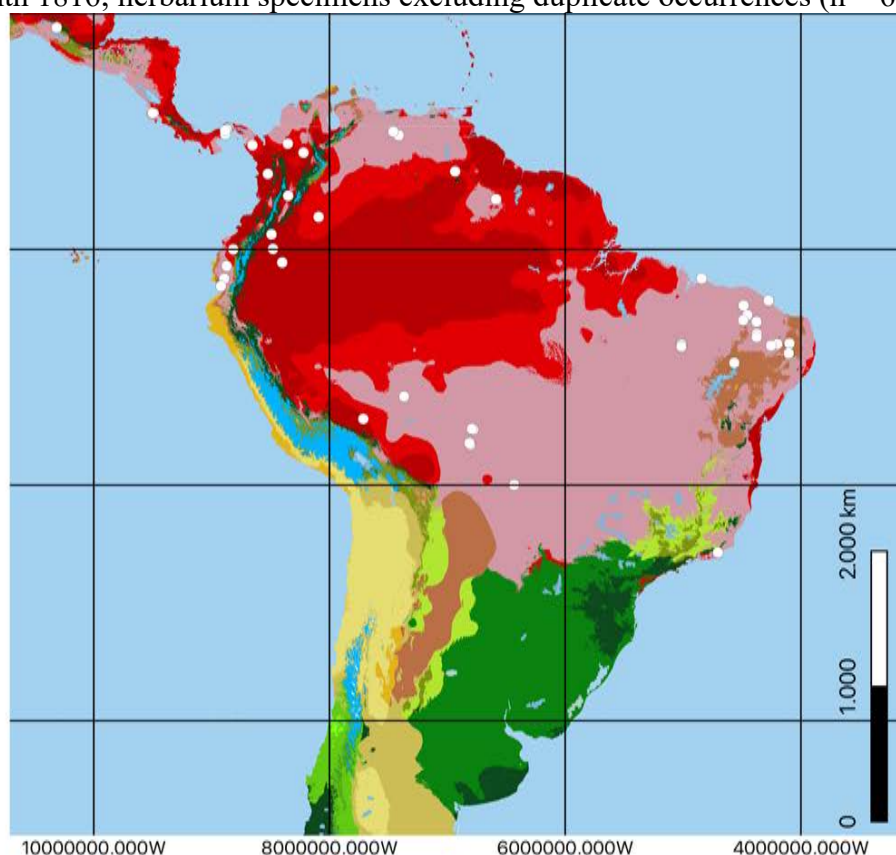

### Köppen profile of *Najas arguta*

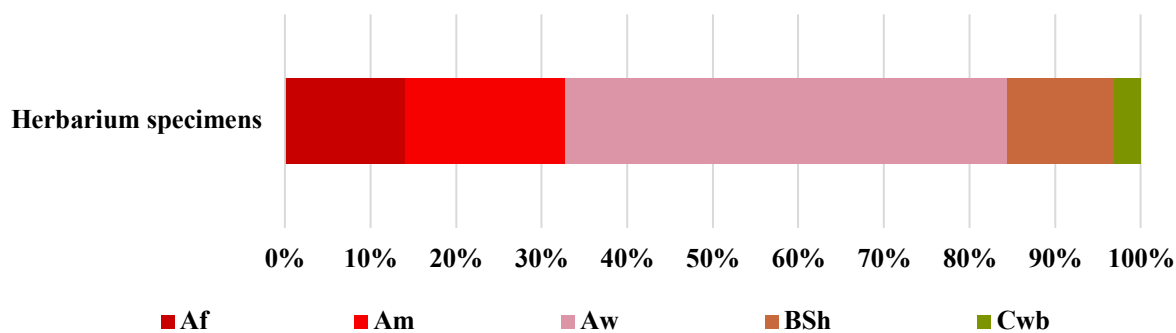

### Köppen profile of *Najas arguta*

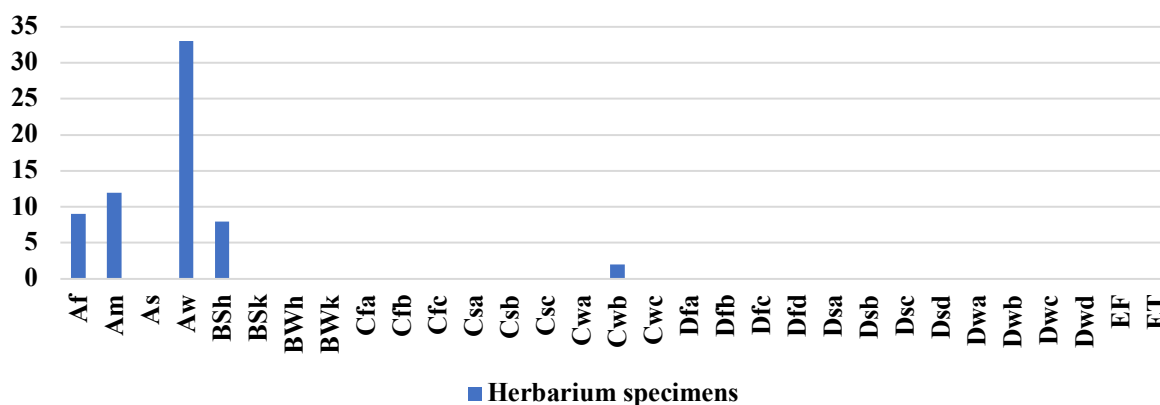

**5.3.3.1.4. Köppen profile, distribution and climate map** – GBIF occurrences of *Najas australis* Borey ex Cham. 1829; herbarium specimens excluding duplicate occurrences (n = 4).

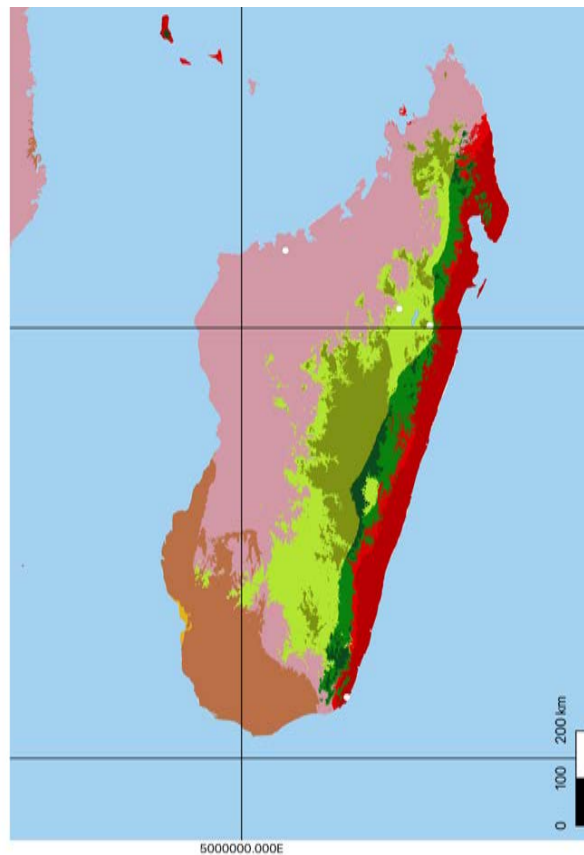

### Köppen profile of *Najas australis*

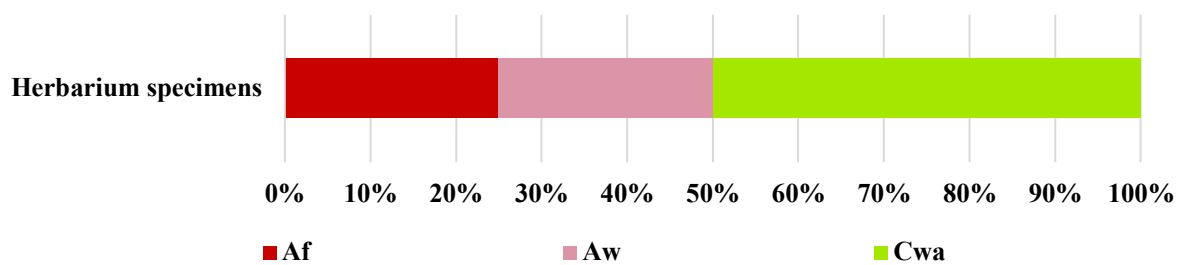

### Köppen profile of *Najas australis*

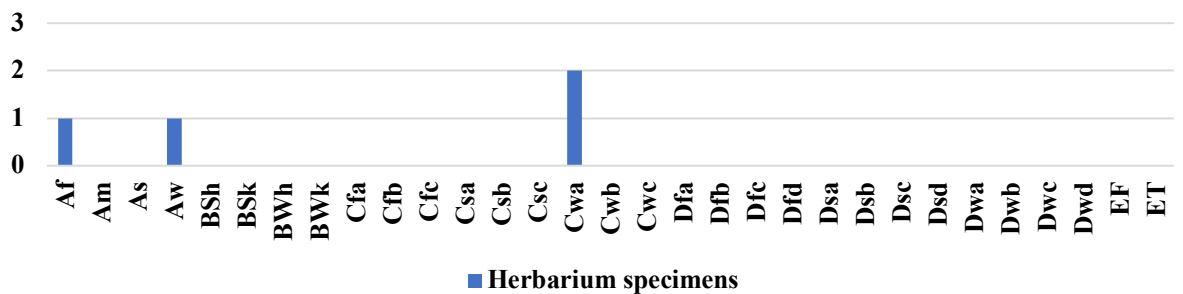

**5.3.3.1.5. Köppen profile, distribution and climate map** – GBIF occurrences of *Najas baldwinii* Horn 1950; herbarium specimens excluding duplicate occurrences (n = 17).

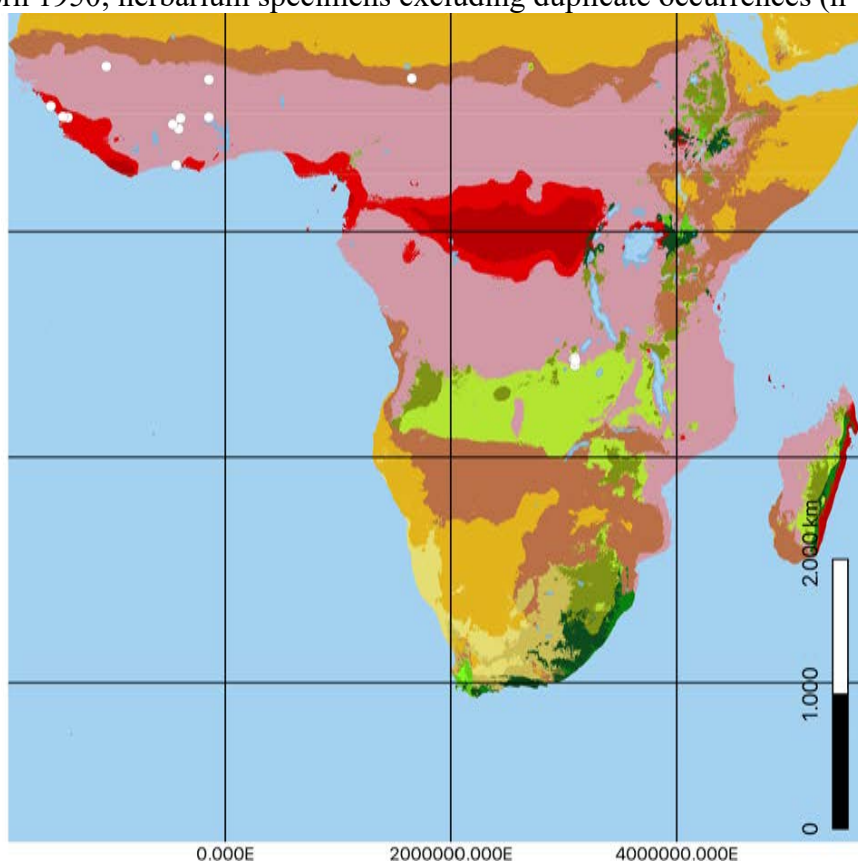

**Köppen profile of *Najas baldwinii***

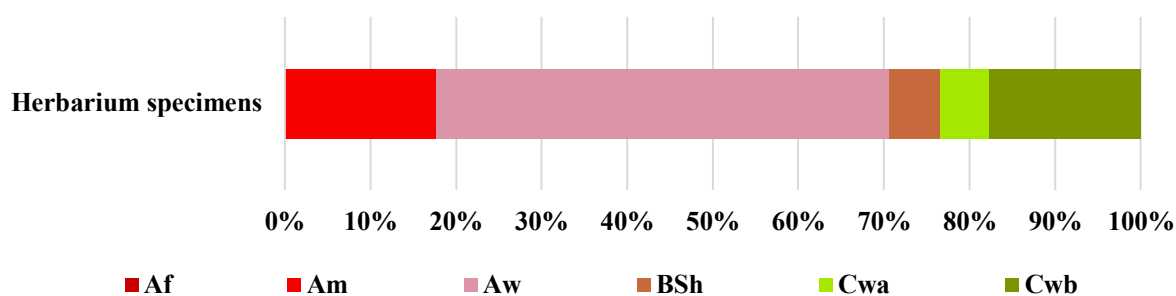

**Köppen profile of *Najas baldwinii***

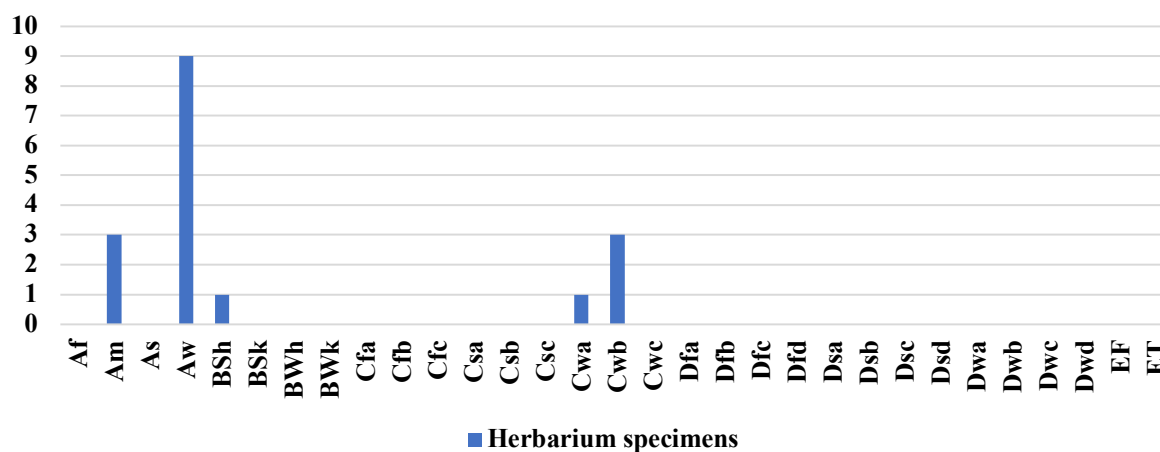

**5.3.3.1.6. Köppen profile, distribution and climate map** – GBIF occurrences of *Najas browniana* Rendle 1899; herbarium specimens excluding duplicate occurrences (n = 41).

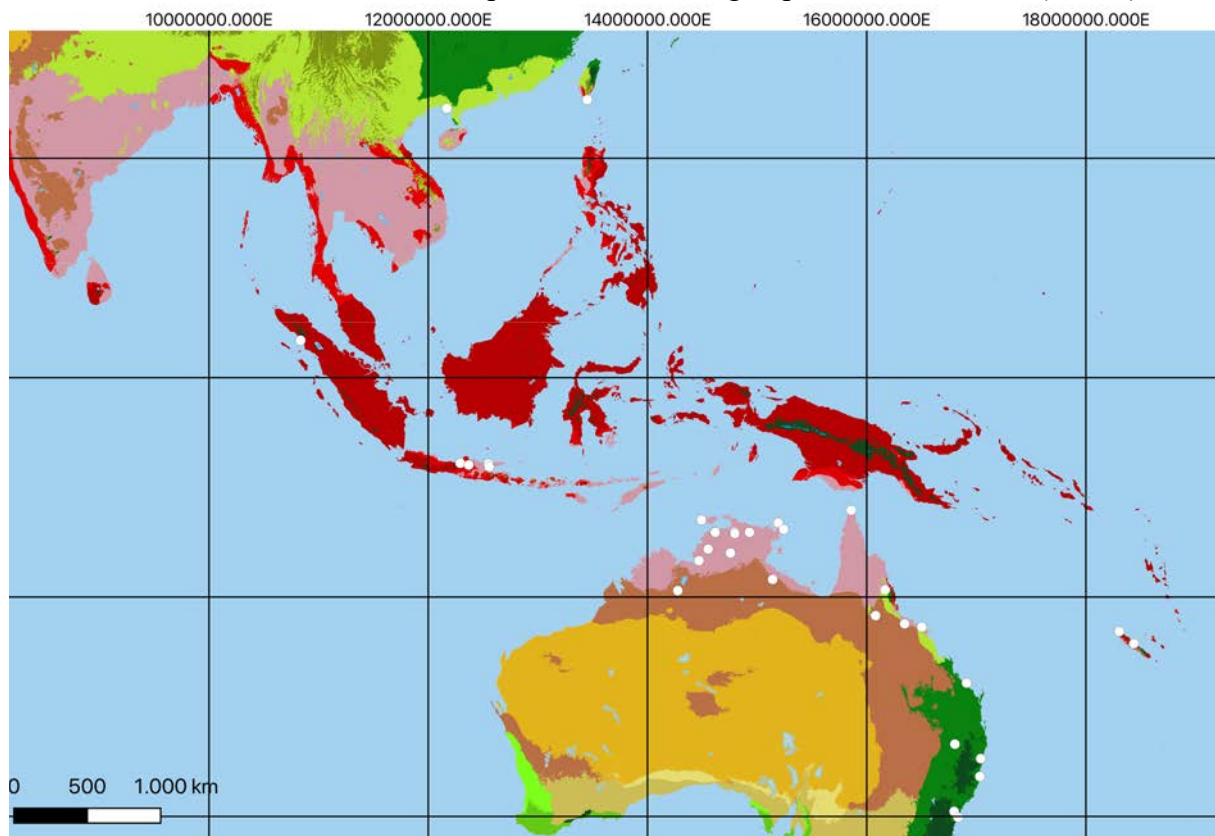

**Köppen profile of *Najas browniana***

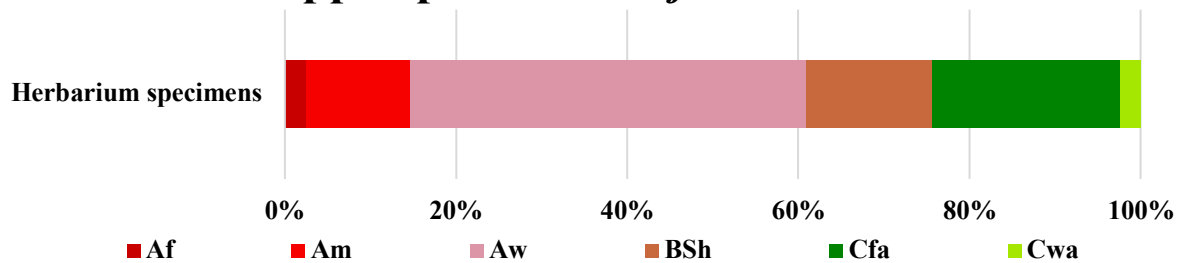

**Köppen profile of *Najas browniana***

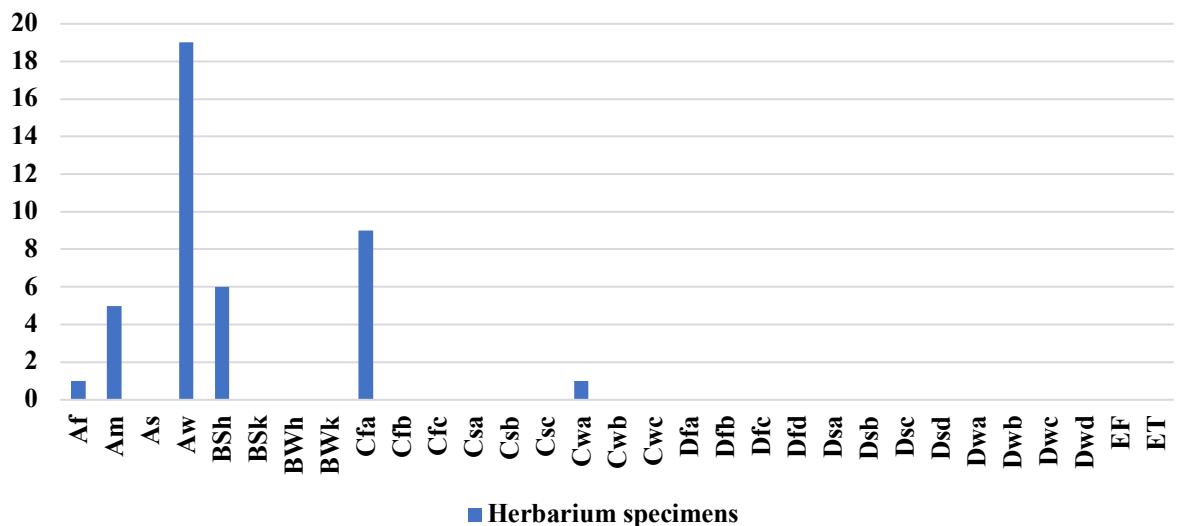

**5.3.3.1.7. Köppen profile, distribution and climate map** – GBIF occurrences of *Najas chinensis* N.Z.Wang 1985; herbarium specimens excluding duplicate occurrences (n = 6).

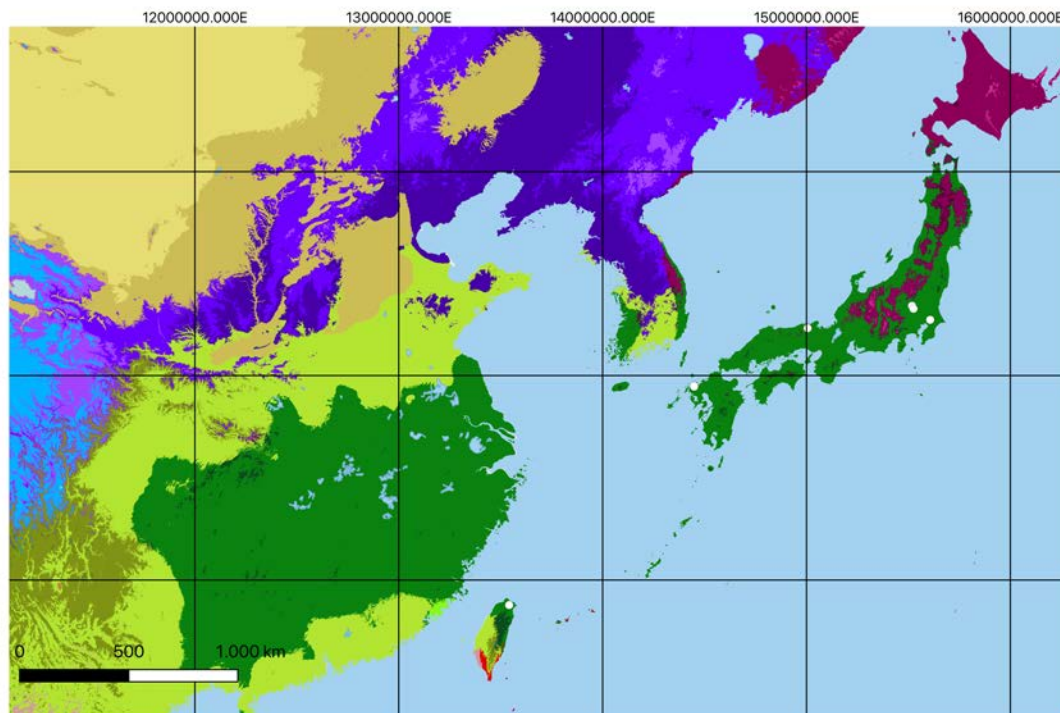

### Köppen profile of *Najas chinensis*

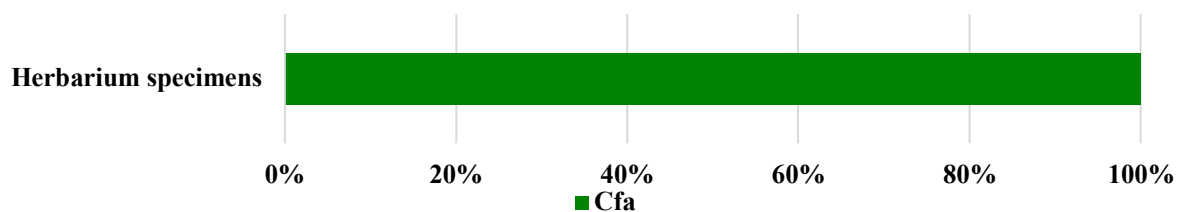

### Köppen profile of *Najas chinensis*

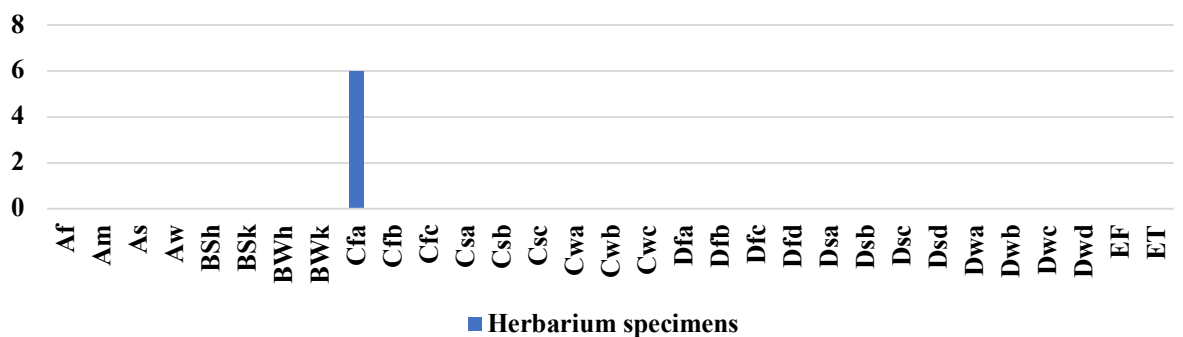

**5.3.3.1.8. Köppen profile, distribution and climate map** – GBIF occurrences of *Najas conferta* (A.Braun 1864) A.Braun 1868; herbarium specimens excluding duplicate occurrences (n = 33).

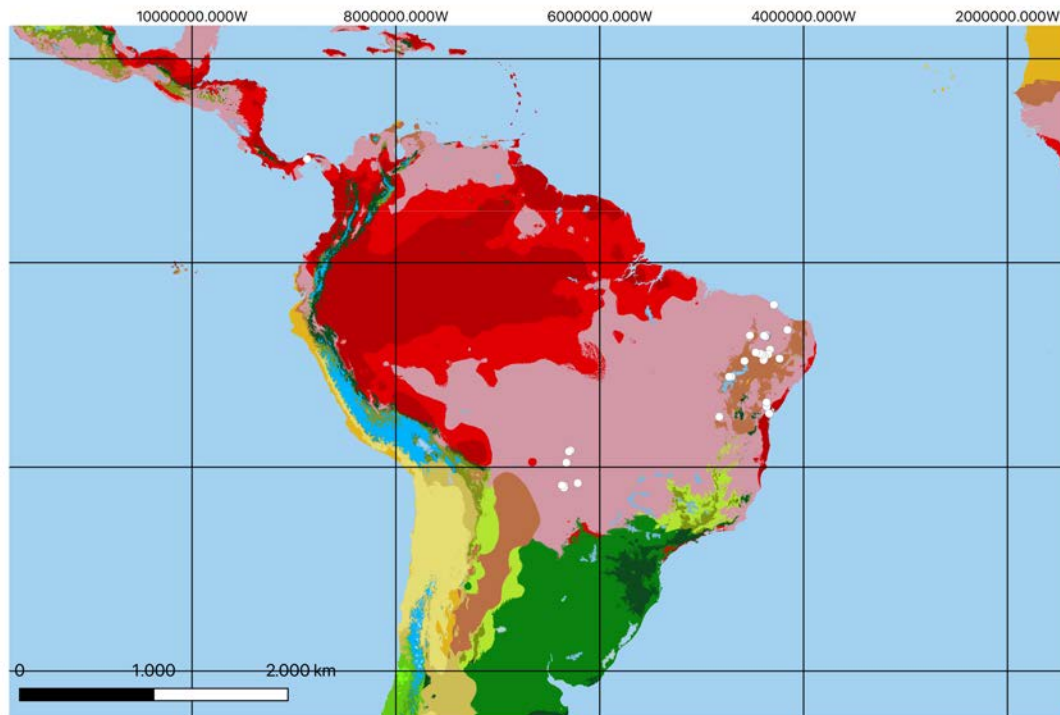

### Köppen profile of *Najas conferta*

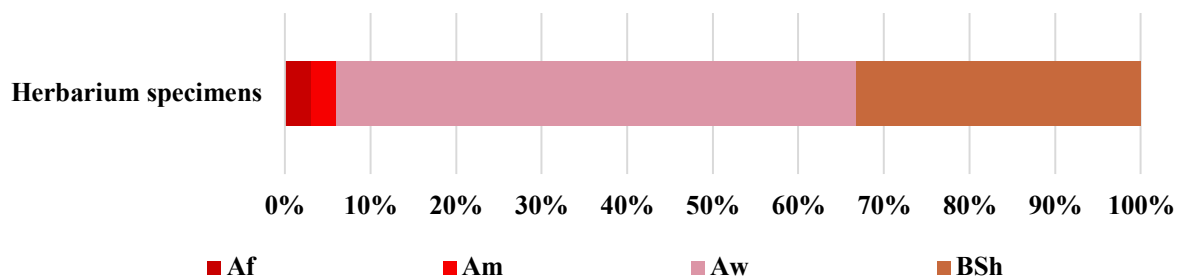

### Köppen profile of *Najas conferta*

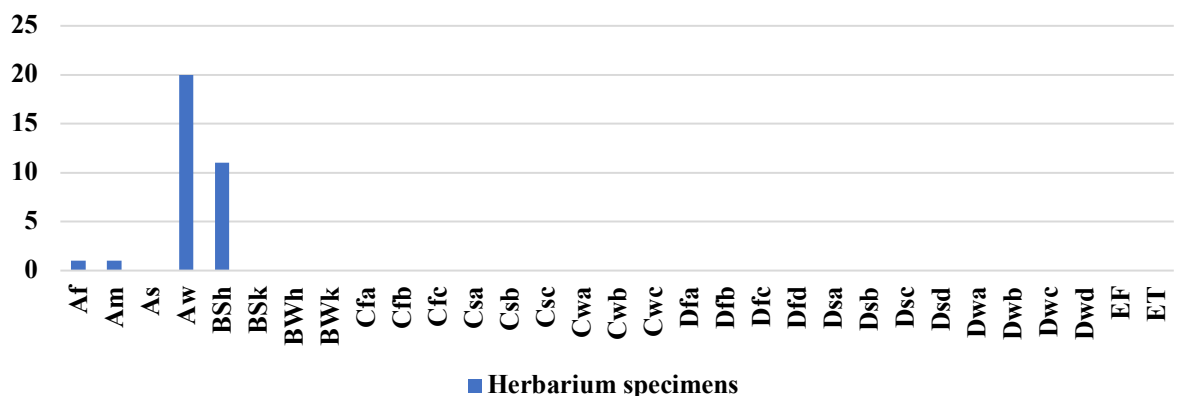

**5.3.3.1.9. Köppen profile, distribution and climate map** – GBIF occurrences of *Najas filifolia* R.R.Haynes 1985; herbarium specimens excluding duplicate occurrences (n = 6).

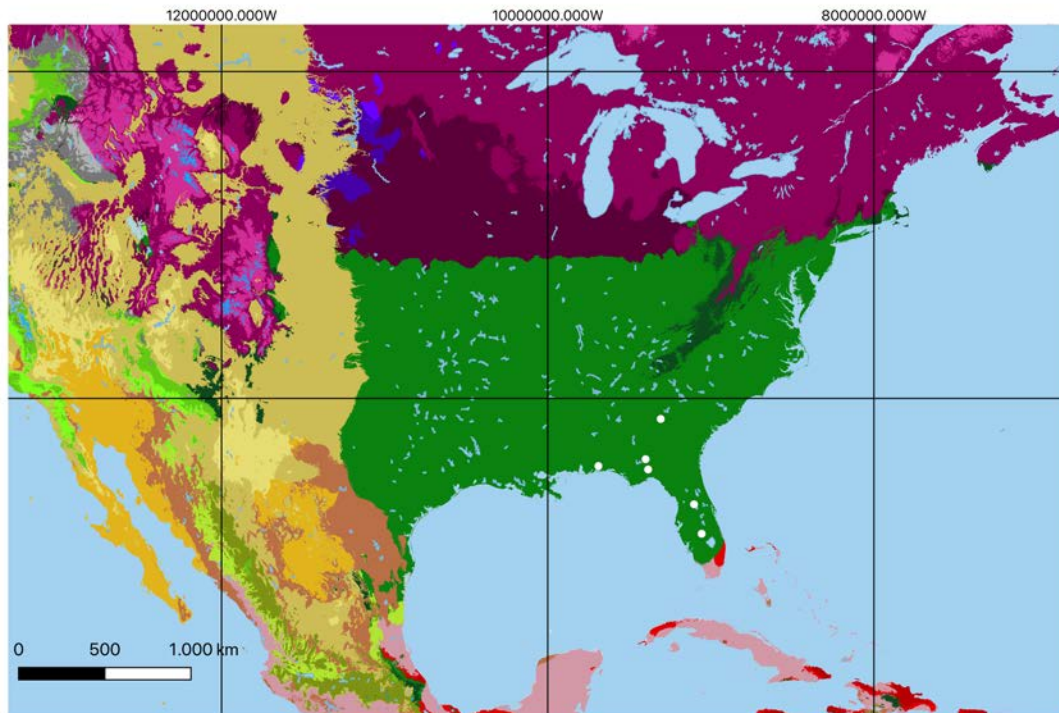

**Köppen profile of *Najas filifolia***

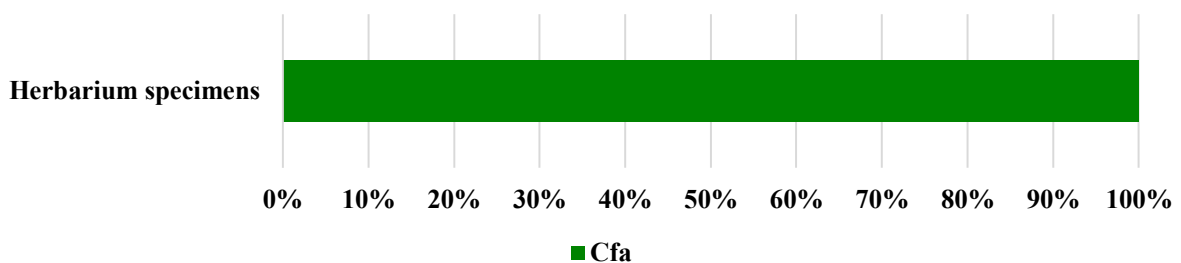

**Köppen profile of *Najas filifolia***

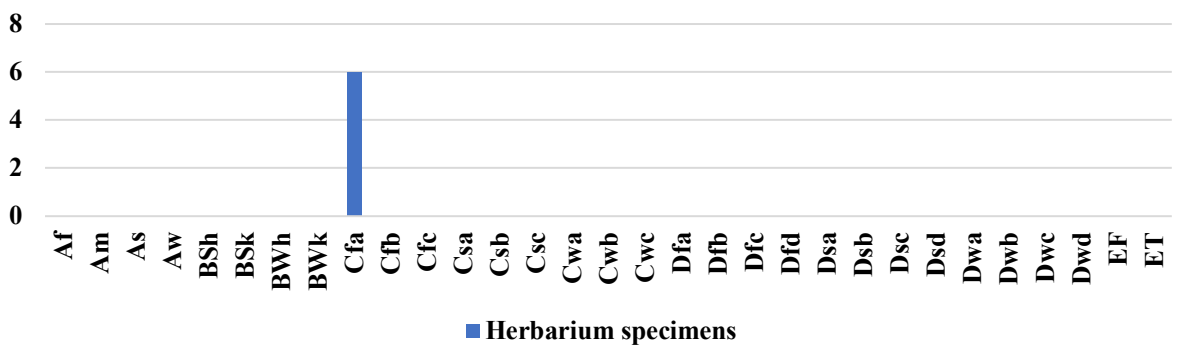

**5.3.3.1.10. Köppen profile, distribution and climate map – GBIF occurrences of *Najas flexilis* (Willd. 1801) Rostk. & W.L.E.Schmidt 1924; herbarium specimens excluding duplicate occurrences (n = 1419).**

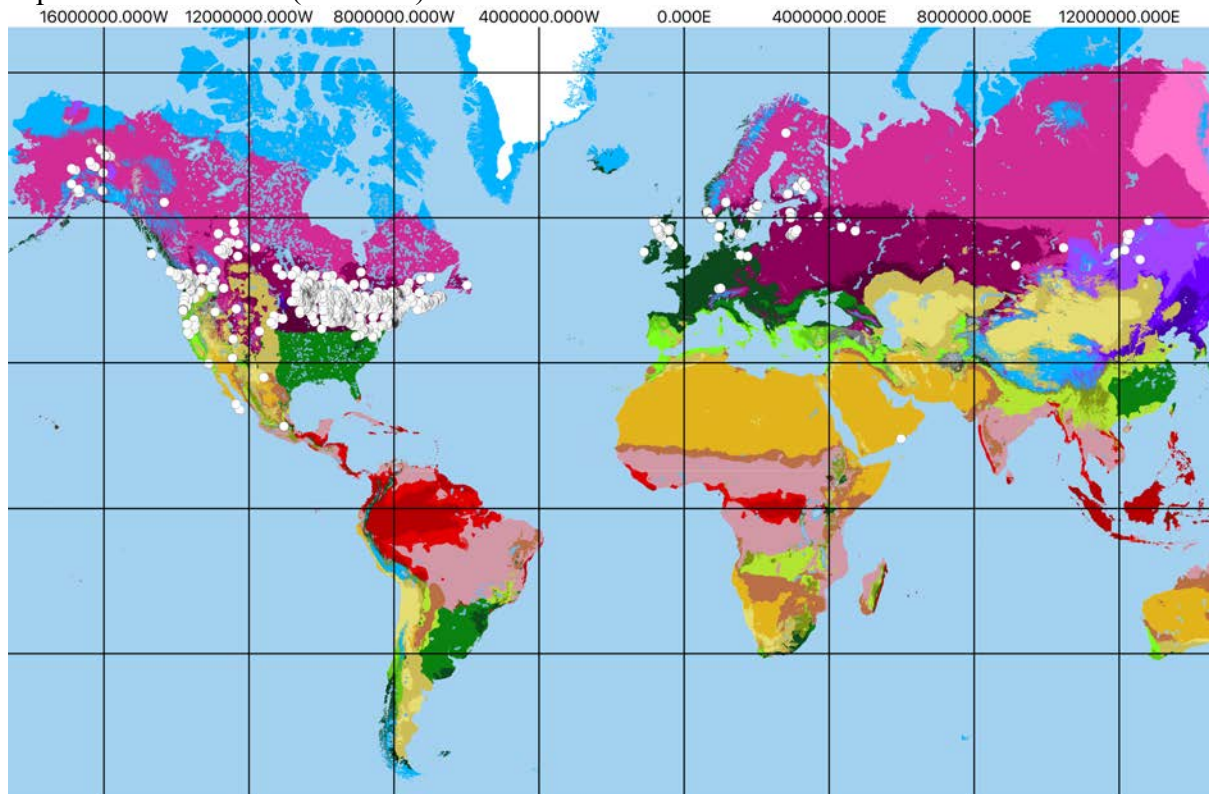

**Köppen profile of *Najas flexilis***

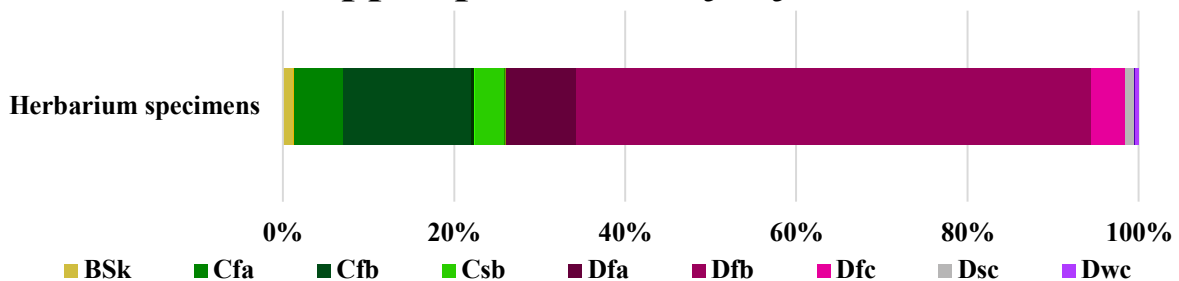

**Köppen profile of *Najas flexilis***

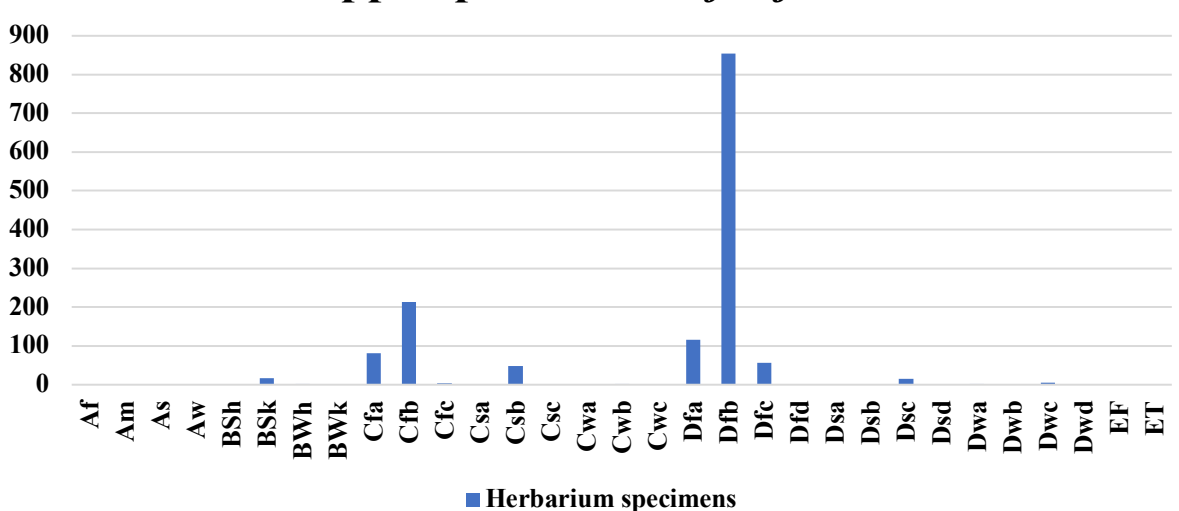

**5.3.3.1.11. Köppen profile, distribution and climate map – GBIF occurrences of *Najas gracillima* (A.Braun ex Engelm. 1868) Magnus 1870; herbarium specimens excluding duplicate occurrences (n = 185).**

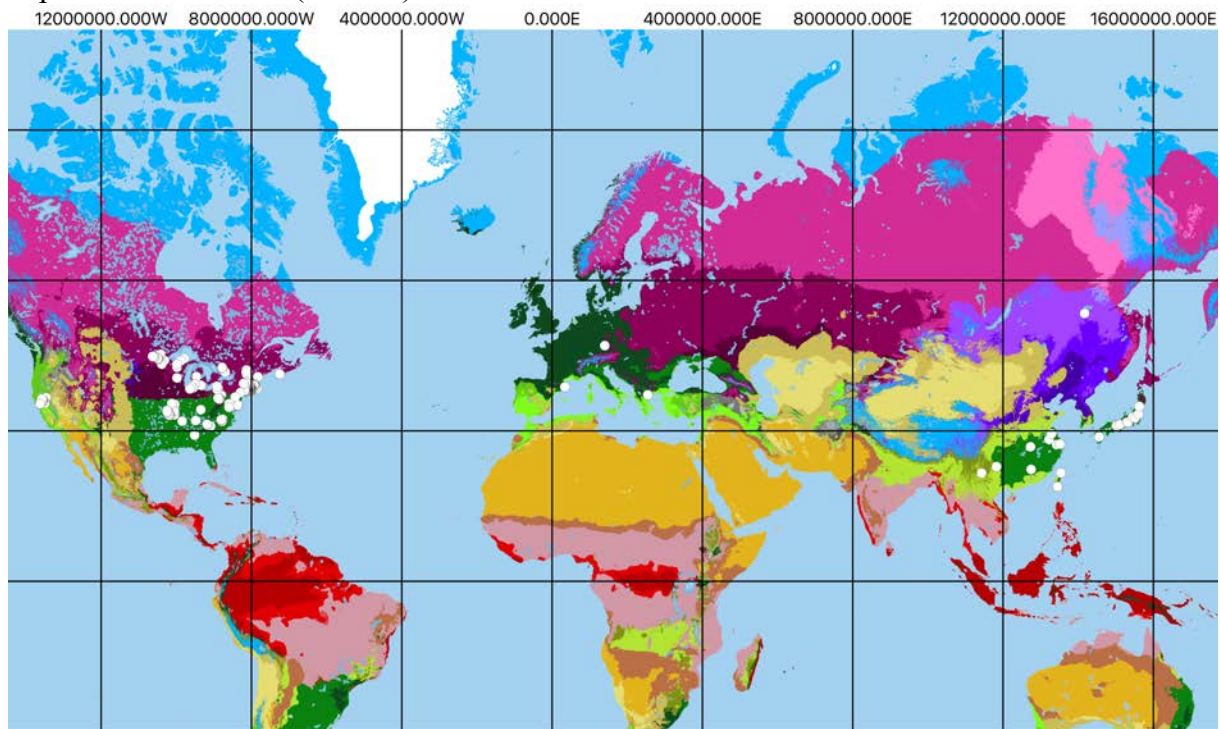

**Köppen profile of *Najas gracillima***

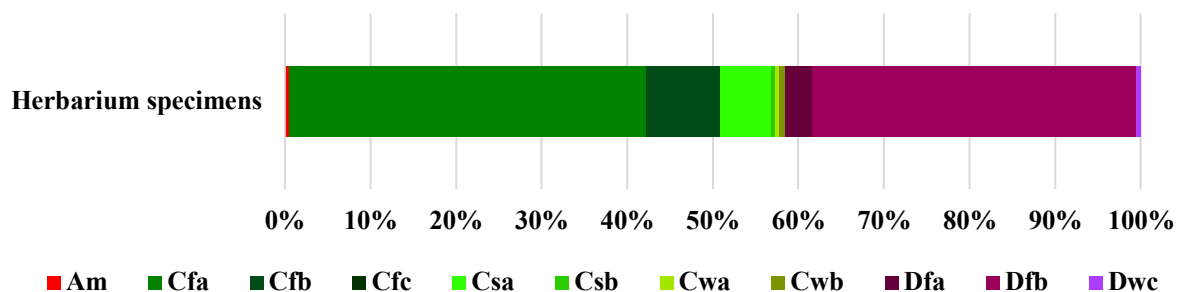

**Köppen profile of *Najas gracillima***

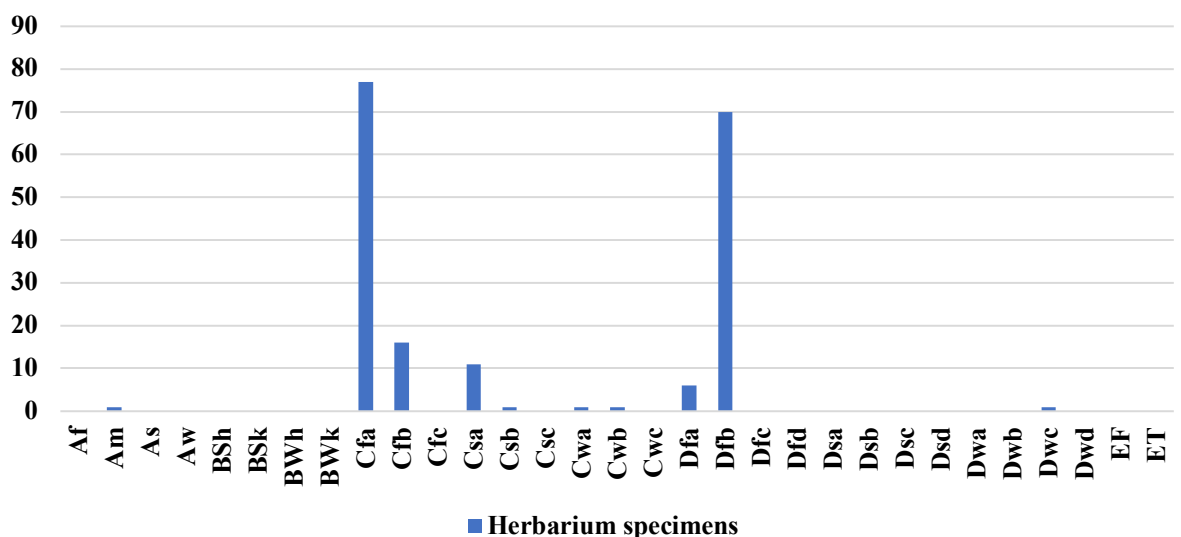

**5.3.3.1.12. Köppen profile, distribution and climate map** – GBIF occurrences of *Najas graminea* Delile 1814; herbarium specimens excluding duplicate occurrences (n = 202).

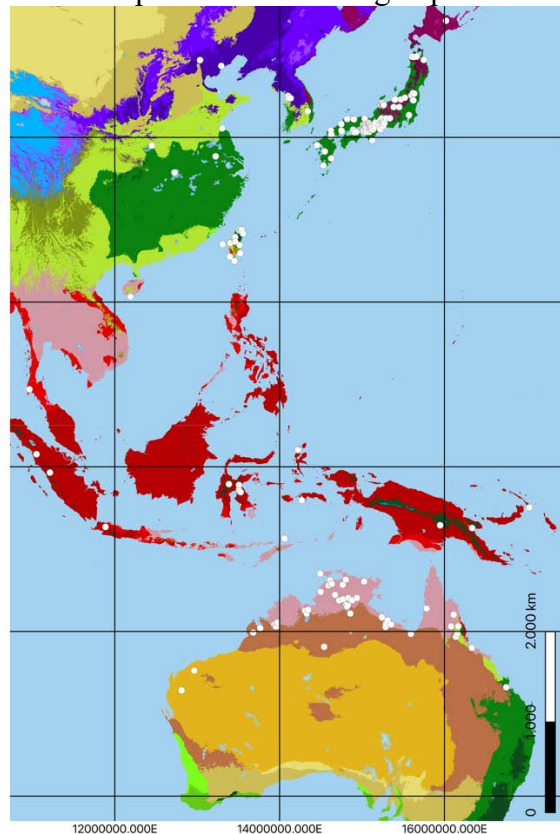

### Köppen profile of *Najas graminea*

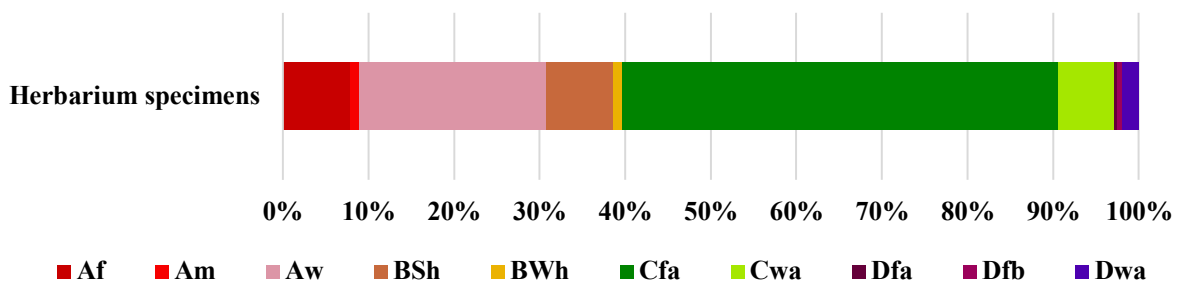

### Köppen profile of *Najas graminea*

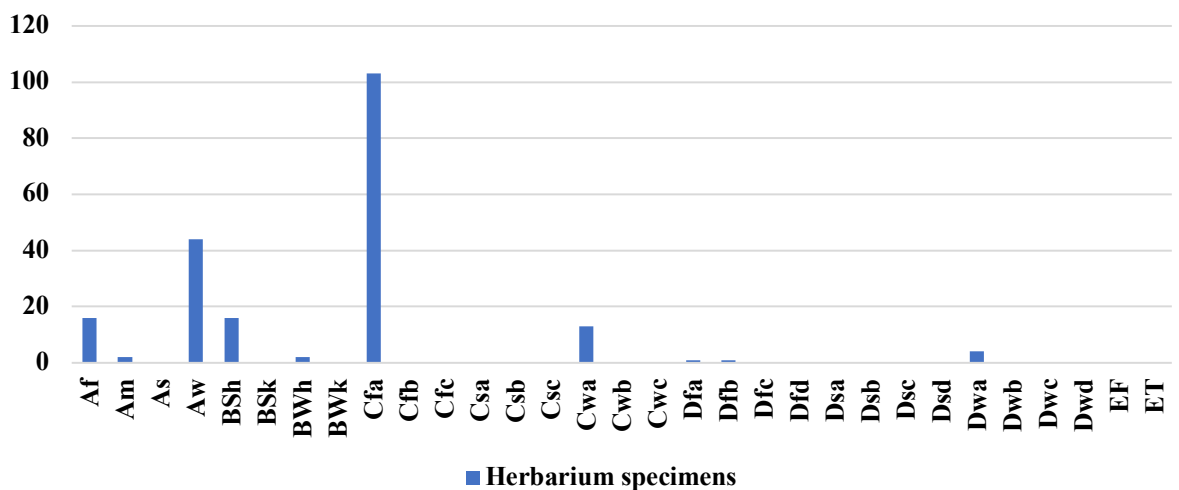

**5.3.3.1.13. Köppen profile, distribution and climate map – GBIF occurrences of *Najas guadalupensis* (Spreng. 1824) Magnus 1870; herbarium specimens excluding duplicate occurrences (n = 1387).**

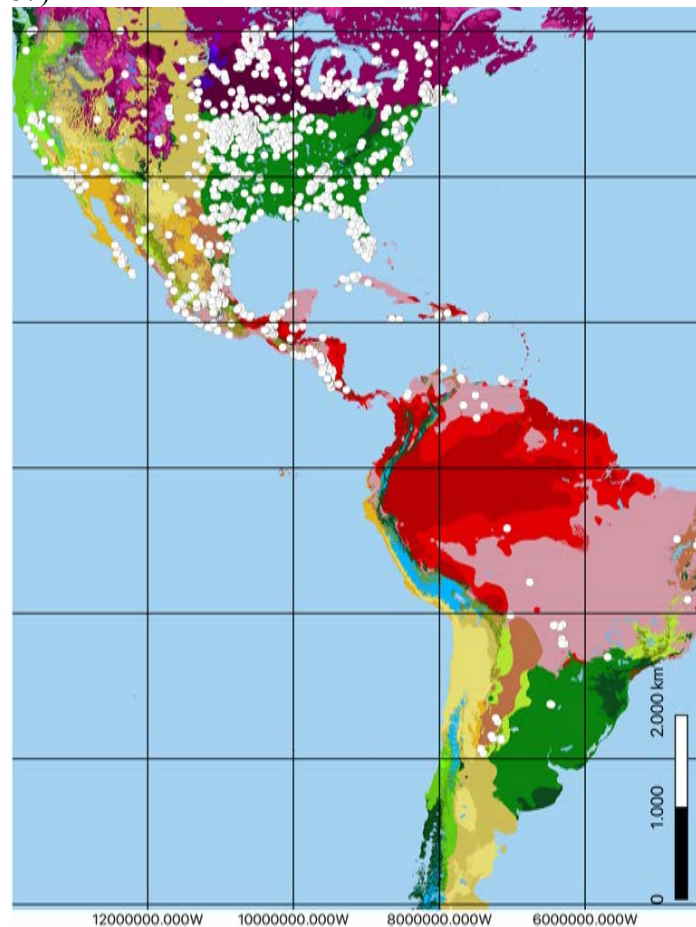

### Köppen profile of *Najas guadalupensis*

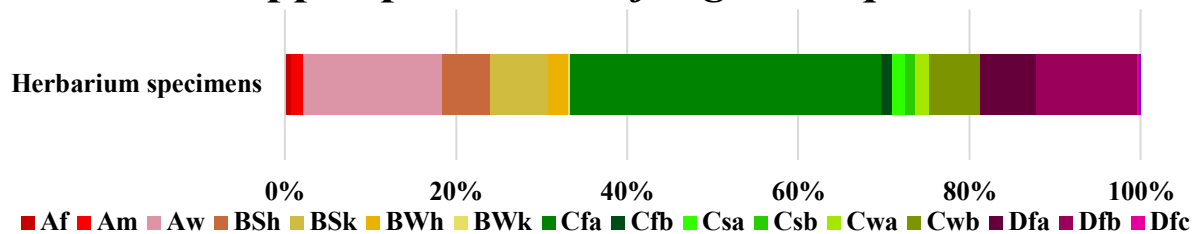

### Köppen profile of *Najas guadalupensis*

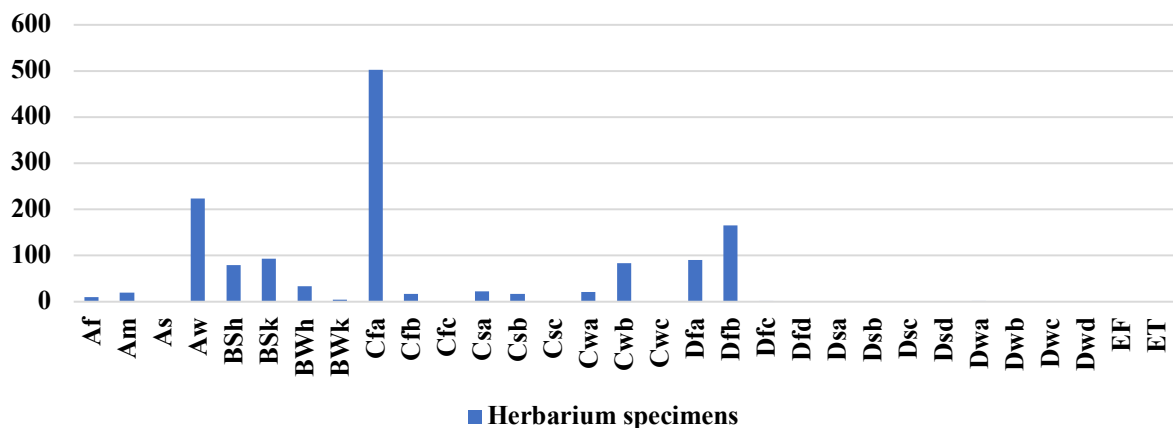

**5.3.3.1.14. Köppen profile, distribution and climate map** – GBIF occurrences of *Najas hagerupii* Horn 1952; herbarium specimens excluding duplicate occurrences (n = 3).

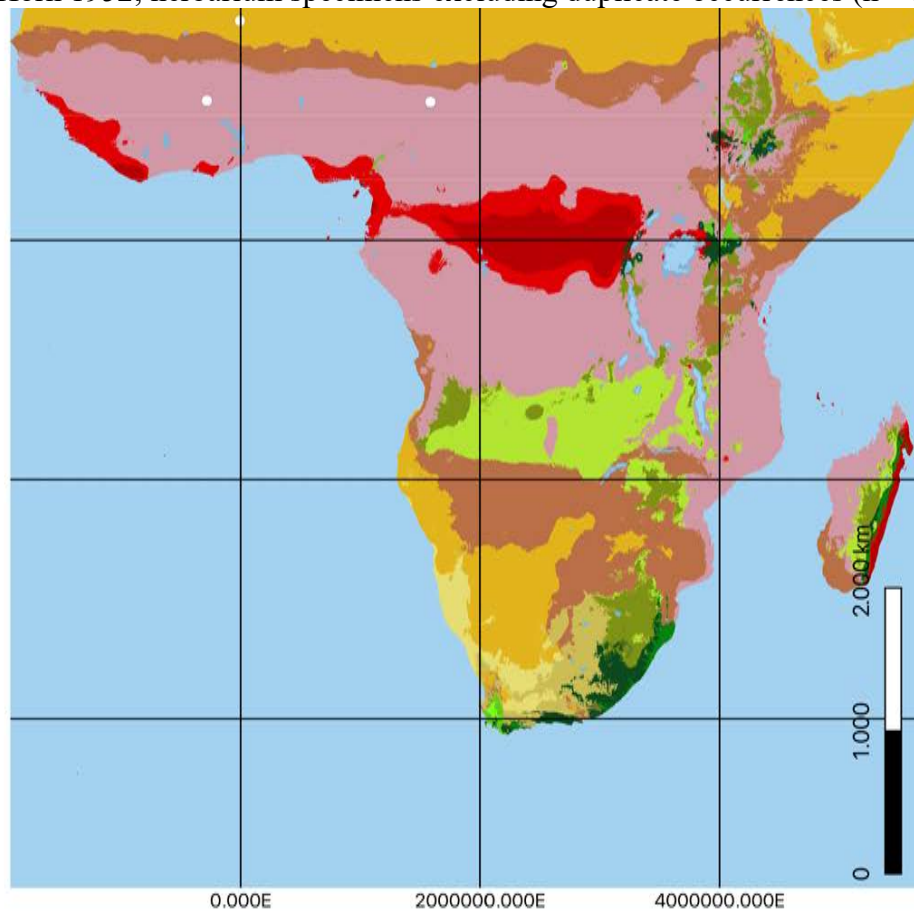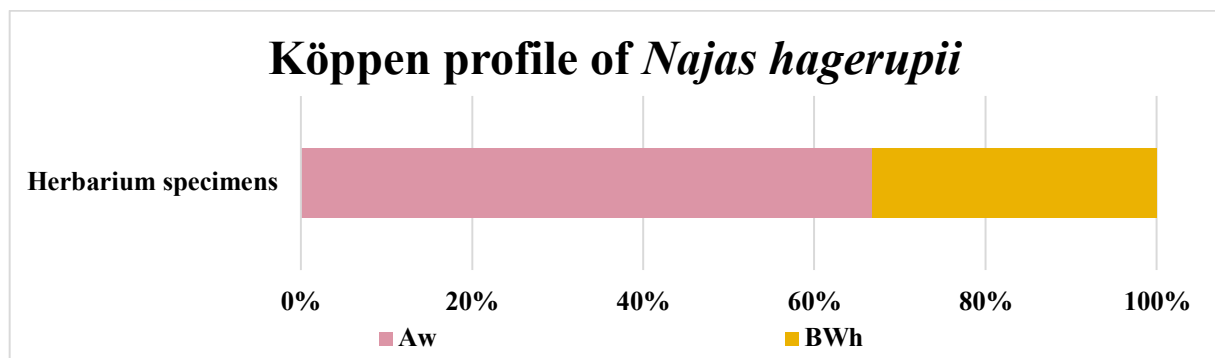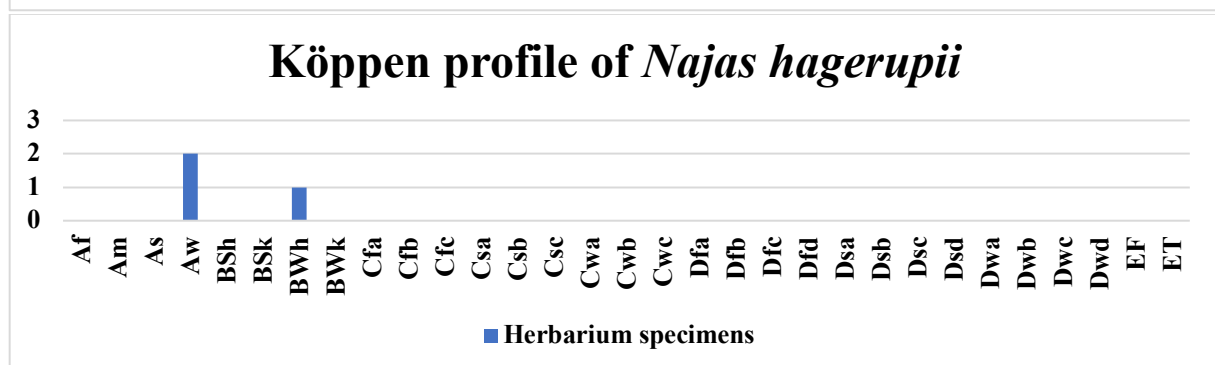

**5.3.3.1.15. Köppen profile, distribution and climate map – GBIF occurrences of *Najas halophila* L.** Triest 1988 herbarium specimens excluding duplicate occurrences (n = 1).

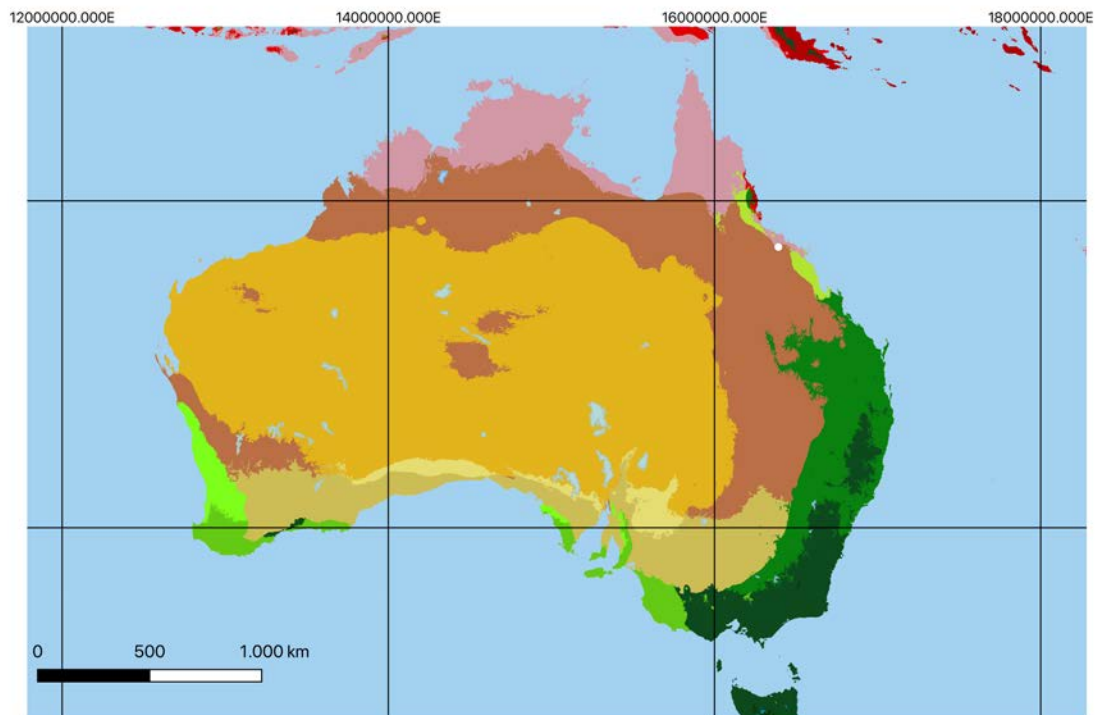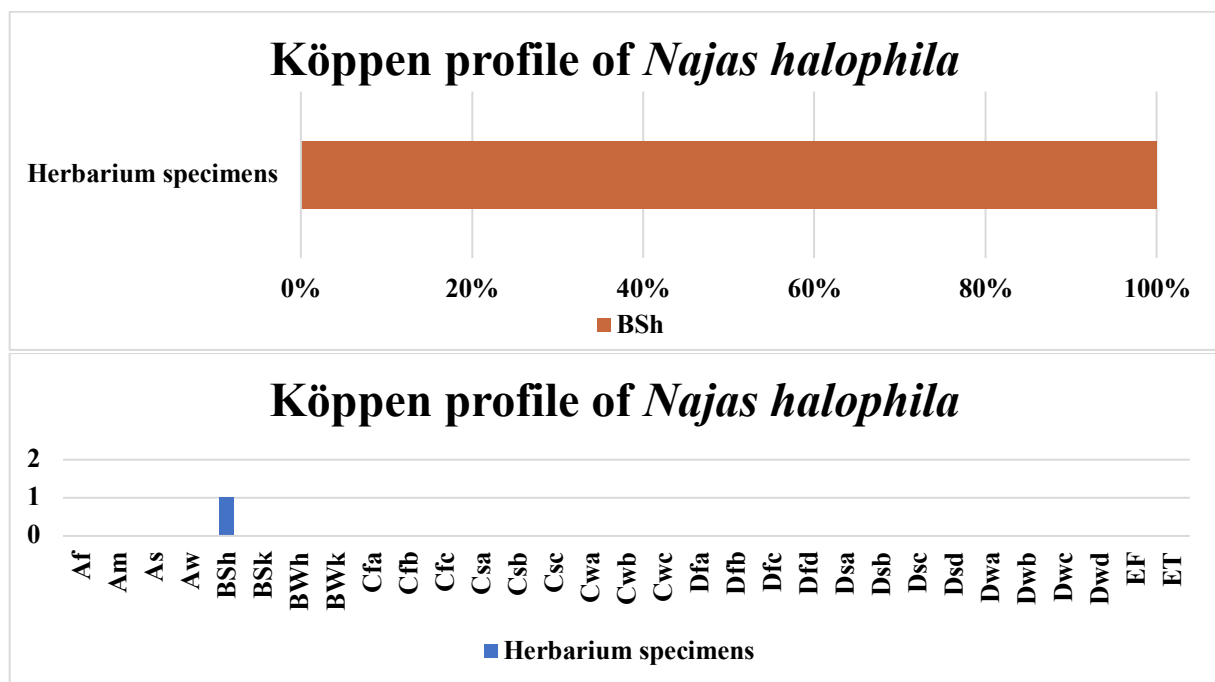

**5.3.3.1.16. Köppen profile, distribution and climate map – GBIF occurrences of *Najas horrida* A.Braun 1870 herbarium specimens excluding duplicate occurrences (n = 12).**

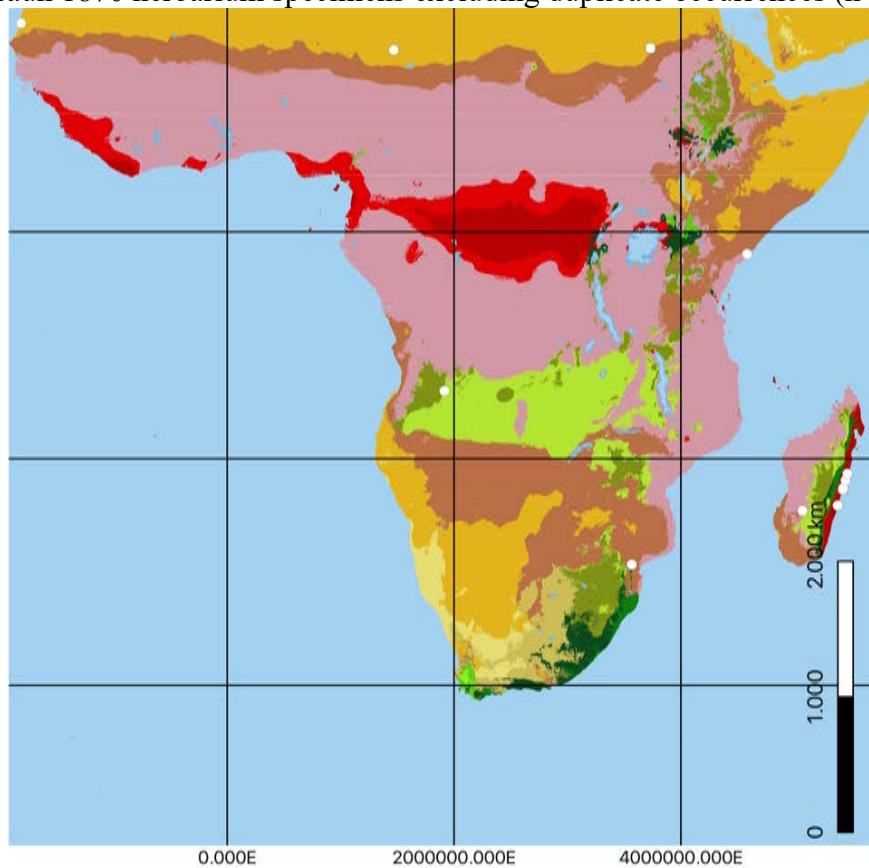

**Köppen profile of *Najas horrida***

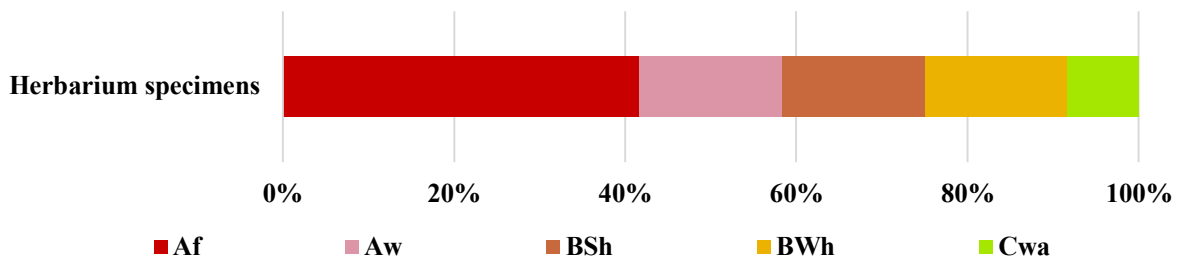

**Köppen profile of *Najas horrida***

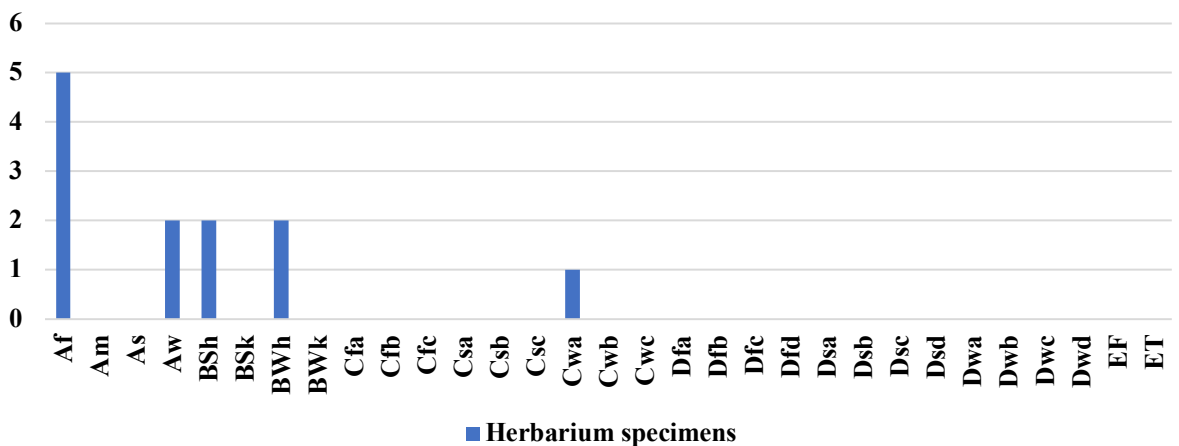

**5.3.3.1.17. Köppen profile, distribution and climate map** – GBIF occurrences of *Najas indica* (Willd. 1801) Cham. 1829; herbarium specimens excluding duplicate occurrences (n = 43).

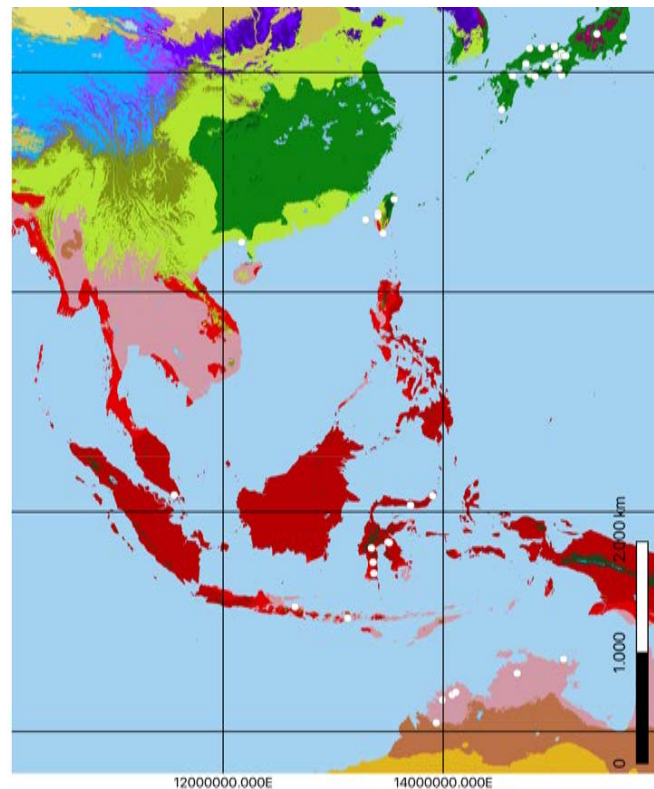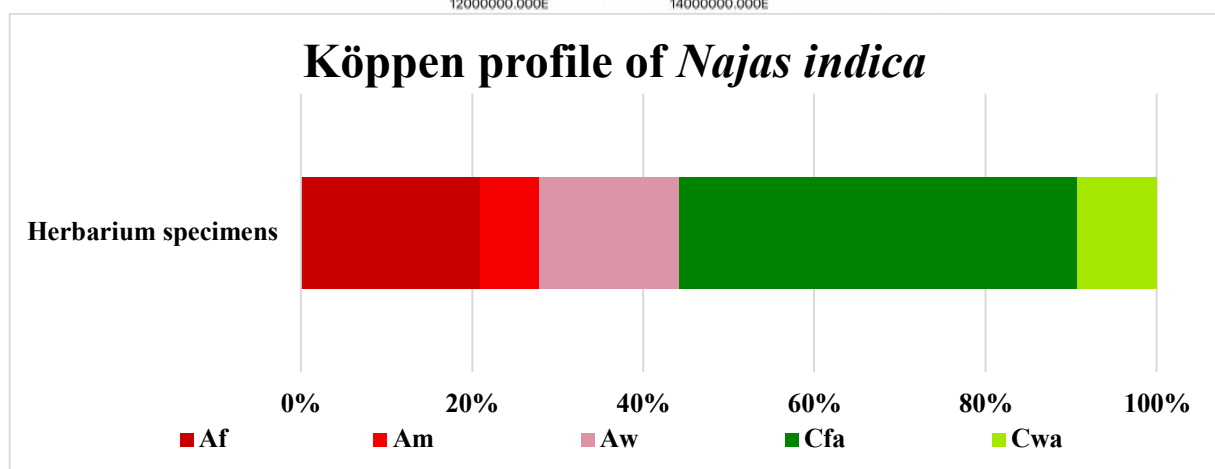

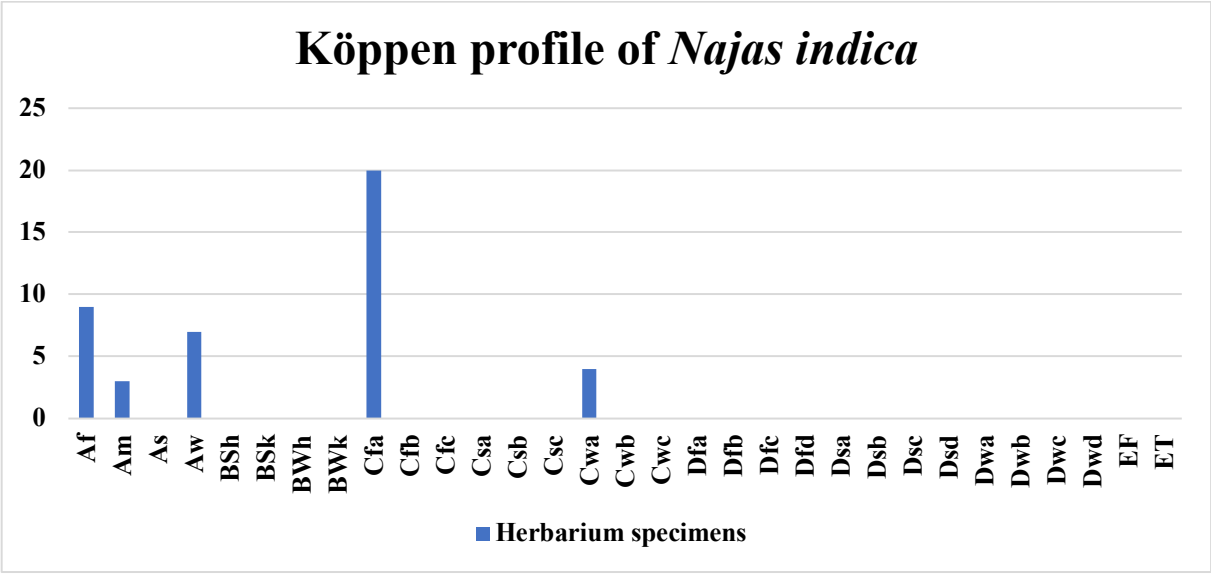

**5.3.3.1.18. Köppen profile, distribution and climate map** – GBIF occurrences of *Najas kurziana* Rendle 1899; herbarium specimens excluding duplicate occurrences (n = 1).

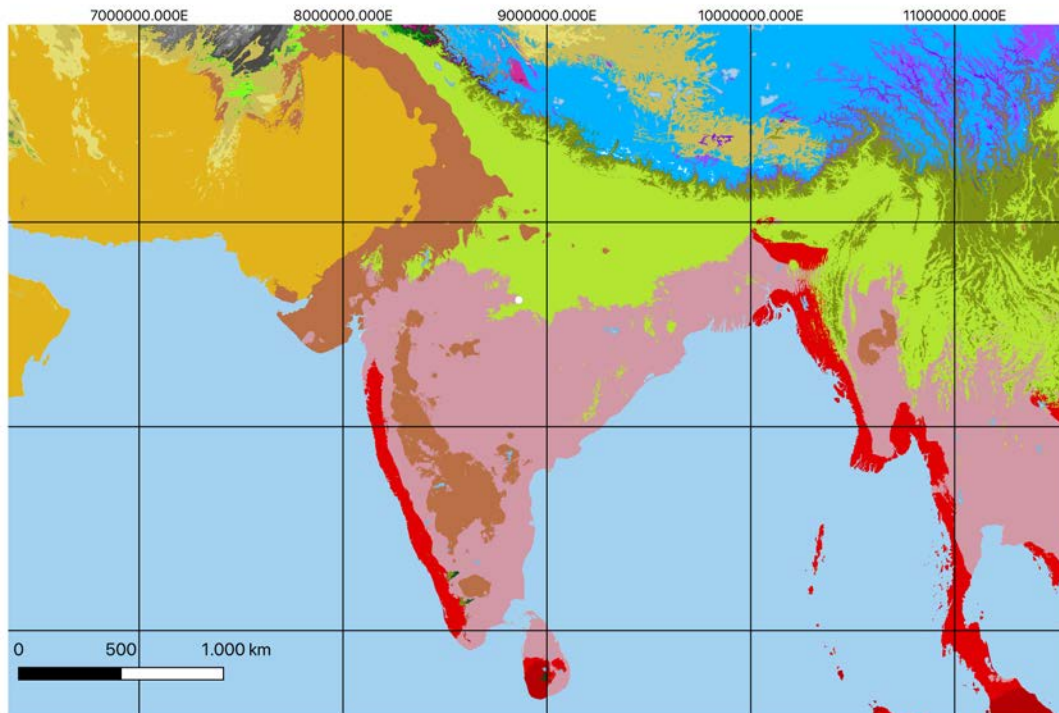

### Köppen profile of *Najas kurziana*

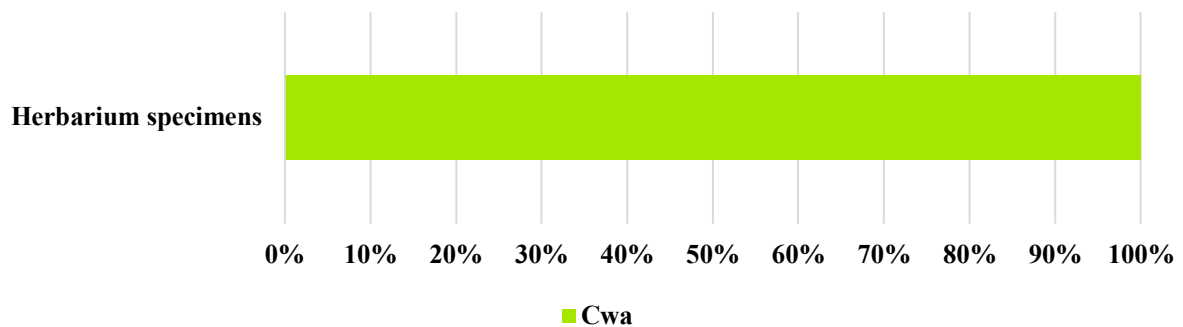

### Köppen profile of *Najas kurziana*

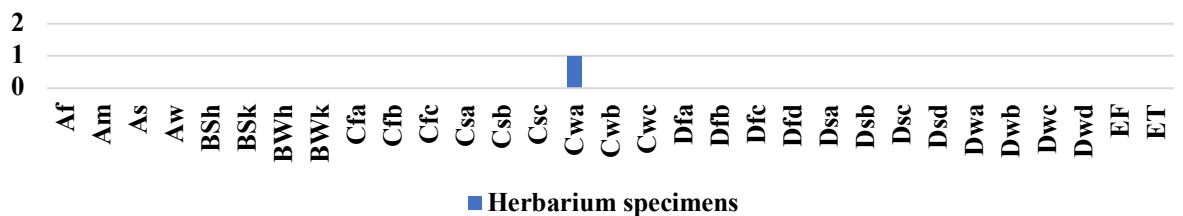

**5.3.3.1.19. Köppen profile, distribution and climate map** – GBIF occurrences of *Najas madagascariensis* Rendle 1889; herbarium specimens excluding duplicate occurrences (n = 7).

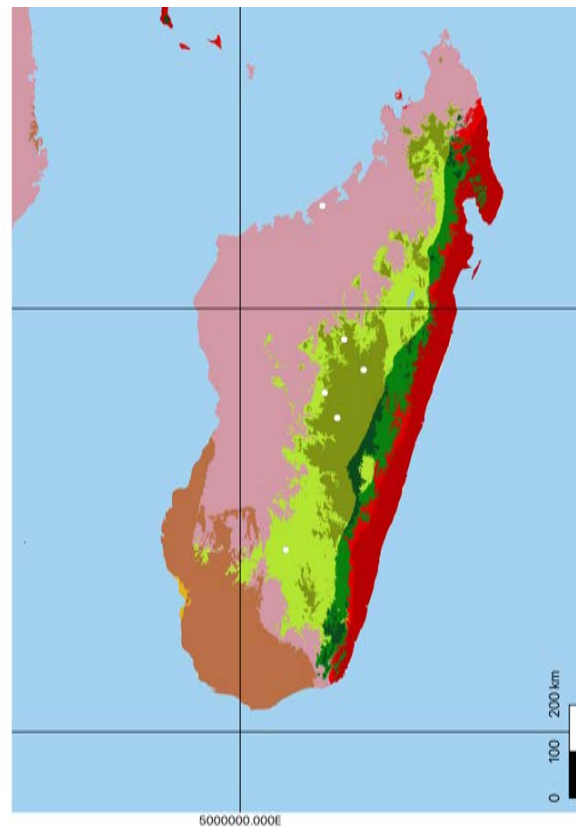

### Köppen profile of *Najas madagascariensis*

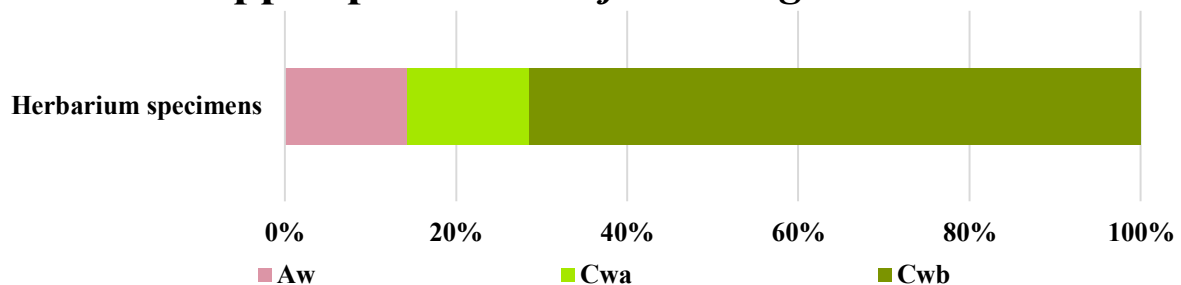

### Köppen profile of *Najas madagascariensis*

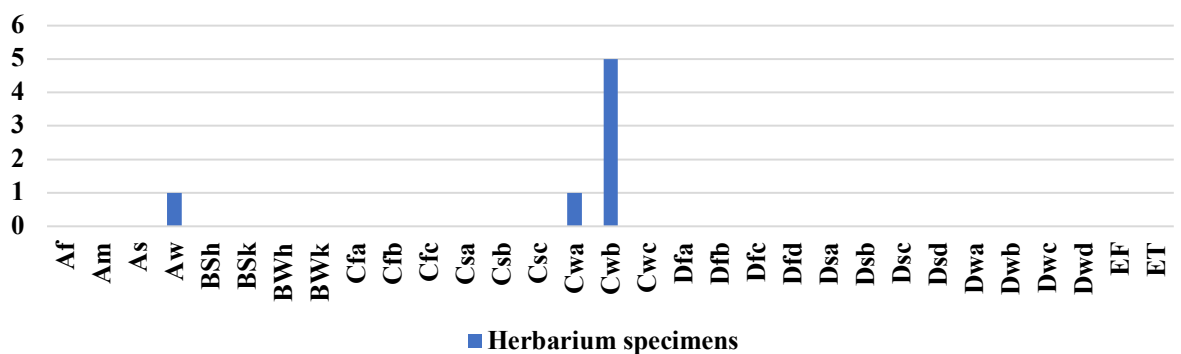

**5.3.3.1.20. Köppen profile, distribution and climate map – GBIF occurrences of *Najas malesiana* W.J.de Wilde 1968; herbarium specimens excluding duplicate occurrences (n = 47).**

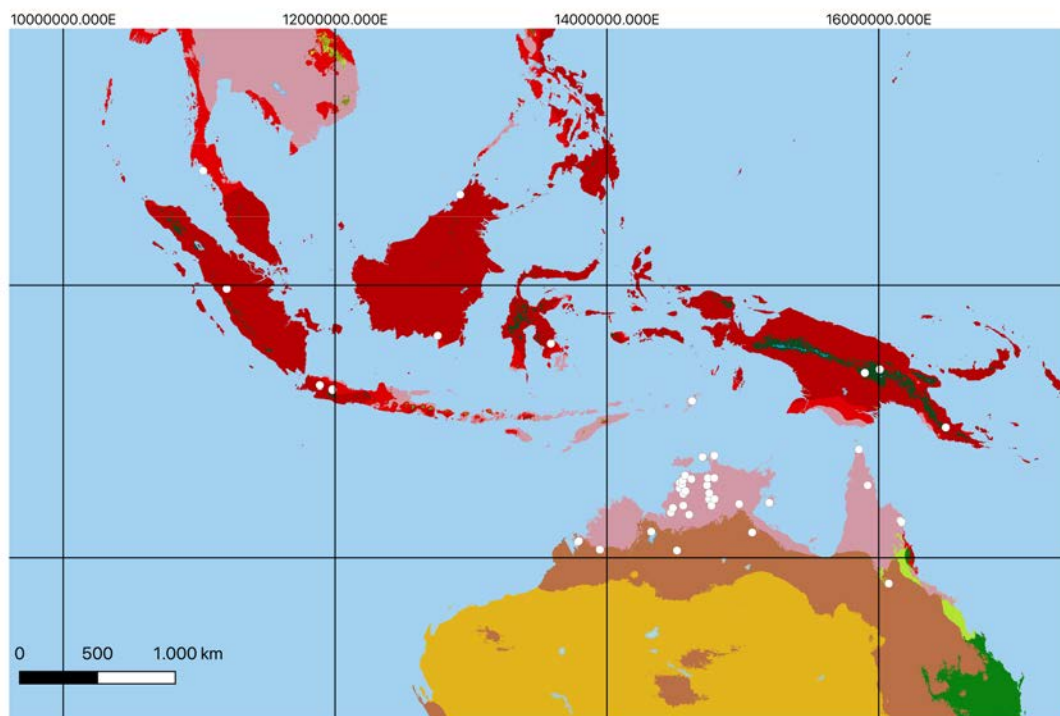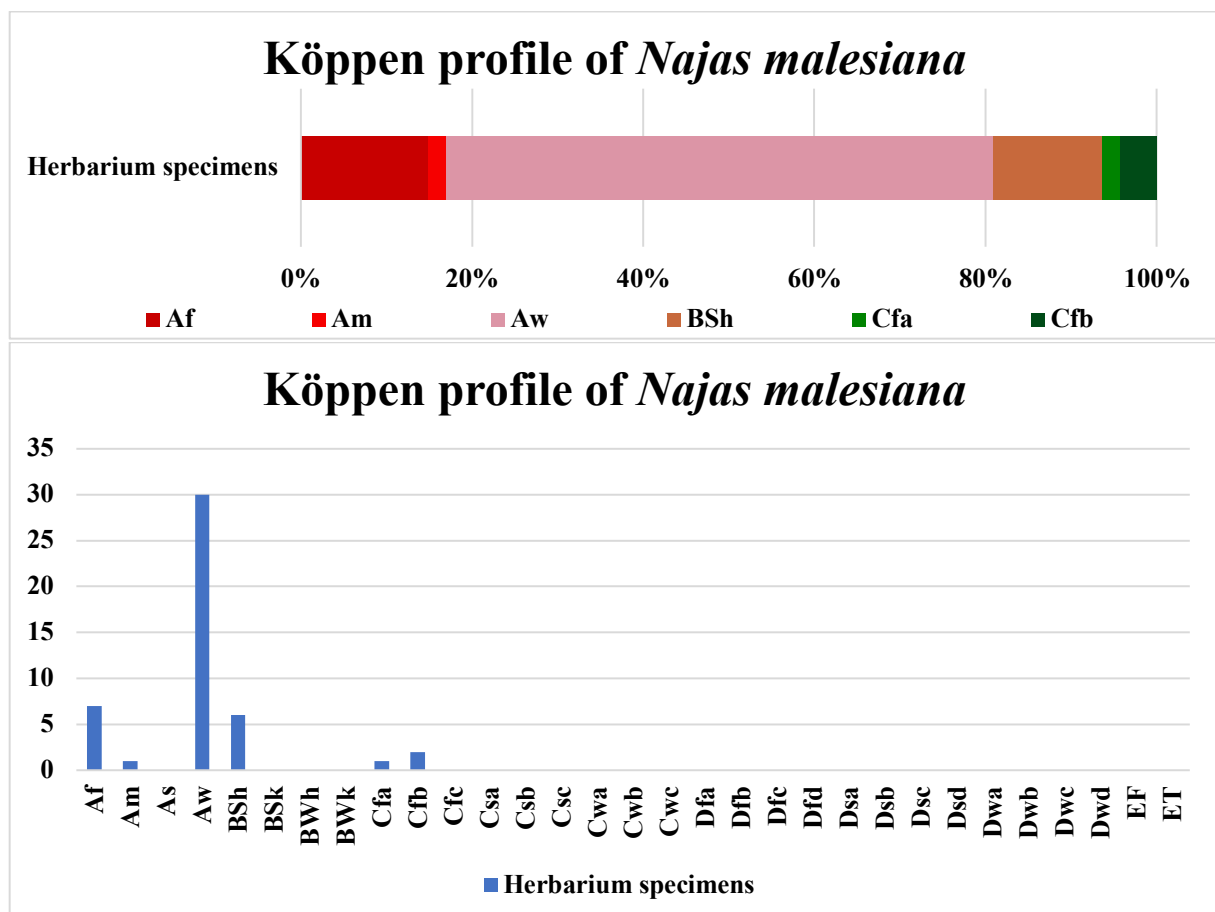

**5.3.3.1.21. Köppen profile, distribution and climate map – GBIF occurrences of *Najas marina* L. 1753; herbarium specimens excluding duplicate occurrences (n = 1441).**

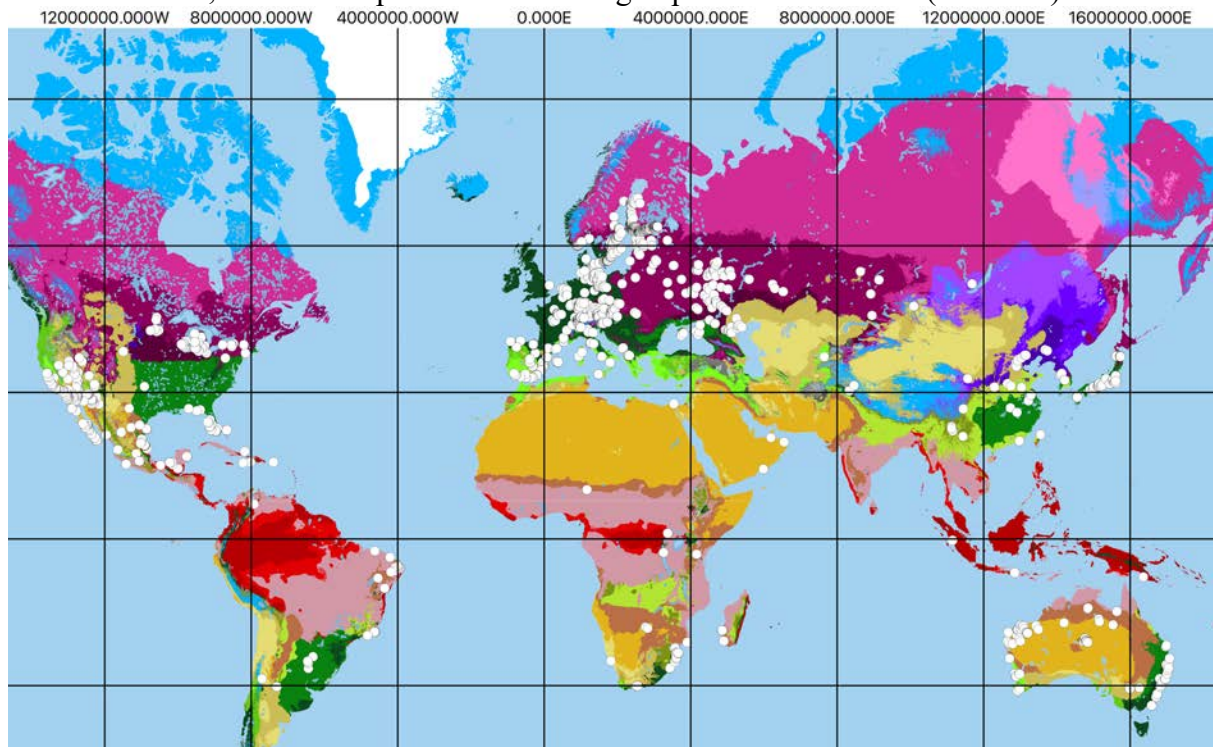

**Köppen profile of *Najas marina***

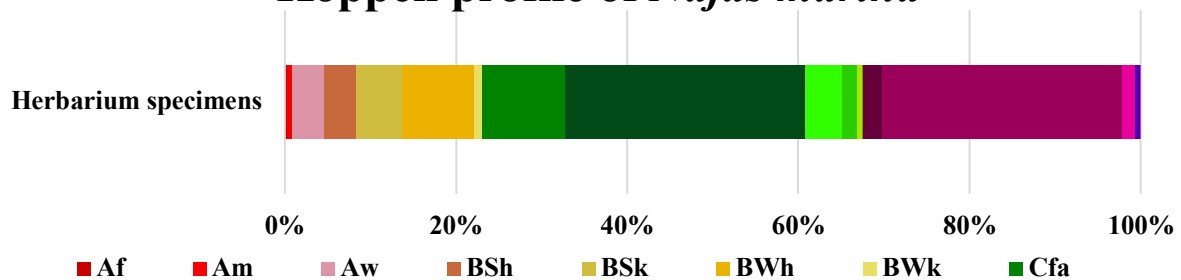

**Köppen profile of *Najas marina***

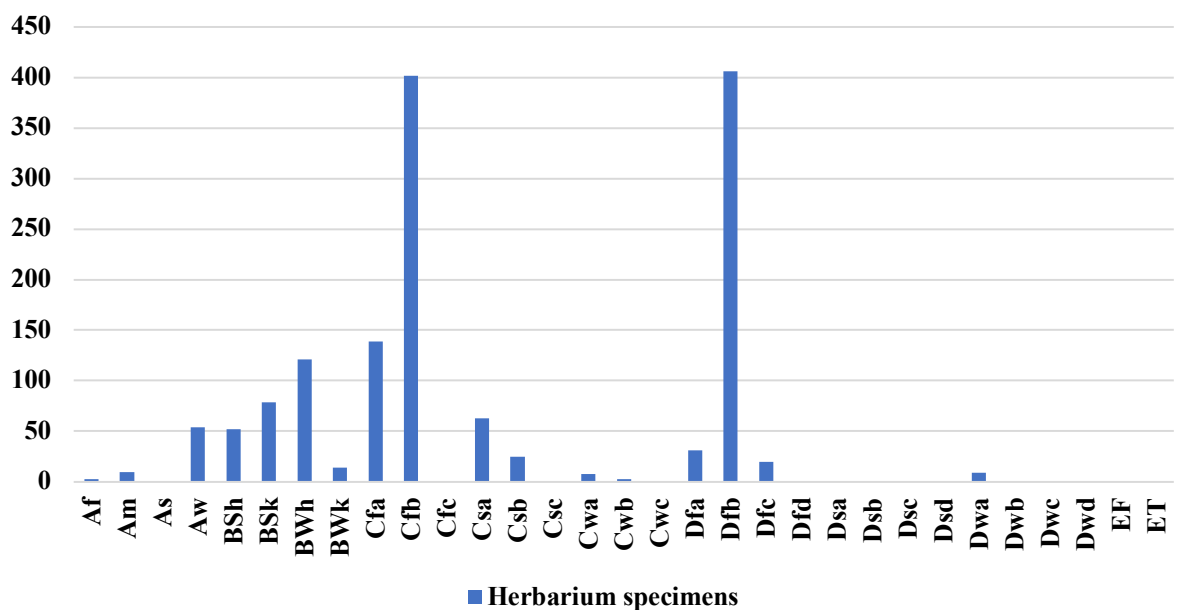

**5.3.3.1.22. Köppen profile, distribution and climate map** – GBIF occurrences of *Najas oguraensis* Miki 1935; herbarium specimens excluding duplicate occurrences (n = 31).

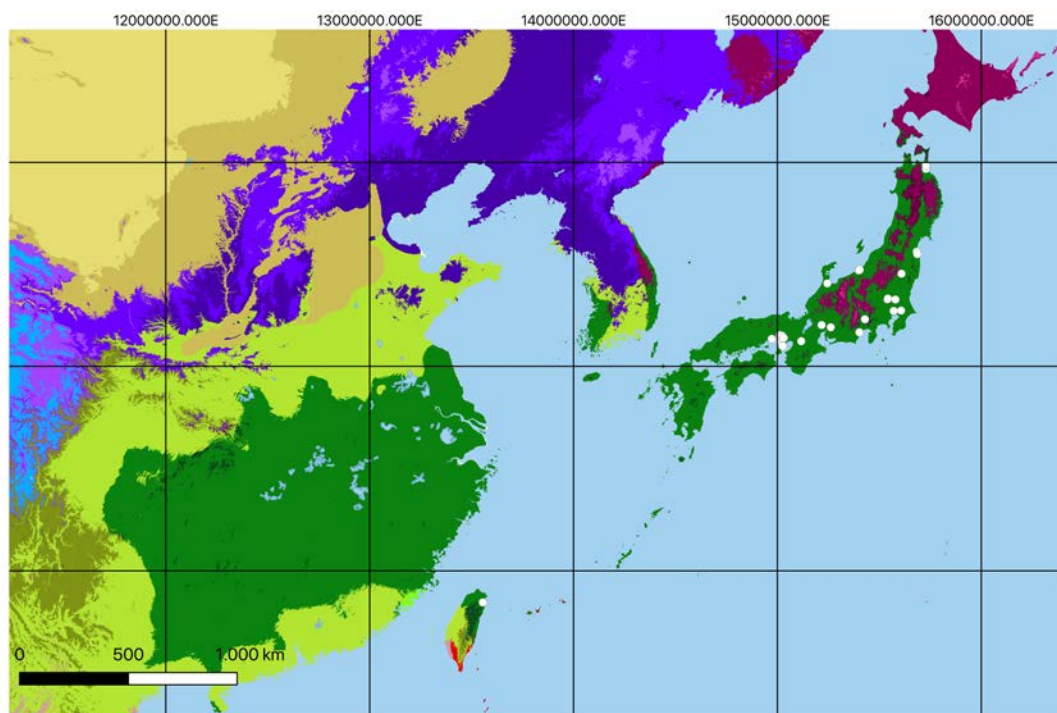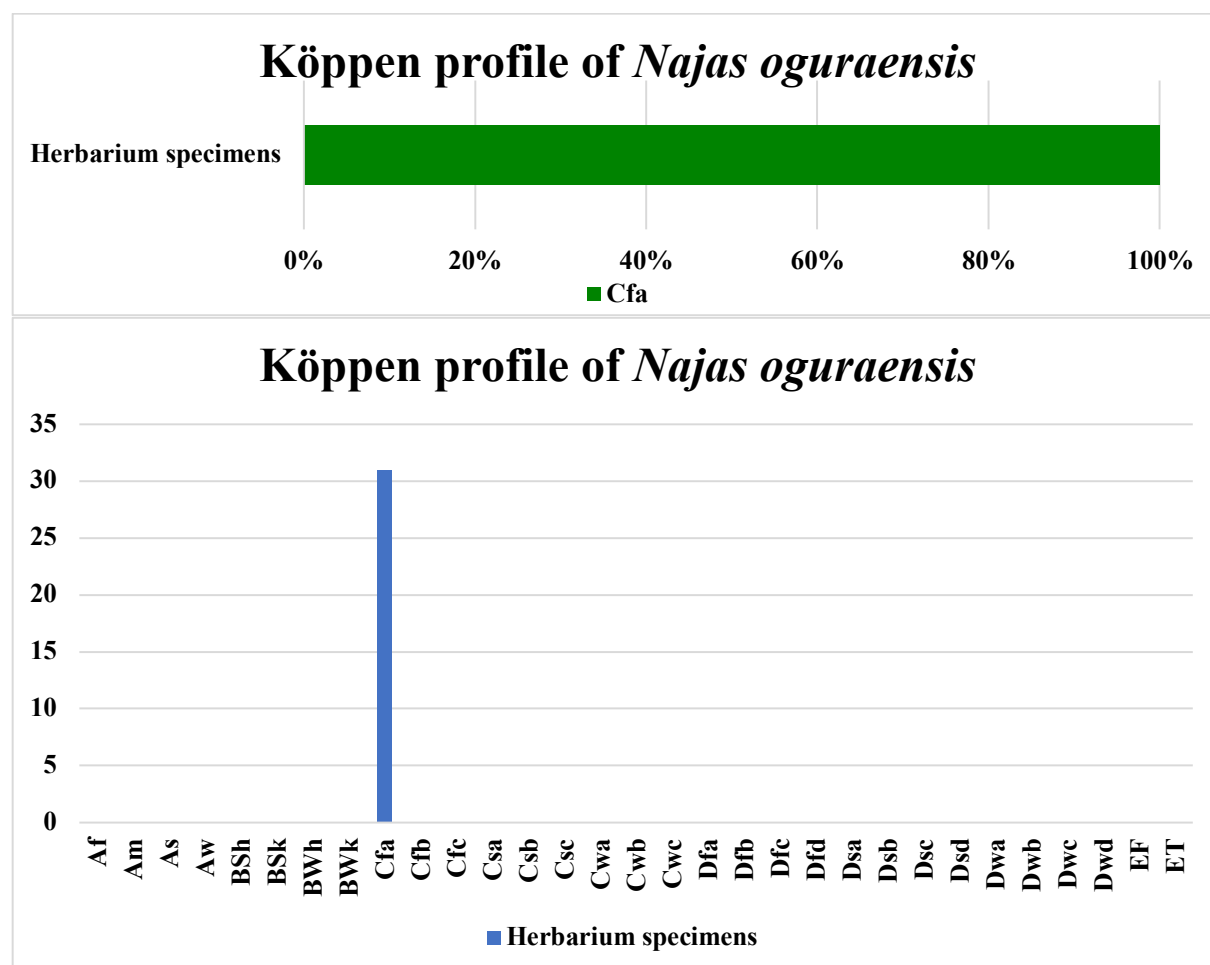

**5.3.3.1.23. Köppen profile, distribution and climate map** – GBIF occurrences of *Najas pectinate* (Parl. 1860) Magnus 1887; herbarium specimens excluding duplicate occurrences (n = 67).

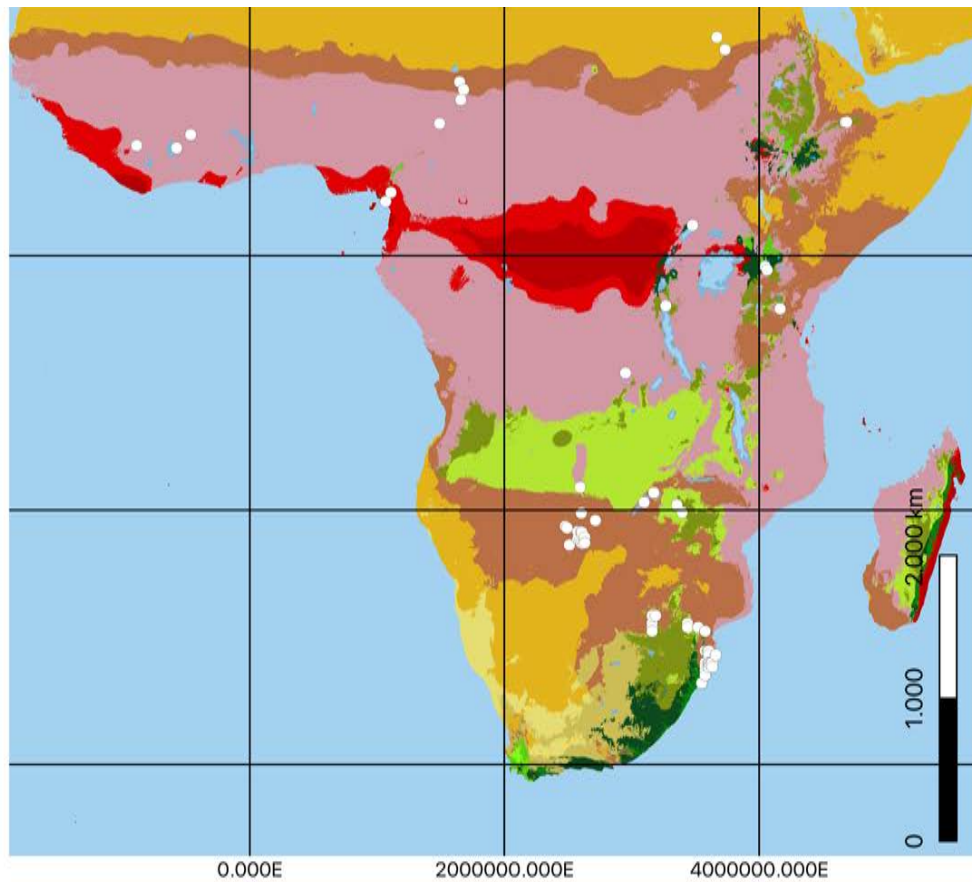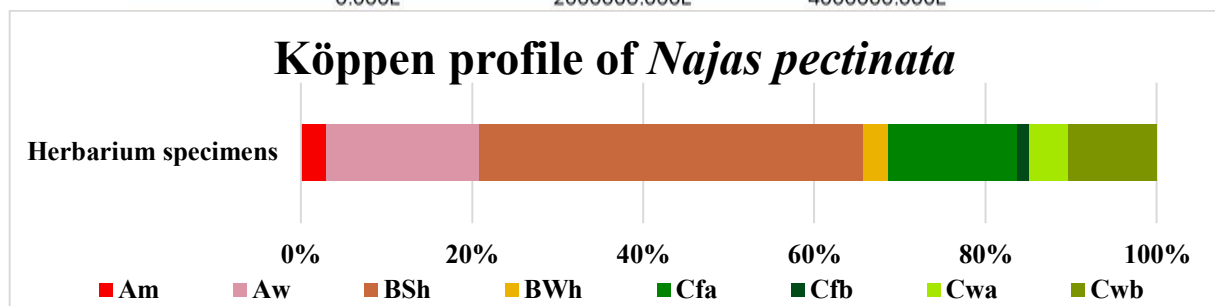

Köppen profile of *Najas pectinata*

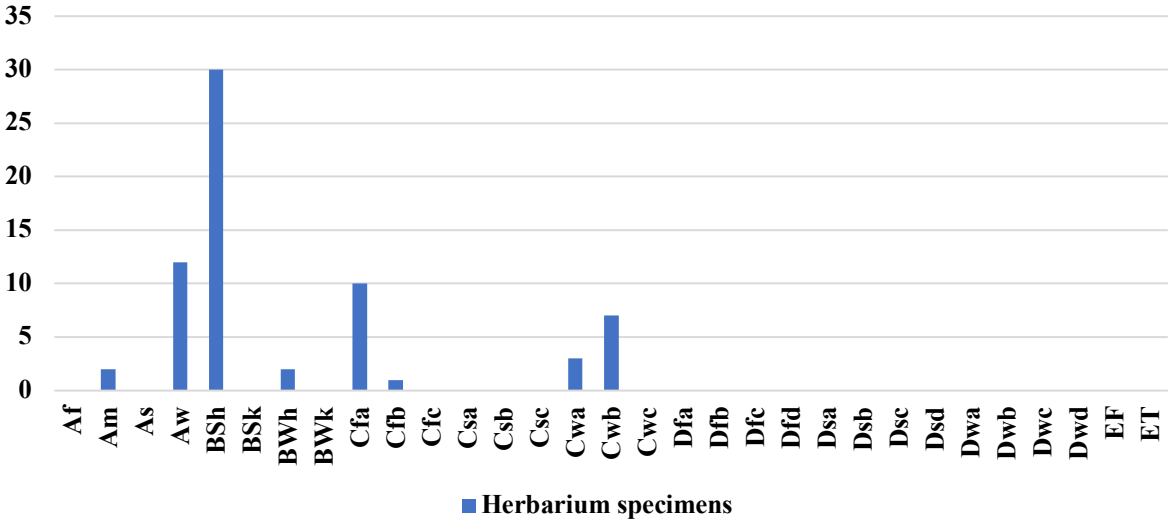

**5.3.3.1.24. Köppen profile, distribution and climate map – GBIF occurrences of *Najas schweinfurthii* Magnus 1894; herbarium specimens excluding duplicate occurrences (n = 3).**

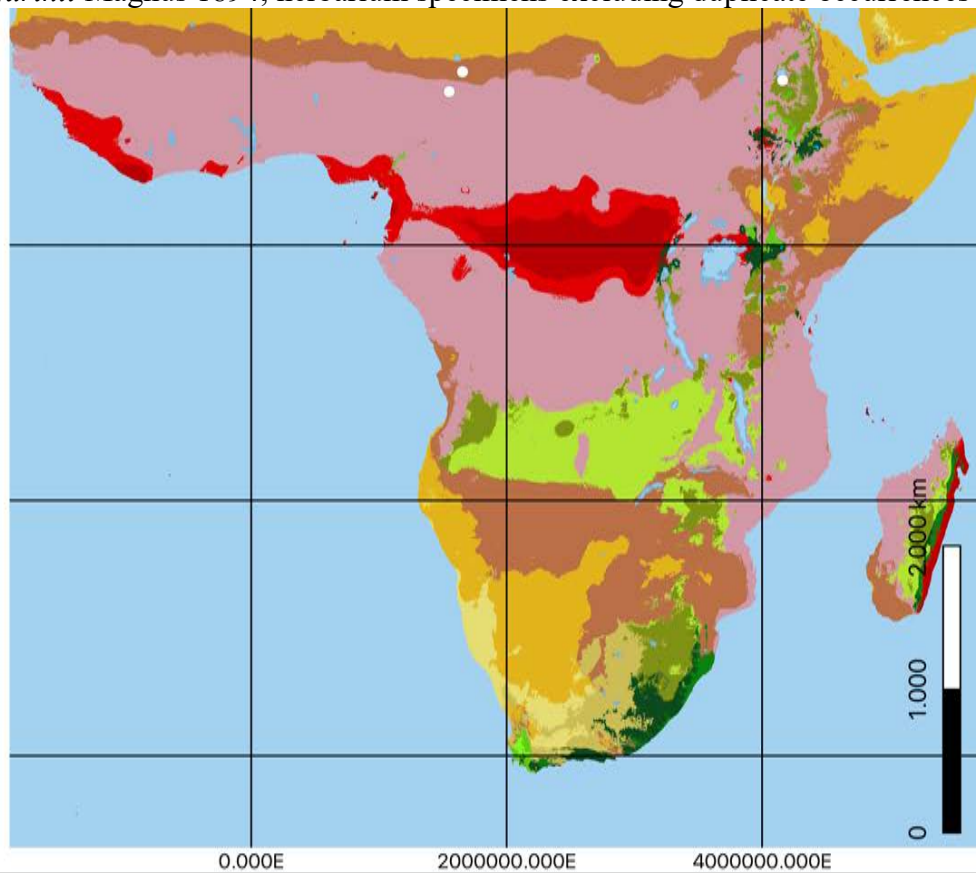

**Köppen profile of *Najas schweinfurthii***

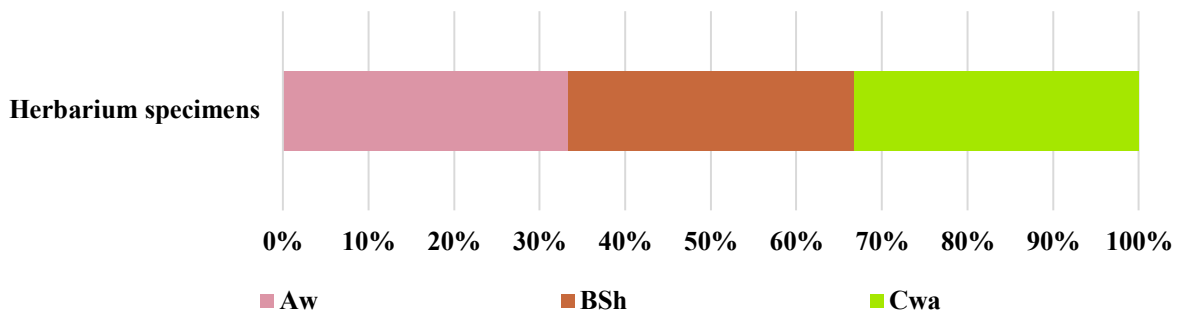

**Köppen profile of *Najas schweinfurthii***

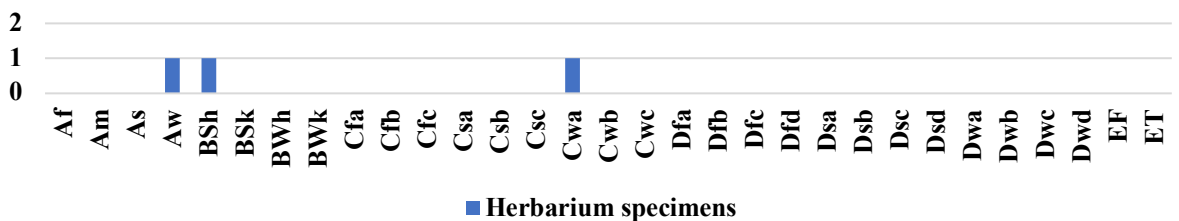

**5.3.3.1.25. Köppen profile, distribution and climate map – GBIF occurrences of *Najas tenuicaulis* Miki 1935; herbarium specimens excluding duplicate occurrences (n = 1).**

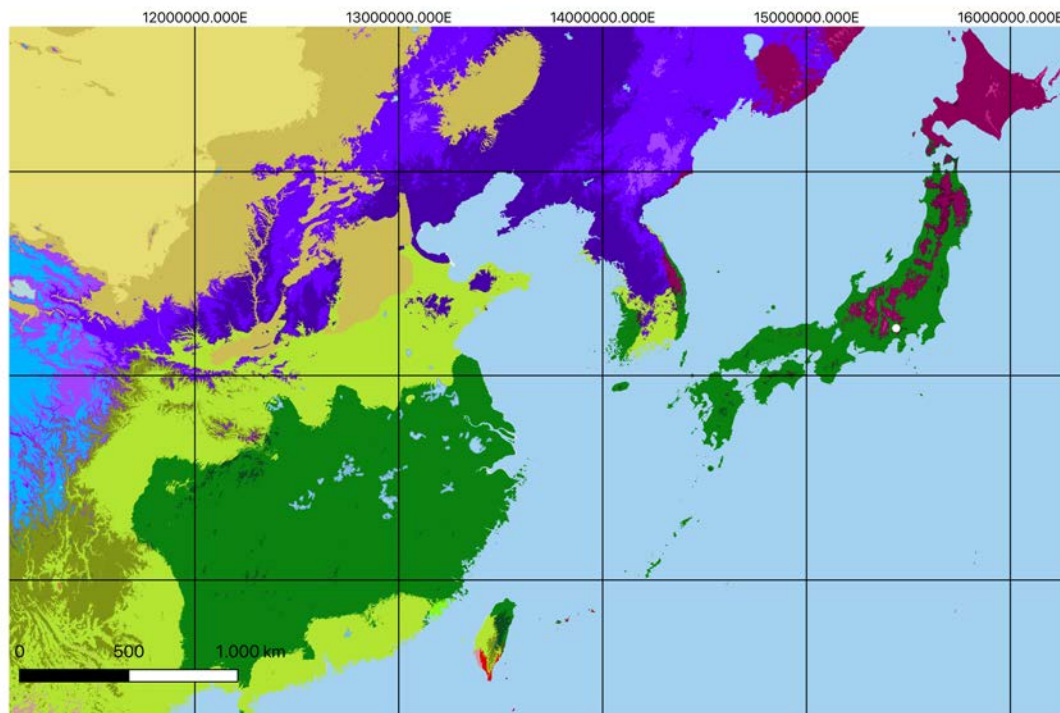

**Köppen profile of *Najas schweinfurthii***

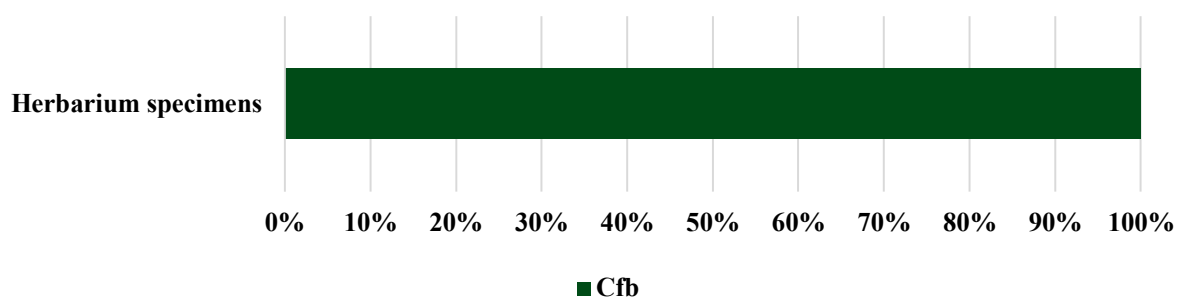

**Köppen profile of *Najas schweinfurthii***

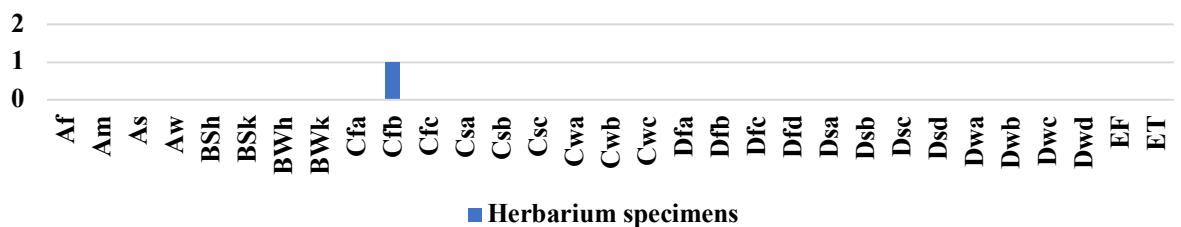

**5.3.3.1.26. Köppen profile, distribution and climate map – GBIF occurrences of *Najas tenuifolia* R.Br., 1810; herbarium specimens excluding duplicate occurrences (n = 367).**

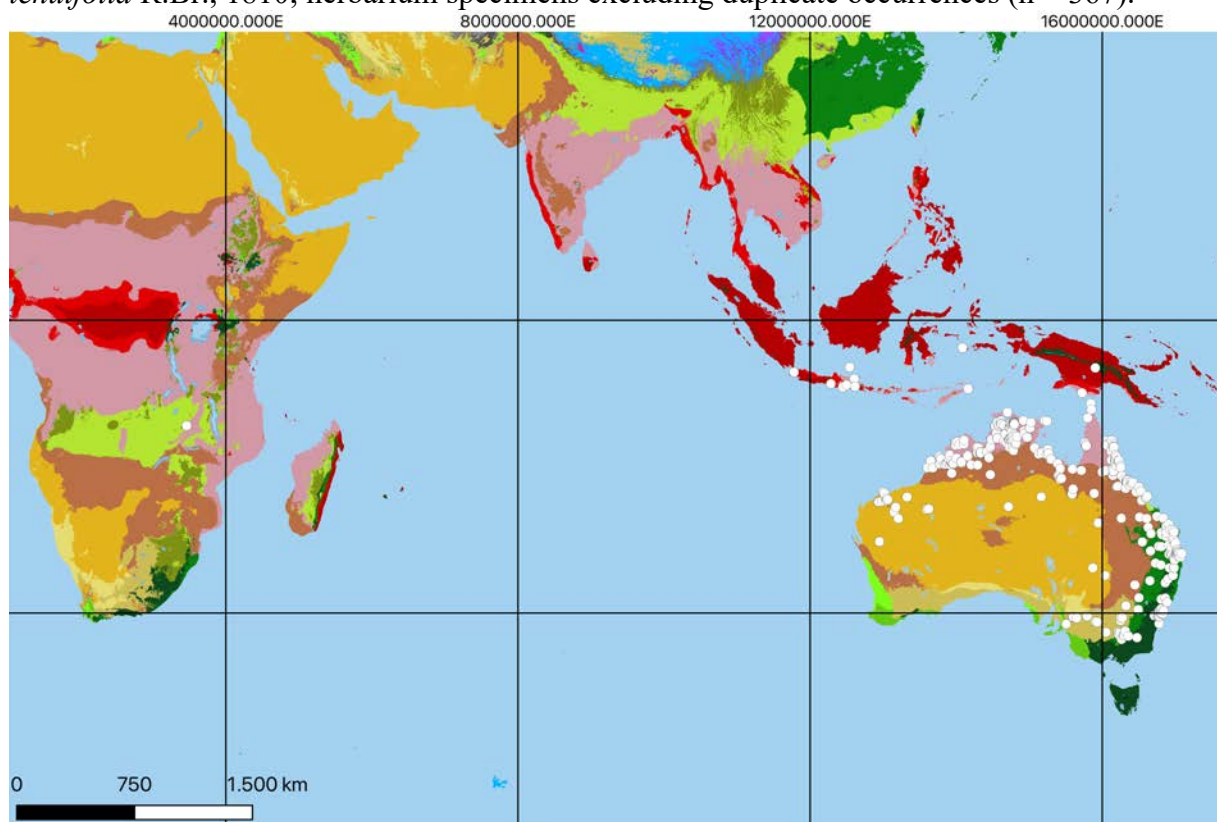

**Köppen profile of *Najas tenuifolia***

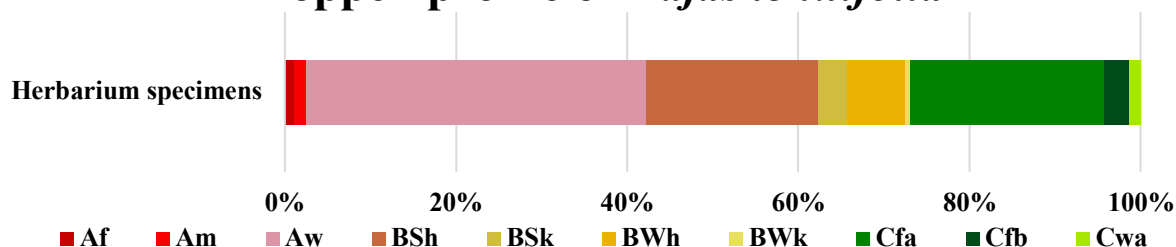

**Köppen profile of *Najas tenuifolia***

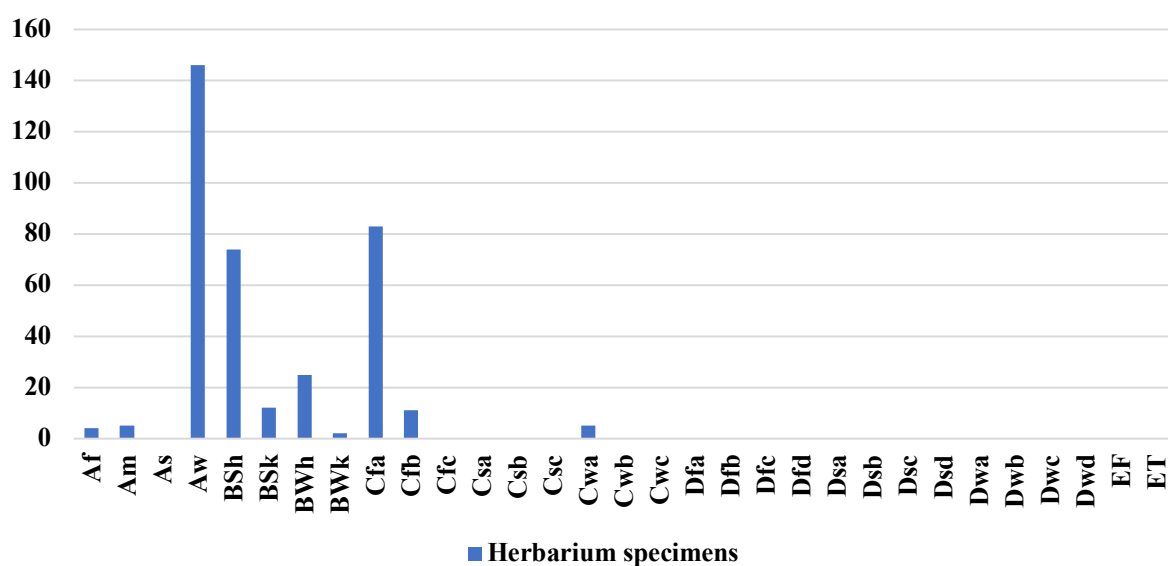

**5.3.3.1.27. Köppen profile, distribution and climate map** – GBIF occurrences of *Najas tenuissima* (A.Braun ex Magnus 1868) Magnus 1870; herbarium specimens excluding duplicate occurrences (n = 129).

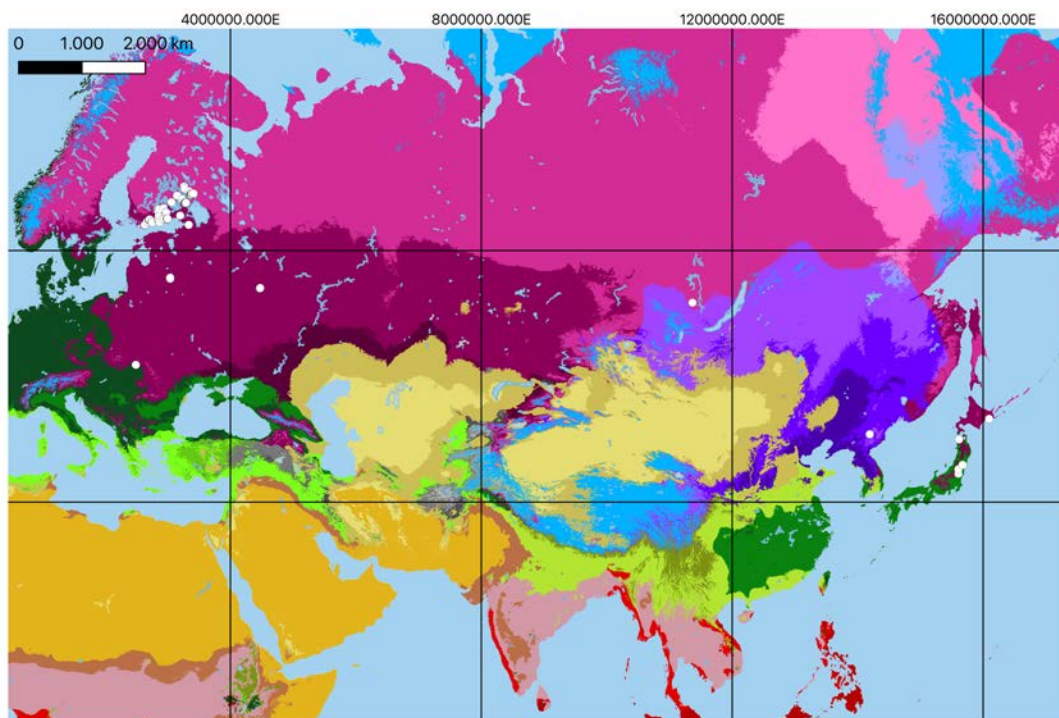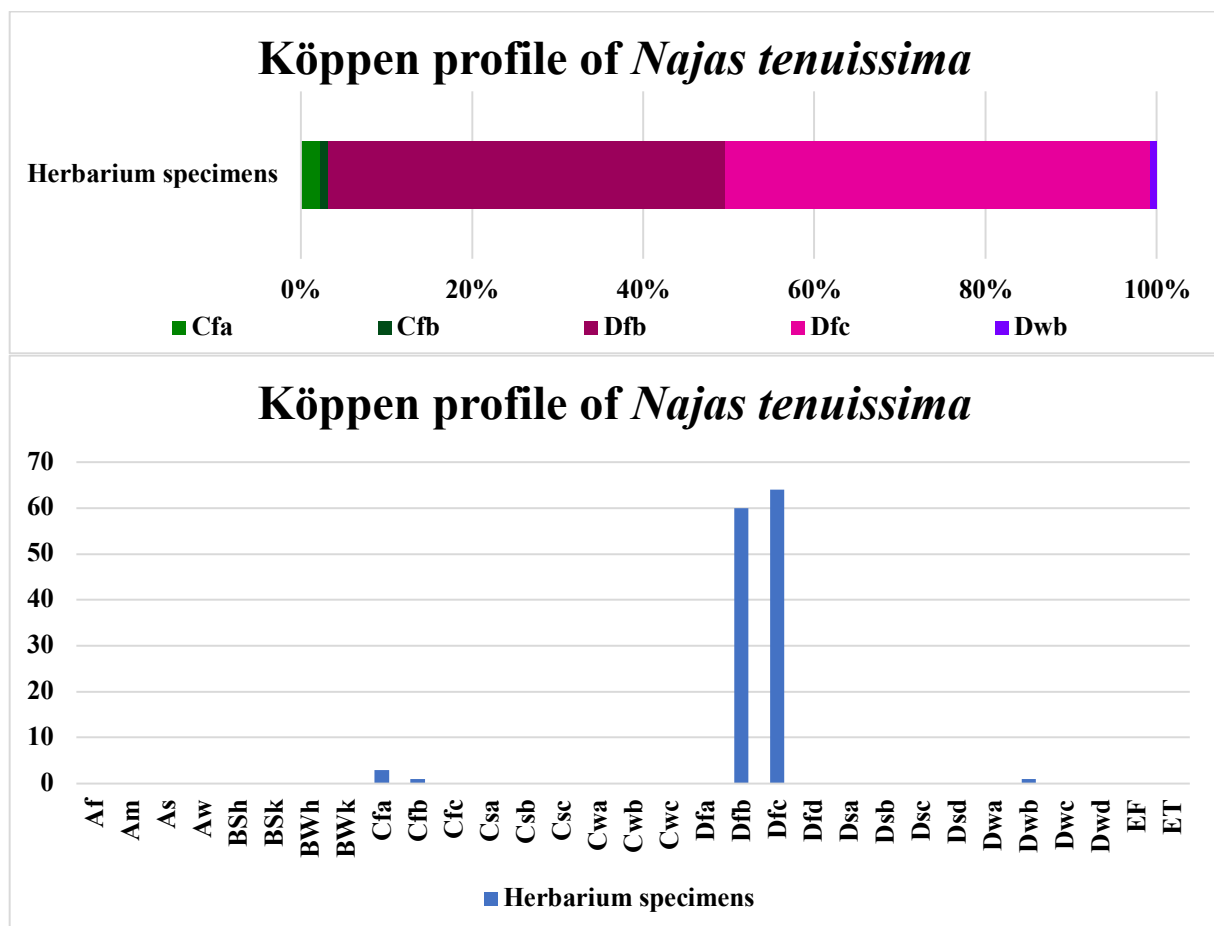

**5.3.3.1.28. Köppen profile, distribution and climate map – GBIF occurrences of *Najas testui* Rendle 1937; herbarium specimens excluding duplicate occurrences (n = 4).**

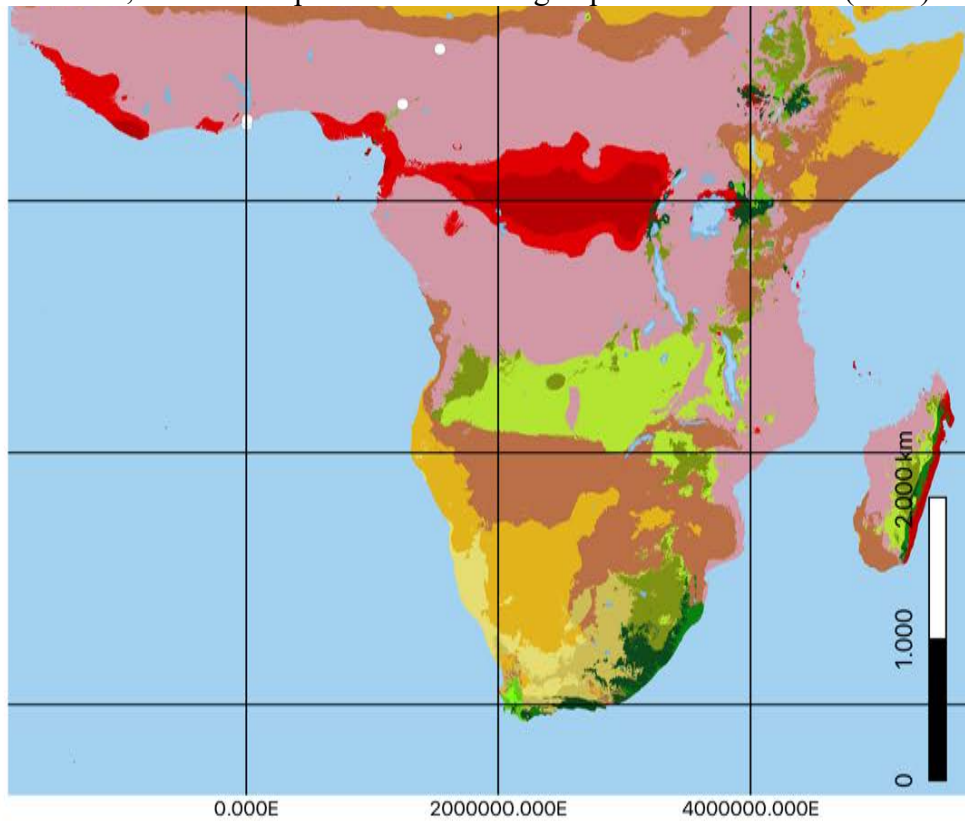

**Köppen profile of *Najas testui***

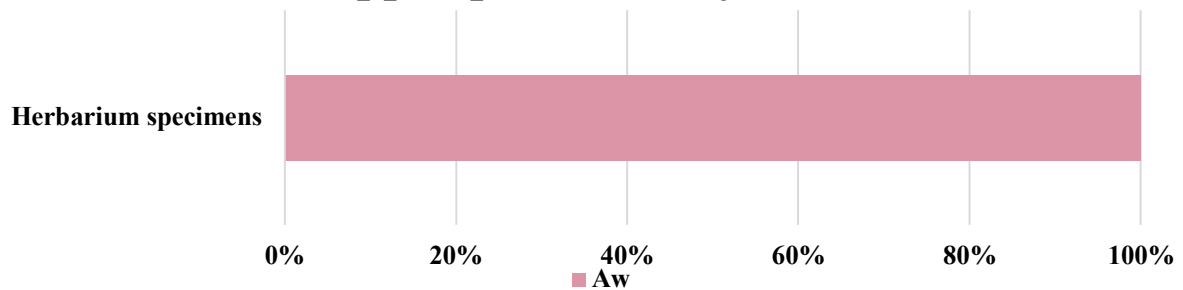

**Köppen profile of *Najas testui***

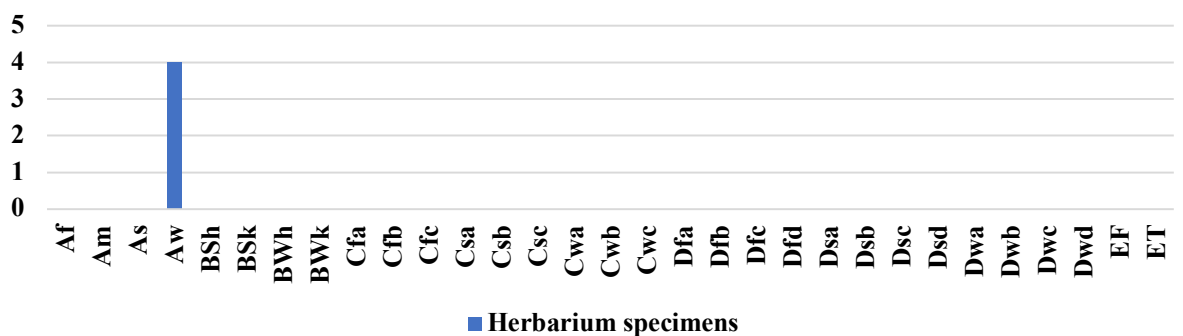

**5.3.3.1.29. Köppen profile, distribution and climate map – GBIF occurrences of *Najas welwitschia* Rendle 1899; herbarium specimens excluding duplicate occurrences (n = 7).**

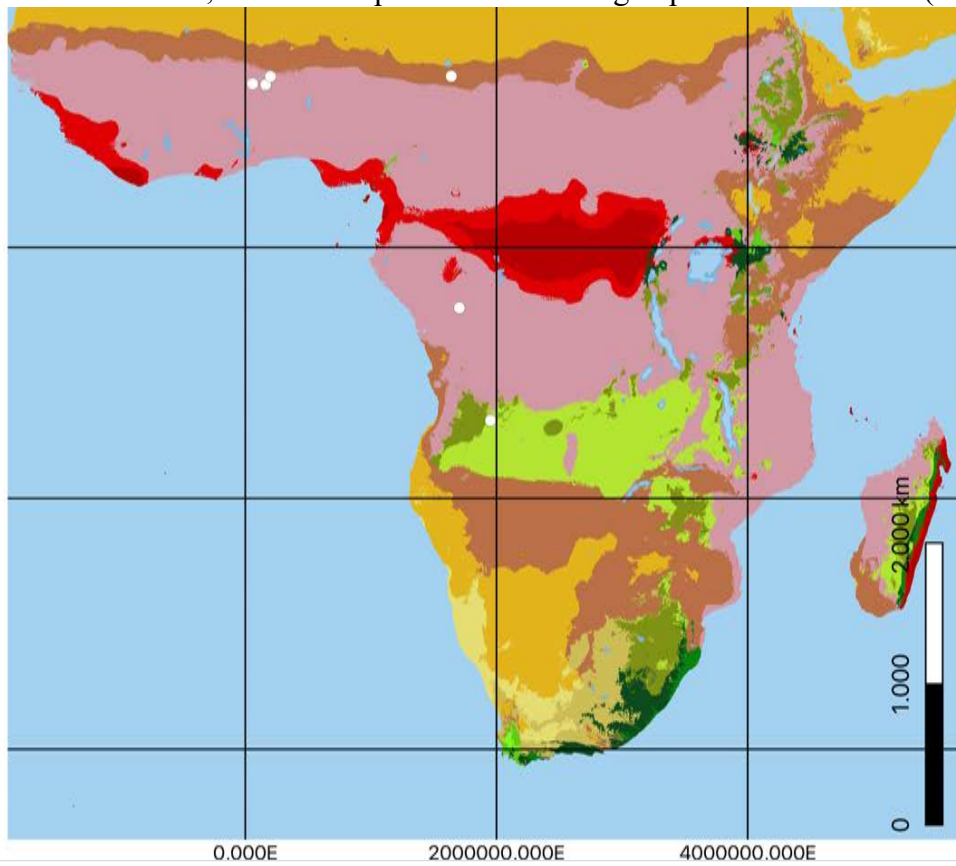

**Köppen profile of *Najas welwitschii***

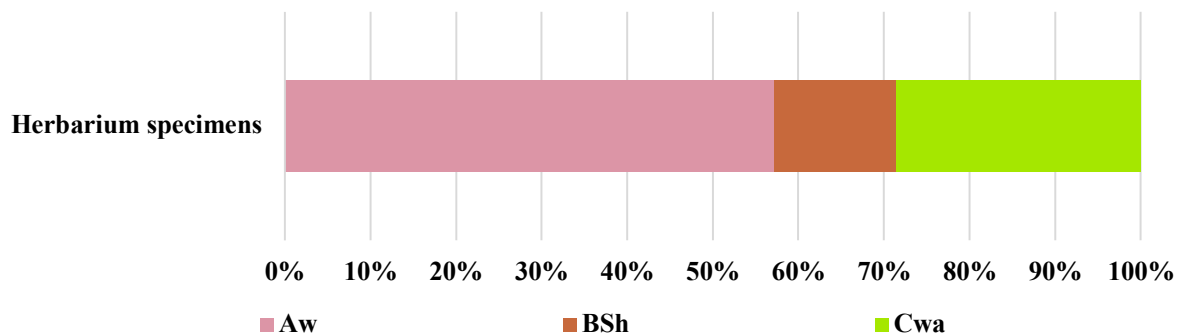

**Köppen profile of *Najas welwitschii***

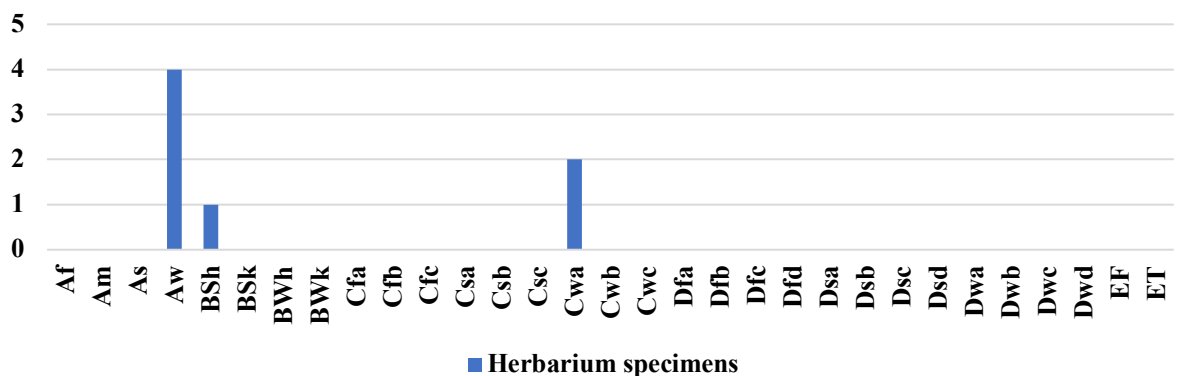

**5.3.3.1.30. Köppen profile, distribution and climate map – GBIF occurrences of *Najas wrightiana* A.Braun 1868; herbarium specimens excluding duplicate occurrences (n = 55).**

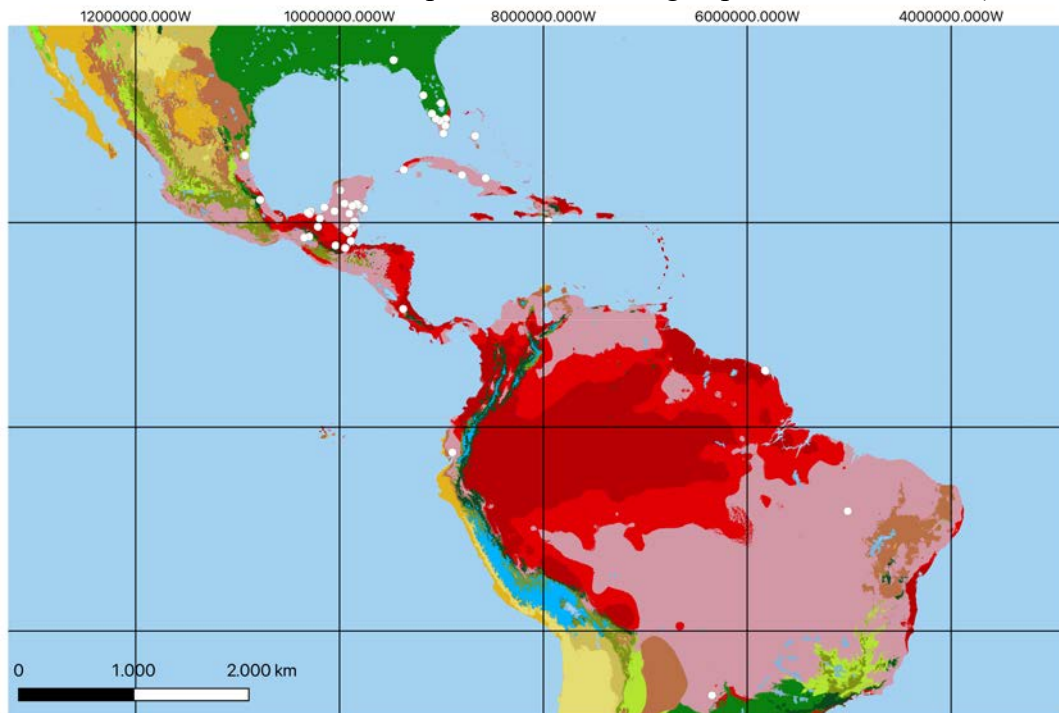

**Köppen profile of *Najas wrightiana***

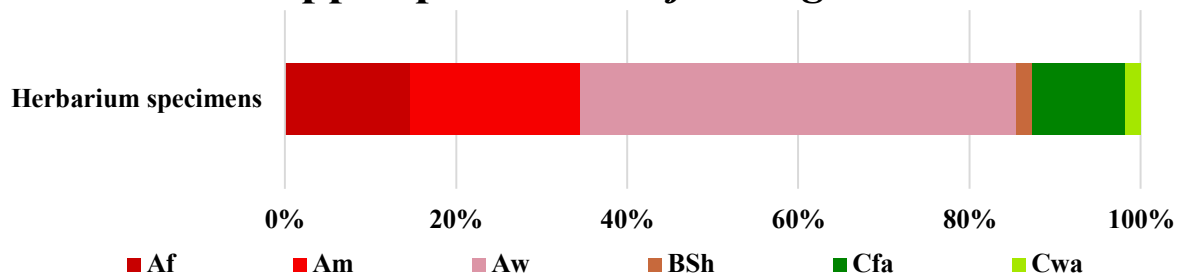

**Köppen profile of *Najas wrightiana***

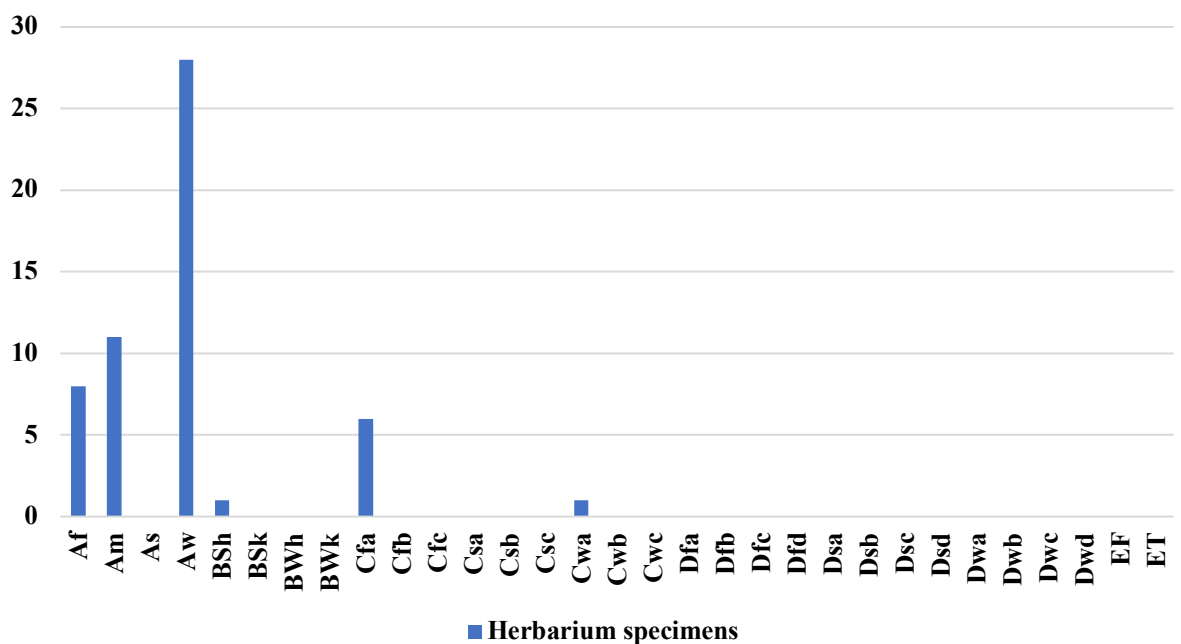

**5.3.4. Crown group Clade A of Hydrocharitaceae** cf. Chen et. al (2012), comprising *Hydrilla* Rich. 1811, *Nechamandra* Planch. 1849, and *Vallisneria* P.Micheli ex L. 1753

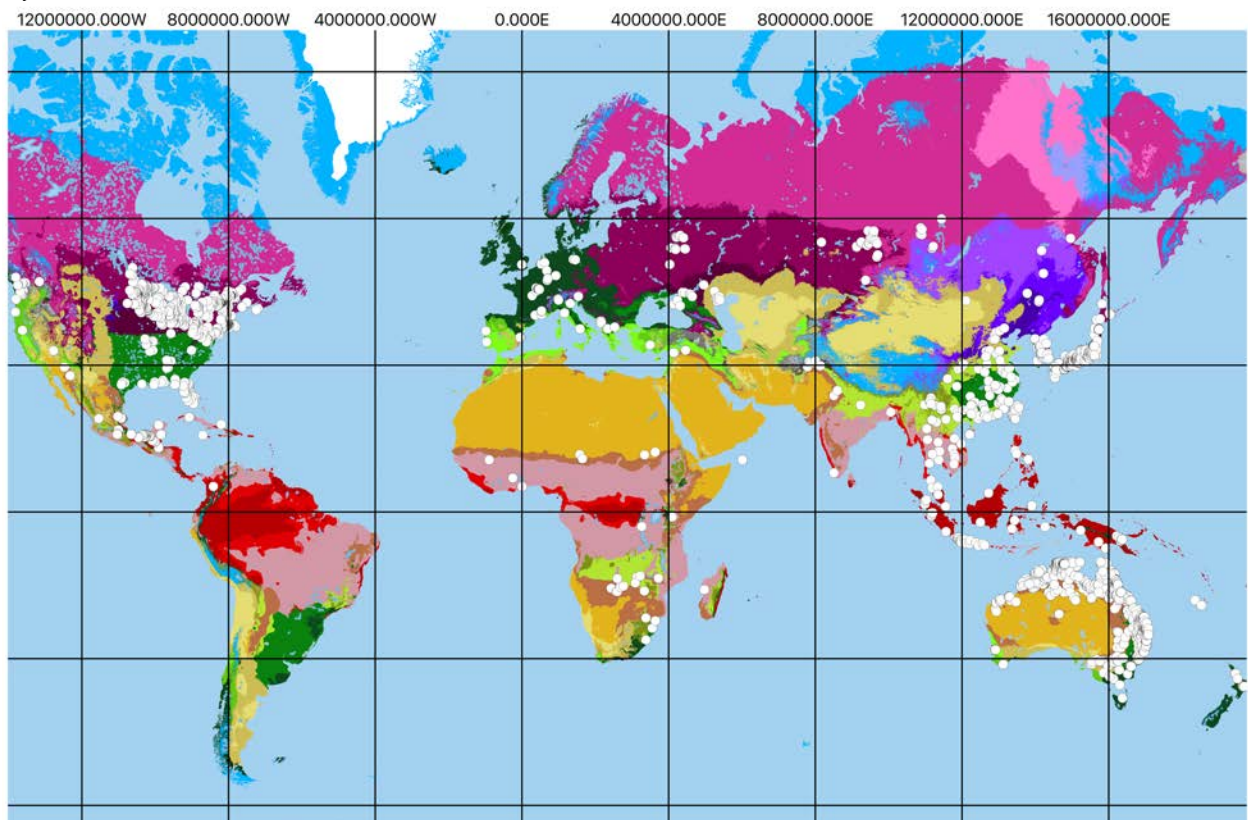

### 5.3.4.1. Genus *Hydrilla* Rich. 1811

5.3.4.1.1. Köppen profile, distribution and climate map – GBIF occurrences of *Hydrilla verticillate* (L.f 1782) Royle 1839; herbarium specimens excluding duplicate occurrences (n = 762).

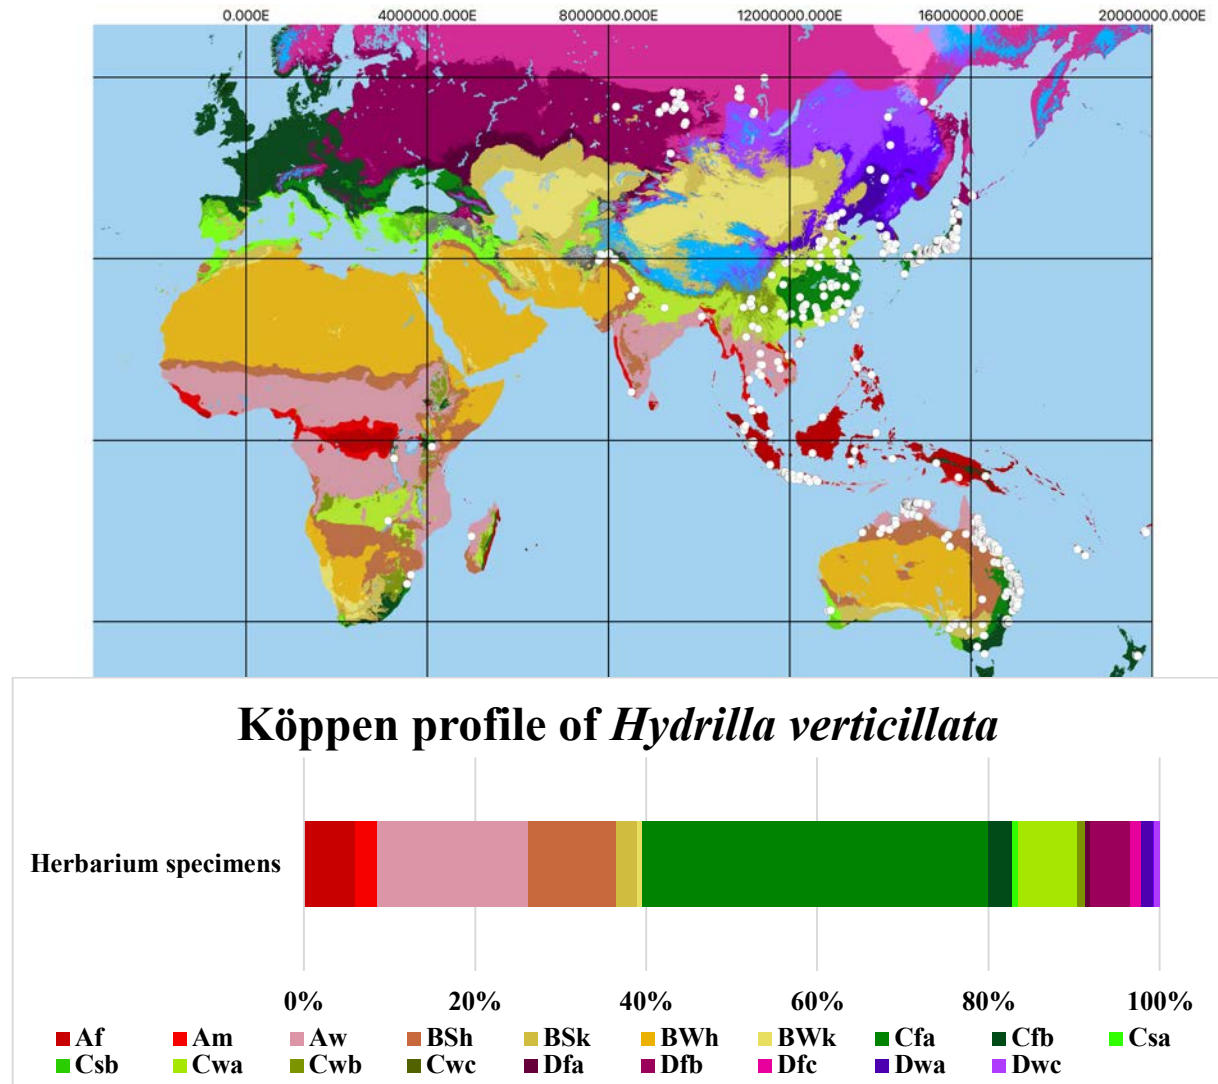

## Köppen profile of *Hydrilla verticillata*

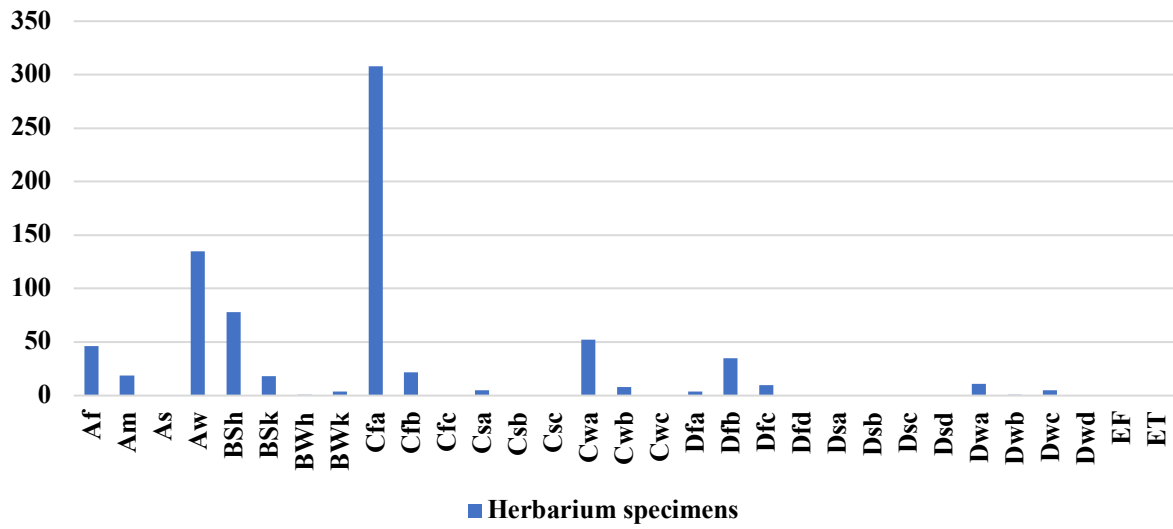

### 5.3.4.2. Genus *Nechamandra* Planch. 1849.

**5.3.4.2.1. Köppen profile, distribution and climate map** – GBIF occurrences of *Nechamandra alternifolia* Thwaites, 1864; herbarium specimens excluding duplicate occurrences (n = 12).

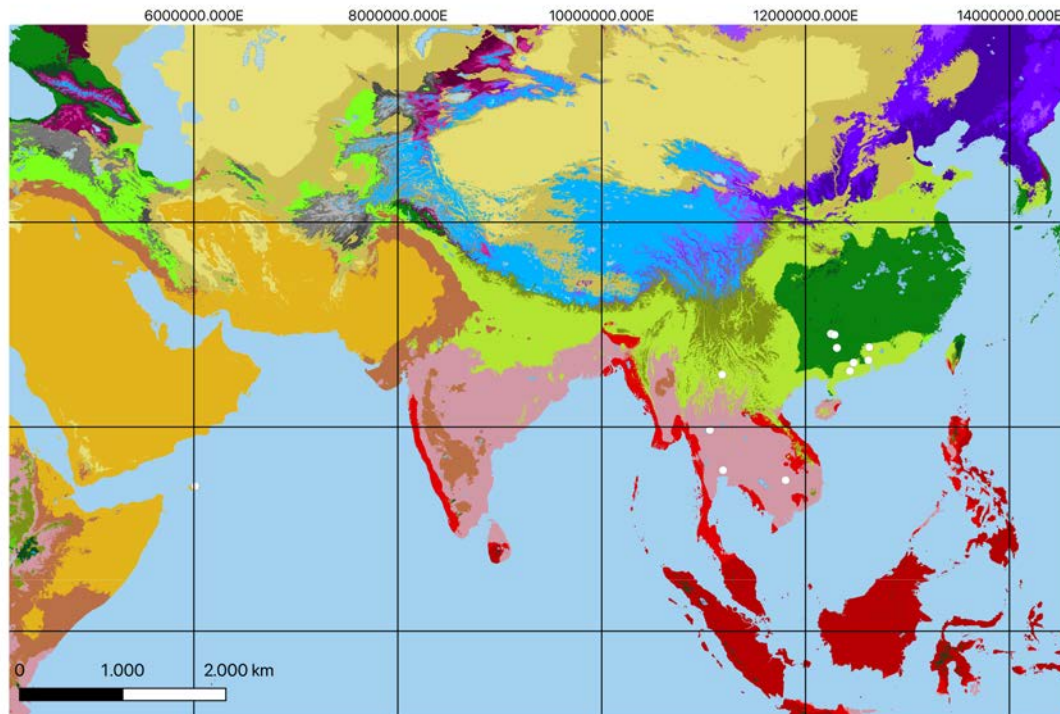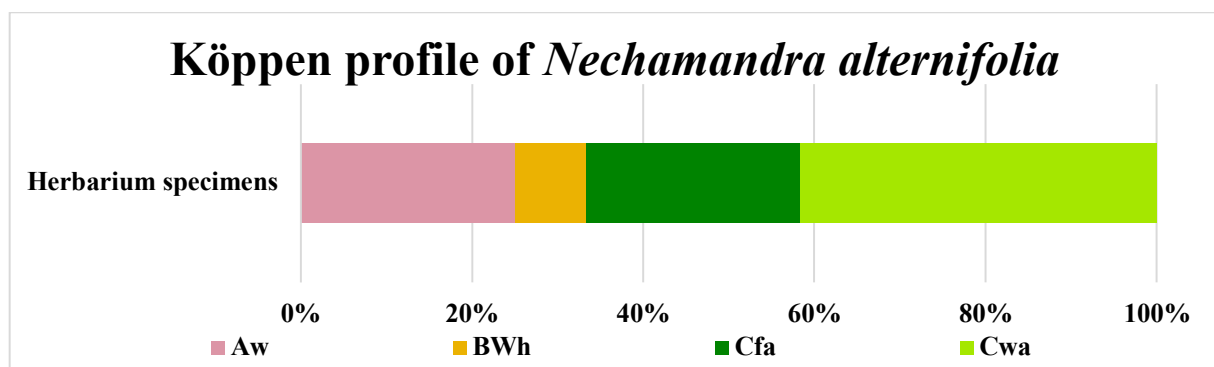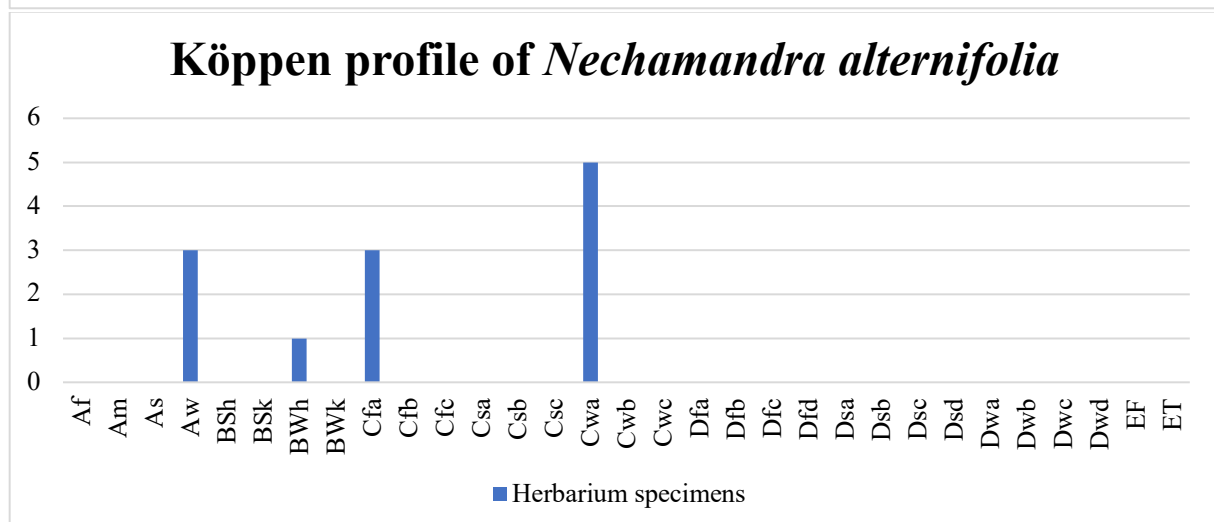

**Distribution and Köppen profiles of genus *Vallisneria*, incl. *V. americana*, *V. annua*, *V. caulescens*, *V. denseserrulata*, *V. erecta*, *V. nana*, *V. natans*, *V. rubra*, *V. spiralis*, *V. spinulosa*, and *V. triptera*. (n = 2698).**

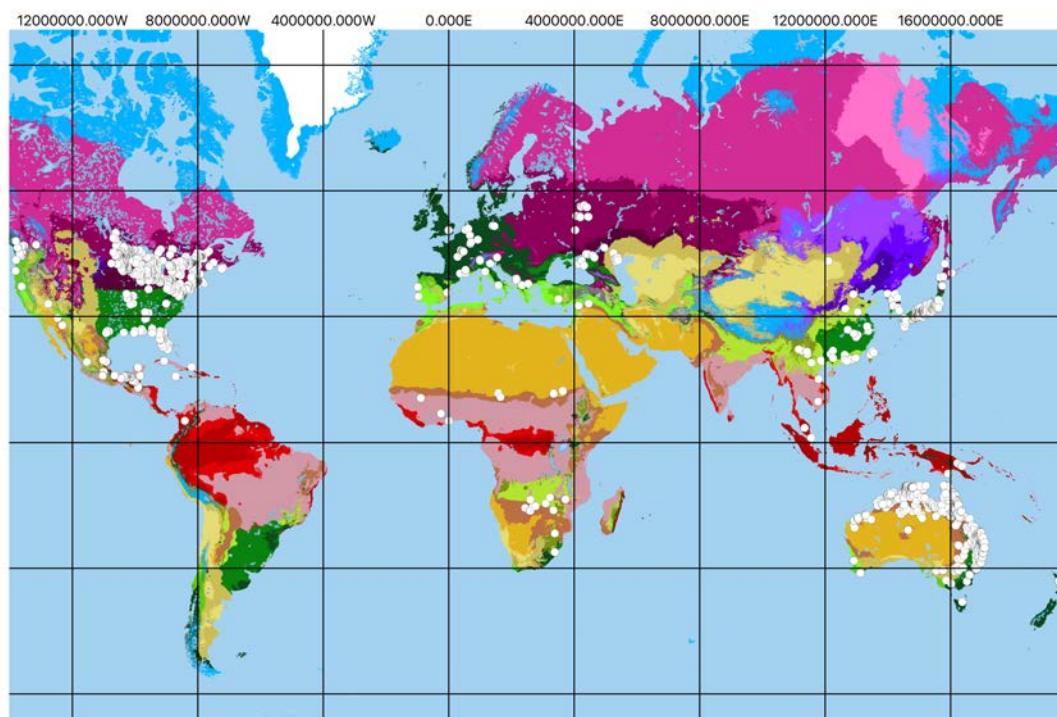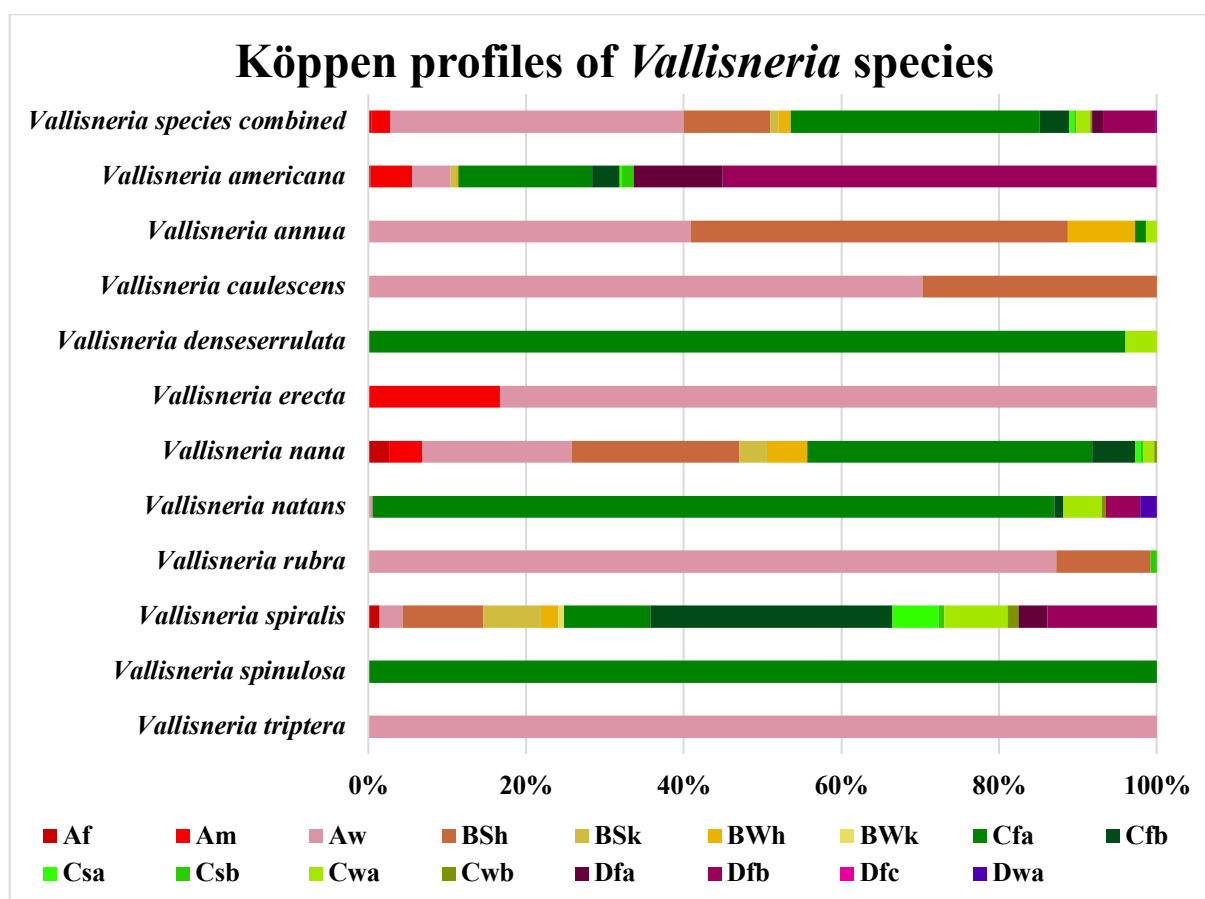

**5.3.4.3.1. Köppen profile, distribution and climate map** – GBIF occurrences of *Vallisneria americana* Michx. 1803; herbarium specimens excluding duplicate occurrences (n = 719).

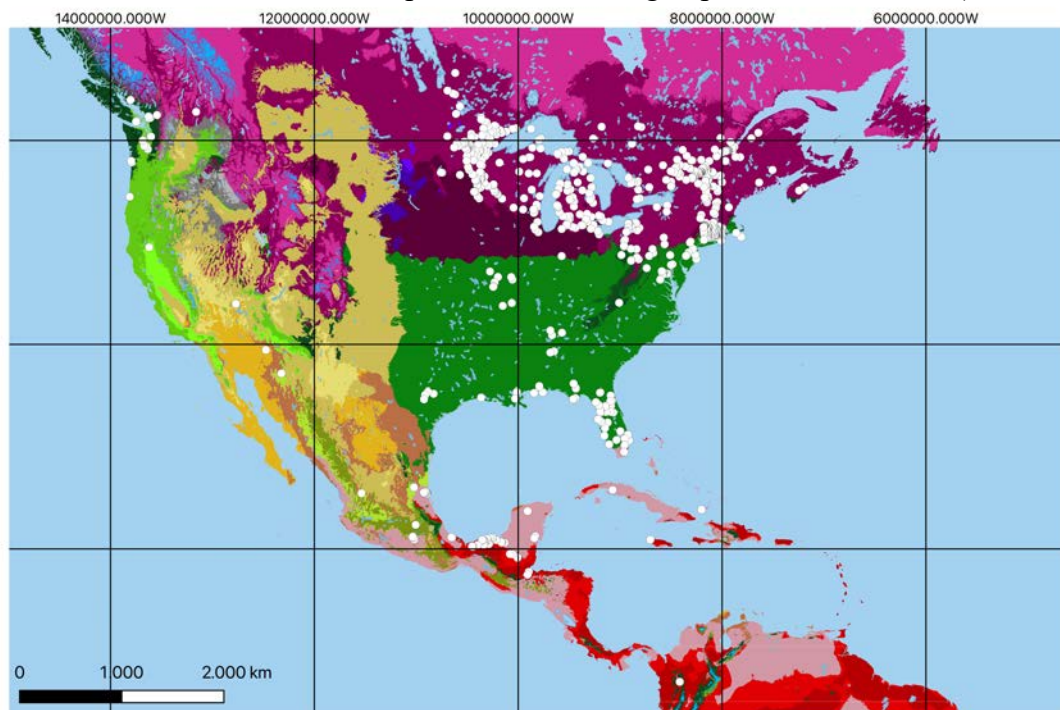

**Köppen profile of *Vallisneria americana***

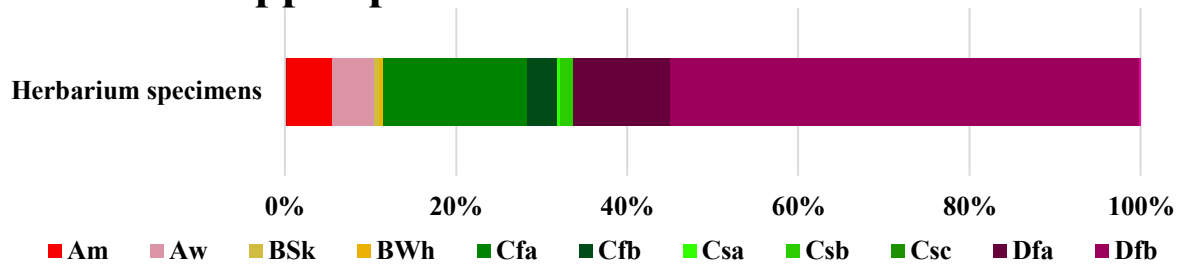

**Köppen profile of *Vallisneria americana***

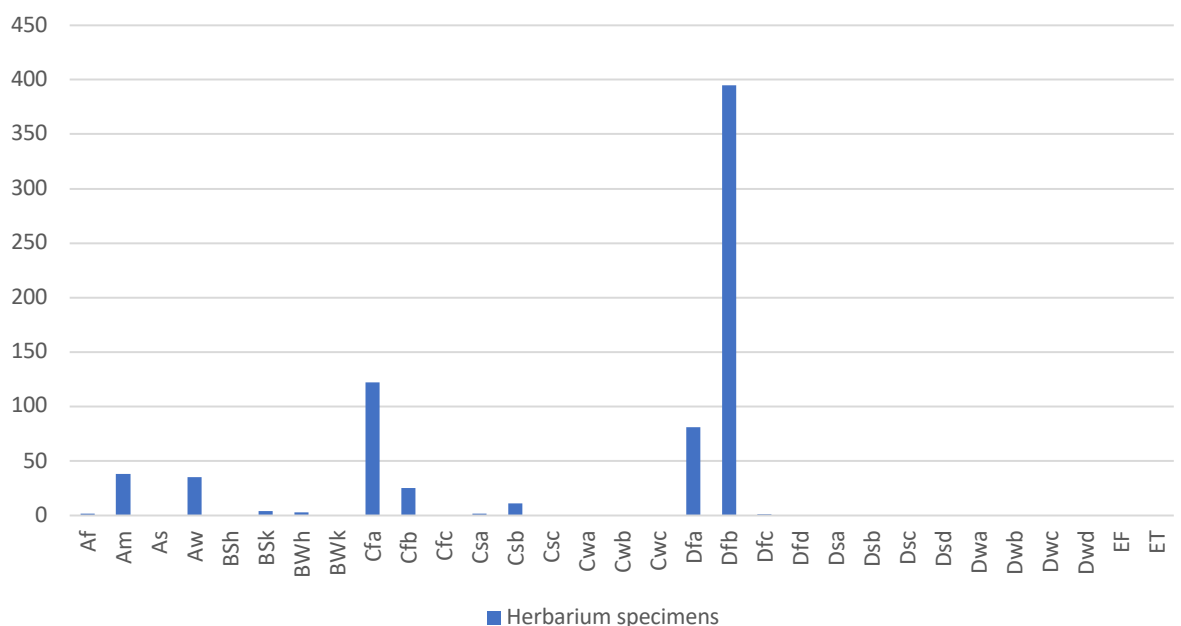

**5.3.4.3.2. Köppen profile, distribution and climate map** – GBIF occurrences of *Vallisneria annua* S.W.L.Jacobs & K.A.Frank 1997; herbarium specimens excluding duplicate occurrences (n = 142).

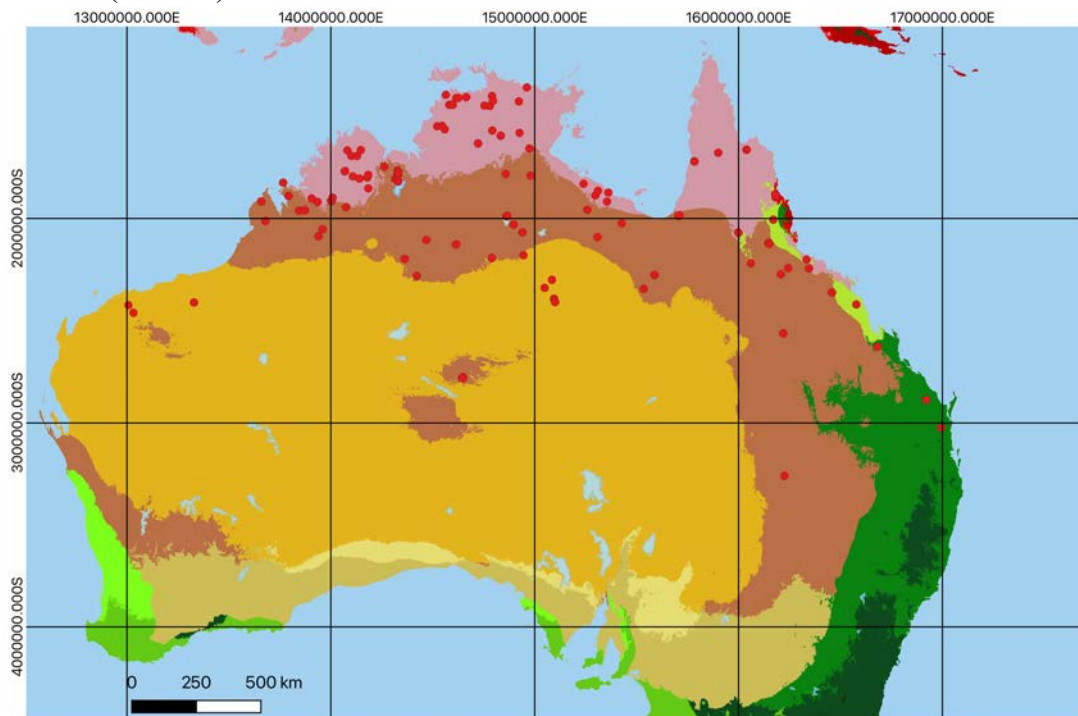

### Köppen profile of *Vallisneria annua*

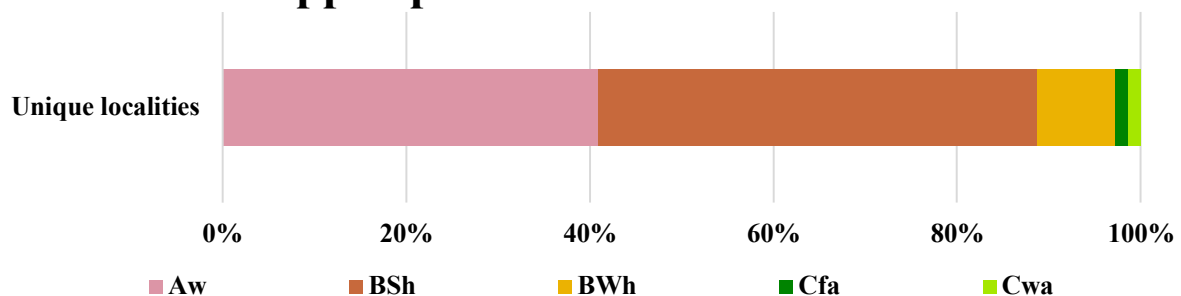

### Köppen profile of *Vallisneria annua*

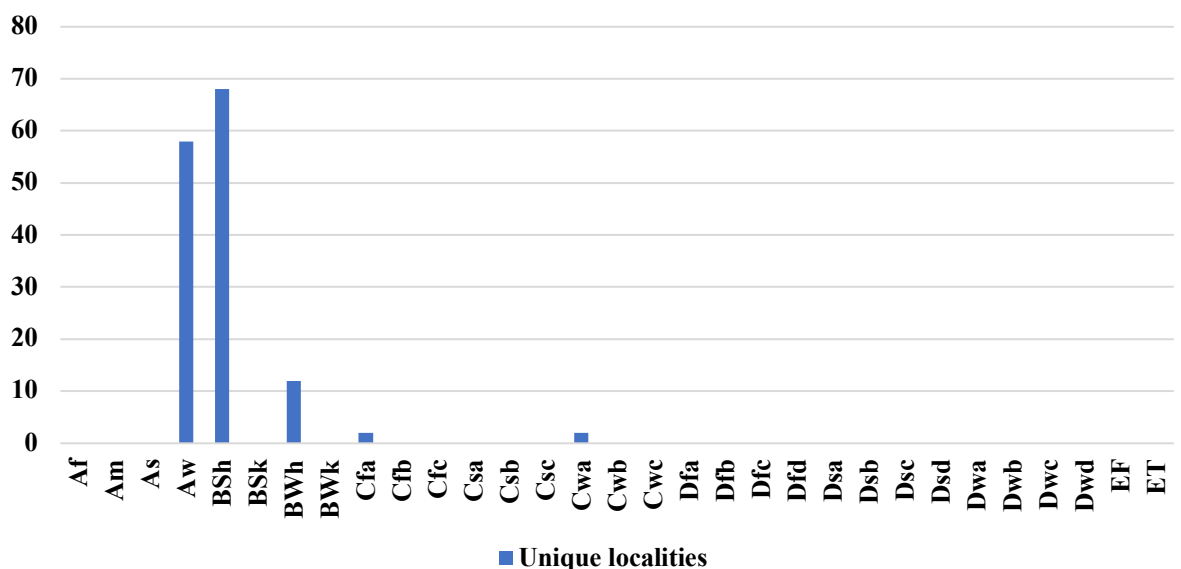

**5.3.4.3.3. Köppen profile, distribution and climate map** – GBIF occurrences of *Vallisneria caulescens* F.M.Bailey & F.Muell. 1888; herbarium specimens excluding duplicate occurrences (n = 101).

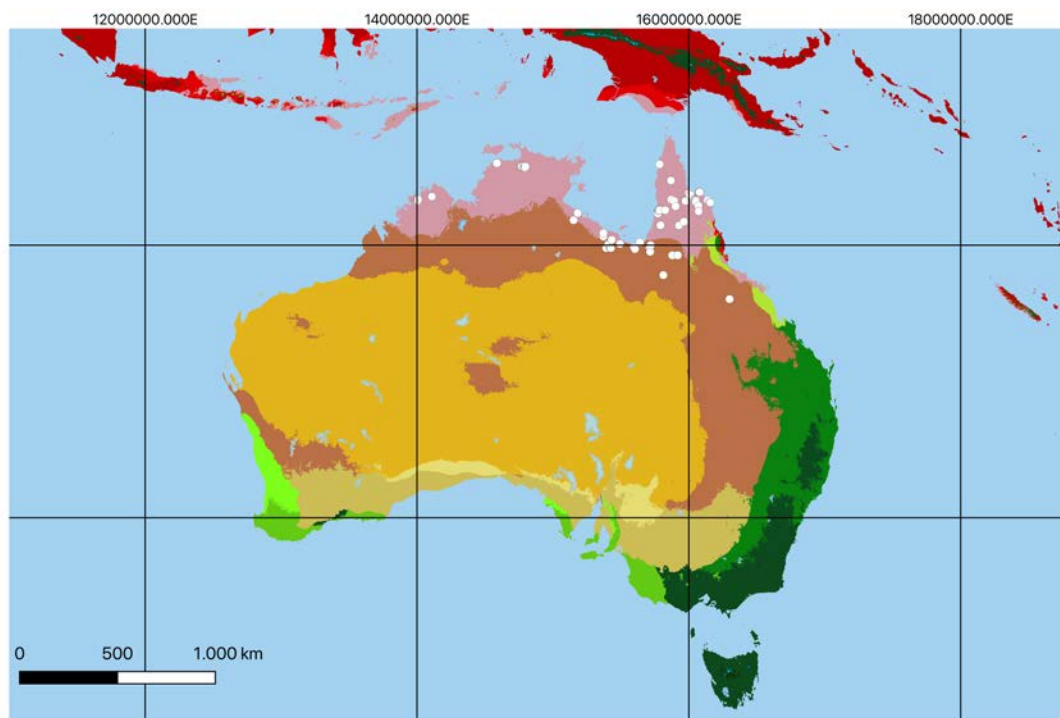

### Köppen profile of *Vallisneria caulescens*

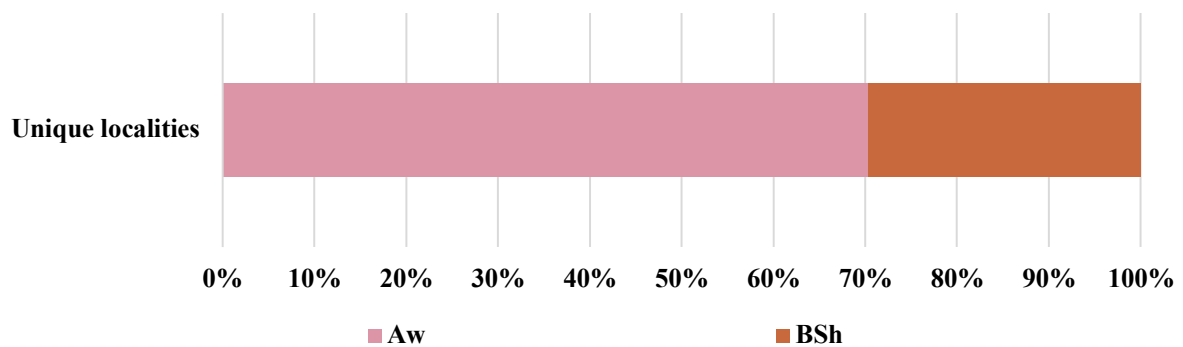

### Köppen profile of *Vallisneria caulescens*

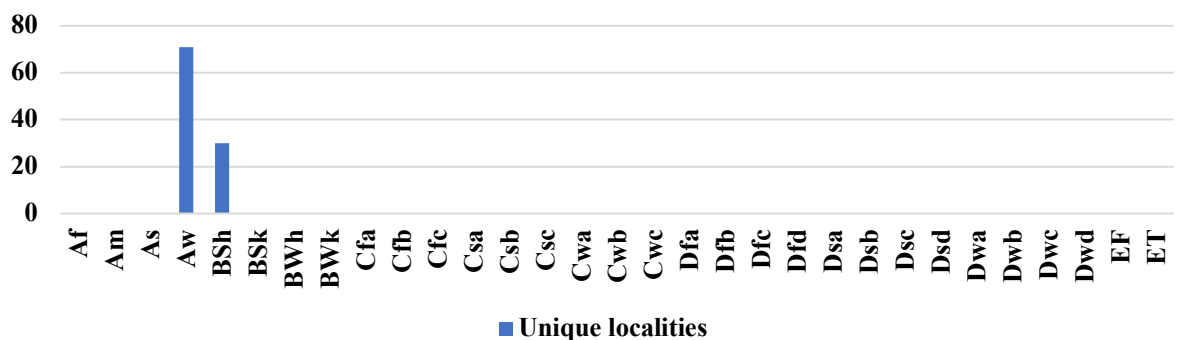

**5.3.4.3.4. Köppen profile, distribution and climate map** – GBIF occurrences of *Vallisneria denseserrulata* (Makino 1914) Makino 1921; herbarium specimens excluding duplicate occurrences (n = 25).

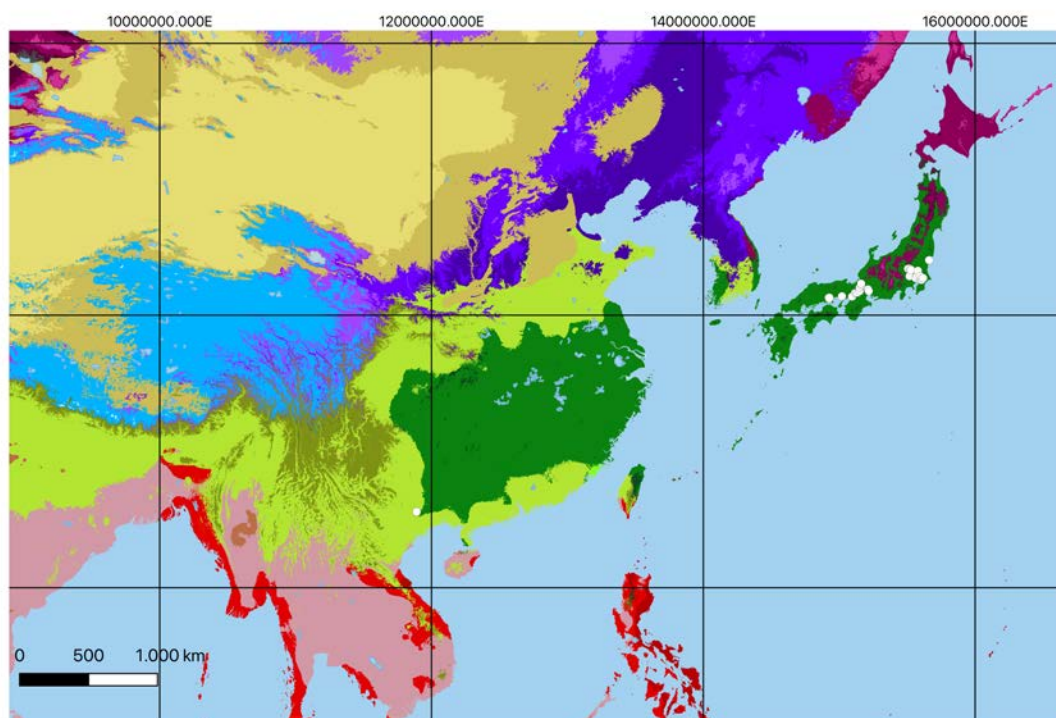

### Köppen profile of *Vallisneria denseserrulata*

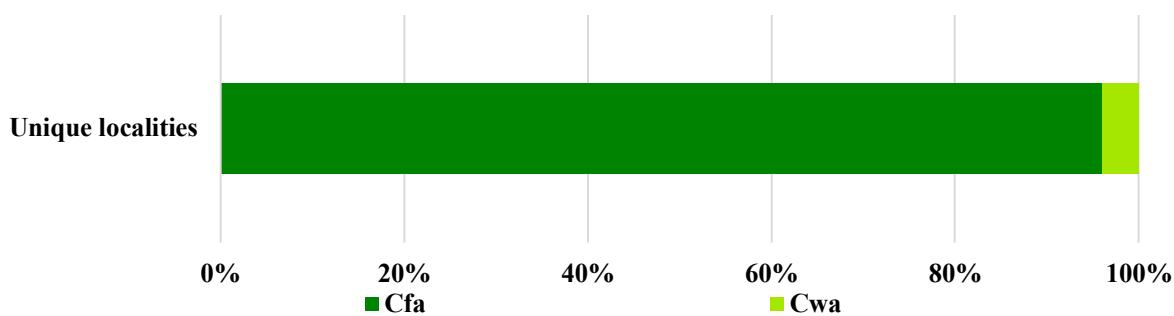

### Köppen profile of *Vallisneria denseserrulata*

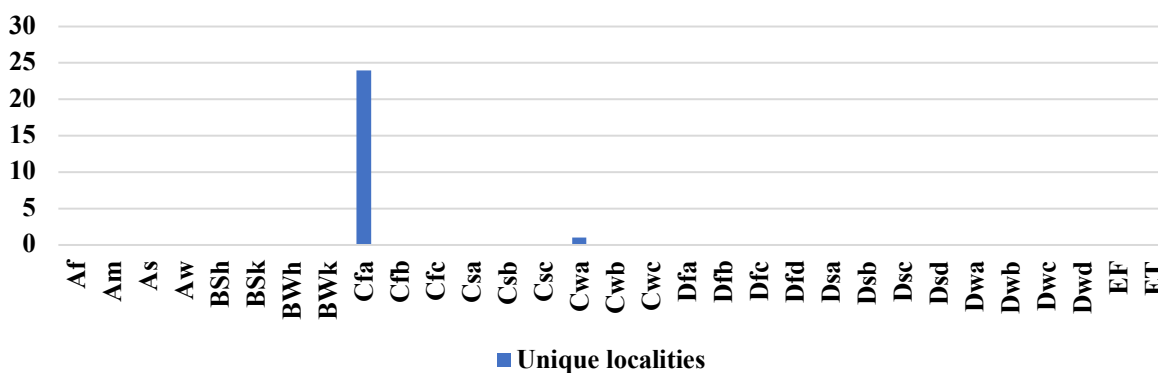

**5.3.4.3.5. Köppen profile, distribution and climate map** – GBIF occurrences of *Vallisneria erecta* S.W.L.Jacobs 2008; herbarium specimens excluding duplicate occurrences (n = 6).

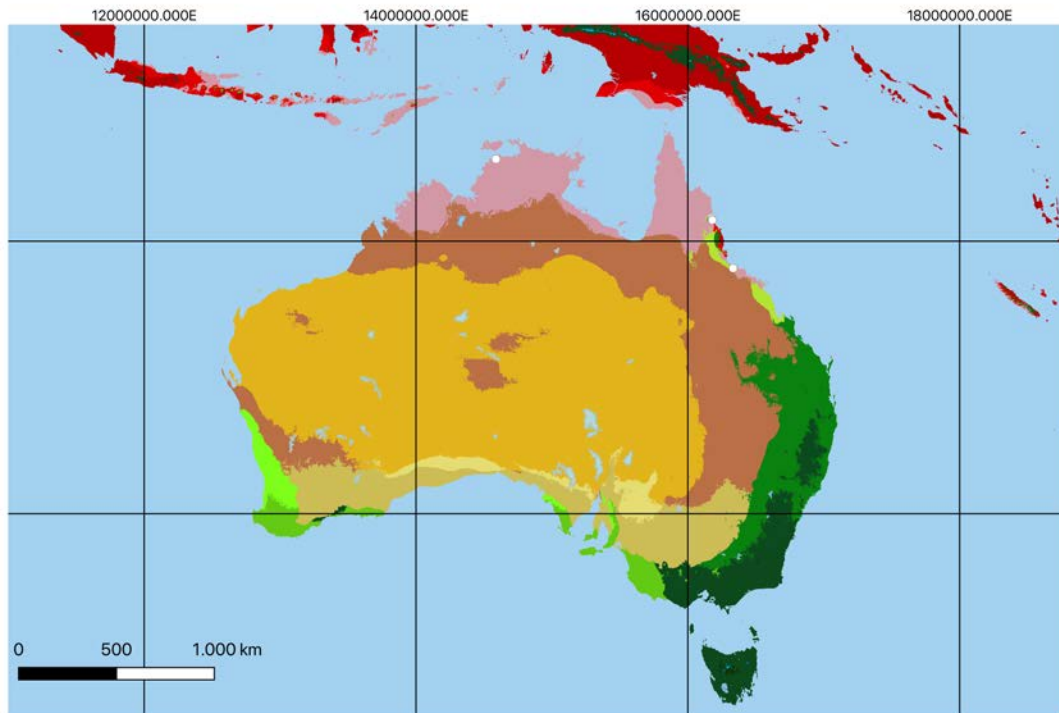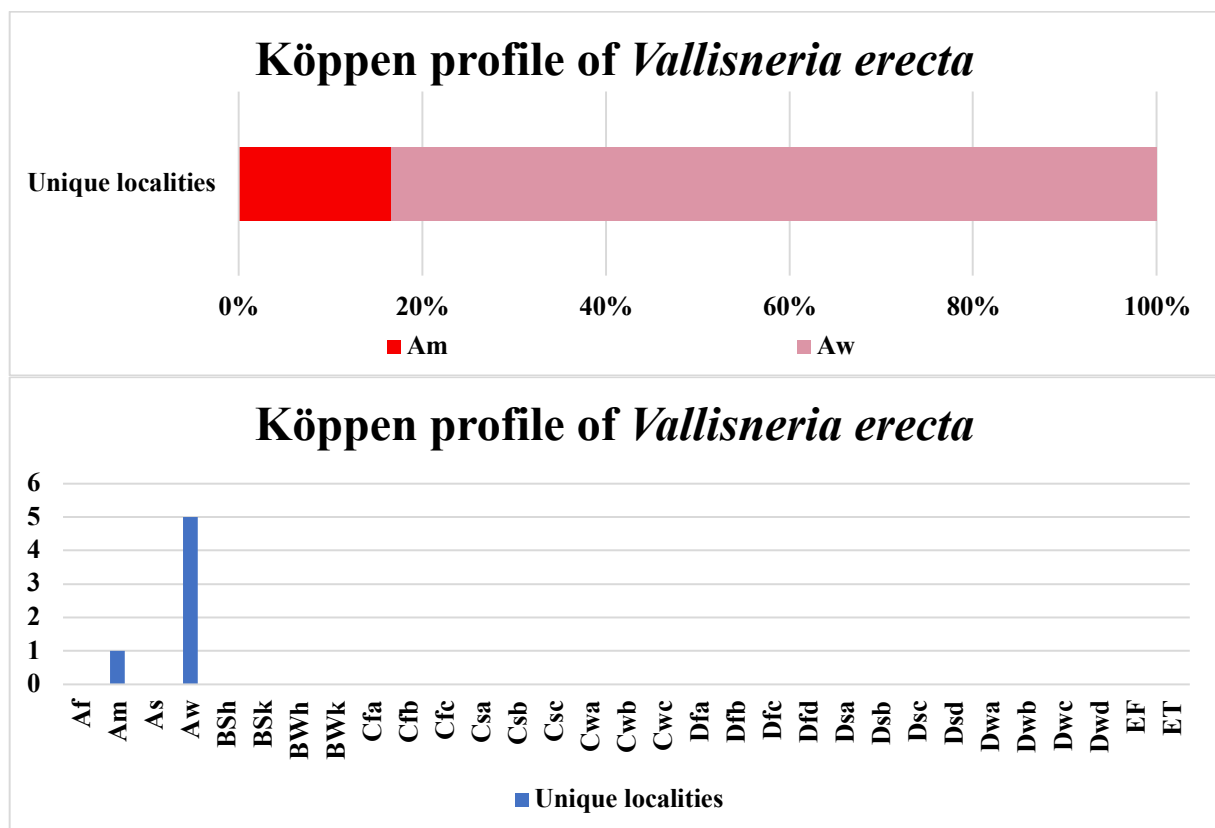

**5.3.4.3.6. Köppen profile, distribution and climate map** – GBIF occurrences of *Vallisneria nana* R.Br. 1810; herbarium specimens excluding duplicate occurrences (n = 291).

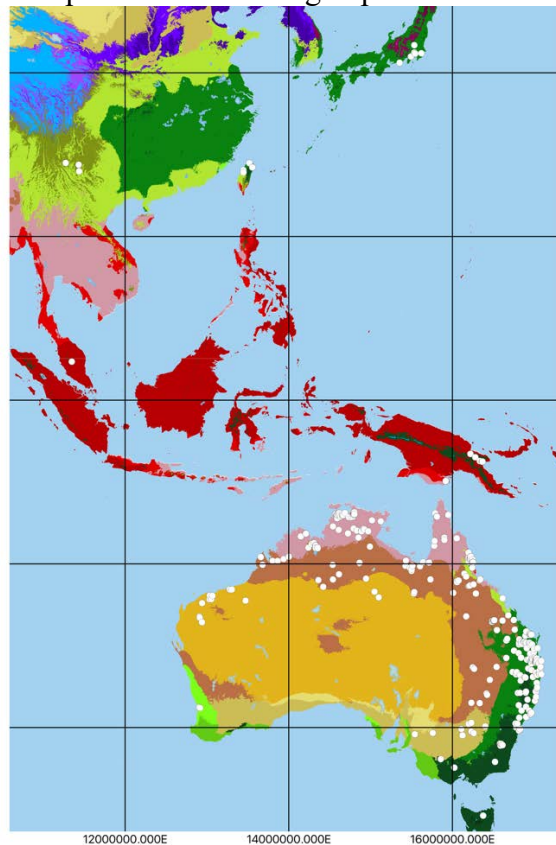

**Köppen profile of *Vallisneria nana***

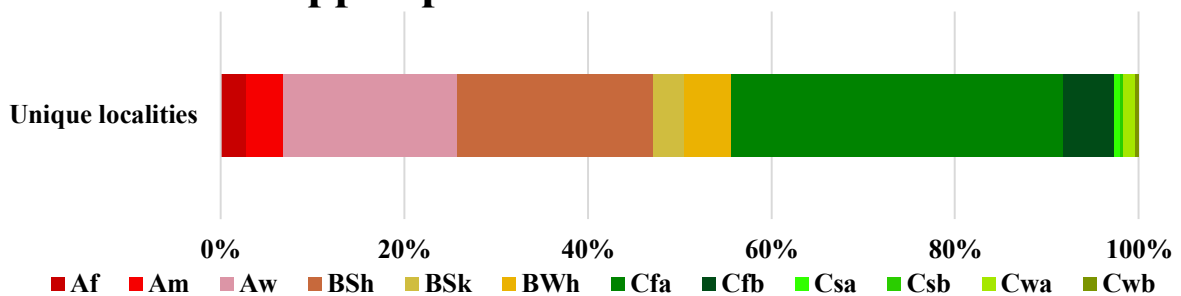

**Köppen profile of *Vallisneria nana***

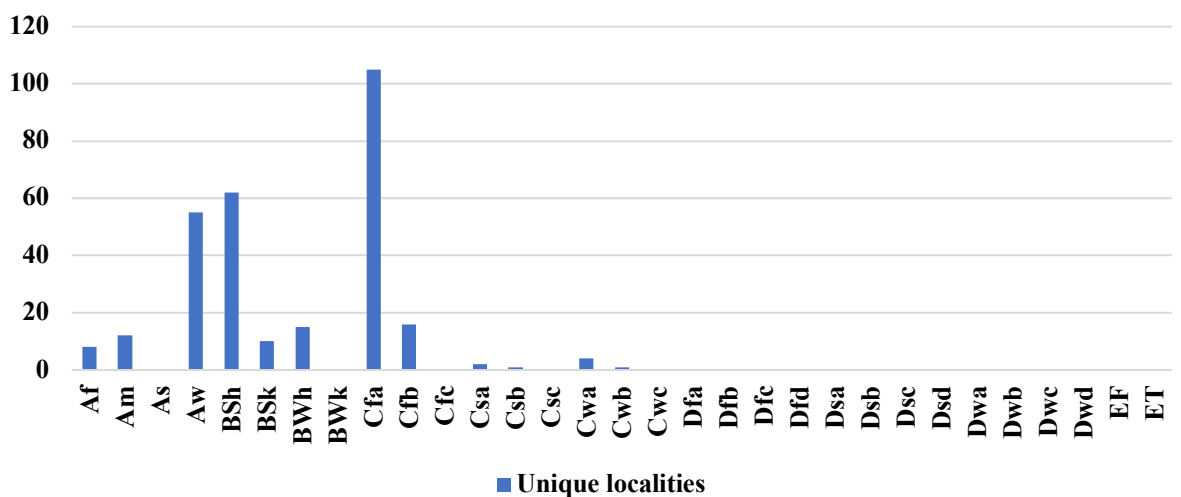

**5.3.4.3.7. Köppen profile, distribution and climate map** – GBIF occurrences of *Vallisneria natans* (Lour. 1790) H.Hara 1974 herbarium specimens excluding duplicate occurrences (n = 185).

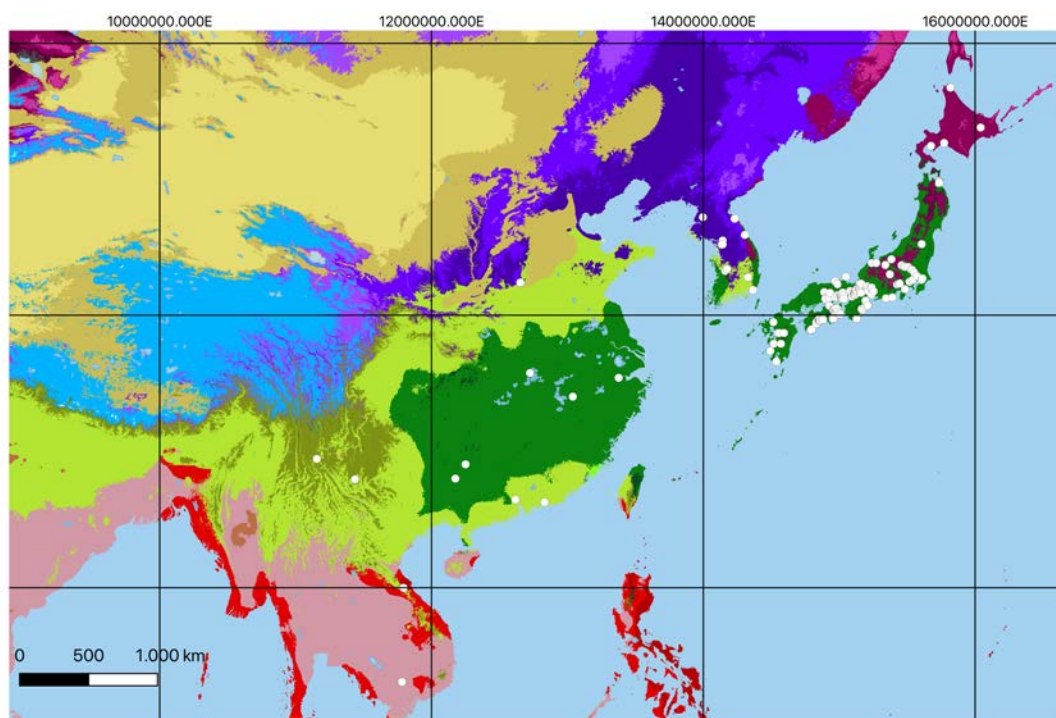

### Köppen profile of *Vallisneria natans*

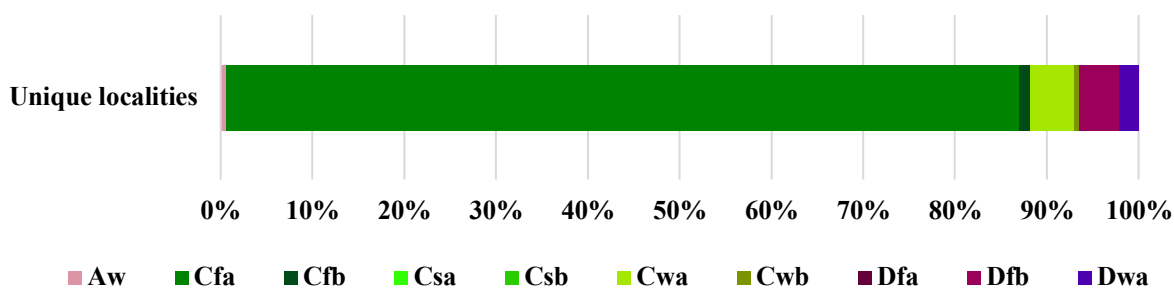

### Köppen profile of *Vallisneria natans*

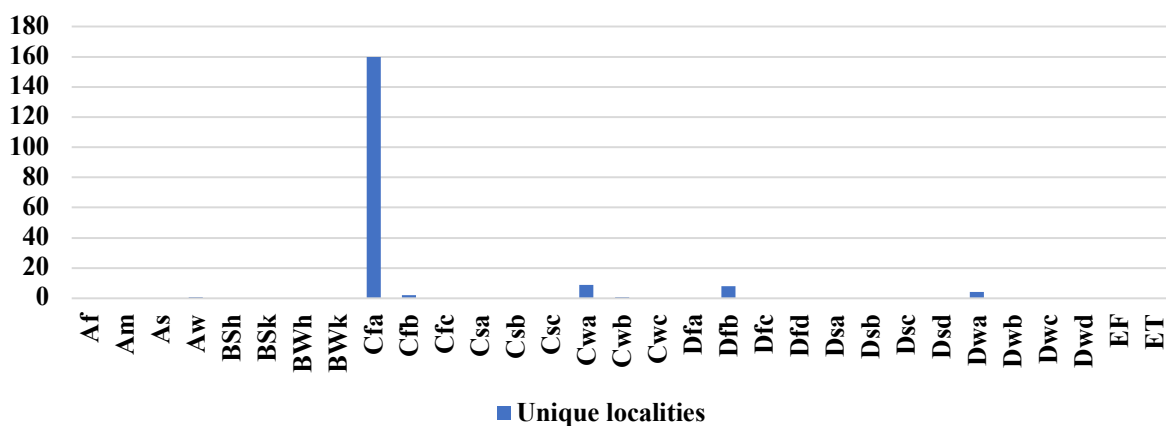

**5.3.4.3.8. Köppen profile, distribution and climate map** – GBIF occurrences of *Vallisneria rubra* (Rendle 1916) Les & S.W.L.Jacobs 2008; herbarium specimens excluding duplicate occurrences (n = 125).

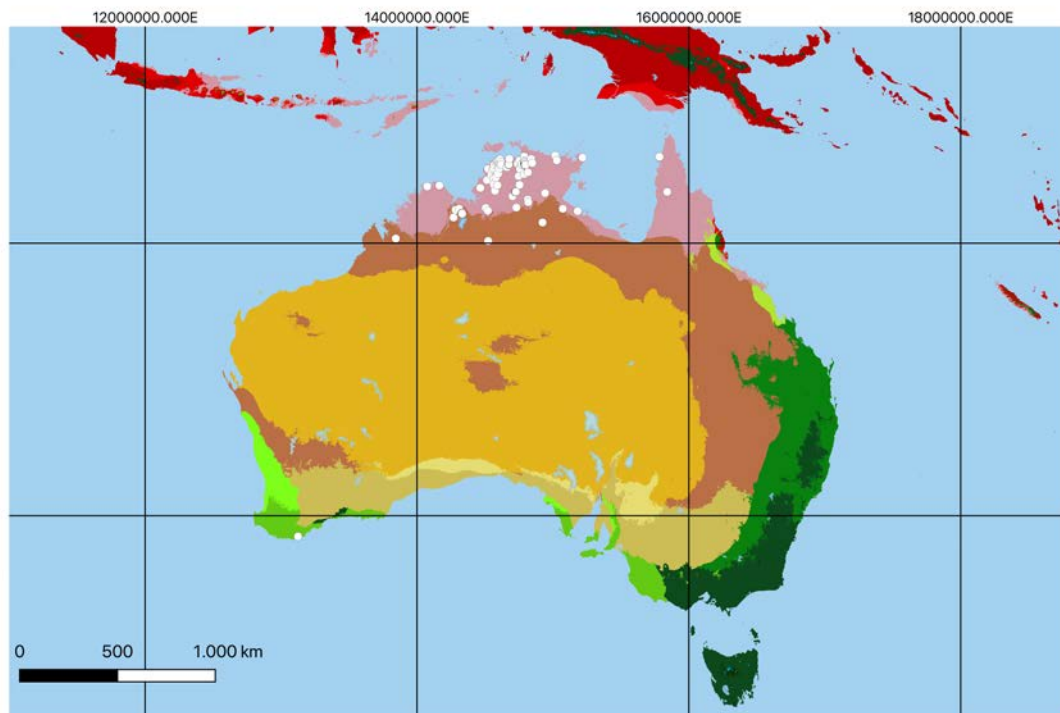

### Köppen profile of *Vallisneria rubra*

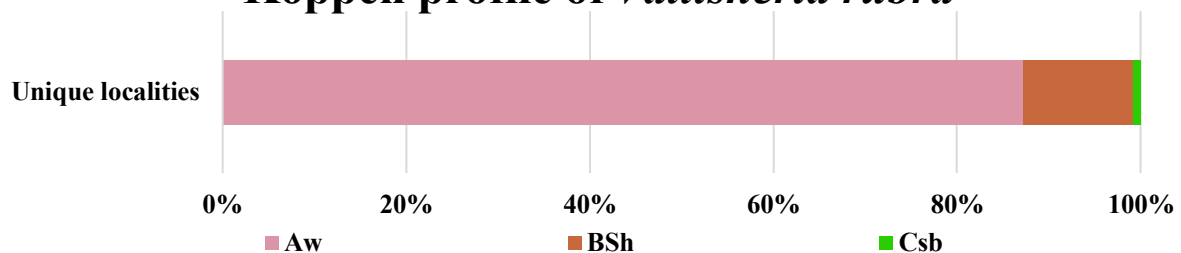

### Köppen profile of *Vallisneria rubra*

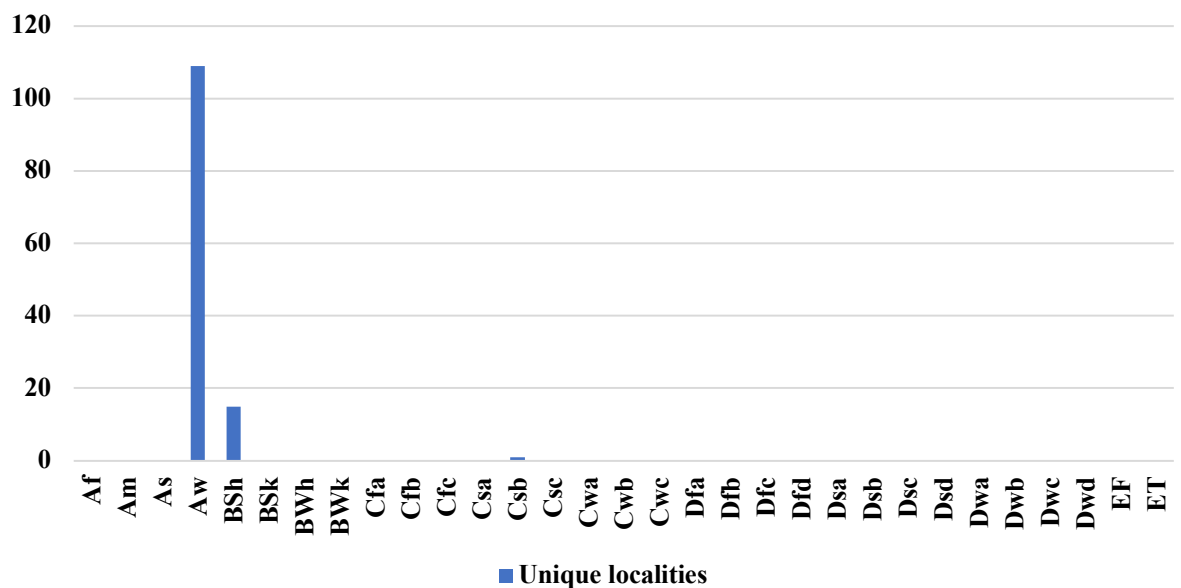

**5.3.4.3.9. Köppen profile, distribution and climate map** – GBIF occurrences of *Vallisneria spiralis* L. 1753; herbarium specimens excluding duplicate occurrences (n = 137).

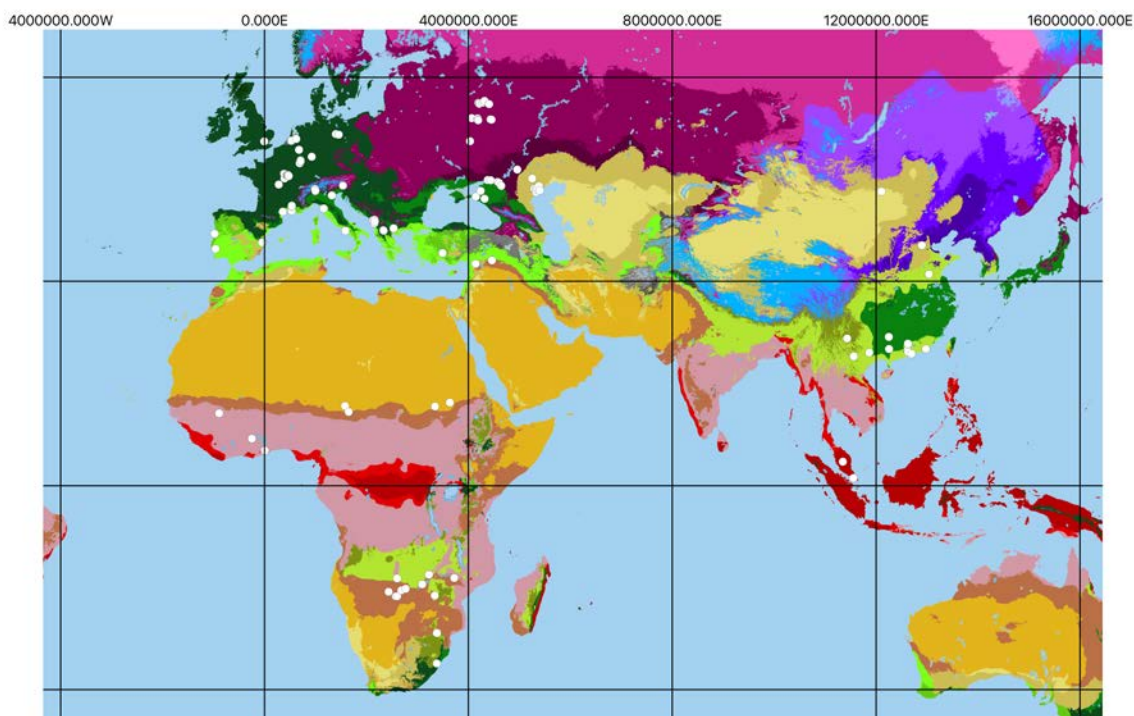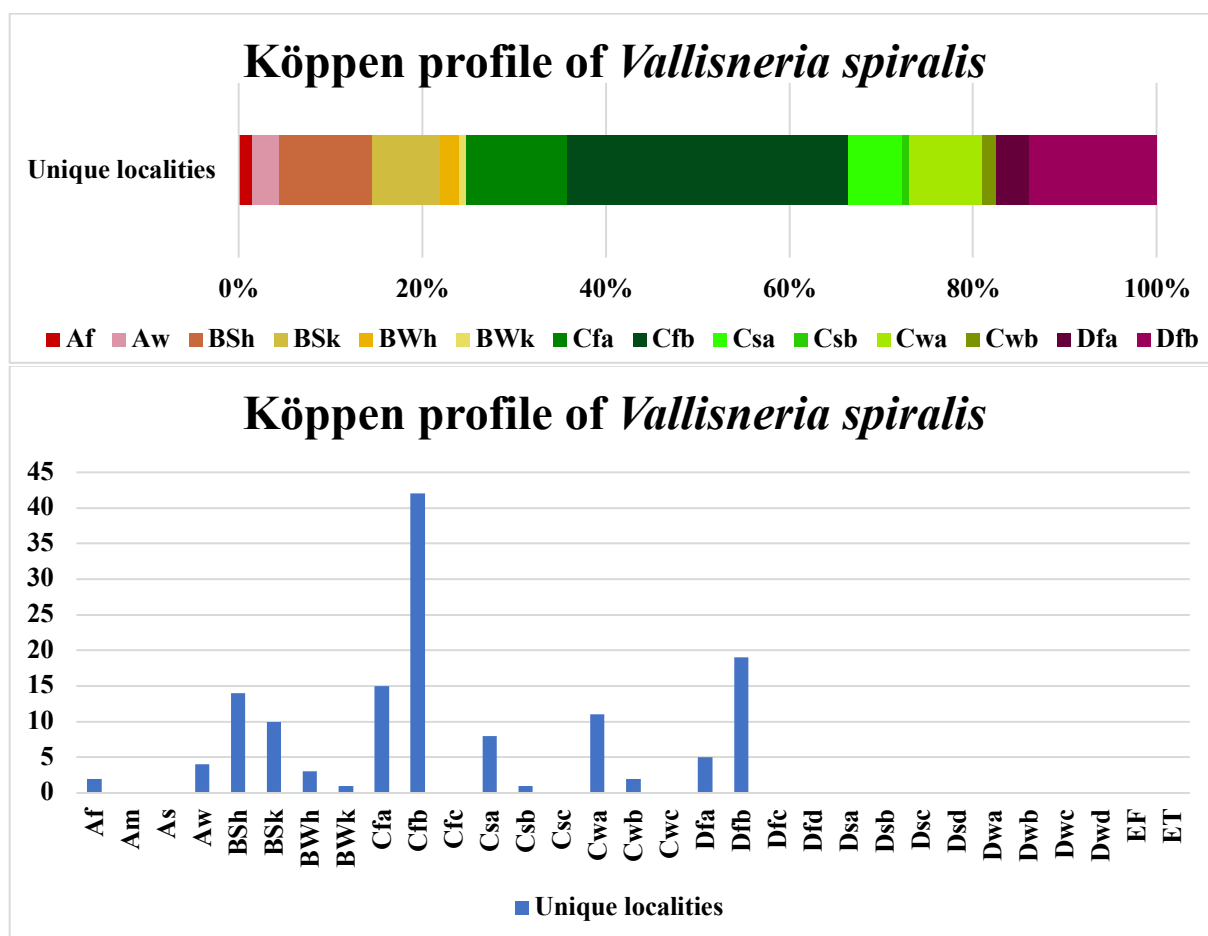

**5.3.4.3.10. Köppen profile, distribution and climate map – GBIF occurrences of *Vallisneria spinulosa* S.Z.Yan 1982; herbarium specimens excluding duplicate occurrences (n = 3).**

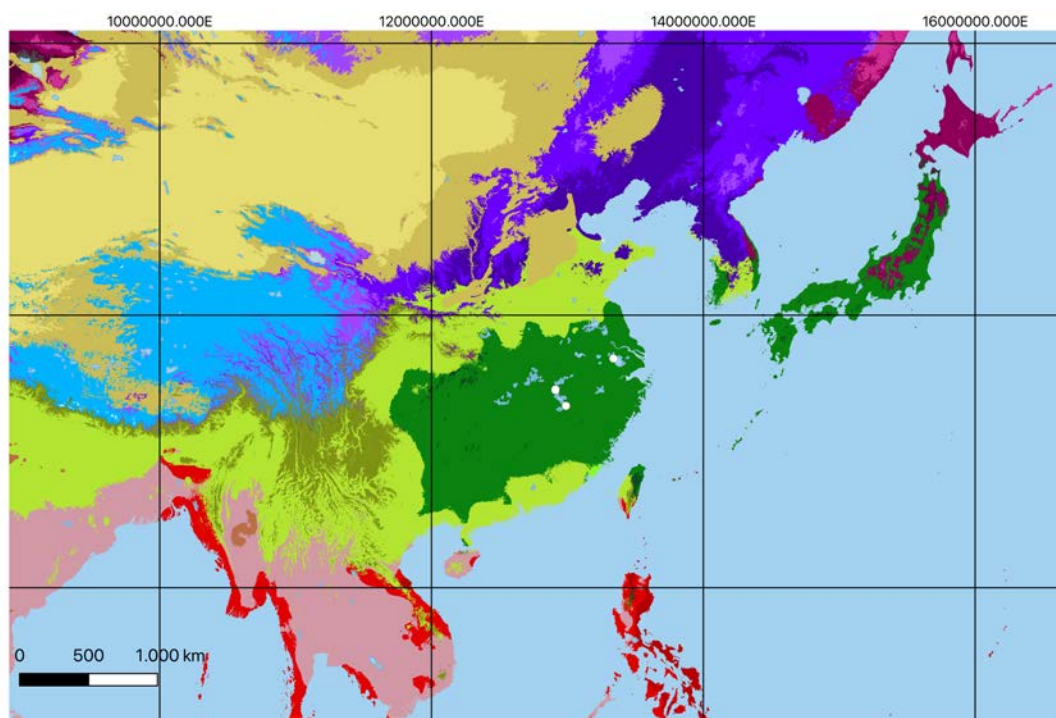

### Köppen profile of *Vallisneria spinulosa*

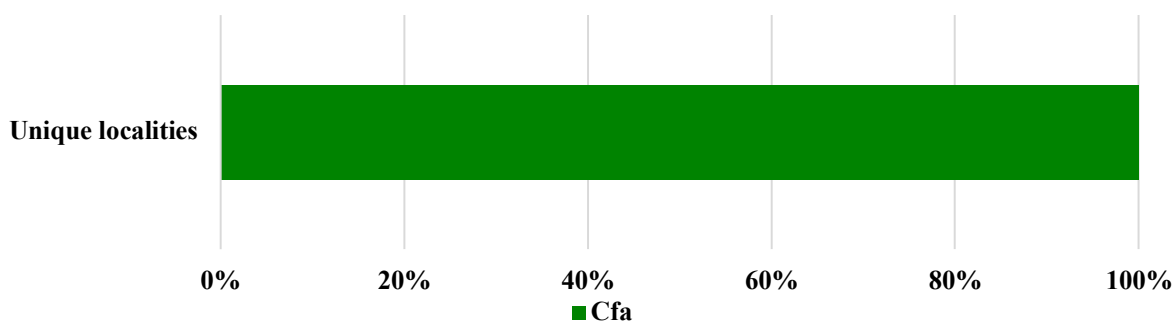

### Köppen profile of *Vallisneria spinulosa*

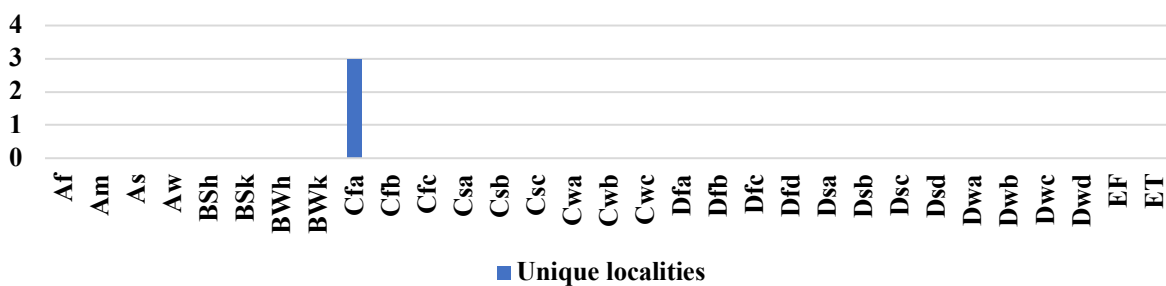

**5.3.4.3.11. Köppen profile, distribution and climate map – GBIF occurrences of *Vallisneria triptera* S.W.L.Jacobs & K.A.Frank 1997; herbarium specimens excluding duplicate occurrences (n = 38).**

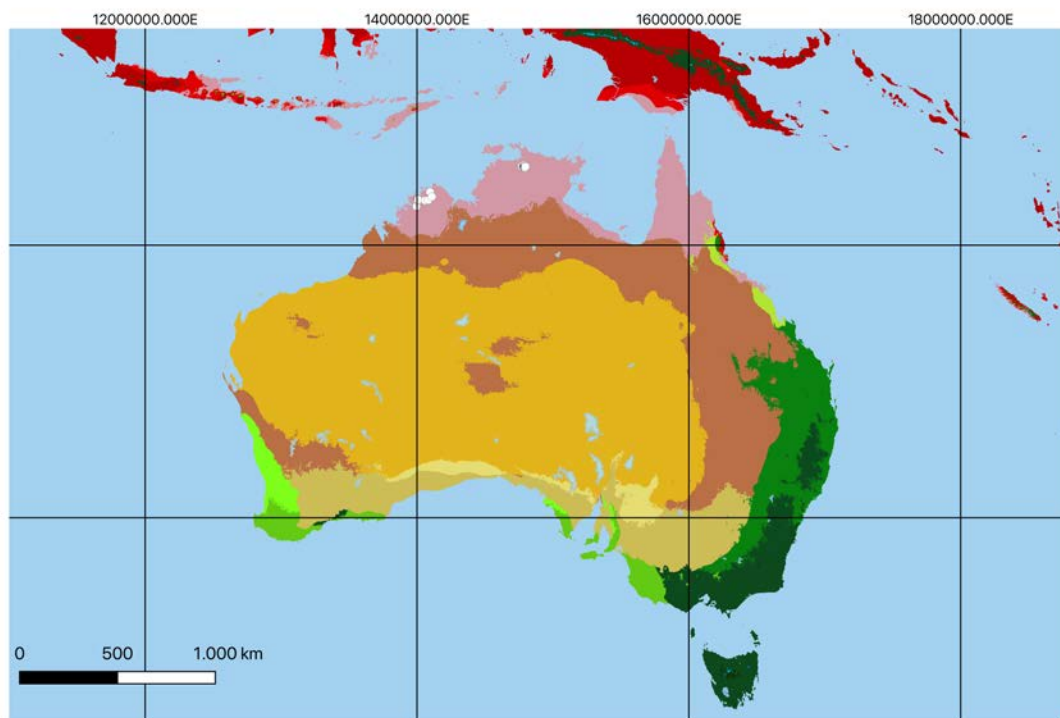

### Köppen profile of *Vallisneria triptera*

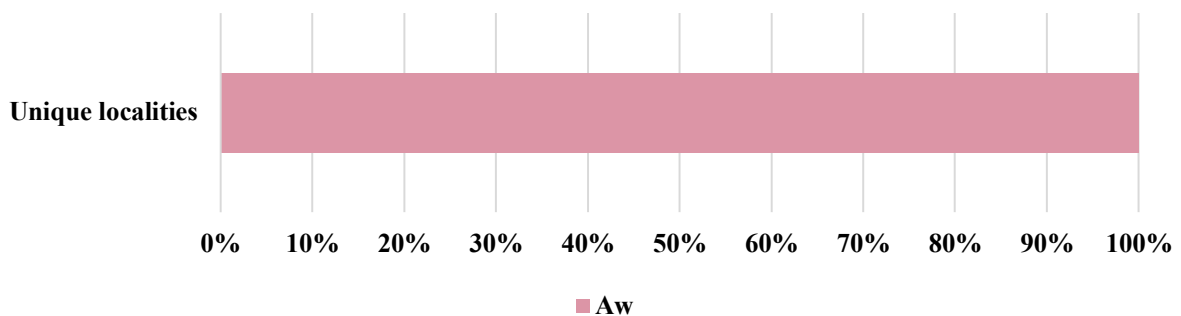

### Köppen profile of *Vallisneria triptera*

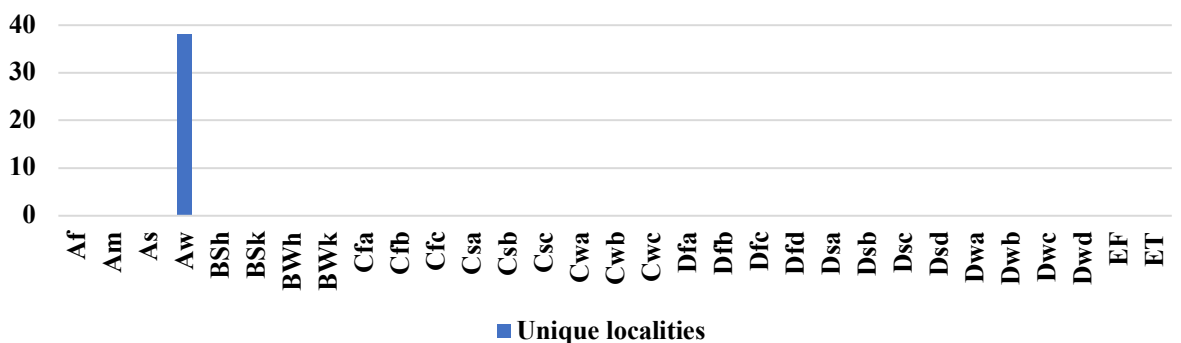

## GBIF datasets:

### *Blyxa*:

*Blyxa auberti* GBIF Data set: <https://doi.org/10.15468/dl.3j4svh>  
*Blyxa echinosperma* GBIF Data set: <https://doi.org/10.15468/dl.tz2q94>  
*Blyxa hexandra* GBIF Data set: <https://doi.org/10.15468/dl.m74dkr>  
*Blyxa japonica* GBIF Data set: <https://doi.org/10.15468/dl.qa5fwa>  
*Blyxa octandra* GBIF Data set: <https://doi.org/10.15468/dl.4cn2yg>  
*Blyxa senegalensis* GBIF Data set: <https://doi.org/10.15468/dl.tju7pg>  
*Blyxa shimadai* GBIF Data set: <https://doi.org/10.15468/dl.gt7uv3>  
*Blyxa somai* GBIF Data set: <https://doi.org/10.15468/dl.7ejqk9>

### *Egeria*:

*Egeria densa* GBIF Data set: <https://doi.org/10.15468/dl.ukwfx3>  
*Egeria heterostemon* GBIF Data set: <https://doi.org/10.15468/dl.hasy2z>  
*Egeria najas* GBIF Data set: <https://doi.org/10.15468/dl.9h5hst>

### *Elodea*:

*Elodea bifoliata* GBIF Data set: <https://doi.org/10.15468/dl.hhnwbb>  
*Elodea callitrichoides* GBIF Data set: <https://doi.org/10.15468/dl.neghzn>  
*Elodea canadensis* GBIF Data set: <https://doi.org/10.15468/dl.3nr47e>  
*Elodea granatensis* GBIF Data set: <https://doi.org/10.15468/dl.7t6hms>  
*Elodea nuttallii* GBIF Data set: <https://doi.org/10.15468/dl.7t79ef>  
*Elodea potamogeton* GBIF Data set: <https://doi.org/10.15468/dl.gacw7j>

### *Enhalus*:

*Enhalus bifoliata* GBIF Data set: <https://doi.org/10.15468/dl.7m27pd>

### *Halophila*:

*Halophila australis* GBIF Data set: <https://doi.org/10.15468/dl.g6maep>  
*Halophila baillonis* GBIF Data set: <https://doi.org/10.15468/dl.6uswb5>  
*Halophila beccari* GBIF Data set: <https://doi.org/10.15468/dl.9bk8sz>  
*Halophila capricorni* GBIF Data set: <https://doi.org/10.15468/dl.4ug7ez>  
*Halophila decipiens* GBIF Data set: <https://doi.org/10.15468/dl.4z58jg>  
*Halophila engelmannii* GBIF Data set: <https://doi.org/10.15468/dl.sv6uhx>  
*Halophila gaudichaudii* GBIF Data set: <https://doi.org/10.15468/dl.9zx4bm>  
*Halophila hawaiiiana* GBIF Data set: <https://doi.org/10.15468/dl.ycijn6>  
*Halophila major* GBIF Data set: <https://doi.org/10.15468/dl.ipu9t2>  
*Halophila minor* GBIF Data set: <https://doi.org/10.15468/dl.rn36mp>  
*Halophila nipponica* GBIF Data set: <https://doi.org/10.15468/dl.sxxf8d>  
*Halophila ovalis* GBIF Data set: <https://doi.org/10.15468/dl.9kye3d>  
*Halophila spinulosa* GBIF Data set: <https://doi.org/10.15468/dl.e8gzfx>  
*Halophila stipulaceae* GBIF Data set: <https://doi.org/10.15468/dl.ekfzps>  
*Halophila sulawesii* GBIF Data set: <https://doi.org/10.15468/dl.wzyxq6>  
*Halophila tricostrata* GBIF Data set: <https://doi.org/10.15468/dl.he7ef8>

### *Hydrilla*:

*Hydrilla verticillata* GBIF Data set: <https://doi.org/10.15468/dl.fq8rxg>

*Hydrocharis:*

*Hydrocharis chevalieri* GBIF Data set: <https://doi.org/10.15468/dl.rvpz6w>

*Hydrocharis dubia* GBIF Data set: <https://doi.org/10.15468/dl.r8nnx4>

*Hydrocharis morsus-ranae* GBIF Data set: <https://doi.org/10.15468/dl.naq388>

*Hydrocharis laevigatum* GBIF Data set: <https://doi.org/10.15468/dl.59kdvq>

*Hydrocharis spongia* GBIF Data set: <https://doi.org/10.15468/dl.rwq9fy>

*Hydromystris:*

*Hydromystris stolonifera* GBIF Data set: <https://doi.org/10.15468/dl.jpuj77>

*Lagarosiphon:*

*Lagarosiphon cordofanus* GBIF Data set: <https://doi.org/10.15468/dl.kvunr9>

*Lagarosiphon hydrilloides* GBIF Data set: <https://doi.org/10.15468/dl.6hmd2f>

*Lagarosiphon ilicifolius* GBIF Data set: <https://doi.org/10.15468/dl.ff3xzb>

*Lagarosiphon madagascariensis* GBIF Data set: <https://doi.org/10.15468/dl.8fmajb>

*Lagarosiphon major* GBIF Data set: <https://doi.org/10.15468/dl.2p5pe5>

*Lagarosiphon muscoides* GBIF Data set: <https://doi.org/10.15468/dl.yk5qmf>

*Lagarosiphon rubellus* GBIF Data set: <https://doi.org/10.15468/dl.j9n25k>

*Lagarosiphon steudneri* GBIF Data set: <https://doi.org/10.15468/dl.ry68r9>

*Lagarosiphon verticillifolius* GBIF Data set: <https://doi.org/10.15468/dl.hmndzn>

*Najas:*

*Najas affinis* GBIF data set: <https://doi.org/10.15468/dl.t26may>

*Najas ancistrocarpa* GBIF data set: <https://doi.org/10.15468/dl.6rxsax>

*Najas arguta* GBIF data set: <https://doi.org/10.15468/dl.c85mtz>

*Najas australis* GBIF data set: <https://doi.org/10.15468/dl.sd69ng>

*Najas baldwinia* GBIF data set: <https://doi.org/10.15468/dl.ejhxz2>

*Najas browniana* GBIF data set: <https://doi.org/10.15468/dl.5a374t>

*Najas chinensis* GBIF data set: <https://doi.org/10.15468/dl.kg84zf>

*Najas conferta* GBIF data set: <https://doi.org/10.15468/dl.ya2xhn>

*Najas filifolia* GBIF data set: <https://doi.org/10.15468/dl.a5h9cz>

*Najas flexilis* GBIF data set: <https://doi.org/10.15468/dl.wtfxmf>

*Najas gracillima* GBIF data set: <https://doi.org/10.15468/dl.kfnjf9>

*Najas graminea* GBIF data set: <https://doi.org/10.15468/dl.ckrhqm>

*Najas guadalupensis* GBIF data set: <https://doi.org/10.15468/dl.v9ncbf>

*Najas hagerupi* GBIF data set: <https://doi.org/10.15468/dl.5449n3>

*Najas halophila* GBIF data set: <https://doi.org/10.15468/dl.vbrmdz>

*Najas horrida* GBIF data set: <https://doi.org/10.15468/dl.gudekj>

*Najas indica* GBIF data set: <https://doi.org/10.15468/dl.5dkpwa>

*Najas kurziana* GBIF data set: <https://doi.org/10.15468/dl.6xpwq9>

*Najas madagascariensis* GBIF data set: <https://doi.org/10.15468/dl.qukumw>

*Najas malesiana* GBIF data set: <https://doi.org/10.15468/dl.a6npgw>

*Najas marina* GBIF data set: <https://doi.org/10.15468/dl.56v9xt>

*Najas oguraensis* GBIF data set: <https://doi.org/10.15468/dl.3r3wnd>

*Najas pectinata* GBIF data set: <https://doi.org/10.15468/dl.xgwnfj>

*Najas schweinfurthii* GBIF data set: <https://doi.org/10.15468/dl.eckvda>

*Najas tenuicaulis* GBIF data set: <https://doi.org/10.15468/dl.2rsn6q>

*Najas tenuifolia* GBIF data set: <https://doi.org/10.15468/dl.j6vqgj>

*Najas tenuis* GBIF data set: <https://doi.org/10.15468/dl.wsdw8n>

*Najas tenuissima* GBIF data set: <https://doi.org/10.15468/dl.xepmw8>

*Najas testui* GBIF data set: <https://doi.org/10.15468/dl.yufchs>

*Najas welwitschii* GBIF data set: <https://doi.org/10.15468/dl.pqb8za>  
*Najas wrightiana* GBIF data set: <https://doi.org/10.15468/dl.388e94>

*Nechamandra*:

*Nechamandra alternifolia* GBIF data set: <https://doi.org/10.15468/dl.f8c75z>

*Ottelia*:

*Ottelia acuminata* GBIF Data set: <https://doi.org/10.15468/dl.nhbs3u>  
*Ottelia alismoides* GBIF Data set: <https://doi.org/10.15468/dl.9n24x3>  
*Ottelia balansae* GBIF Data set: <https://doi.org/10.15468/dl.wkv6zr>  
*Ottelia brasiliensis* GBIF Data set: <https://doi.org/10.15468/dl.grsbhp>  
*Ottelia cordata* GBIF Data set: <https://doi.org/10.15468/dl.bwkw4n>  
*Ottelia cylindrica* GBIF Data set: <https://doi.org/10.15468/dl.ncjp28>  
*Ottelia exserta* GBIF Data set: <https://doi.org/10.15468/dl.v2aebv>  
*Ottelia fischeri* GBIF Data set: <https://doi.org/10.15468/dl.7bzdda>  
*Ottelia javanica* GBIF Data set: <https://doi.org/10.15468/dl.9dgnap>  
*Ottelia kunensis* GBIF Data set: <https://doi.org/10.15468/dl.e47va7>  
*Ottelia mesenterium* GBIF Data set: <https://doi.org/10.15468/dl.6p8qdx>  
*Ottelia muricata* GBIF Data set: <https://doi.org/10.15468/dl.p4yhfufu>  
*Ottelia ovalifolia* GBIF Data set: <https://doi.org/10.15468/dl.5pdqds>  
*Ottelia ulvifolia* GBIF Data set: <https://doi.org/10.15468/dl.x5dm62>  
*Ottelia verdickii* GBIF Data set: <https://doi.org/10.15468/dl.csnbg2>

*Stratiotes*:

*Stratiotes aloides* GBIF Data set: <https://doi.org/10.15468/dl.stx76u>

*Thalassia*:

*Thalassia* GBIF Data set: <https://doi.org/10.15468/dl.82h3sg>

*Vallisneria*:

*Vallisneria americana* GBIF data set: <https://doi.org/10.15468/dl.wqf33a>  
*Vallisneria annua* GBIF data set: <https://doi.org/10.15468/dl.cq9ngt>  
*Vallisneria australis* GBIF data set: <https://doi.org/10.15468/dl.cq9ngt>  
*Vallisneria caulescens* GBIF data set: <https://doi.org/10.15468/dl.2m7v5v>  
*Vallisneria denseserrulata* GBIF data set: <https://doi.org/10.15468/dl.ukg4ed>  
*Vallisneria erecta* GBIF data set: <https://doi.org/10.15468/dl.rdyx2b>  
*Vallisneria natans* GBIF data set: <https://doi.org/10.15468/dl.wkhqv4>  
*Vallisneria nana* GBIF data set: <https://doi.org/10.15468/dl.hvka99>  
*Vallisneria rubra* GBIF data set: <https://doi.org/10.15468/dl.knjwsx>  
*Vallisneria spinulosa* GBIF data set: <https://doi.org/10.15468/dl.j364pd>  
*Vallisneria spiralis* GBIF data set: <https://doi.org/10.15468/dl.72599d>  
*Vallisneria triptera* GBIF data set: <https://doi.org/10.15468/dl.8vs4g9>

## References:

- Chen, L.-Y., Chen, J.-M., Gituru, R. W., Wang, Q.-F. 2012. Generic phylogeny, historical biogeography and character evolution of the cosmopolitan aquatic plant family Hydrocharitaceae. *BMC Evolutionary Biology*, 12, 30.
- Cui, D., Liang, S., Wang, D., Liu, Z. 2021. A 1 km global dataset of historical (1979–2013) and future (2020–2100) Köppen–Geiger climate classification and bioclimatic variables. *Earth Syst. Sci. Data*, 13, 5087–5114. <https://doi.org/10.5194/essd-13-5087-2021>
- Kottek, M., Grieser, J., Beck, C., Rudolf, B., and Rubel, F. 2006. World map of the Köppen–Geiger climate classification updated, *Meteorol. Z.*, 15, 259–263.
- Peel, M. C., Finlayson, B. L., and McMahon, T. A. 2007. Updated world map of the Köppen–Geiger climate classification, *Hydrol. Earth Syst. Sci.*, 11, 1633–1644, <https://doi.org/10.5194/hess-11-1633-2007>.
- Rubel, F., Brugger, K., Haslinger, K., and Auer, I. 2017. The climate of the European Alps: Shift of very high resolution Köppen–Geiger climate zones 1800–2100, *Meteorol. Z.*, 26, 115–125, <https://doi.org/10.1127/metz/2016/0816>.
