# Supplementary figures and images for: Origin and Early Evolution of Hydrocharitaceae and the Ancestral Role of Stratiotes
Source: MDPI journal article supplement (doi:10.3390/plants13071008), 2024-03-31

# Bayesian

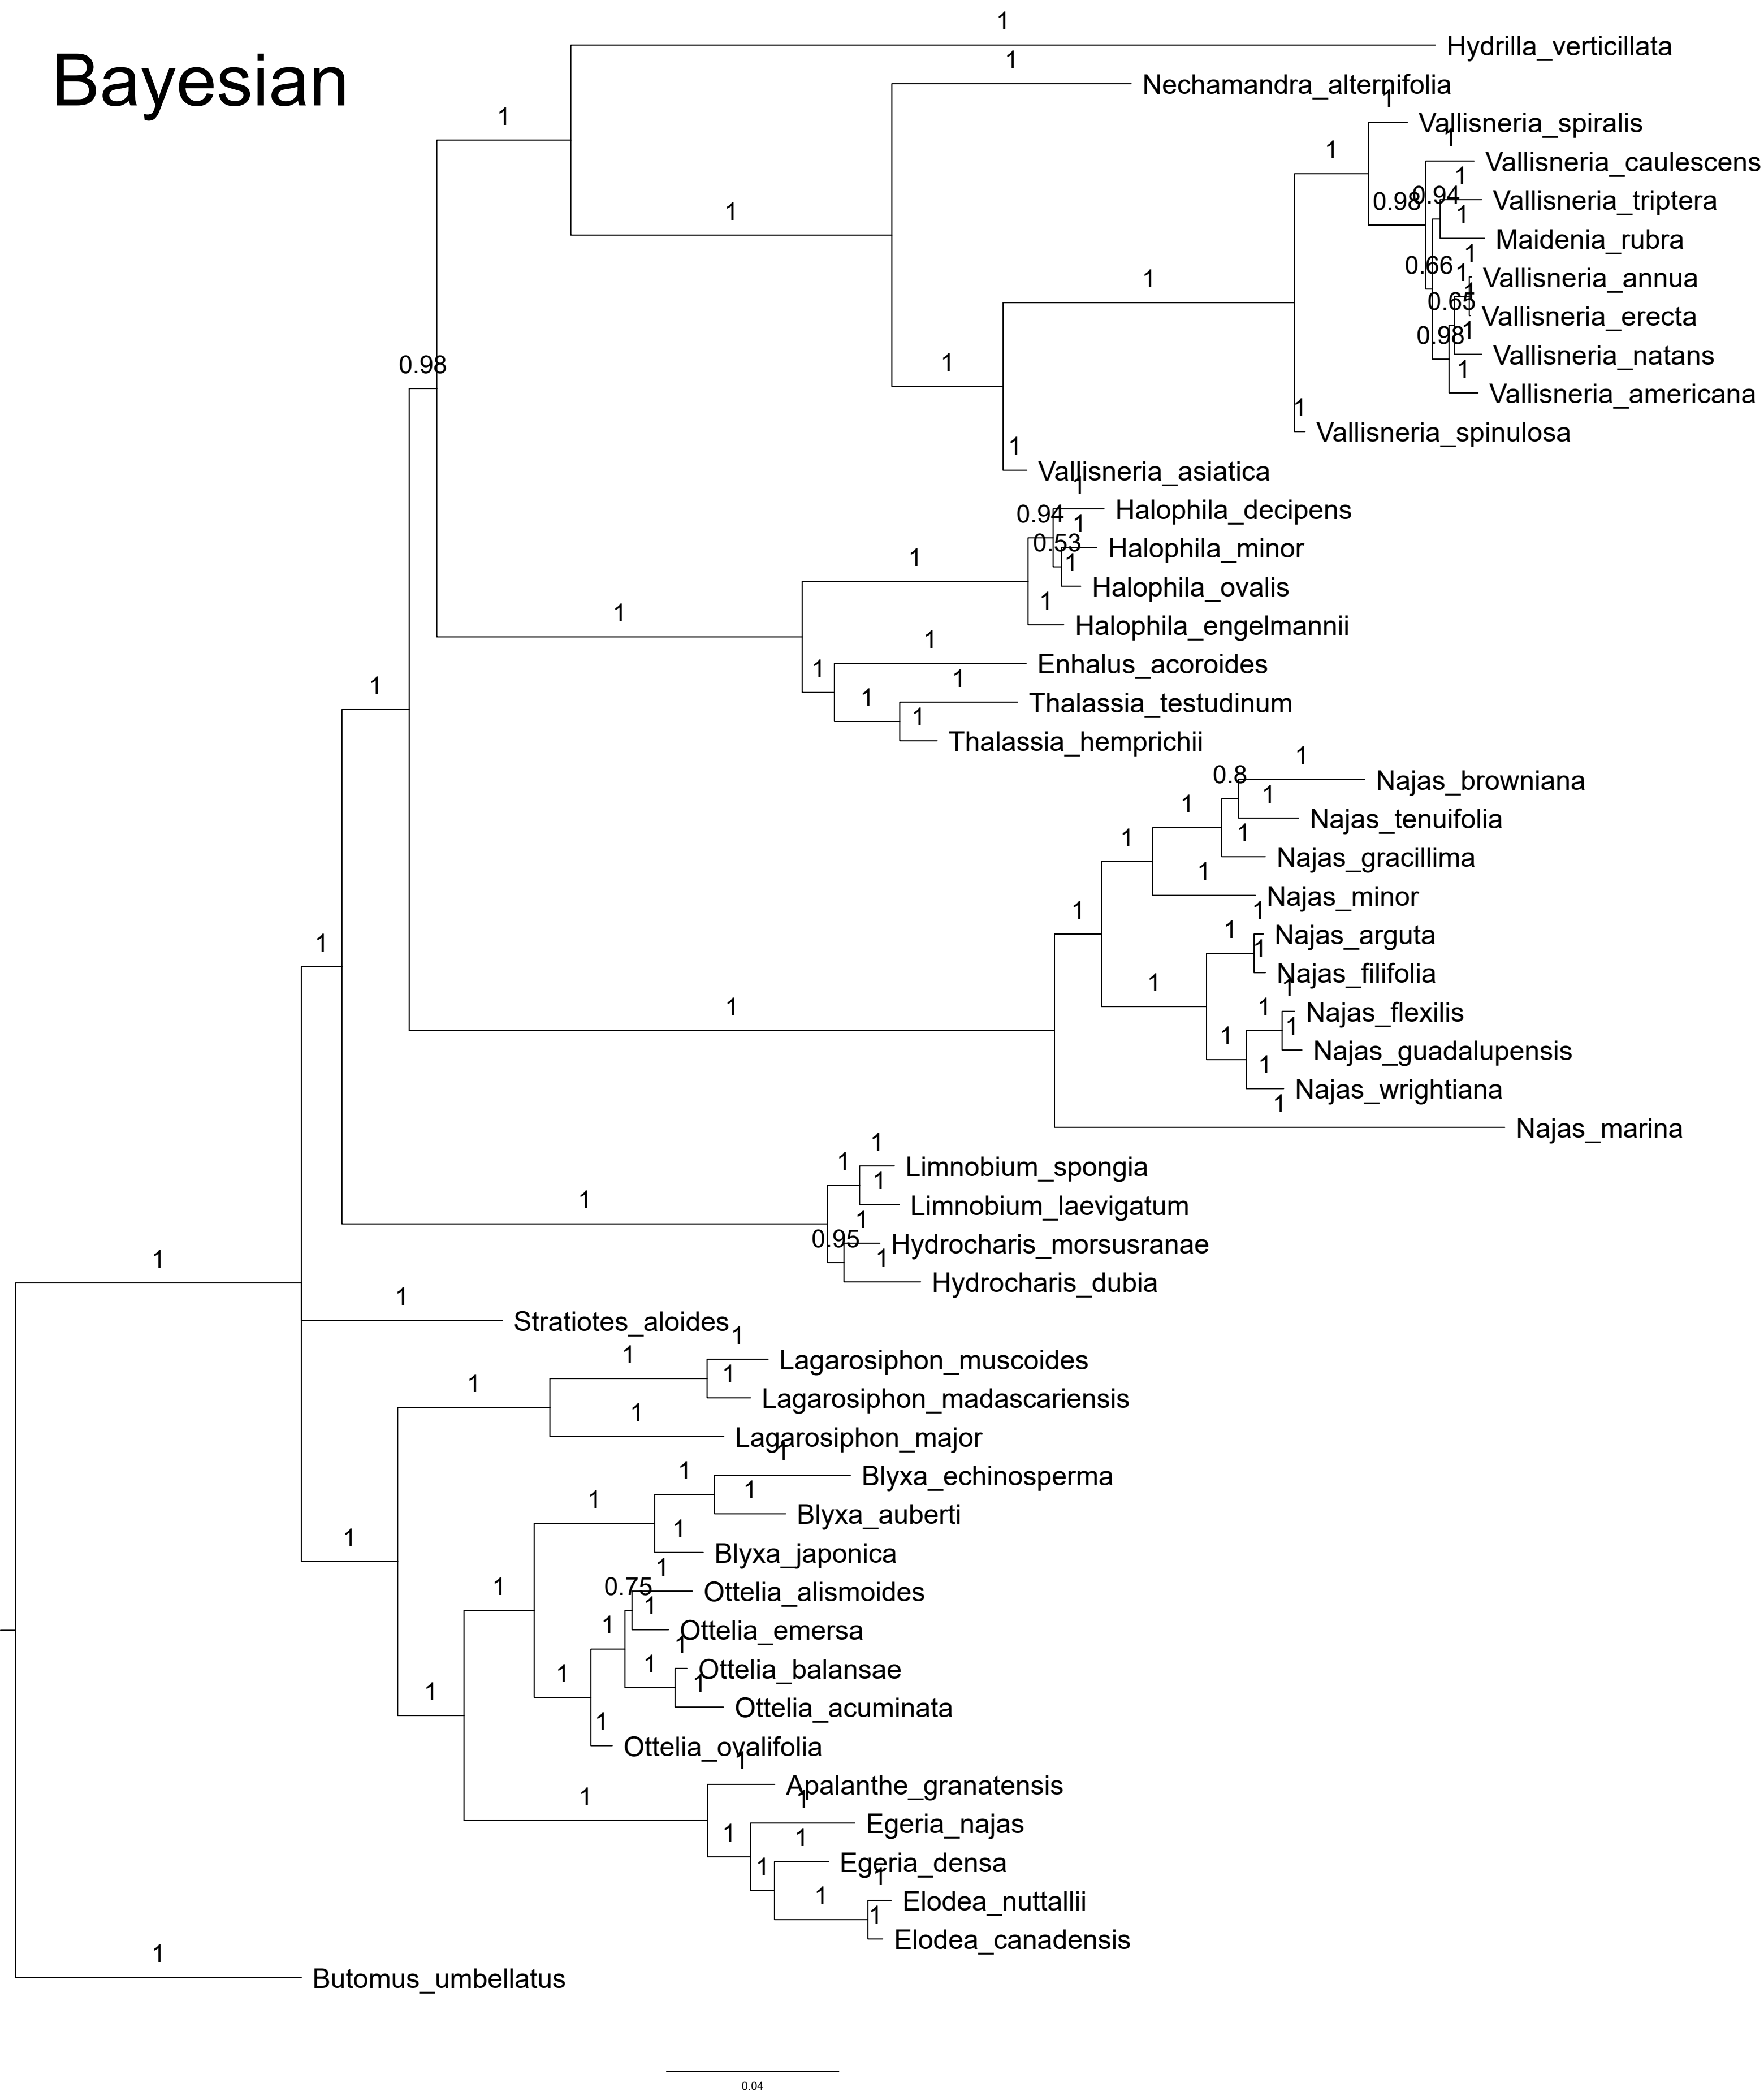

# IQTREE

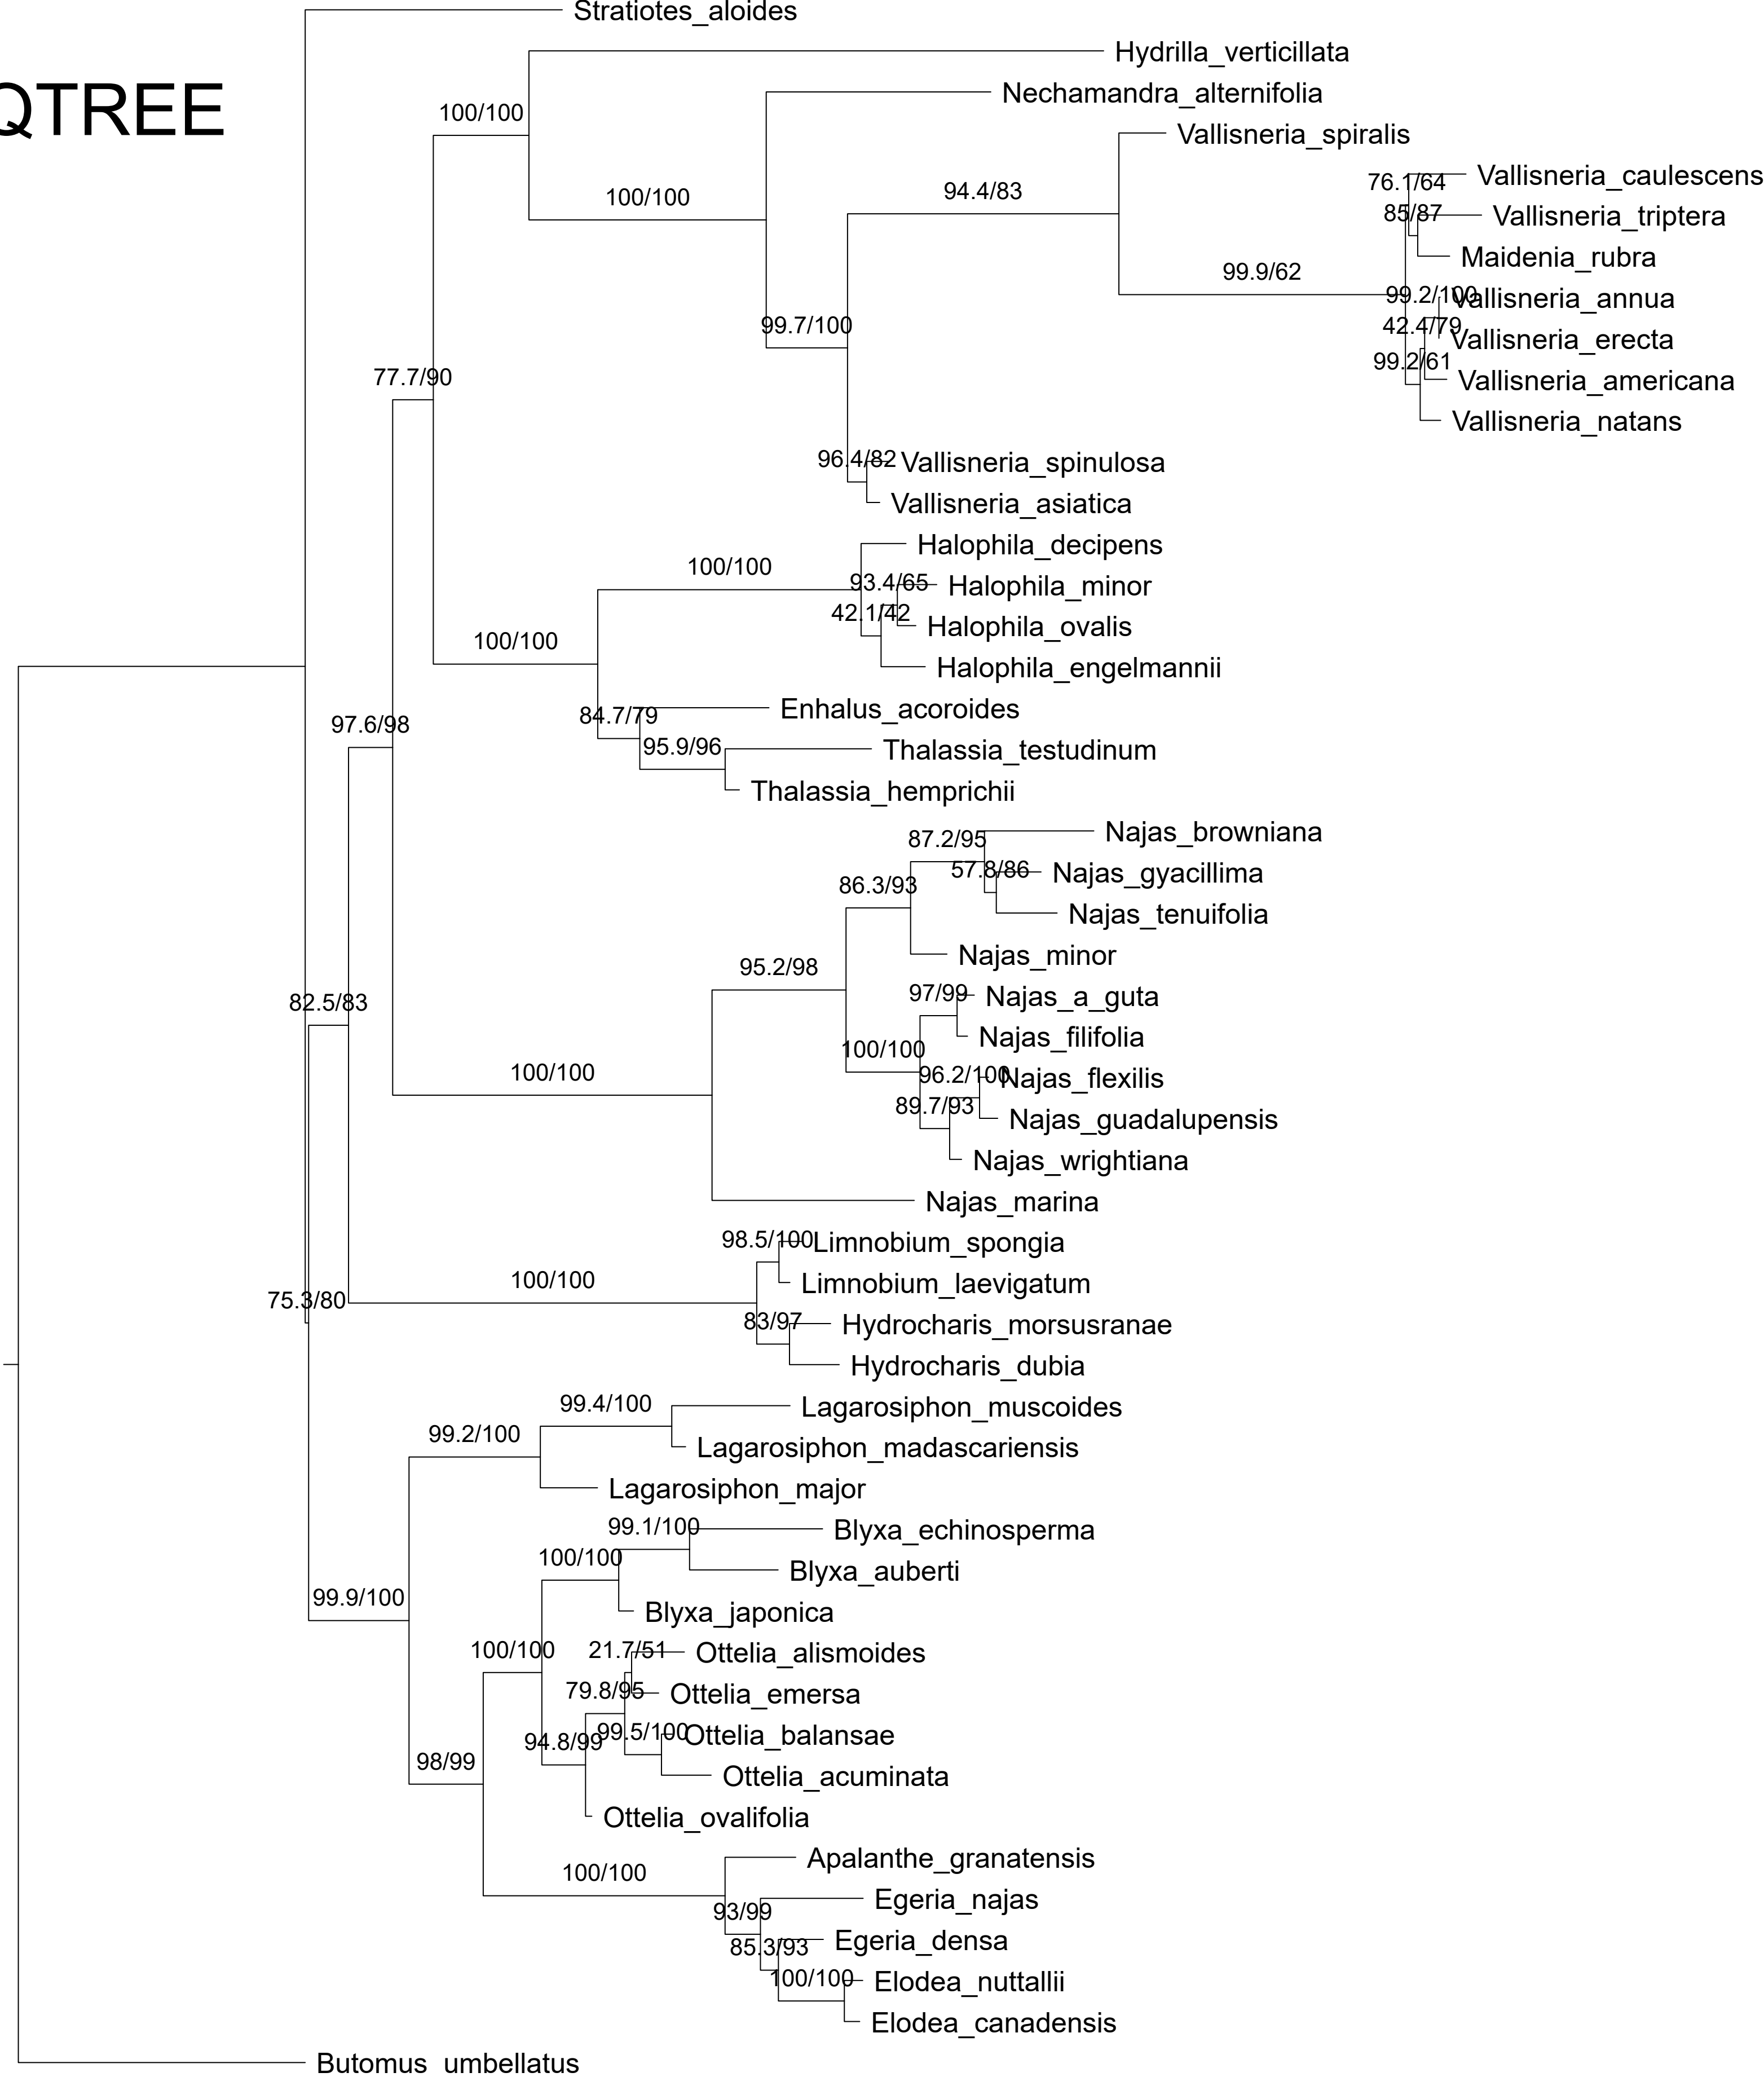

Supplement: s1 [file s1]
